# Supplementary material for: Tephrostratigraphy and Magma Evolution Based on Combined Zircon Trace Element and U-Pb Age Data: Fingerprinting Miocene Silicic Pyroclastic Rocks in the Pannonian Basin
Source: Frontiers journal article supplement (doi:10.3389/feart.2021.615768), 2021-02-25
Supplement: Table_1.xlsx [file Table_1.xlsx]

## Sheet: Note
Ti (re-calc) ppm = Ti(measured in sample)/(Average of Ti(measured in 91500))*4.73 (see details in Szymanowski et al. 2017)
Nb=Nb(measured in sample) - (Average Nb(measured in Synth Zirc Blank)
T © 0.6 = Ti-in-zircon temperature in C degree using 0.6 TiO2 activity and 1 SiO2 activity (Ferry and Watson, 2007)
0.6 Uncertainty= temperature uncertainty in C degree of T © 0.6 (based on Ferry and Watson, 2007)
Eu/Eu*=(Eu/0.058)/(SQRT(Sm/0153*Gd/0.2055))
aCe/Ce*= calculated after Zhong et al. 2019 without considering Pr data
aEu/Eu*= calculated after Zhong et al. 2019 without considering Pr data
bCe/Ce*= calculated after Zhong et al. 2019 with considering Pr data
bEu/Eu*= calculated after Zhong et al. 2019 with considering Pr data
cCe/Ce*(Loader)=(Ce/0.613)/((Nd/0.457)^2/(Sm/0.148)) (Loader et al. 2017)
Analyses were done during 12 sessions with slightly different setups (i.e. not all isotopes were measured in all of them)
at the ETH Zürich using Thermo Element XR SF-ICP-MS coupled with Resonetics Resolution 155 laser ablation system
data reduction used Iolite 3.0, integration intervals were set if possible to exclude inclusions
Session	spot size	refernce material	masses measured (amu)	quality control refernce material	Internal Standard	Samples
Session 20141111 (chemistry only)	30	NIST610	27, 28, 29, 31, 40, 49, 56, 85, 89, 91, 93, 138, 139, 140, 141, 146, 147, 153, 157, 159, 163, 165, 166, 169, 172, 175, 178, 181, 208, 232, 238	91500	Si, 14.8 wt%	Td-Agch, Td-H2Ngch, Td-Jgch, Td-Figch, Td-Hgch
Session 20141114 (chemistry only)	30	NIST610	27, 28, 29, 31, 40, 49, 85, 89, 91, 93, 138, 139, 140, 141, 146, 147, 153, 157, 159, 163, 165, 166, 169, 172, 175, 178, 181,, 232, 235, 238	91500	0	Td-A_CAgch, Td-Sgch
Session 20150323 Session 20150324 Session 20150325 Session 20150326a Session 20150326b Session 20150327b (chemistry and U-Pb dating)	30	NIST610	27, 29, 31, 48, 88, 89, 93, 115, 138, 139, 140, 141, 146, 147, 153, 157, 159, 163, 165, 166, 169, 172, 175, 178, 181, 202, 204, 206, 207, 208, 232, 235, 238	91500	Si, 15.2 wt%	FN1, Td-H, DEMSPA, EG1, EG2, CSO1, Cskly1, CsTb1 DEMHAN1 Csv2chage, DEMNE1chage, Mt1chage, TdEchage, TdLchage TdA_CA, TdH_CA TdFi1_CA, TdH1k, TdH2N_CA SZOM
Session 20160412 (chemistry only)	30	NIST610	27, 28, 29, 49, 91, 138, 139, 140, 141, 147, 153, 157, 159, 163, 165, 166, 169, 172, 175, 178, 232, 238	91500	Si, 15.2 wt%	Csv2gch, EG1gch, EG2gch, CsTb-1gch
Session 20160409p1 Session 20160409p2 (chemistry and U-Pb dating)	30	NIST610	27, 28, 31, 49, 88, 89, 91, 93, 138, 139, 140, 141, 146, 147, 153, 157, 159, 163, 165, 166, 169, 172, 175, 178, 232, 238	91500, Synth Zircon Blank	Si, 15.2 wt%	IT-BOR1, IT-PUB, IT-MU2, IT-KKB1, MSZ-1 MSZ-1, NEMTI, TAR-Gh-1, TAR-3, SZIV
Session 20191204 (chemistry and U-Pb dating)	30	NIST610	27, 28, 31, 49, 89, 91, 93, 138, 139, 140, 141, 146, 147, 153, 157, 159, 163, 165, 166, 169, 172, 175, 178, 181, 232, 238	91500, Synth Zircon Blank	Si, 15.2 wt%	SZVG
References:
Ferry, J.M., and Watson, E.B. (2007). New thermodynamic models and revised calibrations for the Ti-in-zircon and Zr-in-rutile thermometers. Contributions to Mineralogy and Petrology 154(4), 429-437. doi:10.1007/s00410-007-0201-0.
Loader, M.A., Wilkinson, J.J., and Armstrong, R.N. (2017). The effect of titanite crystallisation on Eu and Ce anomalies in zircon and its implications for the assessment of porphyry Cu deposit fertility. Earth and Planetary Science Letters 472, 107-119. doi:10.1016/j.epsl.2017.05.010.
Szymanowski, D., Wotzlaw, J.-F., Ellis, B.S., Bachmann, O., Guillong, M., and von Quadt, A. (2017). Protracted near-solidus storage and pre-eruptive rejuvenation of large magma reservoirs. Nature Geoscience 10(10), 777-782. doi:10.1038/ngeo3020.
Zhong, S., Seltmann, R., Qu, H., and Song, Y. (2019). Characterization of the zircon Ce anomaly for estimation of oxidation state of magmas: a revised Ce/Ce* method. Mineralogy and Petrology 113(6), 755-763. doi:10.1007/s00710-019-00682-y.

## Sheet: samples
Summary of the studied samples and the interpreted eruption ages. The identified main eruption units are presented with yellow background
No. In Fig. 1.	Sample name/Units*	Locality, layer	GPS coordinates	Lithological name of analysed sample	Volcanic facies	U-Pb age by LA-ICP-MS*	U-Pb ID-TIMS age*
	Harsány ignimbrite unit					14.3+/-0.2	14.361 ±0.016
1	Td-A; Td-A_CA	Tibolddaróc, layer A	47°55'31.59"N, 20°37'49.77"E	large pumice of rhyolite block-bearing lapilli tuff	unwelded ignimbrite
	Tibolddaróc unit					14.7+/-0.2
2	Td-E	Tibolddaróc, layer E	47°55'36.64"N, 20°37'55.19"E	rhyolite lapilli tuff	pyroclastic flow deposit
	Demjén ignimbrite unit					15.0+/-0.2	14.880±0.014
3	Td-H; Td-H_CA	Tibolddaróc, layer H	47°55'33.45"N, 20°37'55.55"E	rhyolite lapilli-bearing tuff	ash-flow deposit
4	FN-1	Felnémet, old quarry	47°56'0.09"N, 20°22'58.88"E	rhyolite lapilli tuff	unwelded ignimbrite
5	DEMNE-1	Demjén, Nagyeresztvény quarry	47°50'1.51"N, 20°20'37.19"E	rhyolite lapilli tuff	slightly welded ignimbrite
6	DEMSPA	Demjén, Spa side	47°50'16.54"N, 20°20'20.78"E	rhyolite lapilli tuff	unwelded ignimbrite
	Td-J unit	Tibolddaróc, layer J	47°55'36.01"N, 20°37'57.65"E	rhyolite fine tuff	pyroclastic fall deposit	16.2+/-0.3
9	Td-J	Tibolddaróc, layer J	47°55'36.01"N, 20°37'57.65"E	rhyolite fine tuff	pyroclastic fall deposit
	Td-L	Tibolddaróc, layer L	47°55'39.01"N, 20°37'59.68"E	rhyolite accretionary lapilli-bearing tuff	phreatomagmatic fall deposit	16.7+/-0.3
10	Td-L	Tibolddaróc, layer L	47°55'39.01"N, 20°37'59.68"E	rhyolite accretionary lapilli-bearing tuff	phreatomagmatic fall deposit
	Bogács unit					16.7+/-0.3	16.816±0.059
11	Td-S	Tibolddaróc, layer M (UMPU)	47°55'41.49"N, 20°37'58.37"E	2black scoria clasts of dacite scoria-bearing lapillit tuff	pyroclastic flow deposit
11	Td-Hk1_CA	Tibolddaróc, layer M (UMPU)	47°55'41.49"N, 20°37'58.37"E	3grey scoria clasts of dacite scoria-bearing lapillit tuff	pyroclastic flow deposit
11	Td-H2N; Td-H2N_CA	Tibolddaróc, layer M (UMPU)	47°55'41.49"N, 20°37'58.37"E	3grey scoria clasts of dacite scoria-bearing lapillit tuff	pyroclastic flow deposit
12	Td-Fi; Td-Fi_CA	Tibolddaróc, old quarry, layer M (LWPU)	47°55'48.14"N, 20°37'56.92"E	1fiamme clasts of dacite fiamme-bearing lapillit tuff	welded pyroclastic flow deposit
	Mangó ignimbrite unit					17.1+/-0.3	17.055±0.024
17	EG-2	Eger, Tihamér-quarry (upper, active)	47°53'8.04"N, 20°24'14.38"E	rhyolite lapilli tuff	unwelded ignimbrite
18	SZOM	Szomolya, fairy chimneys	47°53'29.74"N, 20°28'40.71"E	rhyolite lapilli tuff	unwelded ignimbrite
19	Mt-1	Cserépváralja, Mangó-tető	47°55'36.15"N, 20°34'17.11"E	large pumice of rhyolite block-bearing lapilli tuff	unwelded ignimbrite
21	DEMHAN1	Demjén, Hangács, old quarry	47°50'32.89"N, 20°20'21.98"E	rhyolite lapilli tuff	welded ignimbrite
23	CsO1	Cserépfalu, Ördögcsúszda	47°57'34.69"N, 20°32'47.72"E	large pumice of rhyolite block-bearing lapilli tuff	unwelded ignimbrite
24	CsTb1	Cserépfalu, Túr-bucka	47°57'40.11"N, 20°32'33.81"E	rhyolite lapilli tuff	welded ignimbrite
	Eger ignimbrite unit					17.5+/-0.3
27	EG-1	Eger, Tihamér old quarry (lower)	47°53'7.19"N, 20°24'0.63"E	rhyolite lapilli tuff	unwelded ignimbrite
	Csv-2	core sample from 240-243 m of Csv-2 drilling	47°55' 18,43"N, 20°33' 59,77"E	rhyolite lapilli tuff	ignimbrite	18.2+/-0.3
Csv-2	Csv-2	core sample from 240-243 m of Csv-2 drilling	47°55' 18,43"N, 20°33' 59,77"E	rhyolite lapilli tuff	ignimbrite
	*published in Lukács et al. 2018
	1 A-fiamme type clast of LWPU (Czuppon et al. 2012)
	2 black coloured scoria clast of UMPU (Czuppon et al. 2012)
	3 grey coloured scoria clast of UMPU (Czuppon et al. 2012)
Studied samples from distal locations outside of Bükkalja, Northern Hungary
	Sample name	Locality, layer	GPS coordinates	Lithological name of analysed sample	Volcanic facies	U-Pb age by LA-ICP-MS
	IT-BOR1	Ipolytarnóc, Borókás valley	48°13'59.64"N, 19°40'34.44"E	bulk rock	unwelded ignimbrite	17.3+/-0.3
	IT-PUB	Ipolytarnóc, Puhakő quarry	48°14'12.07"N, 19°39'17.17"E	bulk rock	unwelded ignimbrite	17.6+/-0.3
	IT-MU2	Ipolytarnóc, Mucsiny cave (Slovak Republic)	48°13'59.64"N, 19°40'34.44"E	bulk rock	unwelded ignimbrite	17.4+/-0.3
	IT-KKB1	Ipolytarnóc, Keménykő quarry	48°13'57.49"N, 19°39'25.70"E	bulk rock	reworked unwelded ignimbrite	17.2+/-0.3
	NEMTI	Nemti, Arany hill	47°59'44.64"N, 19°51'46.08"E	bulk rock	unwelded ignimbrite	17.1+/-0.3
	MSZ-1	Mátraszele, bentonite quarry	48°4'24.48"N, 19°52'40.31"E	bulk rock	unwelded ignimbrite	16.7+/-0.3
	TAR-Gh-1	Tar, Gömör hill	47°57'42.72"N, 19°45'6.09"E	bulk rock	unwelded ignimbrite	14.9+/-0.2
	TAR-3	Tar, Fehérkő quarry	47°57'9.88"N, 19°45'46.45"E	pumice	unwelded ignimbrite	15.0+/-0.2
	SZIV	Szilvásvárad	48°7'42.73"N, 20°23'29.45"E	bulk rock	reworked unwelded ignimbrite	14.3+/-0.2
	SZVG	Szentkút, Vadász gödör	48°0'40.03"N, 19°45'13.45"E	accretionary pellets	distal tuff	14.2+/-0.2

## Sheet: Zircon_data
Samples				Th_corrected_Age	Th_corrected_Age_2SE	Al	P	Ti	T(oC; 0.6)	abs (2s)	T(oC; 0.7)	T(oC; 0.5)	Rb	Sr	Zr	Y	Nb	Ba	La	Ce	Pr	Nd	Sm	Eu	Gd	Tb	Dy	Ho	Er	Tm	Yb	Lu	Hf	Ta	Th	U	Th/U	Yb/Dy	Zr/Hf	Eu/Eu*	aCe/Ce*(without Pr)	aCe4+/Ce3+(without Pr)	aEu/Eu*(without Pr)	bCe/Ce*(with Pr)	bCe4+/Ce3+(with Pr)	bEu/Eu*(with Pr)	alog(Ce4+/Ce3+)(without Pr)	blog(Ce4+/Ce3+)(withPr)	log(U/Pr)
Demjén Ignimbrite Unit
LR-01_Td-Hgch - 1	core/inner part of 2		ok,inhom inU,Th,REE	15.43		<2.9754	225.959	5.64362	740.023	37.3576	725.905	757.244	0.302078		476617	1539.54	1.89531	<0.097192	<0.039463	11.2264	0.0844356	1.98677	4.91157	0.668237	28.6143	10.2933	129.297	50.5787	248.983	52.0843	474.279	89.9998	10241.2	0.906935	273.215	431.974	0.632481	3.66813	46.5391	0.172327	165.616	164.616	0.150651	196.775	195.775	0.177415	2.21647	2.29176	3.70893
LR-01_Td-Hgch - 2	rim		ok	15.24		<3.005	241.608	3.8602	705.934	35.1766	692.744	722.007	0.133033		470423	704.096	1.87034	<0.12113	<0.041819	6.16779	0.036179	0.616133	1.44563	0.271807	10.2155	3.88943	53.4086	21.7735	115.963	27.5976	274.351	55.7597	9698.43	0.880814	125.734	299.576	0.419707	5.13684	48.505	0.216235	515.63	514.63	0.171495	326.342	325.342	0.1476	2.71149	2.51234	3.91805
LR-01_Td-Hgch - 4	rim		ok	14.65		<3.0305	233.642	3.15053	688.626	34.0969	675.895	704.131	0.144714		472397	950.242	3.464	<0.092566	<0.039377	11.7754	0.0422841	0.683407	1.79256	0.31846	12.4043	4.87826	67.1739	29.2265	161.705	39.1673	387.332	81.7522	10090.4	1.5529	275.638	586.251	0.47017	5.76611	46.8163	0.206469	1030.66	1029.66	0.163637	579.946	578.946	0.132673	3.01269	2.76264	4.14191
LR-01_Td-Hgch - 5	core/inner part		shorter,inhom.inU,REE,Th,endAlincl	14.47		<3.5256	117.113						0.248414		488123	1150.12	1.76256	<0.11633	<0.044061	11.1515	0.0751366	1.36068	2.97587	0.549674	17.2482	6.37404	84.3075	34.8472	187.88	45.0976	443.601	91.6929	11035	0.997357	405.429	774.786	0.523279	5.26171	44.2342	0.234558	367.082	366.082	0.186854	234.025	233.025	0.154423	2.56358	2.3674	4.01333
LR-01_Td-Hgch - 6	core/inner part		ok	14.32		<3.0257	181.693	5.88436	743.917	37.6114	729.692	761.272	0.0933906		464076	585.21	2.13028	<0.14009	<0.04247	7.26201	0.033138	0.388118	1.16053	0.21985	7.76035	3.05245	44.8675	18.4999	96.6829	23.2308	229.589	44.1666	9727.09	0.969202	117.783	287.678	0.409427	5.11703	47.7096	0.223966	1002.27	1001.27	0.184242	528.051	527.051	0.155638	3.00055	2.72185	3.93858
LR-01_Td-Hgch - 8	rim		ok	14.54		<2.9505	139.682	2.7884	678.514	33.4746	666.048	693.692	0.260194		479429	1147.43	2.06399	<0.10445	<0.039346	10.2985	0.10798	1.76346	3.19648	0.764602	18.0689	6.59335	84.3063	35.0575	190.952	46.2855	469.091	102.591	9898.96	0.948303	419.532	773.537	0.542355	5.56412	48.4322	0.307579	263.88	262.88	0.235197	133.908	132.908	0.16714	2.41976	2.12355	3.85514
LR-01_Td-Hgch - 9	core/inner part of 10		ok,inhom,1stparthigherinU,HREE,Th,Y	14.91		<2.9704	177.079	4.52776	719.967	36.0657	706.399	736.508	0.200204		474300	1135.35	1.85475	<0.14721	<0.035301	10.1917	0.0616576	1.31878	2.71013	0.527173	18.7511	6.78576	87.7858	35.6192	182.381	41.1922	396.341	78.4097	10109.2	0.864835	260.876	442.366	0.589728	4.51486	46.9176	0.226083	314.936	313.936	0.181369	266.031	265.031	0.17728	2.49684	2.4233	3.8558
LR-01_Td-Hgch - 10	rim		ok	14.14		<3.005	190.853	4.38253	717.066	35.8809	703.577	733.51	0.150523		470572	859.778	2.48765	<0.1261	<0.035482	9.44425	0.0700441	0.936181	1.66547	0.444301	10.8423	3.97968	57.7603	25.2457	141.971	36.9101	377.48	83.0408	9806.12	1.00192	315.876	596.52	0.529532	6.53528	47.9875	0.319647	656.775	655.775	0.228779	240.633	239.633	0.142862	2.81675	2.37955	3.93025
LR-01_Td-Hgch - 11	core/inner part		ok	14.79		<3.0685	142.527	4.18315	712.953	35.6198	699.574	729.259	0.101153		473663	522.489	1.44876	<0.1707	<0.040925	5.58775	0.0203161	0.429816	1.01283	0.192933	6.74472	2.79891	40.1272	16.5404	87.1828	20.4052	194.322	39.0104	9989.45	0.519935	81.0684	196.338	0.412902	4.84266	47.4163	0.225673	694.356	693.356	0.171702	535.557	534.557	0.16379	2.84096	2.72799	3.98516
LR-01_Td-Hgch - 12	rim		ok	14.3		<3.0134	195.796	6.91729					0.15284		470383	627.687	1.77779	0.0936955	<0.038973	6.43688	0.0329633	0.481371	1.26702	0.198195	9.21708	3.65911	49.432	19.959	101.945	23.4097	221.129	43.6957	9830.06	0.838943	90.5426	205.244	0.441147	4.4734	47.8515	0.177308	627.427	626.427	0.144921	419.485	418.485	0.135513	2.79687	2.62168	3.79424
LR-01_Td-Hgch - 13	rim		ok	15.23		<2.9677	183.42	5.33356	734.801	37.0189	720.828	751.844	0.137722		472442	702.065	1.98067	<0.11296	<0.039363	7.36571	0.0396785	0.601947	1.62439	0.255585	9.97234	4.05962	53.8102	22.1216	117.123	27.41	273.157	53.8063	9712.54	0.879562	130.62	304.456	0.429027	5.07631	48.6424	0.194141	581.091	580.091	0.158165	366.081	365.081	0.138583	2.7635	2.56239	3.88497
LR-01_Td-Hgch - 16	rim		ok	14.79		<3.0084	147.325	3.7405	703.21	35.0054	690.093	719.192	0.0844902		471888	389.968	1.05103	<0.13297	<0.038124	3.41318	<0.017905	0.281097	0.786415	0.200249	5.32033	1.96352	26.893	11.7779	65.0024	16.9294	181.881	38.2853	8974.8	0.452232	66.1671	193.17	0.342533	6.76313	52.5792	0.299294	762.546	761.546	0.246065				2.8817	#NUM!	#VALUE!
LR-01_Td-Hgch - 17	core/inner part		ok	15		<2.9452	222.437	6.04727	746.48	37.7788	732.183	763.923	0.24906		472947	1523.27	1.80312	<0.1107	<0.035657	10.6435	0.107586	1.99613	4.77552	0.760618	29.5754	9.98293	130.134	50.6225	242.295	53.1046	471.226	86.7651	9862.65	0.809994	275.782	417.659	0.660304	3.62109	47.9534	0.195666	155.792	154.792	0.172101	158.067	157.067	0.194038	2.18975	2.19608	3.58906
LR-01_Td-Hgch - 18	core/inner part		ok, inhom.inU,Th,REE(1stishigher)	15.14		<3.0336	274.732	6.15087	748.08	37.8836	733.738	765.579	0.258448		480566	1203.08	1.81261	<0.077902	<0.040515	9.17922	0.107258	1.74557	3.67306	0.506783	22.3865	7.73528	100.664	39.7791	194.048	42.1761	387.185	74.1975	9916.44	0.838459	202.846	340.5	0.595729	3.84632	48.4615	0.170859	165.723	164.723	0.142978	133.178	132.178	0.141241	2.21675	2.12116	3.50169
LR-01_Td-Hgch - 20	rim		ok	14.49		<3.4945	205.511						0.433855		491430	1687.64	6.71512	0.173055	<0.045874	31.1843	0.0734322	1.24747	3.1825	0.680336	22.6898	8.56664	122.868	51.893	282.288	67.3953	683.94	142.576	9981.46	2.79972	1101.68	1925.63	0.572116	5.56644	49.2343	0.244764	1458.46	1457.46	0.19478	863.169	862.169	0.161291	3.1636	2.93559	4.41869
LR-01_Td-Hgch - 21	rim		ok	15.03		<2.9943	164.461	4.18743	713.043	35.6255	699.662	729.352	0.144173		479045	628.142	2.16891	<0.11241	0.110475	7.24322	0.0474654	0.58218	1.0262	0.308297	6.78534	2.64693	41.0926	18.2565	107.666	28.0218	312.437	70.0201	9189.42	1.01091	206.298	501.205	0.411604	7.60324	52.1301	0.357183	1047.29	1046.29	0.241267	300.699	299.699	0.132573	3.01965	2.47669	4.02364
LR-01_Td-Hgch - 22	rim		ok	15.27		<3.0603	213.61	4.49797	719.378	36.0282	705.826	735.899	0.284053		475866	1152.26	2.8852	<0.1148	<0.042027	10.4258	0.095036	1.35994	2.8354	0.580632	15.9691	5.73111	81.2856	34.9814	192.826	46.8311	482.079	101.57	9378.8	1.2176	323.248	654.719	0.49372	5.93068	50.7385	0.263801	395.548	394.548	0.203261	182.009	181.009	0.142772	2.5961	2.2577	3.83817
LR-01_Td-Hgch - 24	rim		ok	14.47		<3.4511	161.407	4.73804	724.034	36.3257	710.356	740.712	<0.10571		488100	501.831	1.76094	<0.1481	<0.042057	7.53126	0.0285097	0.434258	1.09778	0.179251	6.5096	2.52978	35.2189	15.1146	82.3612	19.8411	209.703	45.4792	10139.1	0.748687	285.114	468.354	0.608758	5.95427	48.1402	0.204998	970.615	969.615	0.162257	480.488	479.488	0.118593	2.9866	2.68078	4.21558
LR-01_Td-Hgch - 25	rim		shorter,endCa,LREErichincl.	14.42		<3.5914	199.627	5.70825	741.081	37.4265	726.934	758.339	0.171141		509040	1356.7	1.58526	<0.14465	<0.04388	10.3522	0.0741559	1.7008	4.19334	0.633691	26.3383	9.24213	117.494	45.6063	215.406	46.568	417.867	74.3337	10365.1	0.620215	212.679	324.815	0.654769	3.55649	49.1108	0.184343	174.727	173.727	0.162558	221.117	220.117	0.2042	2.23987	2.34265	3.64149
LR-01_Td-Hgch - 26	core/inner part of 27		ok	14.5		<2.9881	145.757	2.89884	681.708	33.6705	669.158	696.989	0.292963		477911	1074.4	1.38718	<0.15559	<0.038883	7.49146	0.131686	2.32479	3.45906	0.840395	16.5844	6.04901	78.4478	31.636	174.027	42.8659	460.033	95.2382	9523.51	0.622086	353.691	590.118	0.599356	5.8642	50.1822	0.339218	136.137	135.137	0.246494	67.7149	66.7149	0.167679	2.13078	1.82422	3.6514
LR-01_Td-Hgch - 28	rim		ok	14.76		<2.9836	221.935	6.55493	754.119	38.2806	739.609	771.827	0.181604		479339	740.486	2.09958	<0.12515	<0.040282	7.26555	0.0240872	0.582705	1.62601	0.198362	11.2562	4.26116	58.3084	23.7679	122.89	27.5231	264.28	52.5662	10007.7	1.06878	112.226	271.315	0.413638	4.53244	47.897	0.141751	560.911	559.911	0.119457	558.317	557.317	0.12868	2.74812	2.7461	4.05169
LR-01_Td-Hgch - 29	rim of 28		ok	15.26		<3.0924	92.4632						0.125249		487229	439.045	1.22025	<0.14436	<0.040911	5.23372	<0.018186	0.326421	0.692532	0.192336	5.16075	2.07106	28.3877	12.8006	73.5224	19.0338	209.165	46.0355	10705.8	0.515302	117.506	315.721	0.372184	7.36814	45.5108	0.311034	1261.66	1260.66	0.225976		-1		3.1006	#NUM!	#VALUE!
DEMSPA-Grain1 - 2	rim	Analysis 2		15.028	0.345094	<4.9143	149.257							0.485103		585.663	1.80525	<0.067979	0.0923819	8.86992	0.0475506	0.659437	1.16606	0.311399	7.49844	2.70313	39.9647	17.0496	98.0871	25.2002	268.353	57.2561	10062.8	0.924924	384.684	735.107	0.523304	6.71474	0	0.321955	874.783	873.783	0.230963	327.908	326.908	0.145242	2.9414	2.51443	4.18919
DEMSPA-Grain2 - 3	rim			15.268	0.411304	<4.927	185.315							0.331193		527.729	1.64457	<0.07023	<0.037966	5.95284	0.0261426	0.473701	1.18511	0.267731	7.0495	2.55663	36.911	15.9106	87.7022	22.1737	236.287	50.6084	9246.56	0.722376	147.07	348.703	0.421765	6.40154	0	0.283181	731.504	730.504	0.22602	394.474	393.474	0.16814	2.86362	2.59492	4.12511
DEMSPA-Grain3 - 4	rim			14.643	0.439063	<5.1603	220.104							0.270322		578.702	1.65849	<0.075194	<0.025849	6.12872	0.0273163	0.396924	1.28437	0.161445	8.759	3.25699	44.6461	18.828	96.2493	21.4393	204.015	39.2464	10426.2	0.812803	82.1736	192.668	0.426504	4.5696	0	0.147155	679.566	678.566	0.129542	497.601	496.601	0.128239	2.83159	2.69601	3.84839
DEMSPA-Grain4 - 5	rim		melt inclusion avoided	14.636	0.37141	<6.1192	189.399							0.611414		807.668	3.00189	<0.091746	0.871949	12.2901	0.202758	1.38427	1.39052	0.375801	8.68419	3.39014	52.367	23.8834	139.801	35.7601	394.944	87.5432	9880.15	1.4333	301.494	729.412	0.413339	7.54185	0	0.33062	721.453	720.453	0.191281	111.123	110.123	0.0790226	2.85761	2.04188	3.55599
DEMSPA-Grain5 - 6	rim			14.997	0.247308	<4.9254	168.105							0.554255		901.152	3.25878	0.17212	0.0451001	14.42	0.0418057	0.609137	1.51128	0.35677	10.9408	4.18406	61.5514	27.1631	157.892	40.0543	428.454	92.3952	9815.15	1.47923	499.938	925.686	0.540073	6.96091	0	0.268234	1787.39	1786.39	0.204493	755.055	754.055	0.140972	3.25198	2.8774	4.34523
DEMSPA-Grain6 - 7	core/inner part	Analysis 1		14.717	0.385682	<5.018	243.979							0.450074		1141.11	1.8775	<0.084231	<0.053377	8.85212	0.0727121	1.57278	3.36583	0.454972	21.5049	7.39209	95.6014	37.4474	183.923	39.2339	365.82	68.7405	10228.8	0.73251	174.892	295.266	0.59232	3.82651	0	0.163491	177.385	176.385	0.138031	183.136	182.136	0.152069	2.24646	2.26039	3.60861
DEMSPA-Grain6 - 8	rim	Analysis 2		15.306	0.320409	<4.8144	245.621							0.400986		690.735	1.98774	<0.07953	<0.028931	8.25364	0.0394547	0.473358	1.62155	0.269316	10.7051	4.11723	54.3746	22.1325	112.221	24.5556	231.039	44.9189	10234.8	0.862623	133.493	289.565	0.461012	4.24903	0	0.197617	699.643	698.643	0.178051	471.901	470.901	0.172265	2.84426	2.67293	3.86565
DEMSPA-Grain7 - 9	rim			14.817	0.359468	<5.0194	224.153							0.395832		638.516	2.08584	0.0749355	<0.039643	8.07773	<0.028332	0.670943	1.45481	0.208567	9.84751	3.69779	48.459	20.2144	106.66	23.8753	234.504	45.1007	10853.3	0.996824	146.049	333.23	0.438283	4.83923	0	0.168463	534.658	533.658	0.133595		-1		2.72726	#NUM!	#VALUE!
DEMSPA-Grain9 - 11	rim		melt inclusion avoided	15.186	0.372252	<6.063	153.303							0.508651		352.761	1.20365	<0.086754	0.0450232	5.24928	0.0236279	0.497911	0.699078	0.17103	3.92374	1.63466	23.8793	10.2598	59.0568	15.1552	165.599	38.1018	9689.61	0.574767	151.991	387.056	0.392684	6.93484	0	0.315707	748.168	747.168	0.201676	315.388	314.388	0.123481	2.87342	2.49747	4.21435
DEMSPA-Grain10 - 12	rim			15.575	0.339004	<5.1271	150.597							0.477519		559.85	1.93025	<0.067364	<0.031443	7.24184	<0.024941	0.376794	1.12709	0.253476	6.71014	2.51848	35.8897	16.2464	94.535	25.2054	275.679	60.3677	9902.79	0.875467	232.585	552.654	0.420851	7.68127	0	0.281783	1355.24	1354.24	0.229182		-1		3.1317	#NUM!	#VALUE!
DEMSPA-Grain11 - 13	rim			15.105	0.273697	<5.1088	250.986							0.355142		918.981	2.75862	0.105687	<0.038286	12.2458	0.0513064	0.934611	2.07125	0.383186	12.5441	4.77444	64.9451	27.8358	151.946	35.8126	357.542	72.652	10291.8	1.25989	344.662	644.875	0.534463	5.5053	0	0.229824	658.871	657.871	0.178596	413.037	412.037	0.148873	2.81814	2.61494	4.0993
DEMSPA-Grain12 - 14	rim			15.009	0.346163	<5.0557	380.295							0.385184		1223.12	2.07222	0.0712976	0.0363568	8.99434	0.0605977	1.3742	3.02427	0.513978	20.1913	7.36157	98.6318	40.1825	201.397	42.7687	411.257	78.0465	10456.7	0.928381	205.306	377.898	0.543284	4.16962	0	0.201084	249.699	248.699	0.163505	246.136	245.136	0.176468	2.39567	2.38941	3.79492
DEMSPA-Grain14 - 16	rim			15.751	0.417975	<5.1809	144.474							0.511805		586.124	1.70513	<0.087951	<0.03186	6.07007	0.031154	0.497683	1.41201	0.276064	7.79329	3.01108	41.9936	17.9375	97.2888	23.7654	249.266	51.7929	9975.13	0.774589	163.43	380.481	0.429536	5.93581	0	0.254422	641.005	640.005	0.208951	356.652	355.652	0.163296	2.80618	2.55102	4.08682
DEMSPA-Grain17 - 19	core/inner part			15.648	0.35058	<5.1022	511.876							0.920413		1523.22	5.15462	0.177918	2.74172	30.0727	0.808351	4.68398	4.08537	0.496283	24.8447	9.33539	122.815	49.398	251.787	54.9846	520.96	97.8518	10702.2	2.59554	851.771	1177.88	0.723138	4.24183	0	0.150599	240.018	239.018	0.0943982	59.6285	58.6285	0.054854	2.37843	1.76811	3.1635
DEMSPA-Grain18 - 20	core/inner part	Analysis 1		14.553	0.254127	<4.9242	189.466							0.527663		1786.24	2.22724	<0.066872	<0.0377	10.9724	0.205628	3.32007	5.97227	1.07934	32.4699	11.1795	145.936	58.0404	293.916	65.3486	637.177	121.178	9530.92	0.982458	461.923	732.386	0.630709	4.36613	0	0.236958	108.251	107.251	0.188927	74.2739	73.2739	0.166191	2.0304	1.86495	3.55166
DEMSPA-Grain18 - 21	rim	Analysis 2		15.52	0.332001	<4.9505	282.325							0.430008		1122.03	3.59983	0.0847828	<0.049814	10.8171	0.0543166	1.19136	2.36186	0.55716	13.9875	5.37424	78.5176	34.2639	192.425	47.4204	491.181	102.379	9058.89	1.50909	372.691	752.988	0.49495	6.25568	0	0.296351	550.988	549.988	0.215741	329.465	328.465	0.168271	2.74035	2.51649	4.14186
DEMSPA-Grain21 - 24	rim			15.188	0.346363	<5.0228	217.589							0.467915		687.694	2.03534	<0.071453	<0.030587	8.20311	0.0320965	0.456312	1.64963	0.199267	10.7863	3.93876	54.3429	21.9954	115.914	26.1333	251.924	50.0523	10523.4	0.954087	151.751	346.048	0.438527	4.63583	0	0.14442	778.966	777.966	0.132311	553.943	552.943	0.126909	2.89096	2.74268	4.03268
DEMSPA-Grain22 - 25	rim		melt avoided late	15.337	0.266339	<4.9927	376.73							0.858277		2985.01	5.02537	0.128695	<0.046183	25.5877	0.397509	5.72289	9.94225	2.14457	53.4561	18.4128	240.6	94.6096	493.075	115.826	1155.67	229.45	7995.95	1.67831	918.884	1292.04	0.71119	4.80331	0	0.284396	160.434	159.434	0.22319	88.3175	87.3175	0.17209	2.20258	1.9411	3.51193
DEMSPA-Grain23 - 26	rim			14.919	0.300818	<5.0128	239.502							0.508229		662.213	2.11255	0.161195	0.0424943	8.49302	0.0436829	0.515161	1.52043	0.277527	10.0496	3.62787	52.2504	21.1704	110.521	25.0764	246.249	48.0239	10555.1	0.980018	148.406	328.995	0.45109	4.71286	0	0.217057	746.734	745.734	0.186561	423.544	422.544	0.16171	2.87258	2.62587	3.87688
DEMSPA-Grain28 - 32	rim	Analysis 1		14.706	0.300066	<5.2881	320.647							0.465707		1169.49	4.74849	<0.083808	0.194628	13.8567	0.0662819	0.889343	2.24141	0.309847	15.9149	6.1786	88.2866	37.1181	197.842	46.0163	445.071	89.2289	10655	2.15066	246.93	570.156	0.433092	5.0412	0	0.158602	842.333	841.333	0.125426	463.309	462.309	0.10559	2.92497	2.66493	3.9346
DEMSPA-Grain28 - 33	rim	Analysis 2		15.542	0.365025	<4.9129	258.528							0.286513		882.563	3.00744	<0.070522	<0.043095	10.3453	0.04092	0.608327	1.96453	0.256798	13.6241	5.07998	68.8373	27.9306	149.234	33.719	330.491	64.7455	10872.4	1.53098	240.741	571.988	0.420886	4.80105	0	0.151751	780.973	779.973	0.133744	548	547	0.127134	2.89208	2.73799	4.14545
DEMSPA-Grain30 - 35	rim			15.312	0.346067	<5.6143	319.172							0.296861		901.304	2.7241	<0.070965	<0.060562	11.7897	0.0804132	0.972844	1.99248	0.319907	14.4218	5.2897	72.0414	28.9217	148.626	32.4597	309.325	59.5521	10579.5	1.22966	232.046	440.046	0.527323	4.29371	0	0.182449	511.544	510.544	0.143791	290.381	289.381	0.124874	2.70803	2.46147	3.73817
DEMSPA-Grain31 - 36	rim	Analysis 1		15.358	0.346359	<5.1548	241.588							0.394358		752.106	2.11407	<0.076925	<0.031541	9.95045	0.0354954	0.671576	1.71155	0.306133	11.7428	4.51257	61.7016	24.2601	124.471	27.6693	261.691	49.9333	10526	0.962891	167.774	345.561	0.485512	4.24124	0	0.208763	621.853	620.853	0.172229	538.261	537.261	0.179544	2.79299	2.73019	3.98835
DEMSPA-Grain31 - 37	core/inner part	Analysis 2		15.623	0.26768	<4.9775	332.98							0.495382		1219.42	3.77525	<0.082613	0.0331694	10.8914	0.0386177	1.20671	2.78302	0.527951	18.0475	6.68454	93.7282	39.2802	208.518	46.9214	457.108	90.7185	9217.65	1.46894	210.872	460.525	0.457896	4.87696	0	0.227746	422.613	421.613	0.181081	454.165	453.165	0.193589	2.62491	2.65626	4.07647
DEMSPA-Grain32 - 38	rim	Analysis 1		15.022	0.227346	<4.8573	261.153							0.60843		1021.81	3.79463	<0.078231	0.285385	20.6737	0.146927	1.14956	2.26396	0.49547	14.7832	5.71753	75.8378	31.5739	168.102	41.11	424.578	87.0043	10146.2	1.78676	1140.48	1526.78	0.746988	5.5985	0	0.261831	935.321	934.321	0.197647	285.871	284.871	0.122819	2.9705	2.45465	4.01667
DEMSPA-Grain32 - 39	rim	Analysis 2		15.51	0.227537	<4.8454	208.03							0.366527		809.348	2.82843	0.108607	<0.034117	14.2532	0.0369522	0.877903	1.55128	0.449422	10.9543	4.13906	58.309	24.7236	134.33	33.4203	353.711	74.1996	10225	1.37062	787.805	1169.72	0.673498	6.06615	0	0.333304	996.02	995.02	0.239755	626.827	625.827	0.190526	2.99783	2.79645	4.50044
DEMSPA-Grain33 - 40	rim	Analysis 1		14.822	0.437934	<4.9189	247.353							0.361495		776.944	2.02281	<0.073187	<0.037961	7.48615	<0.030422	0.612641	1.84585	0.309862	12.0712	4.48301	61.7634	24.9383	129.162	29.1438	290.096	56.1459	9776.87	0.982452	137.183	307.295	0.446421	4.69689	0	0.200687	533.29	532.29	0.174058		-1		2.72615	#NUM!	#VALUE!
DEMSPA-Grain33 - 41	core/inner part	Analysis 2		15.402	0.260311	<5.087	422.817							0.789151		2490.51	5.33264	0.112081	0.200783	21.275	0.24722	3.69333	7.37342	1.17518	45.9693	16.1847	211.727	82.4803	407.044	88.1051	815.387	153.186	9625.47	1.87676	620.882	930.097	0.667545	3.85112	0	0.195147	186.227	185.227	0.159663	138.958	137.958	0.15431	2.2677	2.13975	3.57544
DEMSPA-Grain34 - 42	core/inner part			15.33	0.517752	<4.8644	156.14							0.366218		379.414	1.56428	<0.068098	0.0213161	5.52992	<0.020314	0.181518	0.524741	0.116793	4.99819	1.9596	28.6898	12.1211	63.3764	14.7648	144.533	28.7731	10886	0.712774	68.7927	181.044	0.379977	5.03779	0	0.220475	1989.14	1988.14	0.177734		-1		3.29845	#NUM!	#VALUE!
DEMSPA-Grain35 - 44	core/inner part	Analysis 2		15.378	0.385673	<4.956	240.33							0.37114		793.248	2.19666	<0.084016	<0.034588	8.57903	<0.022463	0.685965	1.87357	0.244469	12.1186	4.5332	62.8673	25.6761	130.81	29.1507	284.553	54.8984	10188.1	1.096	139.164	301.511	0.461555	4.52624	0	0.156851	534.083	533.083	0.131993		-1		2.7268	#NUM!	#VALUE!
DEMSPA-Grain38 - 47	rim	Analysis 1		15.145	0.391099	<4.9263	161.089							0.338746		621.843	1.98684	0.118135	<0.030413	7.72181	0.0300709	0.473124	1.20193	0.29077	7.35152	2.78906	40.4837	18.3038	106	27.4899	310.7	68.7255	10110.7	1.03732	239.602	594.896	0.402764	7.67469	0	0.299051	1197.2	1196.2	0.2305	489.341	488.341	0.148442	3.0778	2.68872	4.29629
DEMSPA-Grain39 - 50	rim	Analysis 2		14.651	0.299605	<5.8034	180.554							0.309134		524.093	1.67963	<0.076998	0.270963	9.08652	0.0846504	0.731792	1.01339	0.275508	6.43461	2.49544	35.9353	15.8613	90.229	22.1824	243.707	52.4602	10581.1	0.855539	342.368	702.677	0.487233	6.78183	0	0.329843	841.001	840.001	0.215896	197.918	196.918	0.111079	2.92428	2.29429	3.91913
DEMSPA-Grain40 - 51	rim	Analysis 1, few common-Pb		15.185	0.535994	<5.0725	191.292							0.317728		693.065	2.15881	<0.083322	<0.042547	9.14302	0.0236694	0.61999	1.30781	0.19517	10.815	4.19937	55.6289	22.2429	114.516	25.9083	246.978	47.3088	10577	1.02032	156.124	340.647	0.458316	4.43974	0	0.158654	702.961	701.961	0.123503	718.485	717.485	0.136331	2.84631	2.85581	4.15812
DEMSPA-Grain40 - 52	core/inner part	Analysis 2		15.292	0.3388	<5.006	352.058							0.543303		1301.46	3.68863	0.122686	0.236695	15.4044	0.130106	1.58253	3.341	0.483373	21.3613	7.8693	105.128	42.5149	213.004	46.8953	445.031	85.0471	10145.2	1.52542	335.535	563.929	0.594995	4.23321	0	0.174926	371.048	370.048	0.140249	218.084	217.084	0.122615	2.56826	2.33663	3.63693
DEMSPA-Grain41 - 53	rim	few common-Pb		14.84	0.47136	<5.0949	169.064							0.472561		675.549	1.60539	<0.073695	<0.039653	6.59704	<0.028671	0.69849	1.44659	0.281802	11.3885	3.95284	54.1178	21.8412	111.619	25.077	242.442	47.9281	10379	0.675455	113.932	227.942	0.49983	4.47989	0	0.212257	418.954	417.954	0.170305		-1		2.62113	#NUM!	#VALUE!
DEMSPA-Grain42 - 54	rim	Analysis 1		15.547	0.366218	<5.0534	203.536							0.478095		814.598	1.96104	<0.060369	<0.035498	8.29997	0.0316649	0.763706	1.90508	0.287726	12.1853	4.80946	65.8649	26.4103	131.459	29.6238	280.575	54.6122	10447.3	0.89623	138.372	287.447	0.481383	4.25986	0	0.18257	453.899	452.899	0.148226	456.821	455.821	0.160656	2.656	2.65879	3.95798
DEMSPA-Grain42 - 55	rim	Analysis 2		15.39	0.37276	<5.0783	231.645							0.421477		702.802	1.931	<0.071697	<0.052883	8.45499	0.0339801	0.560069	1.61366	0.225129	10.4378	4.12331	56.1523	22.5326	114.471	25.7371	241.465	47.0799	10353.2	0.940242	138.777	287.035	0.483484	4.30019	0	0.167705	639.085	638.085	0.141498	502.044	501.044	0.14187	2.80488	2.69988	3.92671
DEMSPA-Grain43 - 56	rim	Analysis 1		15.579	0.423563	<4.9917	180.616							0.580558		1024.92	2.2689	<0.070567	<0.031302	11.1443	0.0632287	1.12733	2.56641	0.438621	15.4025	5.78151	79.6016	32.612	170.134	40.0112	396.572	78.9462	10914.3	1.02972	290.88	556.005	0.523161	4.98195	0	0.213282	444.321	443.321	0.169849	299.984	298.984	0.148596	2.64672	2.47565	3.94416
DEMSPA-Grain44 - 58	rim	Analysis 1	apatite avoided	14.691	0.508618	<5.8559	181.244							0.454506		516.265	1.59792	<0.079055	<0.046685	7.53863	0.0288952	0.485291	1.02973	0.265381	7.14292	2.39101	34.8771	15.2541	85.9272	21.5363	238.682	52.0888	9475.79	0.718547	335.068	619.604	0.540777	6.84351	0	0.299153	992.618	991.618	0.232273	452.832	451.832	0.157734	2.99634	2.65498	4.33129
DEMSPA-Grain45 - 60	rim		apatite avoided--short signal	15.029	0.319116	<5.8944	195.687							0.694653		645.376	2.04156	<0.089753	0.584472	12.0577	0.1483	0.95206	1.29645	0.363282	9.37349	3.48112	46.5588	19.6271	110.475	26.9342	287.822	61.0954	10420.7	1.11873	434.29	787.915	0.551188	6.18191	0	0.318595	755.628	754.628	0.217282	158.212	157.212	0.109986	2.87773	2.19649	3.72534
DEMSPA-Grain47 - 63	core/inner part	Analysis 1		14.975	0.260706	<5.0076	308.698							0.429743		1213.4	3.58862	0.108691	0.533789	16.834	0.199359	1.60382	3.04587	0.419076	20.2645	7.1862	97.978	39.246	198.395	44.3489	424.946	81.0523	10615.6	1.64567	406.777	653.967	0.622015	4.33716	0	0.163077	412.182	411.182	0.127943	166.573	165.573	0.0956542	2.61403	2.21899	3.51592
DEMSPA-Grain47 - 64	rim	Analysis 2		14.619	0.31277	<5.557	237.615							0.493263		781.978	2.37431	<0.080068	<0.049042	10.8913	0.0321379	0.706712	1.75093	0.311174	10.9961	4.099	57.7104	23.889	130.182	30.678	305.997	61.9275	10359.4	1.15379	415.21	650.279	0.63851	5.30228	0	0.216808	771.49	770.49	0.174503	591.213	590.213	0.159848	2.88677	2.77101	4.30608
DEMSPA-Grain48 - 65	core/inner part	Analysis 1		15.036	0.437117	<5.1431	236.424							0.469268		1113.15	1.95562	0.240672	<0.053668	9.54751	0.109837	1.67073	3.08875	0.494956	19.848	6.75557	89.5551	36.0871	182.937	41.1427	399.984	77.0336	10559.1	0.896499	232.701	427.457	0.544384	4.46634	0	0.193259	212.511	211.511	0.153968	137.146	136.146	0.134257	2.32533	2.134	3.59014
DEMSPA-Grain48 - 66	core/inner part	Analysis 2		15.351	0.274247	<4.9918	211.758							0.425734		716.848	2.1294	<0.0766	<0.030441	9.07752	<0.02608	0.652587	1.50709	0.301736	10.3528	3.88257	54.3246	22.3428	118.74	27.2524	267.012	53.1267	10210.1	0.991623	196.991	420.141	0.46887	4.91512	0	0.233535	680.595	679.595	0.184991		-1		2.83225	#NUM!	#VALUE!
DEMSPA-Grain49 - 67	rim	Analysis 1, few common-Pb		15.378	0.457702	<5.0116	167.489							0.505443		733.174	1.96785	<0.081296	<0.039425	7.73844	0.0368922	0.791799	1.48949	0.250599	10.8265	4.04441	56.637	23.0652	120.211	27.4297	265.196	51.9604	10437.7	0.946307	115.66	262.364	0.440837	4.68238	0	0.190783	469.79	468.79	0.143496	366.148	365.148	0.136301	2.67098	2.56247	3.85197
FN1-Grain2 - 2	rim			15.31	0.293363	<5.1914	346.452							0.540575		1328.17	3.20368	<0.069841	0.0506127	13.1498	0.085249	1.27837	3.38998	0.479578	21.6734	7.92508	107.349	43.241	215.917	47.7665	452.886	86.178	10402.8	1.43302	344.874	570.587	0.604419	4.21884	0	0.171049	391.879	390.879	0.146035	293.326	292.326	0.143298	2.59204	2.46587	3.82563
FN1-Grain6 - 8	rim		shorter avoid melt	14.764	0.279421	<6.7588	239.42							0.43391		1068.82	4.50315	0.0937101	<0.036052	22.3841	0.0869824	1.08619	1.99777	0.44565	14.8854	5.6809	78.6818	32.708	178.673	42.7678	436.101	89.5246	10361.7	2.03785	825.587	1301.85	0.634163	5.5426	0	0.249841	1190.36	1189.36	0.18287	509.929	508.929	0.131082	3.07531	2.70666	4.17513
FN1-Grain11 - 13	rim		very short avoid apatite and melt	15.732	0.338864	<7.4213	206.742							0.667811		718.319	2.33972	<0.12054	0.37759	10.3508	0.137087	1.06884	1.54159	0.264847	9.73712	3.74854	54.2596	22.5806	117.117	26.9452	271.065	54.1311	10037.8	1.05059	240.731	478.606	0.502984	4.9957	0	0.208987	484.807	483.807	0.142828	143.907	142.907	0.0883635	2.68467	2.15505	3.54298
FN1-Grain12 - 14	rim			15.114	0.30625	<5.0917	223.041							0.571738		1284.21	2.80947	<0.086206	0.0787653	12.0226	0.145561	1.76213	3.21784	0.616596	20.7035	7.29124	100.078	40.555	211.091	48.1335	482.684	96.6559	10126.3	1.16947	345.465	606.784	0.569338	4.82305	0	0.230952	292.853	291.853	0.177981	140.355	139.355	0.134287	2.46516	2.14412	3.61999
FN1-Grain13 - 15	rim		shorter avoid apatite	15.162	0.423764	<5.5539	142.16							0.642108		698.124	1.58707	<0.078205	0.116734	6.77733	0.0687437	0.815865	1.35198	0.418088	10.1713	3.39406	50.0745	20.8075	116.549	30.7841	331.854	72.3293	10560.1	0.840711	220.002	491.995	0.447164	6.62721	0	0.344681	544.102	543.102	0.250829	176.977	175.977	0.147855	2.73488	2.24546	3.85473
FN1-Grain14 - 16	rim		very short	15.374	0.372372	<8.6803	280.242							0.336058		685.209	1.96083	<0.15351	<0.089504	8.77933	0.0600852	0.693201	1.3113	0.18527	11.4877	4.1148	52.7585	21.6113	108.411	23.8985	233.268	45.2668	11163.3	0.920532	141.94	290.562	0.4885	4.42142	0	0.145936	562.855	561.855	0.114596	300.793	299.793	0.0971704	2.74962	2.47682	3.68447
FN1-Grain15 - 17	rim			15.343	0.496204	<5.2571	266.044							0.34908		728.562	2.12557	<0.06439	<0.031457	9.21735	<0.015563	0.516633	1.84625	0.18695	11.5651	4.31671	58.6923	23.3474	118.687	26.1033	251.127	48.0744	10567.9	0.942826	152.782	322.619	0.473569	4.2787	0	0.123689	691.769	690.769	0.1137		-1		2.83933	#NUM!	#VALUE!
FN1-Grain17 - 19	rim	Analysis 1	shorter avoid melt	15.483	0.917101	<7.8033	207.693							<0.28455		404.532	1.29657	<0.11343	<0.053478	4.62614	0.0436488	0.235197	0.899218	0.170596	5.33297	2.18781	29.0633	12.7036	68.3035	16.0166	163.549	33.4798	9838.14	0.668982	65.0777	176.569	0.368568	5.62734	0	0.238164	1029.18	1028.18	0.209902	295.15	294.15	0.136546	3.01207	2.46857	3.60694
FN1-Grain17 - 20	rim	Analysis 2		15.878	0.372998	<5.1931	175.15							0.256563		485.811	1.78724	<0.067225	<0.044162	6.78598	<0.021996	0.30587	0.878813	0.142881	7.05923	2.72837	37.8915	15.7627	81.1922	18.0267	174.355	33.4922	10790.2	0.71658	91.2753	215.637	0.423283	4.60142	0	0.175376	1122.72	1121.72	0.146087		-1		3.04989	#NUM!	#VALUE!
FN1-Grain18 - 21	rim	Analysis 1		15.323	0.30665	<5.0107	276.068							0.561639		879.843	2.65588	<0.088648	0.0387742	10.4802	<0.02692	0.84563	1.86861	0.326169	13.3273	4.95544	69.461	28.1721	145.736	33.5144	319.076	61.2481	10444.6	1.31517	213.036	451.341	0.472006	4.59361	0	0.199819	573.5	572.5	0.15774		-1		2.75778	#NUM!	#VALUE!
FN1-Grain18 - 22	core/inner part	Analysis 2		15.08	0.385261	<5.1092	339.349							0.425539		1412.1	2.04027	<0.064438	<0.0412	10.081	0.102782	1.77465	4.13936	0.509857	25.4962	9.00363	116.932	46.5018	228.057	49.3948	453.643	85.768	10563.5	0.898784	242.006	405.702	0.596511	3.87955	0	0.151729	183.631	182.631	0.129346	160.852	159.852	0.13461	2.26157	2.20372	3.59629
FN1-Grain19 - 24	rim	Analysis 1		14.925	0.313712	<5.0942	216.929							0.439161		705.559	2.10508	<0.069791	<0.043968	8.49874	0.0411647	0.686122	1.7474	0.246023	10.6122	4.04104	53.707	22.404	115.835	27.0619	264.954	52.6376	10238.6	0.84502	148.571	330.082	0.450105	4.93331	0	0.174662	544.349	543.349	0.143814	372.053	371.053	0.128894	2.73508	2.56944	3.9041
FN1-Grain19 - 25	rim	Analysis 2		15.157	0.273335	<5.0863	235.616							0.422435		735.157	2.61838	0.0894886	<0.040793	11.584	0.0404586	0.673054	1.33479	0.359656	9.03325	3.43697	50.6919	21.9492	125.005	31.6844	337.164	71.4244	10143.9	1.21241	425.085	833.125	0.51023	6.65125	0	0.316652	1189.74	1188.74	0.229181	538.868	537.868	0.15948	3.07509	2.73068	4.3137
FN1-Grain20 - 26	core/inner part		shorter avoid melt	15.494	0.319692	<6.025	307.476							0.373868		1010.72	2.41444	0.0910232	<0.030429	10.8005	0.0348	1.05238	2.67101	0.344085	16.0436	5.88394	80.2593	32.5874	166.301	36.5939	345.427	69.128	10224.3	1.25096	207.84	416.863	0.498582	4.30389	0	0.160695	397.274	396.274	0.134821	471.926	470.926	0.152063	2.598	2.67295	4.07841
FN1-Grain21 - 27	rim	Analysis 1	shorter avoid apatite	15.043	0.325915	<8.7387	238.354							0.416099		598.191	1.79021	<0.15188	<0.062313	7.45605	0.0613138	0.418027	0.98617	0.270169	7.77083	2.97529	43.7446	17.3417	97.8179	23.3204	240.292	51.6715	9335.3	0.829289	247.605	496.364	0.498836	5.49307	0	0.298366	1131.38	1130.38	0.230419	309.164	308.164	0.140274	3.05322	2.48878	3.90824
FN1-Grain21 - 28	core/inner part	Analysis 2		14.847	0.392203	<4.9368	249.552							0.417081		803.209	2.211	<0.084021	<0.040571	7.17113	0.0523909	0.625036	2.01677	0.332277	11.9824	4.37137	63.532	25.6369	134.711	30.5822	298.311	58.9188	9705.04	1.00525	123.193	296.463	0.415542	4.69545	0	0.206644	499.259	498.259	0.181412	289.381	288.381	0.157376	2.69746	2.45997	3.75272
FN1-Grain23 - 30	core/inner part	Analysis 1		15.681	0.306991	<5.0061	106.942							0.32846		340.488	1.22597	0.0500343	<0.028964	5.29509	<0.017072	0.279167	0.569899	0.177065	4.31145	1.61761	23.4937	10.324	58.8325	14.9566	160.387	34.7136	9968.35	0.591716	137.225	350.212	0.391834	6.82682	0	0.345338	1401.62	1400.62	0.252698		-1		3.14632	#NUM!	#VALUE!
FN1-Grain23 - 31	rim	Analysis 2, > U	shorter avoid apatite	14.763	0.252796	<6.6275	223.123							0.600328		1219.36	4.75484	<0.12493	0.0563454	24.9368	0.0962273	1.07142	2.58481	0.627806	17.936	6.61299	94.2327	37.7045	205.053	48.2506	499.847	104.638	10326.1	2.09552	1322.8	1709.7	0.773699	5.30439	0	0.281885	1233.74	1232.74	0.225979	530.251	529.251	0.16328	3.09087	2.72366	4.24962
FN1-Grain25 - 33	rim	Analysis 1	shorter avoid apatite	15.04	0.22104	<6.8758	205.32							0.606548		1046.75	3.7966	<0.10637	<0.052301	17.8042	0.0623434	0.963365	1.98491	0.482436	13.5827	5.27511	74.1612	31.7649	178.284	44.6098	468.433	98.4082	9854.21	1.77415	771.62	1226.87	0.628935	6.31642	0	0.284053	1186.37	1185.37	0.209924	546.694	545.694	0.14979	3.07385	2.73695	4.29401
FN1-Grain27 - 36	rim	few common-Pb	shorter avoid melt	15.121	0.378469	<5.2342	246.756							0.543491		735.367	2.33026	0.0819616	<0.031156	9.61348	0.0280913	0.597527	1.93898	0.274408	11.6129	4.46853	58.0344	23.4247	123.069	28.7501	269.768	52.4033	10330.3	1.18586	180.548	386.993	0.46654	4.64842	0	0.176792	652.982	651.982	0.156994	629.875	628.875	0.167918	2.81424	2.79856	4.13913
FN1-Grain28 - 37	rim			15.171	0.313114	<5.1471	283.382							0.462364		739.755	2.03313	0.109487	<0.042987	9.48315	0.0593769	0.626634	1.76231	0.360366	11.075	4.23639	56.4808	23.4098	124.812	28.8271	281.088	55.8019	9857.23	0.914706	258.978	488.946	0.529665	4.97669	0	0.249376	689.629	688.629	0.209916	340.988	339.988	0.169009	2.83799	2.53146	3.91564
FN1-Grain29 - 38	rim			15.162	0.28715	<5.1271	150.532							0.403832		470.165	1.65131	<0.069876	<0.040881	6.28582	<0.026968	0.523507	1.07618	0.23879	5.53646	2.07442	30.5935	13.7066	81.476	21.3697	237.32	52.9679	9817.92	0.809013	175.133	467.293	0.374783	7.75719	0	0.299076	820.274	819.274	0.218298		-1		2.91343	#NUM!	#VALUE!
FN1-Grain31 - 40	rim			16.282	0.273741	<5.1368	192.046							0.270091		847.546	3.78705	<0.060367	<0.039298	11.3239	0.0234294	0.607041	1.45388	0.123718	11.4402	4.67163	64.7935	27.0935	146.26	34.1071	336.054	67.2109	10343.8	1.98633	237.744	573.097	0.41484	5.18655	0	0.0927418	1105.36	1104.36	0.071181	976.444	975.444	0.0719533	3.04311	2.9892	4.38847
FN1-Grain32 - 41	rim	few common-Pb		14.959	0.352733	<5.0702	217.79							0.367379		811.835	2.17128	<0.087274	<0.030642	9.51652	0.0336589	0.831674	2.29238	0.303815	13.3442	4.7799	65.7325	26.0022	131.045	29.2076	268.144	51.0732	10398.5	0.915671	184.036	355.206	0.518112	4.07932	0	0.167936	402.65	401.65	0.146302	458.338	457.338	0.168149	2.60385	2.66024	4.02338
FN1-Grain33 - 42	core/inner part			15.008	0.208461	<5.149	251.99							0.376656		1432.88	4.79137	<0.076218	<0.035583	14.8551	0.0550103	1.2379	2.58871	0.6016	16.4877	6.70382	96.6511	43.7474	243.66	58.6245	601.957	121.959	8782.81	1.54044	447.82	860.476	0.520433	6.22814	0	0.281521	779.382	778.382	0.202914	501.957	500.957	0.169488	2.89119	2.6998	4.19429
FN1-Grain35 - 44	rim	Analysis 1		14.941	0.306854	<5.2035	200.451							0.392954		734.212	2.25278	<0.08479	<0.042083	9.99666	0.0507266	0.737817	1.91289	0.285488	11.1196	4.13138	56.8982	23.2524	122.116	27.5808	264.464	51.7254	10647.2	1.01801	207.986	416.946	0.498832	4.64803	0	0.189244	558.185	557.185	0.157544	363.416	362.416	0.140942	2.746	2.55921	3.91484
FN1-Grain35 - 45	core/inner part	Analysis 2	very short signal	15.551	0.378585	<8.6887	266.53							0.445897		1229.39	2.35428	0.171402	<0.078291	9.61576	0.0856796	1.56614	3.3362	0.440025	22.6473	8.01527	100.572	40.2394	199.448	42.6636	391.12	75.8115	9472.64	0.99513	188.749	360.024	0.524269	3.88898	0	0.154763	205.989	204.989	0.129209	181.548	180.548	0.133681	2.31173	2.25659	3.62345
FN1-Grain36 - 46	rim		La spike avoided	15.183	0.293825	<5.3189	191.856							0.377665		658.89	1.92353	<0.068804	<0.029434	8.30121	<0.031355	0.642009	1.69714	0.228276	9.4028	3.38676	49.1496	20.6452	111.053	25.7342	268.023	52.1934	10250.2	0.836351	203.991	421.876	0.483533	5.45321	0	0.174701	604.871	603.871	0.144253		-1		2.78094	#NUM!	#VALUE!
FN1-Grain38 - 48	rim	Analysis 1		15.674	0.358551	<5.2262	217.752							0.343994		714.946	2.21892	<0.075536	<0.025926	9.52357	0.0235367	0.640924	1.76364	0.261363	10.0874	3.83064	54.5572	22.2617	118.259	27.5722	267.743	53.5618	10269.6	1.02165	273.97	512.178	0.534912	4.90756	0	0.189441	674.058	673.058	0.156918	669.112	668.112	0.161999	2.82805	2.82485	4.33768
FN1-Grain38 - 50	core/inner part	Analysis 3		15.153	0.313295	<5.0089	303.596							0.219484		911.523	2.8156	<0.071795	<0.024723	10.9638	0.0243129	0.831238	1.96137	0.340483	13.8126	5.13843	71.6879	29.2105	150.594	33.8701	322.762	62.4872	10584.1	1.27108	217.452	437.162	0.497418	4.50232	0	0.199987	594.441	593.441	0.161152	749.996	748.996	0.189827	2.77338	2.87448	4.25481
Td-H-Grain3 - 3	rim	Analysis 1		14.749	0.41813	<5.7207	174.894							0.551313		636.363	2.04615	<0.064712	<0.028865	8.9902	0.0322624	0.40216	1.3731	0.183643	9.06107	3.57022	49.3967	19.76	105.138	23.7746	230.749	44.2199	10472	1.00709	134.176	308.244	0.43529	4.67134	0	0.159169	1032.61	1031.61	0.139285	657.253	656.253	0.130174	3.01352	2.81707	3.9802
Td-H-Grain3 - 4	core/inner part	Analysis 2		14.712	0.28141	<5.6673	235.897							0.335392		688.34	1.65736	<0.065976	<0.044469	8.03808	0.0287763	0.586894	1.73348	0.219066	10.9215	4.18948	55.3635	22.3136	111.995	24.7633	231.948	44.3698	10160.5	0.795603	130.286	280.479	0.464514	4.18955	0	0.153921	524.585	523.585	0.133786	517.829	516.829	0.147719	2.71899	2.71335	3.98887
Td-H-Grain4 - 5	rim	Analysis 1		15.078	0.452003	<5.7903	156.415							0.219513		403.896	1.04236	0.0591746	<0.028376	3.955	<0.020611	0.404073	0.822684	0.229799	5.34016	2.01852	28.5717	12.2224	67.5554	16.6392	181.941	38.0379	8739.51	0.46038	77.4291	191.309	0.404734	6.36785	0	0.33518	596.901	595.901	0.249961		-1		2.77517	#NUM!	#VALUE!
Td-H-Grain4 - 6	core/inner part	Analysis 2	shorter avoid apatite	15.172	0.450113	<5.8103	197.726							0.246755		1071.68	1.54806	<0.08024	0.0809529	9.36395	0.0551335	1.18472	2.94024	0.426809	21.6179	7.25108	93.1153	35.6889	169.975	36.0146	328.391	59.8859	10435.2	0.57872	177.675	254.79	0.697339	3.52671	0	0.163666	240.353	239.353	0.146375	286.897	285.897	0.180315	2.37904	2.45621	3.66477
Td-H-Grain5 - 7	rim		shorter avoid La incl.	15.356	0.345711	<8.3906	170.109							0.474749		1301.15	1.26644	0.169939	<0.04405	7.10857	0.191409	3.10334	4.13975	1.05698	24.3762	8.05922	103.582	39.9379	206.498	47.1873	462.066	96.3842	8667.21	0.562251	329.773	512.779	0.64311	4.46088	0	0.321678	78.6523	77.6523	0.240617	44.4405	43.4405	0.182082	1.89015	1.6379	3.42797
Td-H-Grain6 - 8	rim		small La incl.	15.518	0.339325	<5.7028	308.901							0.608547		1675.13	1.6869	0.0842678	0.089631	11.0417	0.188476	3.36124	5.80181	0.760644	34.7885	11.5176	147.092	55.7074	268.569	56.2561	504.107	92.3247	10090.7	0.845846	287.309	422.935	0.67932	3.42716	0	0.163684	86.2286	85.2286	0.134431	79.9551	78.9551	0.142278	1.93059	1.89738	3.35102
Td-H-Grain7 - 9	rim		shorter avoid apatite	14.718	0.718484	<5.7698	205.54							0.358506		549.303	1.78737	<0.04747	0.0457042	7.59925	0.0554229	0.43942	1.16481	0.188055	8.58608	3.091	42.7031	17.9645	92.9245	21.8689	209.271	41.607	10446.4	0.757795	140.735	292.414	0.481287	4.9006	0	0.181795	840.762	839.762	0.151935	331.957	330.957	0.113942	2.92416	2.51977	3.72231
Td-H-Grain8 - 10	rim		shorter avoid melt	14.938	0.312896	<5.8389	138.259							0.502191		521.31	1.5481	0.216251	0.174191	8.41944	0.0537102	0.684191	1.05764	0.247253	6.83646	2.27428	35.9308	15.5829	87.5793	22.6322	249.506	52.4012	10525.8	0.893928	273.351	613.422	0.445616	6.94407	0	0.281112	815.768	814.768	0.196492	267.105	266.105	0.115004	2.91103	2.42505	4.0577
Td-H-Grain11 - 13	rim	Analysis 1		15.484	0.267432	<5.7097	173.509							0.402761		497.048	1.50904	0.0720377	<0.037262	7.16422	0.027348	0.457405	1.145	0.29903	6.14038	2.41461	32.7387	14.5533	83.562	21.6153	235.708	50.1483	9757.66	0.724565	252.203	547.67	0.460502	7.19968	0	0.344776	961.439	960.439	0.268669	453.522	452.522	0.185627	2.98247	2.65564	4.30159
Td-H-Grain11 - 14	rim	Analysis 2		15.455	0.300414	<5.9575	278.725							0.304491		782.882	2.19077	<0.078975	<0.041927	9.97795	0.0264208	0.761537	1.79002	0.296753	12.7659	4.5025	62.0902	25.2202	129.075	28.544	271.226	52.4615	10402.4	1.06826	198.762	393.66	0.504906	4.36827	0	0.189786	546.735	545.735	0.156901	627.807	626.807	0.178708	2.73698	2.79713	4.17317
Td-H-Grain12 - 15	rim			14.925	0.398187	<5.5687	268.86							0.486575		906.698	2.84494	<0.086802	<0.04967	9.73853	0.0315842	0.635046	1.80406	0.301889	13.5116	5.11493	70.9548	28.9269	152.202	34.7238	339.271	66.3809	10415.4	1.39773	175.702	392.03	0.448187	4.7815	0	0.186936	760.162	759.162	0.156732	640.99	639.99	0.159756	2.88033	2.80617	4.09385
Td-H-Grain13 - 16	rim	few common-Pb		15.101	0.43882	<5.67	176.187							0.257891		326.137	0.963095	<0.069045	<0.028454	4.18688	0.0152551	0.299769	0.824258	0.229432	4.71309	1.69231	23.2635	9.67675	54.3945	13.3213	143.217	29.8718	8890.2	0.365822	85.9419	205.486	0.418238	6.15632	0	0.355871	713.753	712.753	0.299099	453.425	452.425	0.240809	2.85294	2.65555	4.12937
Td-H-Grain14 - 17	core/inner part			14.847	0.392029	<5.5727	204.138							0.297666		597.254	1.86006	<0.05309	<0.040255	7.85897	<0.017053	0.518169	1.18828	0.188403	8.69773	3.26397	45.4168	18.5884	98.9551	23.4601	234.776	46.6562	10530.7	0.935392	151.658	347.57	0.436337	5.16936	0	0.179163	795.157	794.157	0.141262		-1		2.89991	#NUM!	#VALUE!
Td-H-Grain15. - 19	rim	Analysis 2		15.116	0.320125	<5.4835	169.812							0.391934		468.159	1.61825	<0.057755	0.0295614	6.3467	<0.018739	0.431242	0.769543	0.21547	5.99096	2.2139	31.3482	13.8439	79.3271	20.1005	214.218	45.7852	10011.4	0.740036	158.673	364.67	0.435113	6.8335	0	0.306793	1064.67	1063.67	0.218748		-1		3.02681	#NUM!	#VALUE!
Td-H-Grain16 - 21	core/inner part	Analysis 2		15.799	0.365693	<5.5986	258.474							0.318454		1176.54	2.06012	<0.057419	<0.03869	11.9861	0.0654943	1.26874	3.67059	0.441665	22.4049	7.89926	100.094	38.0331	188.462	40.0797	363.882	68.1389	10458.4	0.986337	218.192	345.715	0.631131	3.6354	0	0.148894	276.85	275.85	0.13702	303.574	302.574	0.160234	2.44067	2.48083	3.72251
Td-H-Grain17 - 23	rim	Analysis 2		15.286	0.366257	<5.4272	215.597							0.270471		482.761	1.58485	<0.075353	<0.032041	6.30484	<0.02387	0.273042	0.849248	0.211837	7.0868	2.75489	37.0981	15.4946	81.2761	18.3997	180.534	36.9299	10215.2	0.696292	102.546	253.483	0.404547	4.8664	0	0.263987	1248.54	1247.54	0.224771		-1		3.09606	#NUM!	#VALUE!
Td-H-Grain18 - 24	rim			15.387	0.451051	<5.5563	205.056							0.57423		932.803	1.4318	<0.084929	<0.035955	7.70531	0.0408915	1.0525	2.87986	0.415209	16.7283	5.86341	77.315	30.3253	150.066	32.5523	301.347	59.1234	10400.6	0.641161	154.938	276.581	0.560188	3.89765	0	0.182885	233.978	232.978	0.163145	280.758	279.758	0.188798	2.36731	2.44678	3.83019
Td-H-Grain19 - 25	rim			15.65	0.372239	<5.901	256.669							0.425359		919.088	2.8541	<0.069821	0.0289234	9.72561	0.0359562	0.917429	2.11345	0.303972	14.3381	5.4155	72.2721	29.176	153.037	34.1387	330.97	65.0355	9933.36	1.29653	173.256	372.77	0.46478	4.5795	0	0.168817	461.217	460.217	0.136127	452.818	451.818	0.142923	2.66296	2.65496	4.01567
Td-H-Grain23 - 29	rim			15.259	0.365925	<5.4621	194.608							0.356846		504.359	1.56207	<0.061822	<0.031459	7.02948	0.0293457	0.419563	1.14264	0.198695	7.44936	2.71863	37.254	15.3485	82.1831	19.2694	193.925	40.064	11022.6	0.799632	132.907	311.051	0.427284	5.20549	0	0.208208	806.839	805.839	0.175109	461.369	460.369	0.143771	2.90625	2.66311	4.02529
Td-H-Grain25 - 32	rim			15.183	0.267885	<5.6161	209.623							0.568933		993.605	2.16927	0.0630087	<0.024618	9.18162	0.0527247	1.14847	2.37927	0.396528	16.476	5.92704	80.3585	32.4743	164.44	35.6571	336.935	66.2356	10581	0.991386	196.741	359.586	0.547131	4.1929	0	0.19362	318.456	317.456	0.154827	286.882	285.882	0.158519	2.50168	2.45619	3.83379
Td-H-Grain26 - 33	rim	Analysis 1		15.128	0.313171	<5.529	189.968							0.491378		539.589	1.64635	<0.069159	<0.028489	7.62752	0.0379115	0.592102	1.09013	0.281769	7.20511	2.63485	36.0076	15.3831	89.4423	22.345	238.36	51.6618	10333.4	0.799976	262.363	542.936	0.48323	6.61972	0	0.307368	791.228	790.228	0.226551	338.481	337.481	0.150119	2.89775	2.52825	4.15598
Td-H-Grain26 - 34	rim	Analysis 2	shorter avoid apatite	14.92	0.260652	<5.7036	190.265							0.367445		557.121	1.76808	<0.061627	0.0478674	8.712	0.0467424	0.60114	1.11315	0.256959	6.81361	2.64849	37.0536	15.9936	95.1977	24.2199	264.734	59.0506	10839.9	0.934787	302.141	642.397	0.470334	7.14463	0	0.285248	992.037	991.037	0.203246	328.245	327.245	0.118421	2.99609	2.51487	4.13809
Td-H-Grain27 - 36	rim	Analysis 2, few common-Pb	shorter avoid apatite	15.269	0.332357	<6.9682	343.062							0.466275		755.565	2.04494	<0.10095	1.41065	10.5744	0.306683	2.13786	1.96547	0.462705	9.63198	3.58094	52.8621	22.1205	127.644	32.4847	348.969	79.6671	9321.49	0.974243	234.999	535.868	0.438538	6.60151	0	0.325115	286.438	285.438	0.19465	46.9535	45.9535	0.0788379	2.45551	1.66232	3.24237
Td-H-Grain28 - 37	rim	Analysis 1		15.455	0.312651	<5.394	150.333							0.612947		758.276	2.71118	<0.067837	<0.027948	9.06153	0.0379686	0.453685	1.17205	0.234933	8.28527	3.28342	47.9956	22.0598	129.857	33.7577	369.704	80.9281	10511.6	1.43535	245.329	669.414	0.366482	7.70287	0	0.230484	1679.16	1678.16	0.173575	563.444	562.444	0.107572	3.22483	2.75008	4.24627
Td-H-Grain28 - 38	core/inner part	Analysis 2		16.045	0.476885	<5.5131	305.019							0.41148		1085.91	1.57664	<0.064066	<0.032569	9.60999	0.107551	2.03069	3.66344	0.702345	21.8536	7.39772	94.2151	34.6879	170.764	35.8601	325.251	62.0232	9703.73	0.672255	220.164	299.44	0.735254	3.45222	0	0.239976	127.829	126.829	0.198351	119.222	118.222	0.206236	2.10322	2.0727	3.4447
Td-H-Grain29 - 40	rim	Analysis 1		14.966	0.300311	<5.535	115.898							0.321373		446.748	1.50764	0.0768117	<0.037339	6.31963	0.0398415	0.303798	0.958062	0.264618	5.54606	2.08972	29.7656	12.7146	73.8799	18.8279	205.233	45.6099	9835.93	0.705264	190.485	446.257	0.426851	6.89499	0	0.350957	1310.96	1309.96	0.29367	356.547	355.547	0.166819	3.11726	2.5509	4.04925
Td-H-Grain30 - 42	rim	Analysis 1		15.353	0.293695	<5.3407	149.64							0.393196		953.163	1.46961	<0.057651	0.0662669	7.79798	0.0922837	1.49038	2.72658	0.532757	16.4291	5.74359	75.9069	30.1566	155.569	36.5161	354.74	71.0244	10170.9	0.625194	256.419	422.905	0.606329	4.67335	0	0.243353	201.904	200.904	0.191327	125.412	124.412	0.158632	2.30299	2.09486	3.66112
Td-H-Grain30 - 43	rim	Analysis 2		15.17	0.404958	<5.4828	198.343							0.383808		1240.77	1.73536	0.0730195	<0.036372	9.7542	0.0600447	1.52973	3.60977	0.583333	23.0679	8.19803	105.456	40.7616	199.037	42.9719	394.242	73.8075	10646.5	0.772966	199.563	335.065	0.595596	3.73844	0	0.195433	201.026	200.026	0.168047	247.303	246.303	0.201452	2.30109	2.39147	3.74665
Td-H-Grain32 - 45	core/inner part	Analysis 1		14.904	0.39284	<5.4941	207.148							0.518572		564.493	1.78838	<0.06674	<0.018326	7.18467	0.0338458	0.381696	1.23503	0.195469	8.64469	3.32834	44.726	18.1345	92.3063	20.8994	194.864	37.1603	10273.7	0.716694	101.283	215.141	0.470773	4.35684	0	0.182889	808.807	807.807	0.160801	506.756	505.756	0.152302	2.90731	2.70394	3.80322
Td-H-Grain32 - 46	core/inner part	Analysis 2		15.039	0.326814	<5.3619	287.409							0.485016		1028.07	2.50094	<0.076928	<0.023957	9.71627	0.07204	0.905712	2.56488	0.333896	17.2687	6.26446	83.3069	32.9356	168.733	36.9433	346.301	67.7037	9872.06	1.01589	163.209	317.124	0.514654	4.15693	0	0.153381	409.79	408.79	0.13443	272.653	271.653	0.126428	2.6115	2.43401	3.64366
Td-H-Grain33 - 47	rim	few common-Pb	shorter avoid melt	14.75	0.325635	<6.3626	203.402							0.812148		1277.44	1.62922	<0.073571	<0.034911	8.93278	0.16116	2.44451	4.05067	0.850607	20.705	7.18996	95.591	39.1062	208.118	50.6605	515.831	108.562	9418.58	0.792584	477.681	755.87	0.631962	5.39623	0	0.283957	148.511	147.511	0.215546	72.2048	71.2048	0.149971	2.16882	1.85251	3.67119
Td-H-Grain33 - 48	core/inner part	Analysis 2		14.826	0.332684	<5.3136	288.819							0.541361		1249.74	3.69121	0.104676	<0.027585	13.0043	0.0655654	1.30061	3.05447	0.462945	19.3756	7.23634	99.1397	39.8216	208.15	45.7828	436.504	84.5901	10211.6	1.63437	264.232	523.903	0.504352	4.40292	0	0.183975	410.379	409.379	0.149443	345.569	344.569	0.149515	2.61213	2.53728	3.90258
Td-H-Grain34 - 49	core/inner part	Analysis 1		15.14	0.333119	<5.4288	362.515							0.439165		1261.68	1.90401	<0.082302	<0.028294	9.46731	0.0902104	1.56267	3.69451	0.464872	22.989	7.86014	104.416	40.8697	200.9	43.3097	402.936	76.2166	10153.7	0.864999	202.128	347.577	0.581534	3.85895	0	0.154212	194.123	193.123	0.133113	170.725	169.725	0.13834	2.28583	2.22975	3.58579
Td-H-Grain37 - 53	rim	Analysis 1		15.286	0.352589	<5.4529	183.709							0.304651		613.947	1.79752	<0.071122	<0.043224	7.64393	<0.02133	0.625962	1.51447	0.234258	8.80984	3.30454	45.5703	19.1536	101.062	24.0827	247.891	50.598	9829.59	0.832081	161.258	365.868	0.440754	5.43975	0	0.196067	586.577	585.577	0.157552		-1		2.76758	#NUM!	#VALUE!
Td-H-Grain39 - 57	rim	Analysis 2		15.7	0.418174	<5.3024	227.497							0.555921		730.57	2.17063	<0.074986	0.0433547	7.57521	0.0416778	0.446723	1.61582	0.224958	10.4689	4.05212	56.1752	23.2276	120.226	27.5195	267.652	52.873	10100.5	1.10164	124.793	294.416	0.423865	4.76459	0	0.167216	788.059	787.059	0.1491	438.505	437.505	0.130631	2.89601	2.64098	3.84906
Td-H-Grain41 - 59	core/inner part			14.928	0.405149	<5.2859	212.3							0.244842		822.604	2.44312	<0.067321	0.0195625	8.27719	0.0356066	0.609504	1.87473	0.290576	11.6893	4.40028	63.4752	25.6709	136.82	32.1793	316.798	63.9138	10114.4	1.37745	136.104	329.721	0.412784	4.99089	0	0.189767	658.25	657.25	0.161681	462.777	461.777	0.148009	2.81773	2.66443	3.96662
Td-H-Grain42 - 60	rim			14.985	0.477106	<5.3229	238.59							0.409334		1395.26	1.41432	<0.063935	0.0241076	9.82267	0.106244	2.38663	5.37937	0.826103	31.2706	10.0776	126.618	47.3111	223.524	45.8287	412.747	74.3955	9845.92	0.613531	205.773	280.736	0.732976	3.25978	0	0.194726	96.2704	95.2704	0.176092	124.147	123.147	0.218167	1.97896	2.09042	3.42199
DEMNE1chage - 2				15.495	0.362321	<6.1816	272.166							0.430322		1109.29	2.32998	<0.097275	<0.040614	8.67341	0.0531735	1.20015	2.97854	0.392	18.3065	6.70532	89.4214	35.1603	178.968	38.8201	367.937	70.3105	10326.7	1.13217	166.409	324.547	0.512741	4.11464	0	0.162295	259.923	258.923	0.137222	265.099	264.099	0.149746	2.41317	2.42177	3.78558
DEMNE1chage - 3				15.41	0.408915	<6.243	174.67							0.278316		744.434	1.7108	0.0966243	0.0555485	6.42867	<0.04019	0.900698	1.64707	0.281606	12.0098	4.27986	59.2045	23.5278	121.75	27.4338	264.954	52.8193	10021.7	0.723952	118.013	248.909	0.47412	4.47524	0	0.193571	314.128	313.128	0.148606		-1		2.49572	#NUM!	#VALUE!
DEMNE1chage - 5				15.601	0.481557	<5.864	194.465							<0.16439		736.178	1.49491	<0.098758	0.0422705	6.75794	0.0496733	0.581123	1.72113	0.237166	11.3973	4.39306	57.1493	23.2042	120.854	26.5314	260.245	50.8908	10198.7	0.748918	111.572	243.08	0.458992	4.55377	0	0.163708	488.985	487.985	0.14155	290.709	289.709	0.126051	2.68841	2.46196	3.68963
DEMNE1chage - 9				15.176	0.315537	<6.0486	210.765							0.602665		1624.25	2.00844	<0.062176	<0.025058	12.2808	0.112017	1.78545	4.95385	0.732641	31.1955	10.6178	139.751	53.7747	261.754	56.0951	507.122	93.9441	10828.5	0.901124	298.245	456.838	0.652847	3.62876	0	0.180176	205.983	204.983	0.164176	192.737	191.737	0.181642	2.31172	2.28271	3.61048
DEMNE1chage - 10				15.068	0.381585	<5.8723	252.42							0.547213		855.66	2.28847	<0.075285	<0.06576	9.64045	0.0373456	0.849589	1.73293	0.299744	14.0458	5.15582	70.2445	27.7216	142.599	31.1051	293.288	56.0683	10693	1.04361	193.156	379.85	0.508506	4.17524	0	0.185742	497.073	496.073	0.146193	472.512	471.512	0.157586	2.69555	2.67349	4.00737
DEMNE1chage - 13				15.293	0.395089	<5.88	305.32							0.412662		783.307	1.90514	<0.080158	<0.062708	7.58828	0.0271259	0.514609	1.58249	0.255827	11.2361	4.31486	60.4046	24.6029	129.517	29.7559	288.526	58.4166	10909.8	0.904667	152.048	341.326	0.445464	4.77656	0	0.185477	733.375	732.375	0.157835	584.156	583.156	0.155524	2.86473	2.76578	4.09979
DEMNE1chage - 16				16.211	0.414358	<6.1036	207.212							0.47411		737.059	2.22732	0.145773	<0.055702	8.51552	0.0554667	0.630896	1.39715	0.257824	10.2676	4.05911	54.6582	23.177	123.732	29.0772	294.132	61.5331	10477.1	1.04665	181.584	400.93	0.452907	5.3813	0	0.208109	760.324	759.324	0.159498	327.058	326.058	0.116659	2.88043	2.51329	3.85904
DEMNE1chage - 17				15.175	0.3941	<5.9035	198.817							0.399854		1544.77	1.68195	<0.064008	0.0387256	9.90177	0.12517	2.42524	5.02199	0.910402	29.2635	10.0437	130.4	50.4593	248.228	54.7429	508.515	96.5533	10116.4	0.772243	307.102	484.964	0.633247	3.89966	0	0.229592	124.912	123.912	0.19251	113.444	112.444	0.197	2.09312	2.05094	3.58821
DEMNE1chage - 19				15.109	0.43478	<6.0018	271.479							0.311848		853.618	2.36856	0.110174	<0.03993	8.35789	<0.033848	0.514761	1.81851	0.311052	12.528	4.70276	66.9987	27.0342	143.864	32.5922	316.629	63.1471	10455.9	1.12015	145.692	342.724	0.4251	4.72589	0	0.199231	779.27	778.27	0.177292		-1		2.89113	#NUM!	#VALUE!
DEMNE1chage - 4				15.64	0.32203	7.09776	160.611							0.595364		722.327	1.31953	<0.097203	<0.057877	6.58727	0.0464397	0.948192	1.82664	0.443595	9.9664	3.62301	51.2724	21.5848	119.66	29.8588	315.288	68.0282	10239.3	0.693497	220.043	462.586	0.47568	6.14927	0	0.317845	366.835	365.835	0.23896	203.276	202.276	0.173596	2.56328	2.30594	3.9983
DEMNE1chage - 6				15.373	0.315934	5.7943	168.397							0.302641		466.237	1.58855	<0.082738	<0.049435	5.92317	0.0282929	0.348701	0.98562	0.222932	4.92294	1.99214	29.688	13.224	77.6333	20.4598	232.132	50.5564	9917.66	0.747675	159.692	411.111	0.388441	7.81905	0	0.309406	1214.61	1213.61	0.239151	413.034	412.034	0.142823	3.08408	2.61493	4.16228
DEMNE1chage - 8			shorter avoid apatite	15.078	0.442194	<6.3755	190.47							0.329184		449.025	1.37609	<0.14673	<0.047459	5.53813	<0.028901	0.288586	0.575256	0.175294	6.35314	2.47354	33.4243	13.6774	73.8696	17.3239	175.536	34.7028	10932.1	0.618765	80.1552	208.268	0.384867	5.25175	0	0.280328	1286.32	1285.32	0.208432		-1		3.10901	#NUM!	#VALUE!
DEMNE1chage - 15			shorter avoid apatite	14.878	0.367817	<6.0648	116.353							0.428907		935.924	1.251	<0.084748	<0.043456	6.85174	0.0834466	1.53527	2.80706	0.707637	14.5952	5.41599	71.5942	28.4025	151.975	36.0722	369.805	74.9029	10065.4	0.564239	228.695	423.071	0.540559	5.16529	0	0.33799	181.417	180.417	0.25892	111.765	110.765	0.204946	2.25628	2.0444	3.705
DEMNE1chage - 18			shorter avoid melt	14.966	0.408865	<6.0608	243.874							0.26227		857.324	2.40984	<0.11985	<0.035289	8.58735	<0.030843	0.698909	1.9191	0.248494	13.0124	4.98118	67.2544	27.3247	142.84	32.2386	309.468	60.1854	10745.3	1.30684	129.423	290.22	0.445949	4.60146	0	0.152024	547.483	546.483	0.127417		-1		2.73758	#NUM!	#VALUE!
Td-H_CA-Grain1 - 1	rim	Analysis 1		14.937	0.313421	b.d.l.	463.6						n.d.	0.321613	n.d.	1074.09	2.59084	0.126683	b.d.l.	8.46556	0.0661898	0.737601	2.58204	0.355627	16.6017	6.14718	82.0818	33.8132	176.555	38.751	369.456	74.3112	10836.1	1.13216	184.956	411.68	0.449271	4.50107		0.166058	474.452	473.452	0.151404	283.634	282.634	0.135896	2.67528	2.45123	3.79377
Td-H_CA-Grain1 - 2	rim	Analysis 2		15.021	0.385597	b.d.l.	174.474						n.d.	0.345323	n.d.	775.059	1.61632	b.d.l.	b.d.l.	7.43184	0.0461468	0.856209	1.6206	0.285943	12.7712	4.60328	62.4369	25.0186	127.804	28.1377	268.093	53.6206	10896.4	0.85544	132.023	270.018	0.488941	4.29382		0.192153	382.372	381.372	0.149027	285.294	284.294	0.140915	2.58135	2.45377	3.76725
Td-H_CA-Grain2 - 3	rim			15.211	0.384945	b.d.l.	236.181						n.d.	b.d.l.	n.d.	816.138	2.5676	0.0869817	0.0435619	10.3749	b.d.l.	0.579867	1.84705	0.25811	11.3452	4.59106	62.7927	25.7358	134.79	30.3656	294.176	58.5512	11051.5	1.24274	199.117	428.525	0.464656	4.68487		0.172379	818.507	817.507	0.146824		-1		2.91249	#NUM!	#VALUE!
Td-H_CA-Grain4 - 5	rim		shorter avoid apatite	15.345	0.464031	b.d.l.	334.953						n.d.	0.386614	n.d.	860.383	1.93322	b.d.l.	b.d.l.	7.10877	0.0281301	0.593622	2.10493	0.250707	12.3297	4.91408	67.5017	27.2095	139.799	30.0535	287.651	57.2585	10605.7	0.819271	101.176	220.712	0.458408	4.26138		0.150451	484.921	483.921	0.134031	485.244	484.244	0.14746	2.68477	2.68506	3.89466
Td-H_CA-Grain5 - 6	rim	Analysis 1		14.931	0.40417	b.d.l.	197.223						n.d.	0.285584	n.d.	970.474	3.28641	b.d.l.	0.043921	10.4035	0.0546505	0.903318	1.75618	0.433786	13.0284	4.70852	69.2456	29.8597	165.487	38.8468	393.757	83.1604	9984.73	1.3006	232.147	503.999	0.46061	5.68638		0.277248	701.879	700.879	0.205469	362.287	361.287	0.156838	2.84564	2.55785	3.96484
Td-H_CA-Grain5 - 7	rim	Analysis 2		14.691	0.43101	b.d.l.	271.518						n.d.	0.453853	n.d.	861.47	1.69673	b.d.l.	b.d.l.	7.04736	0.0673896	0.650253	1.71761	0.370915	13.8664	5.02002	66.2836	27.0856	141.798	31.9031	319.095	66.1072	10261.6	0.797956	161.5	339.749	0.475352	4.81409		0.232356	525.198	524.198	0.196606	237.391	236.391	0.152741	2.71949	2.37363	3.70257
Td-H_CA-Grain6 - 9	rim	Analysis 2		15.266	0.27331	b.d.l.	168.58						n.d.	0.68721	n.d.	958.485	3.56816	b.d.l.	b.d.l.	15.7055	0.0572224	0.828358	1.89834	0.381552	11.8352	4.62455	65.491	28.3158	162.409	40.3576	428.351	94.8226	10410.5	1.53042	554.488	1026.16	0.540351	6.54061		0.246095	1230.01	1229.01	0.186097	515.504	514.504	0.124329	3.08955	2.71139	4.25365
Td-H_CA-Grain7 - 11	rim	Analysis 2		14.82	0.32675	b.d.l.	290.438						n.d.	0.335589	n.d.	752.529	2.14744	b.d.l.	b.d.l.	8.40428	b.d.l.	0.536901	1.68193	0.237141	11.6389	4.22676	59.0488	23.5645	122.64	27.1547	254.626	51.0358	10778.5	1.02656	147.329	316.034	0.466181	4.31213		0.163859	666.986	665.986	0.14476		-1		2.82347	#NUM!	#VALUE!
Td-H_CA-Grain7 - 12	core/inner part	Analysis 3	shorter avoid melt	15.154	0.502956	b.d.l.	221.57						n.d.	0.261671	n.d.	785.256	2.25458	b.d.l.	b.d.l.	8.73942	b.d.l.	0.691051	1.99068	0.330011	12.2821	4.76068	60.7483	25.1706	129.233	26.9461	256.935	52.8094	10113.6	0.972362	163.32	317.835	0.513851	4.22951		0.20404	484.77	483.77	0.176338		-1		2.68464	#NUM!	#VALUE!
Td-H_CA-Grain8 - 13	rim			15.474	0.371624	b.d.l.	248.062						n.d.	0.475694	n.d.	1216.24	2.37087	b.d.l.	b.d.l.	11.8339	0.129778	2.1065	3.86081	0.585158	21.9824	7.63888	102.342	39.0064	193.152	40.8013	373.591	73.1556	9931.31	1.09663	340.575	505.951	0.673137	3.65042		0.194187	169.341	168.341	0.1562	129.424	128.424	0.147844	2.22619	2.10865	3.59091
Td-H_CA-Grain9 - 14	core/inner part	Analysis 1		14.873	0.371624	b.d.l.	275.514						n.d.	0.218463	n.d.	976.401	3.04972	b.d.l.	b.d.l.	11.8365	0.0596457	0.787888	2.17422	0.364576	15.5197	5.97158	78.4883	31.1936	156.794	34.1402	321.245	61.6936	10611.2	1.24815	323.277	519.142	0.622714	4.09291		0.191875	602.438	601.438	0.163666	422.48	421.48	0.160192	2.77919	2.62478	3.93971
Td-H_CA-Grain10 - 16	core/inner part		shorter avoid apatite	15.043	0.371799	b.d.l.	225.487						n.d.	0.24182	n.d.	1417.85	2.08746	0.230599	b.d.l.	11.5339	0.0878511	2.03642	4.34022	0.61753	26.8206	9.40392	121.205	47.0765	228.201	48.9188	436.453	84.4218	10851.1	0.99375	263.415	428.206	0.615159	3.60096		0.174981	171.217	170.217	0.147292	189.517	188.517	0.166488	2.231	2.27535	3.68791
Td-H_CA-Grain11 - 17	rim			14.807	0.37143	b.d.l.	179.385						n.d.	0.281813	n.d.	885.497	1.42388	b.d.l.	0.0469316	7.01912	0.086235	1.28687	2.3377	0.595291	12.9834	4.65412	63.8676	25.9077	140.827	34.3986	366.968	80.1233	9837.03	0.661653	281.58	526.925	0.534383	5.74577		0.330343	261.015	260.015	0.250368	116.495	115.495	0.166422	2.415	2.06256	3.78607
Td-H_CA-Grain12 - 18	rim			14.859	0.365573	b.d.l.	261.535						n.d.	0.252867	n.d.	1115.48	2.67045	b.d.l.	b.d.l.	10.5602	0.088365	1.21408	2.73211	0.339844	18.6777	6.60026	88.4998	35.3963	181.051	39.2007	365.381	72.3165	10831.4	1.1263	213.302	377.528	0.564997	4.12861		0.145443	331.939	330.939	0.1204	218.37	217.37	0.110044	2.51975	2.3372	3.63067
Td-H_CA-Grain14 - 20	rim		shorter avoid apatite	14.947	0.411288	b.d.l.	240.172						n.d.	0.666187	n.d.	957.203	3.23104	b.d.l.	b.d.l.	9.24227	b.d.l.	0.418302	2.09696	0.266622	12.3757	5.0764	71.8984	30.9047	159.763	36.4068	357.203	70.6706	10671.9	1.41614	153.918	362.856	0.424185	4.96817		0.160007	1086.01	1085.01	0.150984		-1		3.03543	#NUM!	#VALUE!
Td-H_CA-Grain17 - 23	rim	Analysis 1		14.603	0.333266	b.d.l.	246.684						n.d.	0.457306	n.d.	1135.36	1.5622	0.0686462	0.0384789	8.5107	0.0501195	1.09081	3.4495	0.452853	21.28	7.51765	95.35	37.7963	180.299	38.6136	349.141	66.261	10411.8	0.637167	168.737	302.351	0.558081	3.66168		0.161591	233.759	232.759	0.151585	285.622	284.622	0.185953	2.36691	2.45427	3.78051
Td-H_CA-Grain17 - 24	core/inner part	Analysis 2	shorter avoid apatite, La	14.8	0.405041	b.d.l.	222.504						n.d.	0.445432	n.d.	870.267	2.63742	0.0944513	b.d.l.	8.94628	b.d.l.	0.711319	1.82598	0.224237	14.2651	5.26823	69.4729	27.4402	142.613	30.9937	296.404	58.9861	10190.8	1.17901	135.643	292.474	0.463779	4.26648		0.134321	540.579	539.579	0.113325		-1		2.73206	#NUM!	#VALUE!
Td-H_CA-Grain19 - 27	core/inner part		shorter avoid high La	14.991	0.345435	b.d.l.	178.555						n.d.	0.418229	n.d.	972.695	3.0687	0.153982	b.d.l.	11.1573	0.0392643	0.742225	2.14541	0.361058	14.603	5.33814	71.8606	29.7244	157.411	35.0723	343.626	69.5668	9991.44	1.31206	231.686	473.899	0.488892	4.78184		0.197208	675.495	674.495	0.169977	539.122	538.122	0.165103	2.82898	2.73088	4.08169
Td-H_CA-Grain20 - 28	rim			15.301	0.463286	b.d.l.	126.819						n.d.	0.4716	n.d.	723.683	1.15421	b.d.l.	b.d.l.	5.61131	0.0697493	1.19822	1.96207	0.448887	10.8619	3.90388	52.737	21.9256	117.401	28.5041	291.404	61.7254	10043.7	0.521485	188.702	361.54	0.521941	5.52561		0.29727	213.69	212.69	0.219502	110.44	109.44	0.157421	2.32775	2.03918	3.71462
Td-H_CA-Grain21 - 29	rim			14.757	0.391904	b.d.l.	157.202						n.d.	0.501607	n.d.	775.005	1.42458	b.d.l.	0.14414	7.31418	b.d.l.	1.25519	1.87041	0.438111	9.91295	3.72669	52.7605	22.8361	129.267	31.7794	335.652	76.5418	9923.22	0.567389	240.211	518.799	0.463014	6.36181		0.311055	330.929	329.929	0.213583		-1		2.51842	#NUM!	#VALUE!
Td-H_CA-Grain22 - 30	rim	Analysis 1		14.327	0.28015	b.d.l.	179.331						n.d.	0.304336	n.d.	971.364	2.77434	b.d.l.	0.0795289	12.8222	0.0492725	0.693866	1.58678	0.532465	12.3829	4.70752	67.012	28.9119	161.144	40.0368	425.397	92.7539	9212.25	1.17089	440.141	769.924	0.571668	6.34807		0.367236	1288.72	1287.72	0.279373	552.885	551.885	0.195024	3.10982	2.74185	4.19384
Td-H_CA-Grain24 - 32	rim		shorter avoid apatite	14.682	0.313131	b.d.l.	136.594						n.d.	0.471494	n.d.	603.062	1.96325	b.d.l.	b.d.l.	7.17282	0.0367973	0.479119	1.02682	0.262906	6.78578	2.65803	37.7735	16.9038	101.576	26.4751	295.228	67.7876	9880.43	0.980833	188.674	499.424	0.377783	7.81574		0.304493	1197.59	1196.59	0.22133	382.179	381.179	0.126774	3.07795	2.58113	4.13265
Td-H_CA-Grain25 - 34	core/inner part	Analysis 2		14.751	0.247233	b.d.l.	158.241						n.d.	0.80882	n.d.	1726.37	2.09761	b.d.l.	b.d.l.	14.4645	0.13808	2.4142	4.73984	0.861157	27.2284	9.63331	129.105	52.5978	281.87	66.9264	680.762	138.988	11074.5	1.27441	688.198	1204.98	0.571126	5.27295		0.231746	257.688	256.688	0.182283	154.964	153.964	0.144852	2.40941	2.18742	3.94085
Td-H_CA-Grain26 - 35	rim		little higher La	14.955	0.299685	b.d.l.	174.884						n.d.	0.283745	n.d.	805.466	2.80736	b.d.l.	0.212091	9.9096	0.0703209	0.536493	1.28657	0.307627	8.1057	3.27925	49.7282	22.9084	138.234	35.9867	400.426	90.4707	10046.5	1.3781	271.77	728.905	0.372847	8.05228		0.291229	1617.5	1616.5	0.210746	343.358	342.358	0.105347	3.20857	2.53448	4.01559
Td-H_CA-Grain27 - 36	core/inner part	Analysis 1		14.934	0.358661	b.d.l.	277.489						n.d.	0.503042	n.d.	1258.77	4.61278	b.d.l.	b.d.l.	14.1435	0.0391108	0.969617	2.28918	0.354156	17.9688	6.71333	94.3279	39.3899	205.255	46.8109	457.54	91.0099	10340.4	1.79947	268.841	575.826	0.466878	4.85052		0.168818	761.429	760.429	0.134038	691.925	690.925	0.137675	2.88106	2.83943	4.16799
Td-H_CA-Grain27 - 37	core/inner part	Analysis 2	shorter avoid apatite, La	15.171	0.365055	b.d.l.	216.801						n.d.	0.22555	n.d.	951.938	2.83776	b.d.l.	b.d.l.	12.3002	0.0589739	0.835808	2.3585	0.406852	15.6547	5.30571	74.7487	29.581	154.208	34.3336	330.415	63.1507	10780.2	1.34932	275.626	548.383	0.502616	4.42035		0.204701	582.042	581.042	0.18047	408.741	407.741	0.171491	2.76421	2.61038	3.96842
Td-H_CA-Grain28 - 38	rim			14.716	0.477294	b.d.l.	146.321						n.d.	0.331564	n.d.	582.554	1.4254	b.d.l.	b.d.l.	5.42991	0.0372171	0.53547	1.10491	0.19873	8.06933	2.95833	40.4648	17.8512	96.918	23.2462	243.864	52.6459	10099.3	0.70476	114.11	286.524	0.398256	6.02657		0.203472	607.275	606.275	0.154948	275.577	274.577	0.110093	2.78267	2.43866	3.88642
Td-H_CA-Grain29 - 39	rim	Analysis 1		15.092	0.286946	b.d.l.	169.623						n.d.	0.345246	n.d.	656.219	2.21233	b.d.l.	b.d.l.	7.56984	0.0299359	0.439972	1.13186	0.275783	7.17061	2.82237	42.2859	18.9291	112.777	29.0924	318.889	71.7973	10166.2	1.04382	202.676	520.532	0.389362	7.54125		0.295948	1370.08	1369.08	0.223267	524.229	523.229	0.141692	3.13643	2.71869	4.24026
Td-H_CA-Grain29 - 40	rim	Analysis 2	little higher La	15.152	0.371892	b.d.l.	183.08						n.d.	0.347742	n.d.	569.69	1.70029	0.15796	0.0325935	6.58098	0.027369	0.50758	0.841668	0.220176	6.31431	2.51235	36.7242	16.7576	96.6948	24.7933	269.961	60.0856	10276.6	0.84405	168.166	433.043	0.388336	7.35103		0.291984	1094.86	1093.86	0.194846	451.371	450.371	0.125906	3.03896	2.65357	4.19927
Td-H_CA-Grain30 - 41	rim			15.692	0.652865	b.d.l.	182.981						n.d.	0.368509	n.d.	593.375	1.4328	b.d.l.	b.d.l.	6.20336	b.d.l.	0.327763	1.33033	0.217868	7.81934	3.19673	43.863	18.5476	97.8351	22.4545	225.189	45.493	10318.9	0.707529	99.4639	241.358	0.412101	5.13392		0.206515	927.312	926.312	0.185648		-1		2.96676	#NUM!	#VALUE!
Td-H_CA-Grain31 - 42	core/inner part			15.118	0.54875	b.d.l.	222.103						n.d.	0.295145	n.d.	704.125	1.95554	b.d.l.	0.0755592	8.31289	0.0393306	0.629769	1.18803	0.259043	10.8235	4.08885	55.0731	22.1708	116.569	26.1535	250.288	49.0944	10722.6	0.898954	128.732	279.036	0.461343	4.54466		0.22085	682.626	681.626	0.166633	443.117	442.117	0.152683	2.83355	2.64554	3.85093
Td-H_CA-Grain32 - 43	core/inner part			15.347	0.326261	b.d.l.	261.816						n.d.	0.484899	n.d.	1507.6	1.68724	b.d.l.	b.d.l.	10.9926	0.104408	2.12753	5.08308	0.788215	29.386	10.2087	127.237	49.7186	240.832	50.3862	462.122	87.6969	10441.5	0.784286	264.708	409.104	0.647044	3.63196		0.197167	143.524	142.524	0.173877	153.05	152.05	0.194931	2.15389	2.18199	3.5931
Td-H_CA-Grain33 - 44	rim			15.364	0.40508	b.d.l.	227.828						n.d.	0.483246	n.d.	782.091	2.36628	b.d.l.	b.d.l.	8.29682	b.d.l.	0.539862	1.5476	0.229739	10.911	4.48617	59.5315	24.6095	128.79	28.8267	275.49	54.7742	10620.1	1.15391	120.601	269.348	0.44775	4.62764		0.170922	742.941	741.941	0.141044		-1		2.87037	#NUM!	#VALUE!
Td-H_CA-Grain34 - 45	rim			14.793	0.365387	b.d.l.	210.329						n.d.	0.367498	n.d.	1098.82	2.01937	b.d.l.	b.d.l.	10.1157	0.0466032	1.13374	2.51914	0.493508	18.542	6.54658	86.7903	35.4218	177.673	39.6323	368.152	72.9623	10671.6	1.01739	221.852	415.12	0.534428	4.24185		0.220756	359.907	358.907	0.181719	361.825	360.825	0.195521	2.55498	2.5573	3.94976
Td-H_CA-Grain36 - 47	rim			14.83	0.358667	b.d.l.	163.593						n.d.	0.415703	n.d.	1007.55	1.41966	b.d.l.	b.d.l.	8.36637	0.0663346	1.44823	2.82576	0.678071	16.6358	5.85816	78.2964	31.3054	165.057	38.4596	391.518	80.2187	10110.3	0.6703	277.956	500.421	0.555444	5.00047		0.302349	237.873	236.873	0.239483	175.529	174.529	0.206984	2.37452	2.24187	3.87759
Td-H_CA-Grain38 - 49	rim			14.871	0.339624	b.d.l.	182.85						n.d.	0.382576	n.d.	742.938	1.84195	b.d.l.	b.d.l.	6.96647	0.0407966	0.829334	1.73514	0.292379	10.4654	3.89315	53.1026	22.5376	125.159	29.3607	306.936	65.1623	9746.03	0.867435	144.971	347.308	0.417413	5.78005		0.209761	435.61	434.61	0.16152	268.443	267.443	0.127822	2.6381	2.42723	3.93009
Td-H_CA-Grain22 - 50	core/inner part	Analysis 2		14.727	0.319355	b.d.l.	130.625						n.d.	0.621666	n.d.	1150.22	1.68259	b.d.l.	0.0580824	8.97593	0.131464	2.01387	3.91304	0.865032	18.2346	6.55487	85.5822	34.8205	186.171	44.3029	455.667	95.1279	9364.67	0.731446	350.234	598.049	0.585627	5.32432		0.313077	170.58	169.58	0.247349	89.5162	88.5162	0.179264	2.22937	1.94702	3.65793
Harsány ignimbrite unit
LR-01_Td-Agch - 4	rim		ok	14.05		<3.2089	305.474						0.368539		476406	1400.2	9.58085	<0.098815	<0.028208	8.36422	0.0169059	0.537018	1.99734	0.230578	17.5797	7.5779	111.202	47.2364	247.156	55.6006	519.885	102.105	10959.1	3.68962	126.052	461.199	0.273313	4.67513	43.4711	0.118962	992.608	991.608	0.0994755	502.235	501.235	0.0901722	2.99634	2.70004	4.43585
LR-01_Td-Agch - 7	rim		ok	14.61		<3.1318	501.875	2.88681	681.365	33.6494	668.824	696.635	0.586173		469204	1967.52	11.5206	<0.11343	<0.031768	15.2425	0.0573309	0.913093	3.30992	0.347375	28.4201	11.509	163.909	66.3857	330.383	72.4602	665.236	120.979	10627.2	4.45522	346.396	979.178	0.353762	4.05856	44.151	0.109496	821.229	820.229	0.0957701	1317.7	1316.7	0.140321	2.91393	3.11949	4.23247
LR-01_Td-Agch - 9	rim		ok	14.27		<3.2171	354.846						0.387959		483318	1608.71	6.42085	<0.11213	<0.033107	12.7778	0.027771	0.922687	3.41998	0.387951	26.8568	10.1626	140.961	56.2706	272.478	60.1924	546.283	101.184	10696.5	2.07292	181.786	452.996	0.401296	3.87543	45.1847	0.123755	573.931	572.931	0.113667	798.171	797.171	0.15487	2.7581	2.90155	4.2125
LR-01_Td-Agch - 13	core/inner part of 14		shorter,endCa,Pincl.	14.4		<3.8513	231.622						0.417936		489301	1269.39	3.68315	<0.1475	<0.03946	7.32271	0.0356554	0.760367	2.64024	0.336718	21.2729	7.99969	112.298	45.206	215.902	46.7021	436.383	76.4627	10970.2	1.45045	108.997	319.788	0.340843	3.88595	44.6029	0.137359	398.127	397.127	0.123829	274.215	273.215	0.13184	2.59893	2.43651	3.95274
LR-01_Td-Agch - 16	rim		shorter,endCa,Pincl	13.86		<3.445	353.207	4.48211	719.063	36.0081	705.52	735.574	0.599032		474704	2566.72	5.72212	<0.14297	<0.033006	10.8276	0.0752747	2.21556	6.81647	0.718407	48.4896	17.7975	235.612	91.6942	421.615	87.9708	781.168	138.142	9900.15	1.8043	257.694	595.901	0.432444	3.31548	47.9492	0.120806	152.223	151.223	0.110177	483.63	482.63	0.208161	2.17962	2.68361	3.89853
LR-01_Td-Agch - 18	core/inner part of 17		shorter,1stpartCa,Pincl.	14.72		<4.2062	508.279						0.743655		457282	2533.6	17.3544	<0.17551	<0.046251	15.372	0.0340914	0.91567	3.45708	0.292926	33.6014	14.5845	207.661	84.0705	414.126	87.8841	780.208	148.007	11438.2	7.58914	593.597	1604.23	0.37002	3.75713	39.9786	0.08309	895.767	894.767	0.0715494	834.518	833.518	0.0875402	2.95171	2.92091	4.67262
LR-01_Td-Agch - 22	rim of 21		ok	14.23		<3.1286	328.499						0.314987		474414	1455.13	7.37326	<0.086635	<0.031279	12.5402	0.0583883	1.12957	3.27935	0.491747	25.4761	9.75413	133.381	51.3982	244.208	52.2169	463.98	85.5127	10282.6	2.51993	193.936	489.705	0.396027	3.47862	46.1375	0.164477	413.002	412.002	0.142887		-1		2.6149	#NUM!	3.92361
LR-01_Td-Agch - 23	core/inner part		heterogeneous	14.93		<3.2454	152.289	2.48244	669.085	32.9001	656.863	683.961	0.157671		473819	453.959	2.68633	<0.07291	<0.033697	4.567	<0.015778	0.289389	0.916213	0.142691	6.15672	2.43804	35.4553	15.0395	78.4387	18.1843	176.003	36.2419	9687.94	0.714659	38.6306	134.381	0.287471	4.96408	48.9082	0.183674	849.311	848.311	0.153117		-1		2.92855	#NUM!	#VALUE!
LR-01_Td-Agch - 24	core/inner part		1stpartPincl,shorter	13.95		<3.8276	412.547						0.402214		455808	1803.89	13.9144	<0.11093	<0.037242	9.36026	<0.019977	0.593148	2.34311	0.253842	22.0896	9.31515	143.334	60.4579	313.607	72.6004	662.122	133.74	11080.5	4.69405	157.236	614.632	0.255821	4.61943	41.1361	0.107869	1078.21	1077.21	0.0911776	886.288	885.288	0.0997152	3.0323	2.94708	#VALUE!
LR-01_Td-Agch - 27	rim		twoparts,inclbetween	14.58		<4.2543	235.697	4.7025	723.357	36.2824	709.697	740.012	0.284891		477027	934.139	4.76132	<0.18987	<0.046207	13.0176	0.0333969	0.826337	2.31329	0.376917	14.97	5.78677	78.4265	31.1294	156.361	35.6598	319.885	63.1006	9883.19	1.42401	135.61	290.046	0.467546	4.07879	48.2665	0.195814	629.217	628.217	0.166169	138.226	137.226	0.10324	2.79811	2.13744	3.93876
LR-01_Td-Agch - 30	core/inner part of 31		inhomogeneous,endisdiffinREE	14.42		<3.8048	371.341	4.70098	723.328	36.2805	709.669	739.982	0.748776		486916	3321.81	6.5215	<0.17528	<0.040809	15.3863	0.270531	5.0771	11.7447	1.84499	71.5129	24.4893	314.261	115.345	540.988	111.89	992.541	173.947	8995.35	1.6091	333.597	592.423	0.563107	3.15834	54.1297	0.194627	75.2228	74.2228	0.172562	409.044	408.044	0.380674	1.87054	2.61071	3.34041
LR-01_Td-Agch - 34	rim		short,endAlincl	14.13		<4.2643	399.795						0.500077		486859	1738.69	8.80781	<0.12206	<0.040665	17.9618	0.0368504	1.46457	4.05182	0.524433	28.5587	11.311	149.969	59.2452	295.744	63.277	580.687	103.172	10600.9	2.51345	302.535	620.612	0.487478	3.87205	45.9263	0.149046	469.093	468.093	0.126095	615.949	614.949	0.16486	2.67033	2.78884	4.22638
Td-A_CAgch - 1	rim			13.69		<4.7134	555.766						0.632321		450712	2600.36	15.3543	<0.17422	<0.032758	16.2206	0.0567324	1.02797	4.15986	0.357074	37.0604	15.2686	217.318	88.5432	438.311	91.5393	823.997	158.32	11719.4	5.99425	488.212	1309.71	0.372762	3.79166	38.4588	0.08792	775.183	774.183	0.0788924		-1		2.88884	#NUM!	4.36335
Td-A_CAgch - 2	rim		Apatite at beginning	13.98		<6.2819	398.78						0.535106		437674	1987.55	13.0699	<0.25008	<0.048651	9.83409	<0.027798	0.556851	2.43724	0.231946	26.6571	10.7307	162.513	68.0601	344.778	74.8436	682.755	137.286	11382.5	4.13823	201.821	694.953	0.29041	4.20124	38.4515	0.0879742	1134.5	1133.5	0.0785879	136.27	135.27	0.0433334	3.05442	2.1312	#VALUE!
Td-A_CAgch - 3	core/inner part		heterogeneous	13.81		<4.4733	561.443	4.04314	709.967	35.4309	696.669	726.173	0.815696		455771	3806.41	5.73231	<0.12086	0.155659	17.3193	0.448634	7.32364	15.2092	2.30079	93.2209	30.2822	369.213	134.4	613.075	117.644	1007.11	187.472	8675.97	1.37206	406.637	623.606	0.652073	2.72771	52.5325	0.186806	48.3386	47.3386	0.168296	82.0752	81.0752	0.236006	1.67522	1.90889	3.14302
Td-A_CAgch - 4	core/inner part		heterogeneous	14.61		<4.3791	384.255	3.47122	696.808	34.605	683.861	712.58	0.498592		457098	2470.35	4.69362	<0.14078	0.0357034	12.6497	0.256325	4.27724	9.62387	1.57364	57.2098	18.5669	236.765	87.1711	411.35	80.4463	700.739	135.371	9443.7	1.22609	225.391	408.713	0.551467	2.95964	48.4025	0.20503	67.7186	66.7186	0.185136	128.861	127.861	0.26399	1.82425	2.10674	3.20263
Td-A_CAgch - 5	core/inner part		heterogeneous	14.67		<4.592	374.767						0.49049		457398	2247.47	6.6802	<0.14884	<0.03229	14.147	0.115524	2.04314	5.33526	0.656848	37.8358	14.4222	196.774	76.9322	379.34	78.7088	693.131	134.047	11145.5	2.3054	251.407	629.635	0.399291	3.52247	41.0389	0.141338	252.981	251.981	0.11922	654.575	653.575	0.196522	2.40137	2.8153	3.73642
Td-A_CAgch - 6	rim		heterogeneous	13.9		<4.6198	539.825	4.60799	721.537	36.1659	707.926	738.13	0.591568		452822	1766.18	10.1156	<0.16199	<0.031887	10.984	0.031668	0.670766	2.64819	0.342577	23.1495	9.72541	142.512	60.6899	316.614	69.5308	649.298	134.692	10328.8	3.21823	201.721	677.296	0.297833	4.55611	43.8406	0.133763	1012.83	1011.83	0.115064	1167.99	1166.99	0.139991	3.00511	3.06707	4.33016
Td-A_CAgch - 7	rim			13.88		<4.4263	314.671						0.297945		459131	1337.83	7.0271	<0.1511	<0.032565	11.8505	0.0244705	0.784541	2.65959	0.304591	20.1703	8.15961	115.066	46.6366	235.225	49.7112	457.582	91.6464	10922.9	2.33332	178.25	490.262	0.363581	3.97669	42.0339	0.127139	699.006	698.006	0.109912	708.16	707.16	0.127164	2.84386	2.84952	4.30179
Td-A_CAgch - 11	rim of 10			14.06		<4.3369	334.921						0.377963		462931	1347.63	8.08569	<0.15699	<0.034884	13.5164	0.0381481	0.918831	2.47632	0.352099	19.2081	7.44023	107.074	45.3473	235.865	51.7923	487.955	102.447	10376.9	2.5182	133.93	382.179	0.350437	4.55717	44.6118	0.156078	784.679	783.679	0.125999	116.089	115.089	0.0658515	2.89414	2.06103	4.00079
Td-A_CAgch - 12	rim			13.91		<4.7962	367.069	3.55427	698.825	34.7309	685.824	714.663	0.863504		478771	3676.07	4.39986	<0.16601	<0.034502	14.7299	0.406376	7.75282	16.5673	3.05455	92.9783	29.1443	360.858	129.215	599.607	114.645	978.292	193.462	9289.9	1.17528	324.016	493.741	0.656248	2.71101	51.5368	0.237933	37.0201	36.0201	0.218951	193.595	192.595	0.451932	1.55654	2.28465	3.08457
Td-A_CAgch - 13	rim			14.35		<4.2825	325.019						0.364996		457079	1862.5	8.62936	<0.14297	<0.030146	13.0522	0.0594923	1.07654	3.71959	0.474531	29.029	11.197	156.102	64.032	318.791	66.8225	608.27	120.72	11036.2	2.68388	204.591	547.488	0.373689	3.89662	41.4161	0.139612	531.616	530.616	0.123958	489.671	488.671	0.139971	2.72478	2.68902	3.96391
Td-A_CAgch - 14	rim		Apatite at beginning	13.88		<5.9801	520.874						0.410024		452110	1656.64	4.95026	<0.19483	<0.047456	10.6704	0.0630668	1.22679	3.4712	0.406287	26.6513	10.3211	140.442	56.9934	284.932	59.2883	539.591	109.128	10807.9	1.52953	210.369	481.66	0.436758	3.8421	41.8315	0.129139	368.414	367.414	0.109347	349.245	348.245	0.121184	2.56516	2.54188	3.88294
Td-A_CAgch - 15	core/inner part of 14			13.88		<4.4048	546.778						0.33812		466591	1669.45	5.30472	<0.14721	0.0339	9.2918	0.0632707	1.04126	3.22985	0.50366	26.4139	9.87669	139.841	57.3321	287.64	59.9634	556.04	110.153	10293.9	1.47351	192.626	454.201	0.4241	3.97622	45.327	0.166707	403.513	402.513	0.14446	956.205	955.205	0.23036	2.60478	2.9801	3.85605
Td-A_CAgch - 16	rim			14.03		<4.2725	420.905						0.256997		450031	1077.31	5.60924	<0.14285	<0.031666	8.74656	0.016796	0.555344	2.00392	0.306107	15.0658	6.13332	87.4296	37.0005	195.015	41.5704	390.195	81.8383	10139.2	1.5877	94.2205	299.323	0.314779	4.46296	44.3853	0.170318	836.163	835.163	0.146758	1113.34	1112.34	0.182516	2.92177	3.04624	4.25094
Td-A_CAgch - 19	rim			14.07		<4.2355	420.691						0.504339		448688	1913.98	15.181	<0.15725	<0.035621	10.3059	0.0165131	0.445925	2.28355	0.216102	22.9144	9.83047	147.468	64.3873	343.294	76.1812	718.69	148.495	11589.9	5.2287	194.728	749.635	0.259763	4.87353	38.7138	0.091332	1708.3	1707.3	0.0821205	477.957	476.957	0.0607221	3.23231	2.67848	4.65702
Td-A_CAgch - 20	rim		heterogeneous	14.63		<4.4067	359.274	3.30625	692.681	34.3482	679.843	708.318	0.280538		464325	1338.24	6.3738	<0.13485	<0.033706	21.2184	0.107098	1.71633	4.37537	0.398353	27.3872	9.61657	123.034	46.2841	223.754	44.8736	402.399	78.522	10009.7	1.78335	384.005	448.971	0.8553	3.27064	46.3876	0.111253	341.907	340.907	0.0995695	620.487	619.487	0.139717	2.53264	2.79203	3.62244
Td-A_CAgch - 23	rim		Apatite at beginning	14.34		<7.4693	619.287						0.69304		440160	2155.14	13.017	<0.29083	<0.071223	16.2467	0.0458596	1.06179	3.64437	0.371299	31.2786	12.4807	175.211	72.6246	364.617	75.7159	669.392	131.424	10867.3	5.42211	405.943	986.318	0.411574	3.82049	40.5033	0.106319	724.804	723.804	0.0923935	1037.56	1036.56	0.127041	2.85962	3.01559	4.33259
Td-A_CAgch - 24	core/inner part of 23		heterogeneous	14.93		<4.3402	344.19	3.30301	692.598	34.343	679.763	708.232	0.294173		464270	1485.59	4.57123	<0.14478	<0.036607	7.92189	0.0362399	0.794168	2.93963	0.422268	23.4135	9.19517	126.674	50.8721	255.762	53.6817	490.096	97.1884	10272	1.67758	141.838	401.059	0.353658	3.86897	45.1976	0.155608	439.233	438.233	0.14058	333.808	332.808	0.148932	2.64171	2.52219	4.04402
Td-A_CA-Grain1 - 1	core/inner part		shorter avoid La	14.072	0.279761	b.d.l.	510.993						n.d.	0.640835	n.d.	2280.06	14.7347	0.120364	b.d.l.	15.944	0.0618528	1.04164	3.72448	0.408842	34.8721	14.1666	201.786	80.1697	392.527	84.2285	765.396	135.884	10886.5	5.63644	463.291	1234.38	0.375323	3.79311		0.109675	738.449	737.449	0.095925	299.614	298.614	0.0862591	2.86773	2.47511	4.30009
Td-A_CA-Grain2 - 2	rim		shorter avoid La	14.681	0.365201	b.d.l.	332.248						n.d.	0.679096	n.d.	2358.87	5.50829	b.d.l.	b.d.l.	11.5023	0.205523	3.42047	7.34301	1.16806	49.1511	17.4341	224.774	84.3692	388.041	81.177	721.381	128.281	8682.75	1.51137	225.539	509.456	0.442704	3.20936		0.187969	93.0539	92.0539	0.159873	282.577	281.577	0.282675	1.96404	2.4496	3.39425
Td-A_CA-Grain3 - 3	rim			14.11	0.279593	b.d.l.	450.297						n.d.	0.453462	n.d.	2373.12	16.1223	0.119441	b.d.l.	20.9158	0.0491884	1.35393	5.14152	0.643856	43.0598	16.424	220.448	85.1639	402.498	84.5195	766.154	129.911	10198.8	4.88702	839.343	1418.06	0.591896	3.47543		0.132291	564.266	563.266	0.124504	1231.35	1230.35	0.215163	2.75071	3.09003	4.45983
Td-A_CA-Grain4 - 4	rim			14.585	0.418135	b.d.l.	340.697						n.d.	0.518028	n.d.	1159.62	4.48232	b.d.l.	b.d.l.	7.39525	0.0369634	0.547827	2.19999	0.384111	18.0382	7.02076	99.7598	40.0595	203.605	45.3899	425.435	78.1284	9009.14	1.46319	97.1885	304.227	0.31946	4.26459		0.186412	651.424	650.424	0.170245		-1		2.8132	#NUM!	3.91543
Td-A_CA-Grain5 - 5	rim			14.943	0.371738	b.d.l.	340.414						n.d.	0.410341	n.d.	1194	6.76032	b.d.l.	b.d.l.	9.24789	b.d.l.	0.966074	2.36359	0.312236	19.2615	7.35435	104.678	42.5843	206.136	45.6088	422.849	74.0664	9657.43	2.54245	164.415	511.322	0.321549	4.03953		0.141474	427.071	426.071	0.114045	467.902	466.902	0.139732	2.62948	2.66923	#VALUE!
Td-A_CA-Grain7 - 7	rim			13.99	0.437115	b.d.l.	247.283						n.d.	0.376835	n.d.	1294.61	6.20499	b.d.l.	b.d.l.	11.5508	0.0429233	1.04483	3.23427	0.539455	23.0575	8.45878	118.588	45.9482	216.533	46.9429	431.594	75.4568	9500.26	2.0832	205.995	466.243	0.441819	3.63944		0.190979	392.266	391.266	0.170708	672.443	671.443	0.251648	2.59247	2.82701	4.03592
Td-A_CA-Grain8 - 8	rim			14.151	0.307017	b.d.l.	314.227						n.d.	0.341917	n.d.	1278.47	3.58965	0.196668	b.d.l.	7.22351	0.0320231	0.709605	2.57118	0.361772	21.8178	8.24303	113.985	45.2158	219.166	47.7896	449.92	79.0565	9978.53	1.51353	124.662	377.246	0.330453	3.94717		0.147668	433.583	432.583	0.134843	316.837	315.837	0.147293	2.63607	2.49946	4.07116
Td-A_CA-Grain10 - 10	rim	Analysis 1	shorter avoid La	14.949	0.280568	b.d.l.	298.789						n.d.	0.455873	n.d.	1292.01	7.87333	b.d.l.	b.d.l.	12.2853	0.0653664	0.997703	2.3974	0.487167	23.0776	8.56009	119.059	45.888	223.465	47.3953	429.225	78.107	9699.66	2.46239	221.668	521.679	0.424913	3.60515		0.200233	526.306	525.306	0.164819		-1		2.72041	#NUM!	3.90205
Td-A_CA-Grain11 - 12	rim			14.082	0.293079	b.d.l.	394.163						n.d.	0.602853	n.d.	1563.5	11.3458	b.d.l.	0.043958	9.11368	b.d.l.	0.596936	2.3543	0.238933	21.368	9.07419	131.118	54.8937	275.316	60.7439	574.913	104.013	10595.7	4.28615	217.938	785.448	0.277469	4.3847		0.102988	873.236	872.236	0.0891934	695.645	694.645	0.101147	2.94063	2.84176	#VALUE!
Td-A_CA-Grain12 - 13	core/inner part			14.056	0.313164	b.d.l.	255.221						n.d.	0.513643	n.d.	1214.05	7.36507	b.d.l.	0.0505337	9.59748	0.0430076	0.693604	2.2886	0.29645	17.5738	7.14413	104.721	42.1529	213.263	47.8956	442.997	81.3703	10557.1	2.57259	174.144	548.544	0.317466	4.23028		0.142908	687.309	686.309	0.120697	621.685	620.685	0.13739	2.83652	2.79287	4.10567
Td-A_CA-Grain14 - 15	rim			15.056	0.39715	b.d.l.	469.068						n.d.	0.594935	n.d.	1820.15	10.7672	0.15208	b.d.l.	18.416	0.039389	1.29268	3.57676	0.467601	29.9375	11.6795	160.083	64.0226	316.78	68.6599	635.981	112.277	9838.49	3.05491	401.126	811.982	0.494008	3.97282		0.138148	624.467	623.467	0.115597	723.779	722.779	0.146846	2.79481	2.85901	4.31417
Td-A_CA-Grain15 - 16	rim			14.071	0.568083	b.d.l.	542.143						n.d.	0.412633	n.d.	1398.98	4.75733	b.d.l.	b.d.l.	15.3945	0.0575527	1.37507	3.40365	0.573224	23.5738	8.52293	120.412	47.3874	240.043	53.608	513.791	95.8739	8495.92	1.23748	186.419	378.095	0.493049	4.26694		0.195641	460.47	459.47	0.16259	420.452	419.452	0.17305	2.66226	2.62268	3.81753
Td-A_CA-Grain16 - 17	core/inner part			14.639	0.424327	b.d.l.	277.556						n.d.	0.449047	n.d.	1393.52	7.57788	0.25087	0.0780955	13.7777	0.0681244	0.852945	2.92909	0.474274	21.1323	8.18412	116.056	47.4694	242.82	54.2839	516.707	95.2246	9298.31	2.16727	143.422	382.499	0.374959	4.45224		0.184295	751.427	750.427	0.161423	543.103	542.103	0.165191	2.87531	2.73408	3.74933
Td-A_CA-Grain17 - 18	rim	Analysis 1		14.079	0.424	b.d.l.	311.581						n.d.	0.41157	n.d.	1407.8	6.63934	b.d.l.	b.d.l.	11.2997	0.0641483	1.02794	3.32898	0.476853	23.5125	8.94223	124.641	49.0516	244.971	53.6611	495.034	90.4555	9886.87	2.35597	153.699	466.523	0.329456	3.97169		0.164779	440.174	439.174	0.14567	733.877	732.877	0.207129	2.64264	2.86503	3.86169
Td-A_CA-Grain17 - 19	rim	Analysis 2		14.7	0.378561	b.d.l.	551.339						n.d.	0.184202	n.d.	1073.61	4.53994	b.d.l.	0.0371884	5.32576	0.0290155	0.445312	1.454	0.196719	13.4711	5.70385	86.7078	36.5045	187.37	42.1566	408.612	76.2299	10231.2	1.62107	91.8528	411.68	0.223117	4.71251		0.13589	782.969	781.969	0.109498	429.092	428.092	0.103113	2.89319	2.63154	4.15193
Td-A_CA-Grain19 - 21	rim	Analysis 1		14.545	0.43076	b.d.l.	228.434						n.d.	0.558851	n.d.	983.91	5.77878	0.101273	b.d.l.	6.70528	0.0418705	0.508752	1.55325	0.234151	12.3958	5.39333	79.9518	33.0904	171.223	39.6825	384.377	70.5563	10904.4	2.60942	114.801	393.21	0.291959	4.8076		0.163141	799.947	798.947	0.129216	602.901	601.901	0.134238	2.90252	2.77953	3.97272
Td-A_CA-Grain19 - 22	rim	Analysis 2		14.388	0.299565	b.d.l.	395.355						n.d.	0.379887	n.d.	1981.95	12.7759	b.d.l.	b.d.l.	13.1649	0.0305541	0.631724	3.08594	0.311811	28.0421	11.7923	168.877	69.1954	347.465	75.8345	708.737	126.612	11015.3	4.96025	260.625	897.557	0.290372	4.19677		0.102475	1119.39	1118.39	0.0952435	711.236	710.236	0.102495	3.0486	2.8514	4.46799
Td-A_CA-Grain21 - 24	rim	Analysis 1		14.082	0.267468	b.d.l.	355.849						n.d.	0.387826	n.d.	1357.73	6.57285	b.d.l.	b.d.l.	15.3326	0.0714563	1.11162	3.25066	0.360668	23.1866	8.70785	119.406	46.3765	228.013	48.8508	457.326	82.3628	9972.91	2.08608	291.758	589.711	0.494747	3.83001		0.127007	517.614	516.614	0.1108		-1		2.71317	#NUM!	3.9166
Td-A_CA-Grain21 - 25	rim	Analysis 2		14.269	0.306168	b.d.l.	389.246						n.d.	0.620677	n.d.	1715.52	10.4799	b.d.l.	b.d.l.	11.5445	b.d.l.	0.711742	2.91063	0.264414	24.7946	10.2521	148.633	60.2302	300.012	66.0446	612.62	109.592	11230.1	4.55299	252.067	833.024	0.302593	4.1217		0.0951559	826.367	825.367	0.0848752	549.368	548.368	0.0906218	2.91665	2.73907	#VALUE!
Td-A_CA-Grain22 - 27	rim			14.396	0.437325	b.d.l.	334.378						n.d.	0.445667	n.d.	1585.71	9.17404	b.d.l.	b.d.l.	10.8747	0.0707239	0.97373	2.87483	0.575022	24.4527	9.43182	134.663	54.7788	270.275	59.9475	559.192	102.723	9640.01	2.81003	184.323	499.207	0.369231	4.15254		0.209671	537.667	536.667	0.176379	670.332	669.332	0.226266	2.7297	2.82564	3.84871
Td-A_CA-Grain23 - 28	rim			14.371	0.293521	b.d.l.	348.327						n.d.	0.289326	n.d.	1225.11	6.959	0.0864311	b.d.l.	12.7604	0.0364625	0.634438	2.4845	0.317158	19.1705	7.47273	105.49	42.3796	210.06	45.0077	416.662	75.351	10413.4	2.68284	210.786	559.376	0.376823	3.94979		0.140496	867.547	866.547	0.128607	925.632	924.632	0.160926	2.93779	2.96597	4.18586
Td-A_CA-Grain26 - 31	rim			14.685	0.345456	b.d.l.	783.347						n.d.	0.502586	n.d.	1851.95	5.99135	b.d.l.	b.d.l.	6.83411	0.0352707	0.79124	2.54852	0.269352	24.0866	10.33	151.964	63.7895	317.702	69.5706	654.034	122.653	10670.1	2.13653	191.045	700.902	0.27257	4.30388		0.105102	518.908	517.908	0.0852696	629.148	628.148	0.110475	2.71425	2.79806	4.29824
Td-A_CA-Grain27 - 32	rim	Analysis 1	shorter avoid melt	14.041	0.38402	b.d.l.	471.417						n.d.	0.329133	n.d.	1818.17	11.302	0.133007	0.043245	12.4904	0.0292137	0.584509	2.98236	0.259687	25.5112	10.9059	154.405	62.0922	313.76	67.4595	616.82	114.445	11796.4	4.67324	301.441	933.298	0.322985	3.99482		0.0910183	1081.89	1080.89	0.0858573	368.176	367.176	0.0722799	3.03378	2.56487	4.50443
Td-A_CA-Grain27 - 33	rim	Analysis 2		14.424	0.312917	b.d.l.	364.208						n.d.	0.6048	n.d.	2547.94	5.72572	0.152989	b.d.l.	15.2934	0.151428	2.8854	8.3549	1.00378	50.5334	18.3644	243.385	91.3511	426.896	90.4845	806.968	142.68	10031.3	1.88676	307.904	647.238	0.47572	3.3156		0.149349	148.921	147.921	0.135608	316.276	315.276	0.213031	2.17003	2.49869	3.63086
Td-A_CA-Grain31 - 38	rim	Analysis 1	shorter avoid apatite	13.865	0.267434	b.d.l.	401.323						n.d.	0.941904	n.d.	2597.55	5.21675	b.d.l.	b.d.l.	11.6724	0.07174	1.77658	6.00223	0.692111	49.1109	18.1025	240.211	91.3943	431.692	92.7246	840.842	143.878	10770.7	2.13857	317.37	808.569	0.392508	3.50043		0.123241	229.342	228.342	0.114438	440.288	439.288	0.183423	2.35859	2.64275	4.05196
Td-A_CA-Grain31 - 39	rim	Analysis 2		14.277	0.286566	b.d.l.	399.138						n.d.	0.841518	n.d.	2795.96	5.40893	b.d.l.	b.d.l.	12.4012	0.0537886	1.59517	7.23662	0.660757	51.5302	19.9583	262.281	100.196	475.612	98.7809	879.564	156.822	10979.9	2.14687	353.219	878.345	0.402141	3.35352		0.104608	253.868	252.868	0.104164	447.409	446.409	0.163209	2.40289	2.64973	4.21298
Td-A_CA-Grain31 - 40	rim	Analysis 3		14.62	0.319144	b.d.l.	374.204						n.d.	0.775131	n.d.	2362.53	5.19824	b.d.l.	b.d.l.	10.4634	0.0605633	1.29211	5.52222	0.611463	42.1855	16.2404	217.801	83.7943	401.315	84.1501	754.927	135.69	10980.1	2.06589	286.202	733.317	0.390284	3.46613		0.122477	288.778	287.778	0.118906	450.639	449.639	0.176704	2.45906	2.65286	4.08308
Td-A_CA-Grain32 - 41	rim			14.09	0.306246	b.d.l.	583.843						n.d.	0.658303	n.d.	2409.16	6.0879	b.d.l.	0.0378353	11.0965	0.0533495	1.12457	5.42842	0.428432	39.7622	15.6927	215.266	84.9328	415.889	87.4899	793.895	143.984	10580.7	2.3209	308.734	835.745	0.369411	3.68797		0.0891526	381.547	380.547	0.0874645	373.235	372.235	0.108676	2.58041	2.57082	4.19494
Td-A_CA-Grain33 - 42	rim	Analysis 1		13.978	0.345399	b.d.l.	389.3						n.d.	0.326701	n.d.	1620.07	9.15518	b.d.l.	b.d.l.	22.0221	0.08247	1.211	3.84132	0.592686	30.3919	10.9561	147.78	57.3957	272.424	58.6846	535.067	98.4384	9953.64	2.69131	377.476	675.983	0.55841	3.6207		0.167699	659.666	658.666	0.152981	712.803	711.803	0.187691	2.81867	2.85236	3.91364
Td-A_CA-Grain33 - 43	core/inner part	Analysis 2	shorter avoid melt	14.705	0.372337	b.d.l.	591.62						n.d.	0.377514	n.d.	1477.85	4.44818	b.d.l.	b.d.l.	9.12317	0.0664329	1.28416	3.14474	0.586182	24.1628	9.15419	131.574	52.0783	258.203	57.3244	537.991	97.3619	8327.31	1.11735	135.007	339.344	0.397849	4.08887		0.205584	313.232	312.232	0.166364		-1		2.49448	#NUM!	3.70826
Td-A_CA-Grain34 - 44	rim			14.858	0.292948	b.d.l.	450.215						n.d.	0.541477	n.d.	1969.59	13.783	b.d.l.	0.0335477	13.3096	b.d.l.	0.853561	3.35397	0.209119	27.5143	11.6425	169.797	68.1228	341.935	75.8094	715.665	126.296	10815	5.24764	298.142	988.445	0.301627	4.21481		0.0665515	806.138	805.138	0.0581516	869.14	868.14	0.0739639	2.90587	2.93859	#VALUE!
Td-A_CA-Grain35 - 45	rim	Analysis 1		14.982	0.332651	b.d.l.	604.428						n.d.	0.710048	n.d.	1550.8	8.07456	b.d.l.	b.d.l.	12.0633	0.0436227	0.838825	3.18203	0.344551	23	9.0268	130.428	53.904	269.026	60.3074	575.781	107.116	9726.51	2.22194	167.714	507.521	0.330458	4.41454		0.123129	685.102	684.102	0.10975	868.328	867.328	0.140073	2.83512	2.93818	4.06574
Td-A_CA-Grain35 - 46	rim	Analysis 2		14.337	0.332389	b.d.l.	368.204						n.d.	0.571453	n.d.	2301.42	4.80654	b.d.l.	b.d.l.	11.8497	0.0313545	1.23132	5.17677	0.465292	40.208	15.7089	212.408	82.1426	391.361	82.4455	750.222	129.769	11141.6	1.98001	270.476	694.15	0.389651	3.53198		0.098597	353.556	352.556	0.0943955	577.925	576.925	0.144904	2.54723	2.76112	4.34515
Td-A_CA-Grain36 - 48	rim	Analysis 2		14.223	0.338519	b.d.l.	414.548						n.d.	0.552215	n.d.	2410.04	8.16741	b.d.l.	b.d.l.	10.9954	0.04849	1.01942	4.2043	0.280503	40.351	15.9673	219.199	85.9606	420.521	89.9769	819.971	142.524	11111.9	2.94304	317.467	935.121	0.339493	3.74076		0.0658396	485.328	484.328	0.0612892	651.415	650.415	0.0887014	2.68514	2.81319	4.28522
Td-A_CA-Grain38 - 50	rim		shorter avoid apatite	14.706	0.325826	b.d.l.	296.989						n.d.	0.361316	n.d.	2121.73	5.67113	b.d.l.	b.d.l.	12.7109	0.0484393	1.6381	5.54498	0.540245	39.934	15.2562	202.656	76.6474	360.654	77.2699	693.288	117.062	10316.4	1.91657	255.995	640.02	0.39998	3.421		0.110992	253.883	252.883	0.102263	297.841	296.841	0.135942	2.40292	2.47252	4.121
Td-A_CA-Grain39 - 51	rim	Analysis 1		14.572	0.365594	b.d.l.	390.211						n.d.	0.467062	n.d.	1634.22	3.75867	b.d.l.	b.d.l.	8.99762	0.0962035	2.14575	4.97229	0.69022	31.363	11.4596	149.437	57.3475	274.977	58.5254	541.349	94.5808	9694.69	1.58794	161.327	391.368	0.412213	3.6226		0.168976	128.526	127.526	0.1432	296.648	295.648	0.225646	2.1056	2.47078	3.60939
Td-A_CA-Grain39 - 52	rim	Analysis 2		14.34	0.3196	b.d.l.	351.306						n.d.	0.376831	n.d.	1240.32	6.49528	b.d.l.	b.d.l.	9.75543	0.0407747	0.636372	2.57486	0.351334	18.5764	7.26247	106.717	42.7624	213.609	46.1121	431.321	78.5451	10684.6	2.69653	202.845	576.504	0.351853	4.04173		0.155305	678.24	677.24	0.141768	570.196	569.196	0.160097	2.83074	2.75526	4.15041
Td-A_CA-Grain40 - 53	rim	Analysis 1, young outlier		13.577	0.365215	b.d.l.	455.133						n.d.	0.517275	n.d.	1888.54	11.0021	b.d.l.	b.d.l.	14.087	0.0461668	0.921177	2.70241	0.238949	26.2918	10.9166	158.722	64.3111	325.286	70.2881	643.429	124.617	11477.8	3.79744	277.46	778.977	0.356185	4.0538		0.0866648	864.655	863.655	0.0700183	117.57	116.57	0.039138	2.93634	2.06659	4.22719
Td-A_CA-Grain40 - 54	core/inner part	Analysis 2	very short avoid apatite	14.668	0.273439	b.d.l.	538.705						n.d.	0.551426	n.d.	4269.28	7.32046	0.152282	b.d.l.	27.154	0.572524	9.99392	18.8108	2.68408	108.125	35.1914	443.008	155.82	710.651	146.565	1290.53	222.169	8728.42	2.02554	617.336	912.344	0.676648	2.91311		0.18195	56.3949	55.3949	0.158525	57.6562	56.6562	0.182855	1.74347	1.75325	3.20236
Eger ignimbrite unit
EG1 - 5	core/inner part	few common-Pb		17.926	0.344247	<4.9773	456.003							0.955564		1315.89	3.39198	0.0897886	2.12849	19.8663	0.642484	3.70538	3.95161	0.906366	23.0864	7.77056	102.06	42.1121	219.601	51.9058	533.918	110.207	10061.8	1.45597	565.348	827.438	0.683251	5.2314	0	0.29011	218.826	217.826	0.197829	71.3983	70.3983	0.116513	2.33811	1.84756	3.10987
EG1 - 7	rim			17.974	0.266106	<5.0717	325.616							0.709122		1712.56	7.26246	0.123012	<0.03279	19.5231	0.075089	1.10155	3.07104	0.677556	25.894	9.85723	137.029	57.4153	292.911	65.9505	634.266	125.409	9796.34	2.49624	794.56	1080.7	0.735227	4.62871	0	0.232288	926.682	925.682	0.192472	505.791	504.791	0.169671	2.96646	2.70311	4.15813
EG1 - 9	rim			17.479	0.311872	<4.9425	330.559							0.649721		1078.95	3.90143	0.102215	1.35407	17.8453	0.362414	1.88805	1.85668	0.524692	14.5712	5.41626	77.8399	33.5854	184.024	44.705	474.059	100.796	10149.6	1.69481	525.904	775.047	0.678545	6.09018	0	0.308399	631.015	630.015	0.187718	252.033	251.033	0.119645	2.79935	2.39973	3.33012
EG1 - 11	rim			17.526	0.305185	<4.9649	332.06							0.61223		1588.62	6.24959	<0.082715	<0.049254	18.6702	0.0982858	1.39226	3.12919	0.689625	24.97	9.76494	133.283	54.1962	273.187	60.5662	583.367	109.587	9178.27	1.81523	786.76	892.347	0.881675	4.37691	0	0.238513	635.137	634.137	0.187134	486.903	485.903	0.188268	2.80218	2.68655	3.95804
EG1 - 15	core/inner part			17.094	0.285361	<4.9335	594.486							0.9732		2293.62	7.75578	0.0806211	<0.046843	22.3606	0.108558	1.57539	4.85929	0.823078	36.0403	13.4699	183.737	76.1166	392.623	88.941	859.747	170.351	9493.41	2.511	832.532	1305.15	0.637882	4.67923	0	0.190145	672.077	671.077	0.164745	747.348	746.348	0.187603	2.82677	2.87294	4.08
EG1 - 16	core/inner part of 17			17.907	0.527046	<7.4328	382.989							0.524459		888.675	3.54967	<0.11382	<0.076447	10.3145	0.0810918	0.612618	1.51771	0.354733	10.3014	4.1575	59.2278	26.7519	150.867	38.9319	416.137	93.3804	9751.93	1.6731	252.258	579.424	0.43536	7.02604	0	0.274273	1270.98	1269.98	0.20642	579.304	578.304	0.142988	3.1038	2.76216	3.85402
EG1 - 17	rim			17.399	0.331663	<4.9149	188.58							0.558696		1144.74	4.13047	0.0690801	<0.032229	12.0242	0.0580408	0.894823	2.47792	0.505611	15.207	5.76272	82.5038	35.4055	194.969	48.058	496.335	106.394	10376.3	1.82421	358.791	725.31	0.494673	6.0159	0	0.251811	779.789	778.789	0.204175	103.831	102.831	0.0925535	2.89142	2.01212	4.09679
EG1 - 19	rim			17.989	0.325351	<5.0533	301.745							0.566991		895.818	2.99762	<0.077882	<0.032265	8.60006	0.0360121	0.470652	1.45698	0.315624	11.0751	4.37586	62.4703	27.9484	154.142	38.323	408.196	87.256	10596.4	1.30647	249.398	595.134	0.419062	6.53423	0	0.240211	1325.89	1324.89	0.194555	396.663	395.663	0.123177	3.12218	2.59733	4.21817
EG1 - 20	rim			18.075	0.370572	<5.0307	362.419							0.708411		806.464	2.79239	<0.079902	1.37708	15.4216	0.335711	1.77885	1.88602	0.413396	11.8371	4.57385	61.3205	26.2331	135.91	32.4205	333.212	70.8625	9952.79	1.27541	442.995	653.514	0.677866	5.43394	0	0.267482	443.977	442.977	0.169885	219.545	218.545	0.117709	2.64638	2.33954	3.28929
EG1 - 21	rim			17.457	0.279402	<4.9389	275.95							0.647691		1400.45	5.60177	0.0980465	<0.054239	16.0988	0.0605426	1.20975	2.91705	0.553613	21.0459	8.18851	112.095	46.5509	238.987	53.5061	516.368	101.209	9433.16	1.7268	670.978	832.976	0.805519	4.60651	0	0.21601	634.738	633.738	0.172259	141.51	140.51	0.105243	2.80191	2.14771	4.13857
EG1 - 25	core/inner part			17.273	0.266613	<4.8571	247.422							0.54496		1401.72	3.83502	<0.072349	0.031771	12.4587	0.0909736	0.962566	3.18087	0.536401	19.302	7.24191	101.542	44.1465	239.676	58.6521	604.618	127.694	10514.4	1.85791	375.735	792.249	0.474264	5.95437	0	0.209286	713.633	712.633	0.179978	652.186	651.186	0.173309	2.85287	2.81371	3.93995
EG1 - 26	core/inner part			17.741	0.318491	<5.0233	357.346							0.746595		1006.73	4.12802	0.089671	1.21405	18.1882	0.325468	1.78308	1.75277	0.498246	13.1932	4.92046	72.1161	30.8547	170.521	42.1887	438.454	93.4903	10386.4	1.74984	415.478	718.705	0.578092	6.07984	0	0.31676	682.736	681.736	0.191695	416.685	415.685	0.14296	2.83362	2.61876	3.34404
EG1 - 35	rim			17.396	0.39076	<4.9996	199.755							0.46902		759.13	2.86085	<0.068855	<0.02084	9.34232	0.0336889	0.400366	1.12834	0.329769	8.2755	3.45133	50.9614	22.451	131.963	33.9935	365.997	81.6946	10383.9	1.28204	242.052	504.866	0.479438	7.18184	0	0.329927	1990.63	1989.63	0.250763	502.407	501.407	0.142093	3.29877	2.70019	4.17569
EG1 - 37	rim			16.945	0.416285	<5.1555	251.52							0.394684		1156.99	3.99545	<0.093527	<0.03229	14.142	0.058401	0.697677	2.00725	0.500035	14.3863	5.59395	81.6363	35.7667	199.476	48.5858	501.161	107.811	9923.52	1.53913	352.027	630.506	0.558325	6.13895	0	0.284478	1369.88	1368.88	0.227354	934.999	933.999	0.196061	3.13636	2.97035	4.03327
EG1 - 38	core/inner part of 37			17.728	0.278966	<5.1511	334.406							0.58715		1581.18	6.65558	0.0836207	0.0524683	20.6511	0.0514023	1.04621	2.51477	0.55182	18.6626	7.40712	111.085	48.6519	269.405	65.2404	667.447	139.461	10244.7	2.39452	614.648	1042.59	0.589538	6.00845	0	0.246255	1385.19	1384.19	0.184488	719.984	718.984	0.14473	3.1412	2.85672	4.30713
EG1 - 39	core/inner part			17.645	0.324528	<5.0517	301.279							0.659803		1468.05	6.5082	<0.073059	<0.054271	14.7493	0.0312402	0.614934	2.43451	0.438529	18.3828	7.36806	105.778	46.5148	252.437	60.8126	617.812	127.282	10237.4	2.78938	500.45	1082.79	0.462187	5.84067	0	0.200406	1582.35	1581.35	0.174085	1197.1	1196.1	0.167588	3.19903	3.07777	4.53983
EG1 - 40	rim		melt and apatite avoided	17.551	0.292424	<5.4296	289.663							0.418436		1345.43	5.95385	0.144139	0.125583	14.9105	0.0640814	1.11767	2.36261	0.404662	17.8544	7.24766	100.059	42.7493	233.612	54.5902	554.331	114.717	10504.6	2.48939	474.277	923.372	0.513636	5.54006	0	0.190479	821.109	820.109	0.14095	614.971	613.971	0.127703	2.91387	2.78815	4.15864
EG1 - 41	rim			17.697	0.370856	<4.982	341.751							0.433787		799.655	1.96916	<0.078246	<0.050802	7.53509	0.0309197	0.605345	1.25439	0.34884	9.49068	3.57562	54.0385	24.1761	137.404	34.7825	373.755	84.2803	9931.28	0.848593	236.606	520.155	0.454877	6.91646	0	0.309089	988.404	987.404	0.223473	583.751	582.751	0.169255	2.99449	2.76548	4.2259
EG1 - 42	rim			17.918	0.416477	<5.0741	242.912							0.329662		750.424	2.44083	0.129839	0.039337	11.0925	0.0455755	0.716012	1.67636	0.313587	9.84588	3.80038	52.7961	23.5619	126.602	31.036	328.097	70.4298	10169.5	1.10881	271.281	472.727	0.573865	6.21441	0	0.235978	890.201	889.201	0.182252	392.24	391.24	0.126448	2.949	2.59244	4.01588
EG1 - 43	rim			18.195	0.410177	<4.9939	196.156							0.638202		727.472	2.61816	<0.084051	<0.043256	9.35789	0.0234927	0.403829	1.39646	0.299931	8.63715	3.28835	50.173	22.2317	126.654	32.0738	343.345	76.7259	10375.4	1.3421	210.382	473.728	0.444098	6.84322	0	0.264026	1641.75	1640.75	0.22008	43.3123	42.3123	0.0531407	3.21504	1.62647	4.3046
EG1 - 45	rim			17.72	0.351562	<4.9979	221.592							0.502937		764.646	2.53745	0.100373	<0.032595	10.8931	0.0518386	0.783745	1.37357	0.263381	10.0701	3.74858	54.4431	23.7192	128.435	32.1035	339.786	72.0997	10087.5	1.07076	327.657	492.14	0.66578	6.24113	0	0.216505	916.817	915.817	0.153978		-1		2.96181	#NUM!	3.97744
EG1 - 48	rim			17.906	0.351243	<6.8541	675.574							1.18044		868.227	3.39076	0.169933	4.68898	20.6384	1.10759	4.77234	1.97713	0.43226	10.3012	3.98799	61.768	26.1876	150.237	36.0581	385.087	85.661	9918.2	1.59904	291.812	630.519	0.462811	6.23442	0	0.292824	268.432	267.432	0.136701		-1		2.42721	#NUM!	2.75532
EG1 - 49	rim	few common-Pb	apatite avoided	18.319	0.588118	<6.1464	145.14							0.404553		386.006	1.28781	<0.10118	<0.053644	4.98076	<0.03202	0.273399	0.780492	0.220908	4.43512	1.85055	26.4024	11.754	65.9701	16.7161	181.431	41.4339	9935.98	0.552042	82.8118	197.629	0.419026	6.87175	0	0.362993	1254.88	1253.88	0.2829	206.87	205.87	0.131659	3.09825	2.31359	#VALUE!
EG1 - 50	core/inner part of 49			18.337	0.423903	<4.9484	323.905							0.397361		794.224	2.15087	<0.076645	<0.037484	8.06034	<0.02995	0.560722	1.45314	0.389575	9.21494	3.6177	52.7877	24.0988	139.81	35.0775	381.345	84.4004	9531.99	0.956591	145.01	334.702	0.433251	7.22413	0	0.325473	1067.18	1066.18	0.248561		-1		3.02783	#NUM!	#VALUE!
EG1 - 51	rim			18.071	0.311741	<5.1665	314.776							0.584596		1151.5	4.3327	<0.097285	<0.054046	13.7999	0.0624762	0.957148	2.62044	0.487904	16.7476	6.8819	92.6668	38.2184	196.669	44.2961	431.876	85.6984	9792.03	1.64504	643.315	869.456	0.739905	4.66053	0	0.225162	668.256	667.256	0.183558		-1		2.82429	#NUM!	4.14353
EG1 - 52	rim			17.612	0.383989	<5.0496	260.354							0.744556		1062.5	3.80359	<0.073471	<0.041498	12.7901	<0.036082	0.818054	1.81224	0.489337	11.693	4.77384	71.4301	32.1234	186.068	46.5792	509.766	111.42	9833.46	1.273	279.954	544.871	0.513799	7.13656	0	0.324983	1220.39	1219.39	0.23298	439.526	438.526	0.146761	3.08614	2.642	#VALUE!
EG1 - 54	rim			17.353	0.404279	<5.0277	218.488							0.321337		503.188	1.83451	<0.066752	<0.032822	7.74278	<0.024261	0.355966	0.919434	0.249801	6.9366	2.55582	35.608	15.6023	88.0899	21.7755	236.978	50.6092	10466.3	0.834255	189.526	368.269	0.51464	6.65518	0	0.302402	1464.32	1463.32	0.241432	345.984	344.984	0.135155	3.16534	2.5378	#VALUE!
EG1 - 55	core/inner part		very short signal	17.919	0.47431	<6.2046	272.267							0.711603		1245.46	4.76451	<0.098783	<0.066832	11.1011	0.0612201	0.783725	2.15432	0.433155	15.6395	6.51028	92.0413	39.5478	219.084	52.5181	540.732	110.101	10074.9	1.78795	288.282	658.419	0.437839	5.87489	0	0.228139	929.92	928.92	0.177874		-1		2.96798	#NUM!	4.03161
EG1 - 56	rim			17.546	0.382692	<5.0737	196.134							0.456153		1019.53	5.42564	<0.074558	<0.049244	17.175	0.0576754	0.888925	1.90875	0.369657	15.0795	5.69041	78.563	32.5924	170.726	40.8024	414.776	85.2579	10748.1	2.36943	838.356	1122.79	0.746675	5.27953	0	0.210647	1084.29	1083.29	0.162408	310.58	309.58	0.102707	3.03475	2.49077	4.28931
EG1 - 57	rim			17.604	0.364852	<5.2284	212.286							0.479836		757.19	3.0573	<0.089081	<0.054011	9.28582	<0.029485	0.455126	1.27366	0.304	8.75051	3.43935	52.1101	23.3463	133.808	34.3728	378.136	84.1225	10296.1	1.31231	208.655	476.88	0.437543	7.25649	0	0.278391	1642.45	1641.45	0.214903	747.18	746.18	0.149805	3.21523	2.87284	#VALUE!
EG1 - 59	rim			17.247	0.278538	<5.0053	372.33							0.807254		1521.94	7.65438	0.197465	0.382056	30.9384	0.134967	1.68706	3.63204	0.696278	23.5585	8.88021	120.918	48.7199	255.562	58.6789	593.861	120.332	10378.5	3.22988	1368.64	1556.1	0.879535	4.91127	0	0.230122	844.22	843.22	0.180911	1554.72	1553.72	0.229847	2.92594	3.19137	4.06181
EG1 - 60	rim			17.963	0.455299	<4.9621	262.515							0.602061		671.331	1.80119	<0.074229	<0.037842	10.9349	0.0269374	0.622986	1.40526	0.36028	9.48916	3.50173	48.4422	20.6992	113.703	27.4689	295.41	62.9909	9853.6	0.884619	375.671	539.585	0.696221	6.09819	0	0.301628	1018.03	1017.03	0.23545	119.032	118.032	0.0997232	3.00733	2.072	4.3017
EG1 - 62	rim			17.887	0.351513	<5.1446	259.736							0.582705		877.647	3.44894	<0.093911	<0.04196	9.16171	0.0250095	0.51425	1.35445	0.326034	10.3004	4.25076	60.9943	27.5532	156.003	39.035	425.48	91.339	10543.3	1.83207	216.979	570.683	0.38021	6.97574	0	0.266857	1432.58	1431.58	0.201639	977.07	976.07	0.169812	3.15582	2.98948	4.35829
EG1gch - 5	rim	n.d.	(*)	n.d.	n.d.	Below LOD		2.80335	678.953	33.5015	666.475	694.145			516400	2470		0.081	0.018	21.2	0.256	4.8	8.8	1.7	50.3	17.4	219	85	391	91	880	161	9980		690	874	0.789474	4.01826	51.7435	0.247029	130.028	129.028	0.20215	652.702	651.702	0.389049	2.11068	2.81405	3.53327
EG1gch - 9	rim	n.d.	*	n.d.	n.d.	Below LOD		2.82435	679.565	33.539	667.072	694.777			513900	608		Below LOD	Below LOD	7.16	0.0195	0.603	1.18	0.293	9.12	3.53	46.8	19.94	100.4	25.32	265.9	53.3	10880		130.2	282.5	0.460885	5.68162	47.2335	0.273057	677.694	676.694	0.204657	393.874	392.874	0.166061	2.83039	2.59425	4.16098
EG1gch - 14		n.d.		n.d.	n.d.	Below LOD		3.43332	695.874	34.5468	682.952	711.616			497000	911		0.106	Below LOD	13.51	0.026	0.84	1.77	0.39	12.8	4.99	66	29.02	147.7	37.9	386	82.9	10680		455	661	0.688351	5.84848	46.5356	0.250494	945.408	944.408	0.190029	927.658	926.658	0.182649	2.97516	2.96692	4.40523
EG1gch - 15	rim	n.d.	*	n.d.	n.d.	Below LOD		3.06584	686.351	33.9563	673.68	701.782			503900	687		0.066	Below LOD	11.64	0.034	0.444	1.27	0.347	8.87	3.61	47.6	21.45	111	28.5	317	67.6	10808		430	626	0.686901	6.65966	46.6229	0.316074	1717.36	1716.36	0.254567	246.196	245.196	0.118177	3.23461	2.38951	4.2651
EG1gch - 16	core/inner part	n.d.	*	n.d.	n.d.	Below LOD		4.05279	710.175	35.444	696.871	726.388			497700	635		0.077	Below LOD	7.19	0.0224	0.553	0.99	0.337	7.7	3.028	41.75	19.08	103.1	28.19	316.7	70.8	10090		116	248	0.467742	7.58563	49.3261	0.373156	1059.84	1058.84	0.260089	77.097	76.097	0.0862491	3.02483	1.88137	4.0442
EG1gch - 17	rim	n.d.	*	n.d.	n.d.	Below LOD		2.58286	672.281	33.0942	659.977	687.259			499000	1303		0.064	Below LOD	11.37	0.143	2.1	4.31	1.02	23.3	8.08	101.6	41.9	209.3	50.6	529	109.9	10370		452	656	0.689024	5.20669	48.1196	0.311177	203.808	202.808	0.255769	176.048	175.048	0.228217	2.30708	2.24316	3.66157
Mangó ignimbrite unit
CsO1 - 2	rim			17.259	0.259825	<4.9139	391.766							0.513499		1867.9	6.73807	0.151601	0.405745	34.0621	0.286986	4.03906	7.47795	1.4218	45.4089	14.4006	179.164	65.0911	304.012	62.7377	561.631	102.6	9250.1	2.0591	937.765	883.286	1.06168	3.13473	0	0.235886	191.217	190.217	0.20494	156.947	155.947	0.209913	2.27925	2.19298	3.48824
CsO1 - 4	rim			16.902	0.396232	<5.0609	274.235							0.484931		1202.31	4.58097	0.164742	0.0254941	18.6969	0.0779327	1.45179	3.15278	0.580794	20.3598	7.3731	96.2047	38.8092	199.341	44.5373	426.594	83.508	10579.5	1.80874	538.163	824.617	0.652621	4.43423	0	0.221622	499.502	498.502	0.180714	519.369	518.369	0.192282	2.69767	2.71464	4.02453
CsO1 - 9	rim			16.99	0.246829	<4.9102	550.969							1.11883		1288.6	6.31926	<0.077165	1.34151	16.4247	0.506949	2.98257	3.04443	0.393777	18.9497	7.27426	102.981	42.3451	223.174	51.8284	515.945	99.2961	11288.4	2.94518	445.649	1091.12	0.408431	5.01012	0	0.158496	265.53	264.53	0.0992791	291.497	290.497	0.0988126	2.42247	2.46314	3.33291
CsO1 - 12	rim		very short signal	17.166	0.377718	<8.4296	256.032							0.972562		953.607	2.97581	<0.13166	0.816649	14.7776	0.303094	2.58941	3.39831	0.605716	17.4425	6.23737	84.0063	32.0661	157.08	34.2504	315.181	61.891	9107.33	1.14369	305.908	470.243	0.650531	3.75187	0	0.240523	171.612	170.612	0.174515	224.762	223.762	0.192366	2.23201	2.34979	3.19074
CsO1 - 13	rim			16.981	0.299401	<4.9164	262.603							0.391711		1033.88	3.82537	0.0720413	<0.026156	13.769	0.0544089	1.17228	2.54564	0.534212	16.5131	5.84596	81.6752	33.0286	173.451	39.8456	399.671	79.2156	9902.81	1.59607	329.929	650.139	0.507475	4.89341	0	0.251898	521.803	520.803	0.201918	146.894	145.894	0.127255	2.71667	2.16404	4.07734
CsO1 - 15	rim			17.099	0.298843	<4.8025	255.084							0.486226		1066.06	4.13712	0.0910999	<0.058453	15.2986	0.0635726	1.11167	2.56175	0.459946	17.0672	6.41974	87.8822	35.1447	179.251	40.1727	384.932	74.0467	10789.8	1.83546	486.744	899.849	0.540917	4.3801	0	0.212658	576.592	575.592	0.171565		-1		2.76011	#NUM!	4.1509
CsO1 - 16	rim of 15			17.183	0.325631	<4.8603	347.484							0.502109		1107.87	2.58483	<0.06341	0.0960761	8.17395	0.0652189	1.08815	2.6503	0.545437	18.7085	6.68921	91.1528	36.532	190.827	44.0733	429.782	84.0736	10595	1.08784	186.25	520.887	0.357562	4.71497	0	0.236811	332.445	331.445	0.196633	93.2214	92.2214	0.12841	2.52041	1.96483	3.90237
CsO1 - 17	rim			17.018	0.31152	<4.9762	336.965							0.686244		1742.53	7.09135	0.130017	<0.043181	34.609	0.205999	2.95033	6.70191	1.15269	41.3903	13.7871	165.309	62.1989	289.47	60.4879	544.944	96.91	9489.69	2.05378	1016.13	941.356	1.07943	3.29651	0	0.211587	279.651	278.651	0.191304	618.289	617.289	0.294394	2.44506	2.79049	3.65989
CsO1 - 19	rim			17.725	0.299529	<5.0126	190.716							0.612324		906.331	3.83409	0.21958	<0.032708	9.15515	<0.035605	0.67183	1.66137	0.36109	12.2167	4.59439	67.9586	28.1992	155.628	38.2608	398.086	81.563	11087.4	2.12174	188.764	573.318	0.329248	5.85777	0	0.245035	858.564	857.564	0.191583	310.582	309.582	0.130837	2.93327	2.49078	#VALUE!
CsO1 - 20	rim			17.482	0.376789	<4.8921	324.102							0.77092		1630.72	6.56817	0.154587	0.280704	29.7768	0.216508	2.66149	4.90831	0.910668	31.2318	11.2608	145.169	55.6105	273.194	58.2315	540.459	102.447	9954.96	2.03202	608.354	763.763	0.796522	3.72297	0	0.224863	357.101	356.101	0.179778	564.995	563.995	0.229863	2.55157	2.75127	3.54749
CsO1 - 23	rim			17.801	0.338862	<4.99	260.013							0.443785		1092.32	4.25841	0.100309	<0.062046	16.992	0.067082	1.13188	2.73586	0.543919	17.472	6.40626	84.4943	35.3053	186.492	43.2103	432.708	86.3555	10009.1	1.76017	214.218	462.477	0.463197	5.12115	0	0.240513	674.359	673.359	0.197651	269.605	268.605	0.142691	2.82825	2.42911	3.83848
CsO1 - 28	rim			16.836	0.409816	<4.9738	249.171							0.764457		1015.3	4.66263	<0.056186	0.0831285	7.95586	0.0701192	0.894549	1.92419	0.367583	13.2679	5.31411	78.4435	32.4652	177.375	41.8657	430.693	87.2248	10412.4	2.37796	158.73	599.469	0.264785	5.49049	0	0.222409	536.41	535.41	0.164443	274.13	273.13	0.1285	2.72869	2.43637	3.93193
CsO1 - 29	rim			16.787	0.343709	<4.8945	348.097							0.798076		1888.27	8.33518	0.169105	<0.062102	26.1133	0.0662693	1.7591	4.69606	0.797775	32.0032	11.2546	157.356	62.8348	317.536	69.9692	664.785	124.783	10565.9	2.83603	756.115	1236.18	0.611656	4.22473	0	0.198948	583.082	582.082	0.171028	520.111	519.111	0.181426	2.76498	2.71526	4.27077
CsO1 - 32	rim			16.91	0.396888	<4.9138	336.223							0.734854		2059.64	6.043	<0.095412	<0.026802	21.1271	0.129243	2.23615	5.04445	1.15117	33.7106	12.2816	172.476	69.2691	343.582	74.3683	693.956	131.958	8844.01	1.53313	386.882	608.973	0.635302	4.02349	0	0.269881	367.302	366.302	0.218876	178.102	177.102	0.182651	2.56384	2.24822	3.67319
CsO1 - 34	rim			18.123	0.462051	<5.8888	242.707							0.497749		1007.37	3.67467	<0.07968	<0.04761	14.0539	0.0597099	1.11709	2.84863	0.596875	17.0142	6.11824	81.6234	33.0744	169.213	38.2585	372.571	72.6524	9552.16	1.42088	314.012	554.074	0.566734	4.56451	0	0.26211	483.623	482.623	0.22279	399.361	398.361	0.217337	2.68361	2.60028	3.96752
CsO1 - 35	rim			17.42	0.325312	<4.976	328.923							0.634717		1899.82	5.64099	0.0866082	<0.039662	20.7548	0.0947676	1.88584	4.50554	0.878873	30.5627	11.2551	154.069	63.1018	316.891	69.6215	650.408	122.511	9016.43	1.56075	373.641	634.575	0.588806	4.22155	0	0.228971	442.924	441.924	0.187964	170.126	169.126	0.144498	2.64535	2.22821	3.82582
CsO1 - 36	rim			17.261	0.357593	<4.9675	305.807							0.604472		1347.47	5.57125	<0.081399	0.749783	14.2256	0.251998	1.69208	2.63931	0.492265	19.4218	7.46359	105.473	44.3779	231.777	52.5589	513.833	99.5546	10852.2	2.34033	295.603	740.593	0.399143	4.8717	0	0.2102	436.166	435.166	0.147093	414.004	413.004	0.148699	2.63865	2.61595	3.46818
CsO1 - 38	core/inner part			18.23	0.383665	<5.027	363.882							0.79577		1288.29	3.92825	<0.099602	<0.037392	14.1729	0.0582977	1.07882	2.95184	0.651293	19.994	7.38724	100.893	41.2405	216.82	50.0405	498.343	98.618	9813.9	1.4838	282.662	649.417	0.435254	4.93931	0	0.259181	611.185	610.185	0.218351	164.989	163.989	0.139931	2.78546	2.21481	4.04687
CsO1 - 39	core/inner part			18.079	0.429737	<5.3736	380.004							0.431137		1827.33	2.24623	0.115442	<0.057238	12.9038	0.289216	4.79069	9.24192	1.58524	44.2325	13.8683	169.128	61.806	294.133	61.8152	575.104	108.104	8639.97	0.738019	332.859	469.821	0.70848	3.4004	0	0.239699	55.9633	54.9633	0.213023	157.136	156.136	0.327216	1.74007	2.1935	3.21071
CsO1 - 40	rim			17.004	0.292741	<5.0561	193.033							0.802306		1374.25	5.16566	0.0722521	0.0569974	12.1362	0.0545824	1.16089	3.01102	0.576854	20.7492	7.86286	106.806	43.8251	234.447	53.7733	546.832	108.828	10824.9	2.05856	269.069	753.178	0.357245	5.11985	0	0.223117	515.419	514.419	0.18299	453.744	452.744	0.18125	2.71132	2.65585	4.13985
CsO1 - 41	rim			16.806	0.272501	<4.9588	402.206							0.496875		2054.26	8.2644	0.108163	<0.040344	37.4543	0.221737	3.50757	7.19519	1.31726	45.8069	15.3364	192.897	71.6914	333.446	68.8643	613.416	112.777	9284.13	2.32698	1314.46	1185.91	1.1084	3.18001	0	0.221824	267.964	266.964	0.192445	475.727	474.727	0.269095	2.42645	2.67644	3.72821
CsO1 - 42	rim			17.039	0.299173	<4.9394	223.09							0.3741		1296.06	5.98224	0.0973118	<0.031756	14.4274	0.0662483	1.05701	2.64022	0.570098	17.1742	6.9774	97.7487	41.6904	224.17	52.828	528.325	106.783	10602.8	2.28339	297.511	775.073	0.383849	5.40494	0	0.25883	760.027	759.027	0.201045	605.575	604.575	0.189361	2.88026	2.78145	4.06817
CsO1 - 47	rim of 48			17.861	0.35163	<5.1155	197.899							0.505		750.752	2.44452	<0.072021	<0.050893	12.5883	0.0481504	0.883939	2.0425	0.492247	12.2606	4.19832	56.3614	22.9116	124.326	28.679	288.082	59.1101	10504.7	1.18472	240.597	516.942	0.465424	5.11133	0	0.300726	597.798	596.798	0.250475	82.5729	81.5729	0.117031	2.77583	1.91155	4.03084
CsO1 - 48	rim			17.504	0.305581	<5.1848	277.582							0.555868		1181.92	5.19527	0.0926015	0.194978	16.8397	0.0982004	1.39088	2.62179	0.521266	17.9798	6.702	88.8776	37.4611	199.894	47.2016	471.208	95.9242	11106.2	2.24939	413.166	818.406	0.504842	5.30177	0	0.232108	603.058	602.058	0.17554	86.2897	85.2897	0.083537	2.77964	1.9309	3.92086
CsO1 - 49	rim of 50			17.034	0.370881	<5.1393	296.206							0.705348		1290.42	5.37138	0.110994	0.039858	14.5368	0.0445801	1.20645	2.74953	0.579117	19.6817	7.20011	98.5367	41.283	220.97	50.6948	509.153	102.02	10478	1.81419	247.283	608.406	0.406444	5.16714	0	0.240674	604.669	603.669	0.191783	542.698	541.698	0.189313	2.7808	2.73376	4.13505
CsO1 - 52	rim		melt avoided late	17.94	0.520002	<5.2246	461.111							0.68239		2072	5.13197	0.269401	0.48329	23.1318	0.37949	3.81848	6.25735	1.34356	40.1402	13.7701	182.412	69.2531	344.516	72.5707	660.449	124.019	8616.87	1.29886	418.28	571.657	0.731698	3.62064	0	0.259177	187.241	186.241	0.20327	55.3402	54.3402	0.137592	2.27007	1.73512	3.17794
CsO1 - 54	rim			17.816	0.396594	<5.1777	390.318							0.622324		2566.87	3.56302	0.0714288	<0.056521	20.7132	0.506759	7.67384	13.4598	2.46312	66.8111	21.0706	245.683	88.7632	410.51	83.7048	739.155	136.338	9024.19	1.02205	576.922	653.046	0.883433	3.00857	0	0.251111	49.4092	48.4092	0.221497	296.096	295.096	0.467633	1.68493	2.46996	3.11014
CsO1 - 56	rim			17.712	0.377671	<4.954	234.03							0.465428		808.318	2.64218	<0.077536	<0.040632	13.0753	0.0459305	0.901908	2.13992	0.448122	13.2232	4.75947	63.557	25.4545	133.394	30.7255	304.508	61.8491	11186.4	1.31198	260.343	495.584	0.525325	4.7911	0	0.257545	601.347	600.347	0.213641	284.992	283.992	0.163135	2.7784	2.45331	4.03302
CsO1 - 57	rim			16.98	0.325252	<5.1251	451.527							0.976976		2107.07	3.93926	0.0781682	2.05108	25.0866	0.82522	5.93931	8.37084	1.65038	45.3149	15.0496	189.101	71.2583	340.141	71.9689	656.393	123.278	9782.64	1.1748	531.316	648.282	0.819575	3.47112	0	0.259062	104.98	103.98	0.202645	284.418	283.418	0.305574	2.01695	2.45243	2.89519
CsTb1 - 2	rim of 1			17.368	0.396912	<5.7	242.826							0.482489		737.872	2.69908	<0.076966	<0.034971	11.0299	0.0451972	0.788131	1.79352	0.401907	11.5239	4.24871	57.4021	23.0138	120.858	28.6105	286.979	57.6848	10628.5	1.35159	347.498	680.181	0.51089	4.99946	0	0.270268	632.362	631.362	0.217987	372.642	371.642	0.180341	2.80028	2.57013	4.17751
CsTb1 - 3	rim			17.187	0.332219	<5.4491	194.797							0.366185		1193.97	2.08567	<0.077271	<0.029612	10.7816	0.084491	1.49901	4.09267	0.722446	21.6311	7.78811	99.63	38.8071	196.69	44.693	436.374	84.8509	10770.3	0.967174	253.441	530.499	0.477741	4.37994	0	0.23474	236.425	235.425	0.208142	304.894	303.894	0.238424	2.37185	2.48272	3.79787
CsTb1 - 5	rim			17.276	0.234139	<5.425	277.238							0.431248		1202.92	5.01717	<0.061328	<0.024964	12.1264	0.0724386	0.966264	2.83295	0.379862	18.8961	7.22932	99.0101	39.6927	203.885	46.132	438.567	83.7651	11244.3	2.2842	388.449	921.377	0.421596	4.42951	0	0.158725	538.005	537.005	0.135687	313.555	312.555	0.122163	2.72998	2.49493	4.10447
CsTb1 - 6	rim			17.429	0.286503	<5.3532	237.104							0.382144		713.794	2.62565	0.117799	<0.05489	11.897	0.0524	0.810566	1.77849	0.368746	12.4042	4.0694	55.6602	22.3661	120.26	28.0909	281.153	57.3995	10671.1	1.24505	284.424	618.03	0.460211	5.05124	0	0.240017	649.597	648.597	0.199002	347.044	346.044	0.157004	2.81197	2.53913	4.07168
CsTb1 - 7	core/inner part of 6			17.021	0.293153	<5.3339	211.834							0.294425		732.094	2.7902	<0.062579	<0.042995	12.057	0.0474716	0.76986	2.12364	0.397348	11.5524	4.18287	57.6795	23.5426	121.652	28.3049	282.067	56.2718	11105.9	1.3452	276.506	563.391	0.490788	4.89024	0	0.245255	633.859	632.859	0.209926	456.601	455.601	0.189055	2.80131	2.65858	4.07438
CsTb1 - 8	rim		shorter avoid apatite	17.103	0.540408	<7.4489	253.51							0.341745		900.191	2.46679	<0.12164	0.142174	14.0679	0.0870707	1.22563	2.72596	0.608506	16.4175	5.70506	74.8436	29.601	151.055	34.0903	333.865	67.6166	10329.8	1.20663	244.63	455.77	0.53674	4.46083	0	0.278084	419.035	418.035	0.232823	323.558	322.558	0.21388	2.62121	2.50861	3.71887
CsTb1 - 9	core/inner part of 8		shorter avoid apatite	17.679	0.397308	<5.3912	239.65							0.353683		1145.13	2.76136	<0.07182	<0.047628	13.7834	0.0602765	1.4588	3.92047	0.732352	20.1514	7.6265	95.2442	37.1466	188.812	43.244	435.844	83.0367	10914.9	1.3275	241.505	480.655	0.50245	4.57607	0	0.251896	319.073	318.073	0.219296	288.827	287.827	0.218704	2.50253	2.45913	3.90169
CsTb1 - 11	rim		shorter avoid melt	17.208	0.371122	<5.2542	208.769							0.654096		840.981	3.64552	0.0862584	<0.03712	9.44121	0.0440134	0.374518	1.65209	0.370173	11.6118	4.24564	61.3521	26.5308	145.668	35.3406	367.073	76.5558	11062.1	1.83511	168.207	517.874	0.324803	5.98305	0	0.258381	1515.14	1514.14	0.239993	467.776	466.776	0.161008	3.18017	2.66911	4.07064
CsTb1 - 12	rim			17.363	0.371804	<5.1523	272.569							0.312782		1112.6	2.67595	<0.064314	<0.039235	13.118	0.0647076	1.76101	3.55158	0.746004	20.6868	6.87954	90.7745	36.2464	184.194	42.7426	418.796	81.6832	9830.13	1.08811	194.944	369.463	0.527642	4.61358	0	0.266077	263.352	262.352	0.219849	173.993	172.993	0.189317	2.41888	2.23803	3.75662
CsTb1 - 14	rim of 12		shorter avoid apatite	17.139	0.266861	<6.9081	189.598							0.404757		828.037	3.21079	0.126397	0.0594303	12.4343	0.070788	1.14654	2.0445	0.335838	13.8624	4.89106	65.4428	26.5749	136.998	32.2738	322.181	64.8292	11046	1.59664	307.782	671.834	0.458122	4.92309	0	0.192859	477.524	476.524	0.148178	158.642	157.642	0.0969611	2.67808	2.19767	3.9773
CsTb1 - 19	rim of 17	few common-Pb	shorter avoid melt	17.314	0.541085	<5.7382	285.128							0.329266		906.894	3.45267	<0.084408	<0.03036	13.6191	0.0612525	0.940009	2.19491	0.493766	16.9154	5.63039	77.0568	30.2403	155.35	34.3445	340.312	63.7972	10783.6	1.38778	272.205	524.785	0.518698	4.41638	0	0.24774	587.121	586.121	0.210206	701.754	700.754	0.244137	2.76799	2.84557	3.93286
CsTb1 - 20	core/inner part			17.305	0.396371	<5.3779	319.739							0.569299		1841.6	4.34919	<0.078818	<0.044661	14.9769	0.111196	2.6182	6.49725	0.996362	33.6846	11.5962	151.821	60.8331	305.156	68.7971	656.011	126.761	10459	1.7672	396.222	828.23	0.478395	4.32096	0	0.205902	182.56	181.56	0.179403	220.103	219.103	0.200009	2.25902	2.34065	3.87206
CsTb1 - 22	core/inner part	few common-Pb		17.35	0.423907	<5.2757	270.32							0.597237		1430.65	1.72203	<0.080695	<0.036854	9.89336	0.14872	2.77262	5.8557	1.19433	32.079	10.3712	128.625	48.1242	230.328	49.9811	465.087	88.7905	10250.1	0.72736	203.648	381.066	0.534415	3.61584	0	0.266409	88.9157	87.9157	0.235934	98.6369	97.6369	0.258318	1.94407	1.98961	3.40863
CsTb1 - 23	rim			17.685	0.428717	<5.2068	202.243							0.551758		913.272	3.92938	0.0611255	<0.028122	13.5362	0.0319324	0.793818	2.00467	0.383672	14.601	5.32941	72.4952	28.8519	153.067	35.5356	349.793	68.9982	11481.6	2.04464	521.042	985.474	0.528723	4.82505	0	0.216806	797.12	796.12	0.180049	491.864	490.864	0.158319	2.90098	2.69096	4.48941
CsTb1 - 25	core/inner part		shorter avoid apatite	17.823	0.41775	<5.9334	311.405							0.532272		994.308	1.77121	<0.084517	<0.046285	11.7303	0.0894074	1.47973	3.34729	0.595983	20.0896	6.81122	86.4662	33.2299	163.535	35.521	342.384	66.4727	10367	0.944331	165.313	314.232	0.526084	3.95974	0	0.22219	241.324	240.324	0.19307	336.9	335.9	0.230269	2.3808	2.52621	3.54588
CsTb1 - 31	rim of 29			17.096	0.312481	<5.2048	317.613							0.585504		1235.23	3.46792	0.115713	<0.032918	18.087	0.122128	2.11488	3.88588	0.869879	23.2425	8.07064	106.146	41.3949	204.936	44.3448	416.533	78.485	9278.55	1.26904	411.304	577.333	0.712421	3.92417	0	0.279831	272.7	271.7	0.224696	372.427	371.427	0.267265	2.43409	2.56987	3.67461
CsTb1 - 32	rim			17.588	0.332403	<5.1156	233.693							0.515065		738.496	2.78427	<0.067858	<0.039771	13.6484	0.0556322	0.734878	2.01666	0.418657	12.2191	4.52478	60.0194	23.742	124.022	28.7637	285.938	55.0406	10711	1.23789	218.843	461.24	0.474468	4.76409	0	0.257838	752.649	751.649	0.221298	609.151	608.151	0.2149	2.87602	2.78401	3.9186
CsTb1 - 33	rim		shorter avoid apatite	17.298	0.487962	<5.0753	220.968							0.528799		867.561	3.18881	<0.069777	<0.032943	12.4295	0.0440012	0.804803	2.09047	0.426814	14.4164	5.0459	67.6869	27.4136	143.797	33.5242	337.019	66.3996	11079.7	1.61047	283.405	657.394	0.431104	4.97909	0	0.23769	682.434	681.434	0.202798	253.763	252.763	0.145036	2.83342	2.40271	4.17436
CsTb1 - 36	rim			17.753	0.338817	<5.3015	273.861							0.428771		956.606	3.1309	0.083056	<0.042071	16.0421	0.0608162	1.28304	2.41683	0.623376	16.4232	5.80389	76.8409	30.6315	162.63	37.2165	372.782	73.9253	9897.38	1.28085	252.387	476.189	0.530014	4.85134	0	0.302498	535.972	534.972	0.236966	574.022	573.022	0.245003	2.72833	2.75817	3.89376
CsTb1 - 37	rim	few common-Pb	shorter avoid apatite	17.021	0.358723	<5.8575	281.518							0.512177		775.656	2.078	<0.071018	0.0344956	8.38239	0.0391097	0.826148	2.04556	0.402727	13.64	4.80111	63.575	25.3373	129.727	29.6231	286.329	57.0622	10010.1	0.986154	174.002	407.254	0.427257	4.5038	0	0.233088	402.61	401.61	0.198434	164.446	163.446	0.148121	2.6038	2.21337	4.01758
CsTb1 - 38	rim	few common-Pb	shorter avoid La incl.	17.246	0.272772	<5.2041	278.869							0.479872		1295.46	5.44715	<0.084926	0.0995508	18.5939	0.108496	1.41691	3.47423	0.573942	22.2673	8.43954	110.117	42.9372	210.75	47.1542	450.656	82.9355	10737.3	2.25083	688.903	1095.38	0.628916	4.09254	0	0.199494	473.876	472.876	0.167341	585.411	584.411	0.200085	2.67475	2.76672	4.00415
CsTb1 - 41	core/inner part			17.608	0.273554	<5.1799	236.169							0.350976		986.152	3.59675	0.069609	<0.037396	11.4054	0.0388259	1.08583	2.543	0.452978	16.354	5.83335	79.1073	31.6091	164.053	37.8717	367.416	69.9287	9770.42	1.49726	266.98	563.442	0.473838	4.64452	0	0.214741	428.188	427.188	0.177613	341.328	340.328	0.172247	2.63062	2.5319	4.16173
CsTb1 - 43	core/inner part	high common-Pb		17.199	0.385243	<5.4163	232.582							0.552045		1114.87	2.80392	0.188618	0.0698856	17.6617	0.105534	1.60605	4.29458	0.709114	22.9273	7.40282	96.0664	37.1957	182.121	39.2939	367.665	70.5477	10349.5	1.13231	182.664	317.394	0.575512	3.82719	0	0.218476	298.784	297.784	0.202267	458.098	457.098	0.254044	2.4739	2.66001	3.47821
CsTb1 - 52	rim			16.959	0.253423	<5.155	317.551							0.536558		1368.92	6.16208	<0.06605	<0.0372	10.2865	0.0510812	0.849974	2.48165	0.425674	19.4955	7.97257	112.304	45.0952	232.164	52.326	493.518	93.7627	11988.5	2.83107	458.162	1188.51	0.385492	4.39448	0	0.187096	614.828	613.828	0.153609	262.422	261.422	0.12698	2.78805	2.41734	4.36674
EG2 - 2	rim			16.736	0.318577	<5.0408	275.088							0.481443		997.821	3.85947	<0.076871	<0.03761	15.6553	0.0575089	1.14771	2.73809	0.50994	16.1118	5.60096	76.5247	32.019	170.799	39.2745	400.135	80.799	10461.8	1.74921	431.27	815.313	0.528963	5.22883	0	0.234718	591.555	590.555	0.194508	272.657	271.657	0.144427	2.77126	2.43402	4.15159
EG2 - 3	rim of 2			17.299	0.487804	<5.1019	245.856							0.307528		1001.35	3.24219	0.0985519	<0.070983	12.5095	0.0479547	1.0509	2.78127	0.672474	16.354	5.90707	77.9304	32.1576	173.187	40.4649	411.188	84.9279	10340	1.33803	226.047	513.723	0.440018	5.27636	0	0.304835	521.945	520.945	0.258688		-1		2.71679	#NUM!	4.0299
EG2 - 4	core/inner part			16.955	0.377669	<5.2104	252.684							0.526207		853.027	3.08873	<0.080454	0.238143	13.4018	0.113618	1.30737	2.06959	0.478198	14.2059	5.32617	69.5559	27.8912	144.216	32.1095	317.891	61.8071	10899.8	1.35877	312.124	579.907	0.538232	4.5703	0	0.269621	432.691	431.691	0.19826	228.264	227.264	0.158645	2.63517	2.35653	3.70791
EG2 - 5	rim			17.471	0.312415	<5.1807	299.034							0.689521		1322.55	3.6615	0.144073	0.201394	14.017	0.103693	1.85004	3.84438	0.878662	24.0449	8.19351	107.962	43.2716	222.314	50.3402	495.126	97.0148	10013.8	1.53499	269.836	546.032	0.494176	4.58609	0	0.279396	283.456	282.456	0.230008	339.032	338.032	0.251487	2.45095	2.52896	3.72147
EG2 - 6	rim			17.67	0.259264	<5.0358	326.747							0.600941		1481.09	7.74082	0.0804088	0.048558	13.1174	<0.031535	0.775513	2.55238	0.408313	21.6076	8.53747	121.248	49.4524	253.715	56.9855	550.399	106.461	12001.1	4.66878	604.677	1647.32	0.367067	4.53946	0	0.168089	905.063	904.063	0.143469	1124.61	1123.61	0.178022	2.9562	3.05062	#VALUE!
EG2 - 8	rim		apatite avoided	17.466	0.370508	<5.45	245.118							0.487885		879.608	3.23672	0.100426	0.307148	12.4705	0.0990254	1.137	2.47582	0.399771	14.2006	4.89481	68.5963	28.1297	149.044	35.2443	353.908	69.3022	11573.8	1.76171	305.732	730.215	0.418687	5.15928	0	0.206121	466.559	465.559	0.166633	138.548	137.548	0.105084	2.66797	2.13846	3.8677
EG2 - 9	rim of 8		apatite avoided	17.911	0.324873	<6.7678	312.349							0.527103		777.712	3.04263	<0.086672	0.16169	10.3141	0.0549169	0.896891	1.82164	0.318007	11.4102	4.41267	59.9626	24.674	131.342	30.4523	303.638	62.3664	11055	1.58691	336.117	757.868	0.443503	5.06378	0	0.213247	551.652	550.652	0.162575	266.531	265.531	0.12283	2.74088	2.42411	4.13989
EG2 - 10	rim			17.719	0.391402	<5.3515	257.144							0.478866		732.265	2.67744	0.122214	<0.040098	10.9979	0.0261683	0.607345	1.87555	0.368284	11.5065	4.24143	57.314	23.1997	122.027	28.3683	284.345	57.2537	10589.3	1.22819	144.117	355.911	0.404925	4.96118	0	0.242365	791.26	790.26	0.212795	393.086	392.086	0.169601	2.89777	2.59338	4.13357
EG2 - 12	rim			17.445	0.312418	<5.0424	284.553							0.811341		1055.35	4.54372	<0.063649	0.385391	12.0382	0.180363	1.13273	2.0102	0.367666	14.5277	5.33871	76.4869	32.9626	182.252	43.738	444.924	94.6149	11229.8	2.17415	220.632	629.896	0.350267	5.817	0	0.207998	644.648	643.648	0.150368	492.841	491.841	0.130426	2.80865	2.69182	3.54312
EG2 - 13	rim			17.824	0.331811	<5.3294	314.538							0.653919		1488.44	5.96653	<0.073223	<0.043267	20.4852	0.0700812	1.63248	3.60617	0.665927	24.2547	8.7755	121.924	49.0727	254.947	57.619	550.745	107.277	9679.03	1.8009	335.916	647.82	0.518534	4.51711	0	0.217686	538.274	537.274	0.174767	659.107	658.107	0.199456	2.7302	2.8183	3.96585
EG2 - 14	rim			17.527	0.351617	<5.1199	307.247							0.522462		1039.97	4.21525	<0.078847	<0.042736	14.1944	0.0581403	1.24057	2.39929	0.52859	14.9731	5.56779	76.8845	33.1051	182.928	43.0163	445.627	92.8309	10086.8	1.68664	231.009	560.286	0.412305	5.79606	0	0.269615	612.328	611.328	0.201888	149.582	148.582	0.113563	2.78627	2.17197	3.98393
EG2 - 15	core/inner part	few common-Pb		17.705	0.470609	<5.1566	380.48							0.490693		852.892	1.49883	<0.072722	<0.042969	5.42978	0.038579	0.920944	2.42249	0.533836	14.8907	5.3364	71.5132	28.2787	146.162	32.1294	309.127	61.8887	9689.4	0.602215	90.2705	229.745	0.392915	4.32266	0	0.271733	221.954	220.954	0.234061	59.912	58.912	0.15016	2.3443	1.7702	3.7749
EG2 - 16	rim			17.773	0.456954	<5.1693	236.378							0.351942		618.936	1.99662	<0.095955	<0.056388	8.72382	0.0478583	0.763407	1.7146	0.366985	10.1079	3.66974	50.0945	20.3088	106.919	23.8416	231.482	46.0648	9751.31	0.769166	146.785	278.523	0.527011	4.6209	0	0.269501	460.813	459.813	0.21842	161.919	160.919	0.150995	2.66258	2.20661	3.7649
EG2 - 17	rim			16.961	0.272591	<4.9983	419.733							0.645692		2332.45	7.90835	0.125428	0.12133	32.9039	0.199441	2.65409	6.32692	1.43883	41.9064	14.4967	198.069	77.844	385.144	83.8364	781.078	146.696	9390.97	2.17655	1015.44	1096.26	0.926281	3.94346	0	0.270145	434.927	433.927	0.229852	1035.38	1034.38	0.35178	2.63742	3.01468	3.7401
EG2 - 19	rim			17.25	0.332047	<5.1671	367.149							0.61031		1317.29	4.26971	0.142364	0.288298	13.3344	0.211284	1.97676	3.3955	0.707912	21.9446	7.70394	109.835	43.9619	222.602	49.6238	474.505	91.4402	9604.67	1.5387	280.42	578.954	0.484357	4.32018	0	0.250719	270.769	269.769	0.189867	214.124	213.124	0.180038	2.43099	2.32863	3.43778
EG2 - 21	rim			17.06	0.31206	<5.122	366.085							0.671998		2010.11	6.74251	<0.089719	<0.039391	22.0415	0.10855	2.46414	5.32113	1.06727	31.2176	11.5967	162.077	66.586	342.512	74.1978	703.343	133.468	9057.23	1.74656	451.218	740.726	0.609157	4.33956	0	0.253162	351.114	350.114	0.200501	728.806	727.806	0.281965	2.54421	2.86202	3.83403
EG2 - 23	rim			17.985	0.437129	<5.1242	260.714							0.414589		695.116	2.54932	0.0760061	<0.050045	11.616	0.0412635	0.747	1.69671	0.329843	11.3832	4.19391	54.8898	22.8642	120.3	27.2472	275.261	54.6684	10977.4	1.14857	193.705	418.406	0.46296	5.0148	0	0.229454	699.726	698.726	0.185573	177.284	176.284	0.113303	2.84431	2.24621	4.00603
EG2 - 24	rim			17.585	0.383245	<5.1542	392.631							0.752187		1654.85	5.01606	0.207709	0.0402096	20.7679	0.0956157	2.18741	5.28087	1.19444	32.1294	11.2326	144.603	55.1602	271.116	56.5296	521.879	98.7404	9049.81	1.47838	688.501	717.876	0.95908	3.60904	0	0.280339	278.899	277.899	0.245402	159.801	158.801	0.219259	2.44389	2.20085	3.87552
EG2 - 25	rim			17.627	0.476456	<5.1987	264.089							0.544229		915.024	3.33454	<0.081899	0.0960442	13.261	0.0384956	0.91372	2.45964	0.51406	15.3454	5.41897	74.8843	29.8694	156.373	34.9024	337.928	67.5141	9749.54	1.2391	131.576	302.555	0.434882	4.51267	0	0.255808	583.124	582.124	0.220038	268.302	267.302	0.172294	2.76502	2.427	3.89539
EG2 - 26	rim			17.425	0.482824	<5.2791	297.963							0.56118		1270.34	1.93291	<0.098755	<0.042999	9.34102	0.154328	2.46236	4.97312	1.17543	27.1043	9.18054	114.482	43.6971	212.202	45.2303	426.222	81.0593	9428.98	0.723269	187.887	333.026	0.564181	3.72306	0	0.309519	101.306	100.306	0.264195	107.859	106.859	0.284409	2.00133	2.02881	3.33403
EG2 - 27	core/inner part			17.926	0.31217	<7.9137	394.257							0.546756		1220.74	4.61988	<0.11956	0.856755	11.9415	0.238297	1.98055	3.24137	0.43827	18.2858	6.58532	96.0175	38.1207	210.103	47.2583	475.441	100.015	10910.9	2.51094	247.181	721.809	0.342447	4.9516	0	0.174038	272.285	271.285	0.126975	143.306	142.306	0.094423	2.43343	2.15322	3.4813
EG2 - 28	rim			17.188	0.292666	<5.0977	282.738							0.385544		1364.04	5.53342	0.0607182	<0.038462	19.3584	0.101069	1.46737	3.50546	0.667479	21.7678	7.85482	108.583	44.3369	232.947	51.6134	502.2	98.103	10381.7	1.78493	470.906	761.406	0.618469	4.62502	0	0.233604	548.515	547.515	0.191937	357.829	356.829	0.171375	2.7384	2.55246	3.877
EG2 - 30	rim			17.273	0.298715	<5.2123	251.582							0.491011		963.354	3.57664	0.0953862	0.194347	16.9531	0.108477	1.13033	2.35234	0.573606	17.0865	5.74536	77.905	31.4106	160.739	36.6585	363.851	72.1927	10423.8	1.62058	543.314	876.084	0.620162	4.67044	0	0.276605	633.033	632.033	0.225784	351.243	350.243	0.18607	2.80074	2.54437	3.90721
EG2 - 31	core/inner part			16.858	0.428046	<5.1306	393.958							0.674907		2338.82	8.01323	<0.086961	<0.051258	31.145	0.121366	2.51173	6.09124	1.38258	38.0578	13.8904	190.908	77.0929	392.808	84.5386	807.314	154.289	9537.01	2.31534	832.608	1078.02	0.772352	4.22882	0	0.277613	475.408	474.408	0.230317		-1		2.67615	#NUM!	3.94853
EG2 - 33	rim		melt avoided late	17.314	0.331395	<5.1045	298.238							0.767123		1334.67	5.95259	<0.10112	0.0734291	16.2627	0.0982992	1.21374	2.85041	0.536724	19.2594	7.40742	104.336	42.4873	229.642	52.5549	521.272	103.959	11146.7	2.43637	338.908	861.772	0.393268	4.99607	0	0.221462	676.46	675.46	0.174194	152.539	151.539	0.102841	2.8296	2.18052	3.94284
EG2 - 36	rim			17.425	0.306035	<5.2148	328.328							0.626428		1180.25	3.80965	0.124449	0.0730847	15.8268	0.0873584	1.43212	3.50139	0.596611	20.79	7.32303	97.1485	38.7764	196.063	42.2719	407.053	79.4246	9650.82	1.34342	364.486	553.284	0.658768	4.19001	0	0.21378	383.561	382.561	0.182842	595.895	594.895	0.228613	2.5827	2.77444	3.80164
EG2 - 38	rim of 37			18.029	0.91632	<5.204	288.873							0.458495		748.835	2.2833	0.107655	<0.034615	10.9897	<0.029664	0.83621	2.48849	0.509923	14.9811	5.15276	66.8971	24.7947	119.636	24.6592	224.849	41.8242	9948.77	0.800852	70.5963	128.715	0.548472	3.36111	0	0.255323	353.934	352.934	0.239988	257.447	256.447	0.243299	2.54769	2.409	#VALUE!
EG2 - 39	core/inner part			17.144	0.344237	<5.2105	438.554							0.868364		2550.68	5.63917	<0.09605	<0.056653	24.296	0.281555	4.60874	9.18847	1.65512	54.1853	17.7609	226.387	86.2216	413.808	88.3532	825.132	155.595	9914.2	1.82742	649.092	970.399	0.668892	3.64478	0	0.226773	143.214	142.214	0.194123	297.105	296.105	0.272851	2.15294	2.47145	3.53739
EG2 - 40	core/inner part of 39			17.924	0.377327	<5.1799	297.194							0.496521		1060.93	3.76389	<0.079392	<0.056811	11.4462	0.0354099	1.0579	2.49963	0.528109	17.316	6.15081	85.2929	34.9535	179.221	40.4316	399.996	77.3813	10900.6	1.6578	240.507	592.877	0.405661	4.68968	0	0.245406	474.74	473.74	0.201553	303.893	302.893	0.180212	2.67554	2.48129	4.22384
EG2 - 43	rim			17.121	0.253329	<5.1083	311.211							0.40321		1240.98	4.54524	<0.088034	0.0879882	16.6411	0.0798195	1.36016	3.34722	0.669641	20.5573	7.6292	101.437	39.7258	207.068	46.6129	461.038	89.0864	10921.2	2.18489	628.32	1068.99	0.587772	4.54507	0	0.246797	482.324	481.324	0.206042		-1		2.68244	#NUM!	4.12686
EG2 - 44	rim			18.317	0.456963	<5.2017	210.388							0.453387		1119.86	2.49134	<0.086757	<0.047764	16.0579	0.0878345	1.8608	4.15464	0.730189	23.4237	7.92116	99.3325	37.7822	181.264	39.0111	359.322	68.1266	10145.1	1.0496	165.601	273.683	0.605082	3.61737	0	0.226289	230.129	229.129	0.19862		-1		2.36008	#NUM!	3.49358
EG2 - 45	rim			18.085	0.410512	<5.1734	276.82							0.588229		1285.84	3.91394	0.113253	<0.047208	15.4493	0.0723153	1.6519	3.89459	0.805964	22.4728	7.74273	107.285	41.8236	214.072	46.2187	432.835	83.9897	9250.48	1.23221	355.72	517.272	0.687683	4.03444	0	0.263378	317.446	316.446	0.223269	492.734	491.734	0.280139	2.5003	2.69173	3.85449
EG2 - 46	rim			17.103	0.318866	<5.1637	302.773							0.688807		1125.32	5.67578	<0.079832	<0.034427	9.61937	<0.025347	0.49377	2.03809	0.396201	15.2085	6.16121	87.7504	36.3005	196.636	45.5534	457.419	92.8503	11204.4	2.83774	163.554	704.1	0.232289	5.21273	0	0.217563	1140.51	1139.51	0.193779	541.311	540.311	0.160386	3.05672	2.73264	#VALUE!
EG2 - 48	rim		apatite avoided	17.484	0.266756	<7.2339	292.606							0.336132		934.764	4.03317	0.118103	<0.069444	8.81764	<0.038455	0.662659	2.17633	0.355698	13.3415	4.6976	69.6543	29.5788	161.981	38.4271	387.546	81.8061	10308.9	1.96268	164.566	535.935	0.307064	5.56386	0	0.201809	698.303	697.303	0.175907	462.231	461.231	0.151663	2.84342	2.66392	#VALUE!
EG2 - 50	rim			17.89	0.364037	<5.0662	214.987							0.436096		841.754	3.37916	<0.08201	<0.038843	10.5949	0.0412847	0.638132	1.85517	0.372621	12.5294	4.75542	65.6693	26.4641	143.45	33.4849	338.064	67.6027	11166.8	1.82346	329.707	743.413	0.443505	5.14799	0	0.236284	828.269	827.269	0.199226	59.3994	58.3994	0.0767973	2.91765	1.76641	4.25544
EG2 - 51	rim of 50			17.116	0.312486	<5.4035	256.697							0.497319		999.824	3.89383	0.115375	<0.067194	14.8993	0.0520739	1.04692	2.21823	0.413618	14.6285	5.61083	77.7905	31.7061	169.574	39.6308	399.722	80.3839	11159	1.90993	284.434	613.727	0.463453	5.13844	0	0.221983	712.793	711.793	0.170634	693.724	692.724	0.170474	2.85235	2.84056	4.07136
EG2 - 52	rim			17.367	0.561293	<5.2136	246.63							0.302101		797.841	2.40583	<0.072591	<0.028603	7.70297	0.0371201	0.818246	2.14888	0.508044	14.7982	5.26634	68.1173	26.2828	130.272	29.2821	273.364	52.4271	9566.05	0.900284	160.019	342.733	0.466891	4.01313	0	0.275432	333.289	332.289	0.241672	248.124	247.124	0.237598	2.52152	2.39291	3.96535
EG2 - 54	rim			17.958	0.311256	<5.1398	443.49							1.08475		1290.9	5.96956	0.0760169	1.59467	17.5127	0.699516	3.77258	2.99802	0.48379	20.5688	7.7092	104.659	42.1756	217.841	48.8743	475.878	93.018	11540.2	3.28458	557.544	1311.87	0.424998	4.54693	0	0.188347	205.593	204.593	0.113182	179.052	178.052	0.102627	2.31089	2.25055	3.27309
DEMHAN1 - 1	rim			17.787	0.311218	<5.0791	243.966							0.545628		1277.23	6.56483	<0.084619	<0.032985	13.1375	0.0337074	0.77612	2.22664	0.457874	17.7045	6.69968	97.5183	41.1951	222.062	53.2194	546.317	105.065	10897.2	3.01568	335.783	1006.49	0.333617	5.6022	0	0.222948	1037.48	1036.48	0.181937	687.475	686.475	0.16699	3.01556	2.83662	4.47509
DEMHAN1 - 3	rim			17.559	0.410111	<5.2877	244.752							0.514938		722.652	2.56383	<0.091675	<0.057516	11.6404	0.0582239	0.909022	2.15983	0.428614	11.5644	4.36743	58.0023	23.0814	118.517	27.1867	274.48	52.4503	9784.5	1.05991	253.666	476.273	0.532608	4.73223	0	0.262191	487.167	486.167	0.215595	196.316	195.316	0.156888	2.68679	2.29074	3.91275
DEMHAN1 - 4	rim			17.007	0.285211	<5.0099	345.983							0.637163		1636.58	6.9625	0.171789	<0.040149	27.5386	0.107875	1.84363	4.37182	0.860471	27.1746	9.86963	132.686	52.9151	268.448	61.7733	606.392	112.108	9734.21	2.36607	864.045	1161.24	0.74407	4.57011	0	0.24135	583.065	582.065	0.200227		-1		2.76497	#NUM!	4.032
DEMHAN1 - 6	core/inner part of 56			17.326	0.377084	<5.2837	308.783							0.277439		1135.89	4.59845	0.0998066	<0.057697	11.3771	0.0453764	0.911778	2.48713	0.470878	17.1325	6.43034	86.874	36.6136	194.653	46.8668	484.561	94.0133	10431.2	2.01885	211.607	606.373	0.348972	5.57774	0	0.220532	647.75	646.75	0.182917	480.772	479.772	0.169726	2.81074	2.68103	4.12591
DEMHAN1 - 8	rim			17.353	0.468019	<5.3242	274.196							0.453659		1206.45	4.14076	0.115817	0.0432481	18.7906	0.112235	2.01928	4.30368	0.768537	25.4789	8.49678	107.7	41.5766	199.375	43.6005	401.797	73.5645	9694.88	1.45556	385.535	574.623	0.670935	3.7307	0	0.224377	259.251	258.251	0.193924	253.769	252.769	0.209577	2.41204	2.40272	3.70926
DEMHAN1 - 10	rim			18.053	0.488818	<5.2707	197.441							0.376579		592.609	2.19083	0.102241	<0.042649	9.07029	<0.024751	0.606413	1.62101	0.323873	9.37983	3.36977	47.2272	18.9819	97.7453	23.6033	235.08	46.0342	10127.6	0.991829	127.013	314.371	0.404023	4.97763	0	0.253927	636.604	635.604	0.214968	266.642	265.642	0.158639	2.80319	2.4243	#VALUE!
DEMHAN1 - 11	rim of 10			17.24	0.298819	<5.4589	205.497							0.481307		993.766	4.37362	<0.077491	<0.036423	9.34488	0.0460635	0.665159	1.99719	0.309039	13.1473	5.4421	75.2307	31.3138	171.682	40.5282	415.083	81.4347	11315.3	2.46969	277.134	802.213	0.345462	5.51747	0	0.184378	787.935	786.935	0.150339	443.48	442.48	0.127262	2.89594	2.64589	4.24093
DEMHAN1 - 15	rim			16.951	0.350363	<5.1798	360.92							0.748346		1853.44	6.9815	<0.079321	<0.039085	20.8237	0.106644	1.85332	5.10518	0.932542	33.8511	11.887	160.153	62.0427	309.977	68.1418	651.72	119.512	9959.34	2.45155	609.125	958.902	0.635232	4.06936	0	0.21687	397.862	396.862	0.191712	620.823	619.823	0.253749	2.59864	2.79227	3.95384
DEMHAN1 - 16	rim of 15			17.543	0.279009	<5.1919	376.107							0.335477		1738.54	8.6596	<0.072175	<0.028367	14.1097	0.0687081	1.2184	3.42368	0.615316	26.8975	10.4284	143.349	58.5621	302.666	67.2757	645.736	120.981	10944.9	3.28057	412.682	1056.83	0.390491	4.50465	0	0.196029	558.21	557.21	0.163233	689.743	688.743	0.200341	2.74602	2.83806	4.187
DEMHAN1 - 18	rim			17.951	0.311584	<5.2533	256.298							0.484525		1062.64	4.95168	0.0933684	0.039876	14.8014	0.0482629	0.671442	2.74963	0.524901	17.0763	6.04546	84.5294	34.5864	180.874	41.895	420.82	81.5397	10511.4	2.12064	382.27	831.194	0.459905	4.97839	0	0.234189	957.096	956.096	0.223391		-1		2.9805	#NUM!	4.23609
DEMHAN1 - 19	rim of 18			18.213	0.278718	<5.195	320.127							0.537146		1379.65	6.51426	0.120736	<0.038898	18.6066	0.052802	1.07776	3.38386	0.585706	22.4233	8.29454	113.949	45.3847	233.996	53.0176	520.564	97.8716	10934	3.09775	606.148	1154.7	0.524938	4.56842	0	0.205564	728.19	727.19	0.181329		-1		2.86165	#NUM!	4.33982
DEMHAN1 - 22	rim of 20			17.296	0.298666	<5.2906	319.404							0.509789		1057.67	4.24754	0.134078	<0.040022	13.3333	0.0412868	0.93476	2.0345	0.456797	15.9315	5.84178	81.3569	33.347	179.27	41.7618	421.682	83.8219	11187	2.04974	396.421	866.569	0.45746	5.18311	0	0.245295	764.457	763.457	0.191839	596.918	595.918	0.180729	2.88278	2.77519	4.32199
DEMHAN1 - 27	rim			17.19	0.388892	<5.4081	261.209							0.400661		1172.72	4.76917	<0.069604	<0.034647	12.5429	<0.034706	0.937969	2.51618	0.437831	17.0958	6.65956	92.7731	37.7768	197.459	45.7264	442.024	87.0737	11333.4	2.60595	366.103	997.789	0.366914	4.76457	0	0.204087	646.357	645.357	0.166877	665.052	664.052	0.180355	2.8098	2.8222	#VALUE!
DEMHAN1 - 30	rim			17.057	0.338093	<5.4007	216.347							0.404865		772.449	2.93741	<0.07072	<0.044513	9.45967	<0.0353	0.704539	1.92406	0.336578	11.4842	4.34992	58.8446	24.3857	129.871	30.6989	310.404	63.4062	11680.2	1.56152	257.26	644.474	0.399178	5.27498	0	0.218903	630.956	629.956	0.182515	139.171	138.171	0.10398	2.79931	2.14042	#VALUE!
DEMHAN1 - 33	rim of 32			17.396	0.357702	<5.2624	254.568							0.490098		695.985	2.50251	<0.10531	<0.051836	10.7435	0.0415137	0.723768	1.56736	0.374896	10.3427	3.9377	54.3236	21.9709	116.14	26.9976	271.686	54.3598	11161.3	1.27239	292.107	583.066	0.500985	5.00124	0	0.284665	714.997	713.997	0.221838	118.362	117.362	0.114244	2.8537	2.06953	4.14753
DEMHAN1 - 38	rim of 37			17.949	0.450247	<5.3643	190.773							0.43021		544.806	1.83504	0.0790524	<0.058753	9.90368	0.0344993	0.879664	1.69957	0.380815	9.15379	3.2087	45.493	17.5829	88.6512	20.3076	193.651	38.1215	10971.6	0.846044	137.568	259.211	0.530719	4.25672	0	0.295167	399.949	398.949	0.233919	230.294	229.294	0.191939	2.60092	2.36039	3.87584
DEMHAN1 - 41	rim			17.419	0.357635	<5.385	275.205							0.557097		1716.63	2.07722	<0.074779	<0.040556	11.355	0.168438	3.12794	6.6416	1.19726	35.9658	11.8392	151.467	56.9809	277.741	60.1712	561.152	107.531	10670.8	0.94825	261.059	489.228	0.533614	3.70477	0	0.236827	96.5583	95.5583	0.206131	250.361	249.361	0.310374	1.98027	2.39683	3.46307
DEMHAN1 - 42	core/inner part			17.6	0.513278	<5.4979	349.664							0.572245		1964.25	2.90565	<0.082612	0.132101	22.5634	0.241601	4.23973	8.20025	1.57907	45.3736	14.7803	180.882	66.4778	313.716	65.2471	586.365	109.932	10481.5	1.06912	406.481	538.599	0.7547	3.24169	0	0.25027	120.019	119.019	0.218444	481.311	480.311	0.398753	2.07562	2.68152	3.34817
DEMHAN1 - 46	rim	young outlier		16.605	0.233406	<5.1905	308.383							0.300395		1430.57	6.41403	0.144111	<0.029426	16.3017	0.0658079	1.06021	3.0131	0.544027	22.6571	8.52365	115.399	46.7156	238.85	53.3316	511.221	99.3653	11629.6	3.08466	745.625	1402.73	0.531552	4.43002	0	0.201296	691.47	690.47	0.171542		-1		2.83914	#NUM!	4.3287
DEMHAN1 - 47	rim			16.931	0.364285	<5.2093	270.139							0.347945		807.704	2.52983	<0.083705	<0.038743	13.8057	0.0439119	0.871678	2.26943	0.471426	13.7981	4.93183	64.7542	26.1728	135.915	31.0086	299.514	59.8849	10989.5	1.19183	322.763	567.142	0.569105	4.6254	0	0.257555	616.595	615.595	0.221161	708.41	707.41	0.242063	2.7893	2.84967	4.11111
DEMHAN1 - 48	rim			17.896	0.29253	<5.2399	254.815							0.446587		865.128	2.8694	0.0861003	<0.039683	14.3913	0.0389766	1.08817	2.30824	0.448548	14.6234	5.1938	69.1762	27.8834	143.053	32.864	322.683	64.3727	11245.9	1.424	348.414	612.016	0.569289	4.66466	0	0.23603	533.402	532.402	0.191205	758.017	757.017	0.222385	2.72624	2.87911	4.19596
DEMHAN1 - 50	rim			17.989	0.370957	<5.3635	207.981							0.537922		779.68	3.11086	0.10824	<0.052779	8.3371	<0.030415	0.450524	1.47764	0.261881	10.024	3.96674	55.4342	24.1817	134.227	32.1747	334.214	69.7071	11763.8	1.62631	152.411	451.677	0.337434	6.02902	0	0.208029	1141.86	1140.86	0.174029		-1		3.05723	#NUM!	#VALUE!
DEMHAN1 - 52	core/inner part			17.761	0.451273	<5.3276	219.189							0.392951		680.027	1.78688	<0.0648	<0.050066	8.55938	0.0289926	0.626062	1.91735	0.453833	11.306	4.2375	55.7581	22.4418	109.948	24.953	239.962	47.6901	10010.2	0.777208	83.8454	177.348	0.472772	4.30363	0	0.297999	506.454	505.454	0.264955	271.191	270.191	0.223714	2.70368	2.43167	3.78654
DEMHAN1 - 54	rim			17.615	0.415939	<5.3265	251.352							0.300886		803.098	3.06883	<0.1006	0.0279151	11.4583	0.0247252	0.738755	1.74041	0.475956	13.0112	4.60784	62.7361	25.0304	132.024	31.1915	310.223	62.1438	11549.5	1.43011	309.66	655.76	0.472216	4.94489	0	0.305778	736.274	735.274	0.251485	390.849	389.849	0.204647	2.86645	2.5909	4.42361
DEMHAN1 - 59	rim of 58			16.973	0.246486	<5.2274	238.982							0.492675		1129.69	4.6635	0.151046	<0.047948	11.7752	<0.027705	0.803401	2.30252	0.438403	16.1743	6.35418	87.6549	36.2069	187.188	43.1194	419.788	80.7295	11498.2	2.43598	548.385	1274.36	0.430321	4.78911	0	0.219626	715.989	714.989	0.182404	217.894	216.894	0.127114	2.8543	2.33625	#VALUE!
DEMHAN1 - 60	rim			18.076	0.443474	<5.2628	285.068							0.303079		797.262	2.25973	0.062871	0.135728	7.28445	0.0637978	1.0247	2.21171	0.546588	13.1941	5.01309	64.783	26.5746	136.03	30.163	291.437	56.8188	9718.26	0.909575	128.901	314.311	0.410105	4.49867	0	0.309336	275.183	274.183	0.247731	101.764	100.764	0.177274	2.43804	2.0033	3.69255
DEMHAN1 - 61	rim			17.113	0.305348	<5.416	234.798							0.367055		1018.27	3.72336	<0.094304	<0.030734	14.655	0.0587574	1.22053	2.9007	0.529856	16.6957	6.09055	82.7085	32.7143	170.711	38.6818	381.911	73.781	11052.7	1.59081	372.892	669.336	0.557108	4.61755	0	0.23277	467.079	466.079	0.192534	375.642	374.642	0.183784	2.66846	2.57362	4.05658
Mt1chage - 1			shorter avoid apatite	17.379	0.327613	<6.8098	442.433							0.456113		1692.81	2.56184	<0.094292	<0.053909	13.3873	0.152035	3.05676	6.3941	1.02462	34.048	11.3259	147.821	55.9488	277.238	59.6848	564.416	109.312	10513.9	1.01082	349.991	625.352	0.55967	3.81824	0	0.212301	122.462	121.462	0.181732	65.1081	64.1081	0.148432	2.08444	1.80691	3.61418
Mt1chage - 2			shorter avoid apatite	17.726	0.432105	<6.0134	416.8							0.657954		1464.16	2.6842	<0.11565	<0.042923	12.3182	0.143679	2.23659	4.85038	0.868888	26.5539	9.35204	123.737	49.0341	246.862	54.4436	520.412	100.728	10858.8	1.03692	322.227	598.894	0.538038	4.20579	0	0.234064	182.381	181.381	0.194438	270.866	269.866	0.234349	2.25859	2.43115	3.61996
Mt1chage - 4			zoned (U, Th,Yb, Lu, Y	17.615	0.440313	<5.9729	349.138							0.296786		1111.75	2.22908	0.0949018	<0.050341	8.89871	0.0625452	1.4692	3.06989	0.655503	19.0183	7.12316	92.7421	36.4774	184.895	40.8374	388.189	75.7486	10119.5	0.82855	179.719	371.384	0.483917	4.18568	0	0.262271	222.816	221.816	0.210774	83.9364	82.9364	0.153248	2.34599	1.91875	3.77363
Mt1chage - 5			shorter avoid melt	17.712	0.385886	<6.1894	407.922							0.646625		2546.52	5.05706	0.207274	0.0719782	23.1357	0.314087	6.12169	11.1861	2.07543	59.8818	18.88	236.981	88.7552	419.287	89.0149	815.466	148.423	9668.73	1.33577	552.734	741.559	0.745368	3.44106	0	0.245156	87.0086	86.0086	0.210908	294.681	293.681	0.357798	1.93454	2.46788	3.3731
Mt1chage - 6				17.619	0.453552	<6.5169	382.834							0.676706		1103.33	2.07013	<0.11693	<0.070066	9.07346	0.0556681	1.44993	3.12595	0.621869	19.0386	6.83208	91.2659	36.2295	183.267	40.3416	385.773	77.2006	9348.35	0.744853	177.628	360.862	0.492232	4.22691	0	0.246441	229.649	228.649	0.201465	113.918	112.918	0.160091	2.35917	2.05276	3.81173
Mt1chage - 8			shorter avoid melt	17.96	0.453665	<7.1215	277.827							0.268064		1401.44	1.51505	0.109276	<0.064218	9.42852	0.210916	3.49696	7.21615	1.33155	34.2601	10.823	130.529	48.298	227.332	45.5849	421.472	78.729	9133.53	0.541965	203.082	292.587	0.694091	3.22896	0	0.258901	53.0009	52.0009	0.235058	61.2783	60.2783	0.263979	1.71601	1.78016	3.14215
Mt1chage - 15				17.514	0.531177	<5.9179	494.507							0.548644		1093.44	2.41136	<0.070886	<0.033277	9.23507	0.0664634	0.686851	2.49067	0.520054	16.8985	6.22968	85.0507	35.9984	184.766	41.586	404.177	81.9837	10129.5	0.917214	190.193	450.163	0.422498	4.75219	0	0.24507	612.548	611.548	0.223009	211.26	210.26	0.161824	2.78643	2.32276	3.83079
Mt1chage - 19				17.328	0.341249	<6.2321	341.867							0.432804		1793.3	4.96045	<0.11858	<0.047424	17.6918	0.141681	2.10435	4.55597	1.00766	29.8718	10.6487	147.217	59.5645	297.206	63.2574	594.987	114.026	8835.48	1.28732	310.651	500.564	0.620603	4.04156	0	0.26407	314.937	313.937	0.214367	576.44	575.44	0.291964	2.49684	2.76	3.54815
Mt1chage - 22			shorter avoid melt	18.628	0.307471	<6.3616	431.095							0.550927		2042.64	6.04045	<0.09523	<0.046307	25.1833	0.168275	3.3782	6.33877	1.19335	41.0749	13.6181	179.409	68.8792	331.125	71.3799	656.257	125.405	9556.43	1.59743	557.854	768.196	0.726187	3.65789	0	0.226099	225.928	224.928	0.186804	290.29	289.29	0.21999	2.35204	2.46133	3.65945
EG2gch - 2	rim	n.d.	*	n.d.	n.d.	Below LOD		2.79285	678.645	33.4826	666.175	693.827			508200	1355		Below LOD	Below LOD	13.48	0.119	2.51	5.27	0.941	28.26	9.33	114	44.2	209.2	48.1	471	90.5	10985		300.3	507	0.592308	4.13158	46.2631	0.235734	148.388	147.388	0.205437	205.237	204.237	0.236058	2.16846	2.31013	3.62946
EG2gch - 3	rim	n.d.	*	n.d.	n.d.	Below LOD		3.54881	698.693	34.7227	685.697	714.527			504300	753		Below LOD	Below LOD	12.3	0.0417	0.752	2.12	0.445	12.44	4.51	58.1	24.21	120	29.7	304	59.5	10660		197.6	435	0.454253	5.23236	47.3077	0.264914	675.129	674.129	0.231027	419.287	418.287	0.196531	2.82874	2.62147	4.01835
EG2gch - 5	core/inner part	n.d.	*	n.d.	n.d.	Below LOD		8.55705	780.214	40.0218	764.963	798.842			508100	1623		Below LOD	Below LOD	9.77	0.113	2.06	5.06	1.171	31.3	11.13	142.2	55.1	259	56.9	532	99.4	9340		149	357	0.417367	3.74121	54.4004	0.284468	144.528	143.528	0.248589	48.4441	47.4441	0.181286	2.15694	1.67618	3.49959
EG2gch - 6	core/inner part	n.d.	*	n.d.	n.d.	Below LOD		3.55931	698.946	34.7384	685.942	714.788			509100	1304		0.056	Below LOD	11.45	0.072	1.52	3.73	0.758	23.8	8.39	107.7	43.4	207.6	48.2	470	90.4	9750		237	470	0.504255	4.36397	52.2154	0.245952	269.393	268.393	0.211929	297.176	296.176	0.232817	2.42877	2.47155	3.81477
EG2gch - 11	rim	n.d.	*	n.d.	n.d.	Below LOD		6.00568	745.831	37.7364	731.552	763.252			507800	1196		0.063	Below LOD	9.09	0.052	1.19	2.85	0.613	18.53	7.08	94.2	39.61	194.8	45.83	453.9	88.5	9574		137.5	366.4	0.375273	4.81847	53.0395	0.257884	338.343	337.343	0.208799	157.775	156.775	0.163851	2.52807	2.19528	3.84795
EG2gch - 14	core/inner part	n.d.	*	n.d.	n.d.	Below LOD		5.08173	730.375	36.733	716.523	747.267			502200	2415		0.063	0.0351	18.38	0.442	7.31	12.76	2.359	61.1	19.65	224.8	84.6	367.5	79.6	734	132	9400		460	600	0.766667	3.26512	53.4255	0.258289	47.3784	46.3784	0.226004	167.264	166.264	0.385207	1.66632	2.2208	3.13273
EG2gch - 15	rim	n.d.	*	n.d.	n.d.	Below LOD		4.94524	727.9	36.5738	714.116	744.709			508000	987		Below LOD	Below LOD	14.57	0.058	1.02	2.7	0.605	16.34	5.94	76.8	32.15	157.8	38.65	393.8	76.63	10080		214	444.6	0.481332	5.1276	50.3968	0.278465	592.414	591.414	0.238224	309.995	308.995	0.191019	2.77189	2.48995	3.88454
EG2gch - 16	rim	n.d.	*	n.d.	n.d.	Below LOD		5.7432	741.65	37.4635	727.487	758.927			505100	1427		0.077	Below LOD	22.85	0.119	2.21	4.93	1.033	30.5	10.66	130.1	49.8	220.5	48.3	454	83.2	9792		686	735	0.933333	3.48962	51.5829	0.257543	274.368	273.368	0.225734	285.37	284.37	0.253333	2.43675	2.45388	3.79074
EG2gch - 17	rim	n.d.	*	n.d.	n.d.	Below LOD		3.55931	698.946	34.7384	685.942	714.788			498000	1036.4		0.086	0.026	17.25	0.081	1.31	2.8	0.583	17.26	6.36	82.2	33.9	164.4	38.75	391.2	75.54	10590		477.1	788.5	0.605073	4.75912	47.0255	0.256385	521.403	520.403	0.207076	257.171	256.171	0.162342	2.71634	2.40853	3.98832
EG2gch - 18		n.d.		n.d.	n.d.	Below LOD		3.91629	707.187	35.2555	693.964	723.301			500900	1197		0.058	0.074	18.43	0.088	1.78	3.68	0.732	22.69	8.05	102	40.77	186.9	42.8	410	76.2	10496		439	635	0.691339	4.01961	47.7229	0.244903	330.904	329.904	0.20344	198.305	197.305	0.179207	2.51839	2.29514	3.85829
CsTb1gch - 3	rim	n.d.	*	n.d.	n.d.	Below LOD		5.5962	739.24	37.3067	725.144	756.434			499900	1226		0.073	Below LOD	15.66	0.117	2.29	5.14	0.887	27.5	9.2	109.4	41.8	186.3	41.9	395	72.3	10173		213.1	299	0.712709	3.6106	49.1399	0.228086	161.686	160.686	0.205674	238.72	237.72	0.255965	2.20598	2.37607	3.40749
CsTb1gch - 4	rim	n.d.	(*)	n.d.	n.d.	Below LOD		3.34932	693.774	34.4161	680.908	709.447			491400	1775		0.151	0.0283	32.1	0.12	2.38	5.96	0.867	34.9	12.55	152.3	59.7	274.2	63.2	609	116.3	10882		1280	1521	0.841552	3.99869	45.1571	0.183784	404.996	403.996	0.162761	739.676	738.676	0.217668	2.60638	2.86845	4.10295
CsTb1gch - 9		n.d.		n.d.	n.d.	Below LOD		4.47276	718.878	35.9963	705.339	735.382			498800	1506		0.088	0.083	11.16	0.157	2.94	6.38	1.338	34	11.51	133.4	51.3	233.7	51.8	496	92.6	10260		228	403	0.565757	3.71814	48.616	0.277735	91.1928	90.1928	0.247914	250.307	249.307	0.383114	1.95517	2.39673	3.40941
CsTb1gch - 10		n.d.		n.d.	n.d.	Below LOD		4.95574	728.093	36.5861	714.303	744.907			517200	1034		0.073	0.092	20.7	0.076	1.5	3.32	0.636	18.23	6.7	85.9	33.7	159.3	37.8	379	70.3	10720		350.5	553	0.633816	4.41211	48.2463	0.24993	462.245	461.245	0.207853	233.323	232.323	0.166608	2.66393	2.36609	3.86191
CsTb1gch - 11	rim	n.d.	*	n.d.	n.d.	Below LOD		5.19723	732.427	36.8654	718.519	749.389			502600	833.4		Below LOD	Below LOD	8.73	0.053	1.1	2.59	0.525	14.96	5.51	69.4	28.09	133	31.04	300.6	57.88	9847		172.2	399.5	0.431039	4.33141	51.0409	0.25785	271.92	270.92	0.217763	89.0159	88.0159	0.149425	2.43284	1.94456	3.87724
CsTb1gch - 13	rim	n.d.	*	n.d.	n.d.	Below LOD		2.91885	682.275	33.7053	669.711	697.575			496900	741		Below LOD	Below LOD	11.34	0.0413	0.742	1.95	0.422	11.9	4.49	58.8	23.93	115.7	27.72	288.7	56.4	10722		298	629	0.473768	4.90986	46.344	0.267821	634.232	633.232	0.226272	535.681	534.681	0.217984	2.80156	2.72809	4.1827
CsTb1gch - 16	rim	n.d.	*	n.d.	n.d.	Below LOD		5.49121	737.486	37.1928	723.439	754.621			481300	1907		0.144	Below LOD	40.2	0.151	2.74	7	1.61	40.3	14.2	160.6	62.7	288.2	65.3	640	121.4	9420		2430	2252	1.07904	3.98506	51.0934	0.293054	395.778	394.778	0.268877	579.714	578.714	0.329624	2.59635	2.76246	4.17359
CsTb1gch - 17	core/inner part	n.d.	*	n.d.	n.d.	Below LOD		3.17083	689.164	34.1301	676.419	704.686			506900	1705		Below LOD	0.018	15.6	0.199	3.59	6.86	1.21	35.5	12.2	147.1	57.5	267.8	60.4	597	109.3	10320		360	591.6	0.608519	4.05846	49.1182	0.237046	116.017	115.017	0.199441	255.853	254.853	0.277629	2.06076	2.40629	3.47318
CsTb1gch - 18	core/inner part	n.d.	*	n.d.	n.d.	Below LOD		5.45971	736.955	37.1584	722.922	754.071			503500	797		0.102	0.0146	14.46	0.0347	0.871	2.02	0.384	13.9	5.16	65.6	26.8	123.9	29.29	285.9	54.33	10604		121.1	238.8	0.507119	4.35823	47.4821	0.22155	636.178	635.178	0.184301	328.29	327.29	0.153879	2.8029	2.51493	3.8377
CsTb1gch - 19	rim	n.d.	*	n.d.	n.d.	Below LOD		3.26533	691.631	34.283	678.821	707.233			509600	1295		0.06	0.02	7.66	0.086	1.62	4.25	0.833	25.6	8.94	113.1	44.5	204.2	46.6	452	84.8	10427		169.5	409.4	0.414021	3.99646	48.8731	0.244149	145.512	144.512	0.218784	160.259	159.259	0.245385	2.1599	2.2021	3.67765
Bogács unit
LR-01_Td-H2Ngch - 1	rim		ok	16.69		<3.1448	271.311	11.5031	810.779	42.1153	794.636	830.513	0.229568		466813	779.002	1.51161	<0.10869	<0.033581	4.72306	0.0580125	1.24923	2.4597	0.68131	14.7335	5.04226	66.7598	26.1489	128.496	28.2787	257.257	49.435	7349.14	0.455677	69.725	165.703	0.420783	3.85348	63.5194	0.345999	119.649	118.649	0.284181	98.538	97.538	0.280416	2.07427	1.98917	3.45581
LR-01_Td-H2Ngch - 2	rim of 1		ok,fewBa	16.63		<3.1059	282.251	12.0433	815.679	42.4563	799.391	835.594	0.236904		472815	1181.66	2.5362	4.18633	0.0467239	6.06385	0.0876366	1.40978	3.14948	1.00764	19.3938	7.03407	95.4532	39.9084	200.641	43.9326	412.729	77.2247	7199.86	0.675137	81.8687	201.055	0.407195	4.32389	65.67	0.394164	164.001	163.001	0.319998	125.342	124.342	0.313178	2.21219	2.09462	3.36063
LR-01_Td-H2Ngch - 3	rim		ok	16.97		<3.1388	252.056	11.5728	811.421	42.1599	795.259	831.179	0.194689		474596	903.533	2.10364	<0.11024	<0.036039	5.96031	0.0716615	1.10322	2.85905	0.745791	16.5901	5.87354	76.0136	30.8107	153.842	33.8139	306.969	59.5399	7757.21	0.680003	63.6381	157.217	0.404778	4.03834	61.1813	0.331059	177.554	176.554	0.289121	144.717	143.717	0.289581	2.24688	2.15751	3.34121
LR-01_Td-H2Ngch - 6	core/inner part of 7		ok	16.67		<3.1018	317.369	9.74665	793.446	40.921	777.812	812.549	0.407807		470284	2082.04	3.02807	<0.10971	<0.033704	10.035	0.283579	4.58406	8.79343	2.15284	48.1054	15.5964	194.996	70.4793	332.139	69.1342	607.791	112.137	7768.21	0.900964	206.159	342.073	0.602677	3.11694	60.5396	0.320006	48.0371	47.0371	0.278757	61.2553	60.2553	0.334512	1.67244	1.77999	3.08144
LR-01_Td-H2Ngch - 10	core/inner part		ok	16.43		<3.1448	295.529	12.3567	818.442	42.6493	802.072	838.458	0.302329		474871	1110.62	2.16321	<0.087898	<0.032796	5.52217	0.0712508	1.38161	3.34199	0.864294	19.6979	6.86801	93.3095	37.6369	186.435	40.2194	370.194	69.1055	7393.88	0.669815	74.5509	172.039	0.433336	3.96738	64.2249	0.325666	132.816	131.816	0.277629	99.4674	98.4674	0.273233	2.11997	1.99329	3.38284
LR-01_Td-H2Ngch - 11	rim		ok	16.14		<3.1216	289.292	10.9651	805.71	41.7641	789.717	825.259	0.250054		478489	952.439	2.026	<0.11987	<0.035678	6.50659	0.0855171	1.50993	3.47074	0.802092	19.3142	6.70046	85.5779	33.2817	158.545	32.9296	287.411	53.6832	7945.14	0.616371	126.632	211.233	0.59949	3.35847	60.2241	0.299501	112.269	111.269	0.261288	101.615	100.615	0.28109	2.04637	2.00266	3.39271
LR-01_Td-H2Ngch - 13	rim		ok,endAlincl	16.8		<3.3637	281.985	7.6885	769.578	39.307	754.631	787.828	0.352949		475343	1320.89	3.3729	0.091391	<0.03997	8.27272	0.068924	1.41293	3.5857	0.800532	23.7897	8.42484	113.016	45.0612	219.098	47.1107	427.939	78.4144	8315.42	0.894859	127.627	259.61	0.491609	3.78655	57.1641	0.264985	197.938	196.938	0.22871	51.4941	50.4941	0.156523	2.29433	1.70324	3.57595
LR-01_Td-H2Ngch - 14	core/inner part		ok	16.86		<3.1094	223.228	5.44397	736.688	37.1411	722.663	753.796	0.278705		464451	1630.35	1.36099	<0.091733	<0.033497	7.03924	0.194148	3.94746	8.18682	1.62268	44.9857	14.0758	165.009	58.4568	263.405	51.7358	453.401	79.449	8793.39	0.513824	141.64	232.979	0.607951	2.74774	52.8182	0.258501	31.0762	30.0762	0.240883	67.2841	66.2841	0.37013	1.47822	1.82141	3.07918
LR-01_Td-H2Ngch - 16	rim		ok	16.61		<3.1525	251.042	8.7734	782.727	40.1917	767.403	801.444	0.271143		470719	1116.78	1.85553	<0.098607	<0.033492	6.42101	0.0973506	1.89655	4.49434	0.982314	24.9504	8.39345	104.865	39.4686	185.312	39.0921	348.808	64.1252	8194.8	0.573995	82.0162	165.46	0.495686	3.32625	57.4412	0.283597	81.7117	80.7117	0.255798	49.0785	48.0785	0.235235	1.90694	1.68195	3.23035
LR-01_Td-H2Ngch - 17	core/inner part		ok	16.86		<3.0736	341.486	12.657	821.037	42.831	804.59	841.15	0.289181		478734	1649.73	3.67628	<0.091027	<0.034327	9.59428	0.0984194	1.72329	4.32569	1.16746	26.4818	9.66186	133.564	54.0119	273.635	59.131	528.223	98.751	7411.75	1.09279	150.431	311.238	0.483331	3.95484	64.5912	0.333474	201.26	200.26	0.279722	254.958	253.958	0.342456	2.3016	2.40476	3.50001
LR-01_Td-H2Ngch - 20	core/inner part		ok	16.69		<3.1667	324.115	10.1631	797.771	41.2172	782.01	817.03	0.538915		473469	2635.95	1.89663	<0.12987	<0.033552	11.9857	0.430755	7.15466	13.3931	3.15161	76.2672	23.2433	270.313	93.9235	406.791	78.7884	672.662	113.082	8023.54	0.677234	242.243	293.687	0.824833	2.48845	59.01	0.301472	26.0594	25.0594	0.279225	131.66	130.66	0.60839	1.39897	2.11614	2.83365
LR-01_Td-H2Ngch - 26	rim		ok, smallinhom.inU,Y	17		<3.1957	154.135	8.4908	779.435	39.9692	764.206	798.034	0.228455		470677	936.462	1.10691	<0.1006	<0.03561	4.88387	0.108996	1.92857	4.67815	1.02252	24.8634	7.65139	94.2498	33.2981	149.582	29.8539	270.327	47.6412	8285.99	0.319867	60.6348	102.485	0.591645	2.8682	56.804	0.289855	46.2342	45.2342	0.279874	59.5506	58.5506	0.351465	1.65547	1.76753	2.97325
LR-01_Td-H2Ngch - 30	rim		ok	17.36		<3.1021	315.841	9.90289	795.086	41.0331	779.404	814.248	0.545295		473445	2191.18	3.99162	<0.1191	<0.033305	12.4794	0.220321	3.71344	8.26582	1.72115	47.0862	16.0073	200.475	74.7506	345.99	71.2594	613.542	114.204	7847.78	0.995105	248.789	378.765	0.656843	3.06044	60.3286	0.266719	78.1201	77.1201	0.236581	75.2078	74.2078	0.26314	1.88717	1.87045	3.23531
LR-01_Td-H2Ngch - 33	rim		ok	17.11		<3.0952	250.313	9.76606	793.651	40.935	778.011	812.761	0.232857		469654	845.843	1.95149	<0.10889	<0.032593	5.83622	0.0618993	0.972936	2.67477	0.640671	15.9355	5.49404	72.2204	28.5954	142.974	31.7661	290.821	58.2699	7823.45	0.638256	60.8713	160.788	0.378581	4.02685	60.0315	0.300008	199.288	198.288	0.268538	73.7831	72.7831	0.196972	2.2973	1.86203	3.41457
LR-01_Td-H2Ngch - 41	core/inner part		ok	16.26		<3.0442	270.546	10.4057	800.224	41.3858	784.392	819.572	0.173352		471039	782.45	1.54659	<0.10472	<0.03595	6.44163	0.0736851	1.22723	2.98531	0.673949	16.5256	5.61881	69.7157	26.9025	132.1	27.741	252.781	47.126	8052.89	0.580712	88.9113	181.437	0.490038	3.62588	58.4931	0.293344	138.117	137.117	0.263101	117.142	116.142	0.27129	2.13709	2.06499	3.39135
LR-01_Td-H2Ngch - 42	rim		ok	16.2		<3.1445	302.544	12.1572	816.689	42.5268	800.371	836.641	0.251912		477821	1419.25	2.89355	<0.14776	<0.034339	8.94719	0.103434	2.09733	4.40988	1.14326	26.4194	9.02518	120.914	48.5837	237.6	51.1551	463.294	88.3972	7641.38	0.790039	120.931	234.151	0.516466	3.8316	62.5308	0.323814	135.957	134.957	0.269398	93.7799	92.7799	0.252693	2.13019	1.96745	3.35483
LR-01_Td-Figch - 4	core/inner part		ok	16.49		<3.0218	309.03	12.2201	817.244	42.5656	800.91	837.217	0.336809		470520	1764.32	2.24696	<0.10773	<0.035908	8.02168	0.243507	4.11013	8.48158	2.18906	44.4634	14.1743	171.54	62.647	283.771	57.5047	494.028	89.2879	7245.35	0.679566	145.052	219.231	0.66164	2.87997	64.941	0.344621	36.9896	35.9896	0.313332	82.7997	81.7997	0.478054	1.55618	1.91275	2.95439
LR-01_Td-Figch - 5	core/inner part		ok,inhominUThY	16.56		<3.0368	203.243	8.83851	783.474	40.2423	768.128	802.217	0.243021		470426	1192.94	1.02725	<0.12372	<0.036477	4.97338	0.165718	2.86769	6.03633	1.3521	29.941	9.74755	115.629	42.5822	192.941	39.3044	348.389	61.7633	8183.35	0.293757	89.8703	134.722	0.667079	3.01299	57.4857	0.307478	32.6555	31.6555	0.280043	19.3994	18.3994	0.256973	1.50045	1.2648	2.91007
LR-01_Td-Figch - 6	core/inner part of 7		ok	16.87		<3.0638	306.78	11.8663	814.094	42.3458	797.853	833.95	0.25705		475080	1235.49	2.57462	0.0974931	<0.038531	7.45157	0.0839992	1.47539	3.38639	0.903025	20.8143	7.56579	103.582	41.5657	206.365	45.3048	404.89	76.9508	7708.48	0.76234	98.8908	202.593	0.488126	3.9089	61.6309	0.328832	179.324	178.324	0.270937	236.419	235.419	0.330776	2.25121	2.37184	3.38235
LR-01_Td-Figch - 7	rim		ok	16.69		<2.969	434.829	11.4276	810.079	42.0667	793.957	829.787	0.558131		476657	2421.5	5.76906	<0.080423	0.0606461	19.5788	0.157654	2.93969	6.71773	1.54032	45.3068	16.2201	216.657	82.4785	394.481	80.1118	691.121	123.341	8018.58	1.37092	389.546	500.714	0.777981	3.18994	59.4441	0.269925	195.113	194.113	0.229295	338.673	337.673	0.334508	2.28805	2.5285	3.50189
LR-01_Td-Figch - 12	rim		ok	15.83		<2.9746	300.544	7.72479	770.041	39.338	755.081	788.308	0.316353		476957	1234.1	3.54238	<0.123	<0.035419	11.1301	0.0984467	1.8202	4.10476	0.75676	26.3334	8.96155	112.545	43.5743	205.754	43.0091	378.067	69.8121	8641.72	1.0671	319.276	416.764	0.766084	3.35925	55.1923	0.222528	165.753	164.753	0.194944	82.8537	81.8537	0.170187	2.21683	1.91304	3.62669
LR-01_Td-Figch - 15	core/inner part		ok,inhominU,Th,REE,,endAlincl	16.75		<3.1257	326.355	8.96717	784.935	40.3414	769.548	803.732	0.47368		468805	2497.58	2.23379	<0.15719	<0.039317	10.8108	0.378084	6.22854	12.9221	2.70515	70.0187	21.4488	250.613	87.5347	382.63	76.1211	646.119	114.355	8122.92	0.66191	259.847	313.067	0.830006	2.57815	57.7139	0.274942	27.9025	26.9025	0.260403	41.7909	40.7909	0.349347	1.42979	1.61056	2.91805
LR-01_Td-Figch - 16	rim		ok	16.79		<2.9796	248.419	8.57146	780.383	40.0333	765.127	799.017	0.212022		463150	908.383	2.20971	<0.12768	<0.039071	6.23189	0.0479841	1.07141	2.76172	0.627031	17.2939	5.88532	79.5884	30.2037	155.654	33.3872	307.514	58.666	8122.28	0.647148	70.3941	166.666	0.422366	3.86381	57.0221	0.27738	190.828	189.828	0.244573	80.4858	79.4858	0.193525	2.27836	1.90029	3.54075
LR-01_Td-Figch - 20	rim		ok	16.95		<2.9444	337.266	5.57791	738.936	37.287	724.848	756.12	0.233842		460329	1275.8	4.36045	0.0852613	<0.036677	12.1455	0.0893046	1.63144	4.11904	0.556952	25.2141	8.65829	112.699	44.2705	214.778	45.9317	402.018	75.814	8617.94	1.60607	162.318	360.589	0.450146	3.56718	53.4151	0.167079	219.26	218.26	0.148022	52.4515	51.4515	0.0968432	2.33897	1.7114	3.60614
LR-01_Td-Figch - 22	rim of 21		ok,1stpartY,REEricher	16.86		<3.0701	298.282	6.63797	755.322	38.3599	740.778	773.072	0.479306		462302	2001.92	1.91285	<0.16017	<0.041201	10.0245	0.261503	5.13949	10.2206	1.8331	53.0043	16.7757	200.297	71.6439	316.4	62.975	539.174	95.0861	8420.54	0.653833	228.787	315.497	0.725164	2.69187	54.9017	0.240778	33.4661	32.4661	0.220102	67.037	66.037	0.326672	1.51143	1.81979	3.08152
LR-01_Td-Figch - 28	core/inner part		ok	16.5		<2.982	236.245	11.2961	808.851	41.9815	792.766	828.515	0.316049		468127	1727.39	1.33116	<0.13558	0.0370144	5.22557	0.292805	4.60512	8.55506	2.57744	49.1694	14.983	175.851	62.4342	276.425	55.3311	467.291	86.2799	7403.48	0.414955	124.283	180.643	0.688002	2.65731	63.2307	0.384196	19.8001	18.8001	0.350746	17.9649	16.9649	0.379365	1.27416	1.22955	2.79024
LR-01_Td-Figch - 29	core/inner part		ok	17.02		<2.9894	196.89	9.82478	794.269	40.9772	778.611	813.401	0.305984		471547	1242.33	1.126	<0.097	<0.041008	5.2049	0.162999	3.22187	6.71941	1.63225	34.0727	10.6242	126.378	44.3059	197.569	40.3366	346.004	61.6974	7823.34	0.323823	83.6436	124.603	0.671278	2.73785	60.2744	0.329792	27.3484	26.3484	0.308045	89.4695	88.4695	0.543994	1.42075	1.94679	2.88335
LR-01_Td-Figch - 30	rim		ok,inhominLa	16.88		<2.9368	290.265	12.2105	817.16	42.5597	800.828	837.129	0.324322		468211	1667.36	1.23187	0.168331	0.446068	6.77093	0.578495	6.44835	9.68812	2.21107	48.4336	14.5468	172.197	58.802	259.623	49.8613	427.667	74.6679	7732.57	0.367644	119.306	148.585	0.802944	2.48359	60.5505	0.312057	15.4635	14.4635	0.2736	14.546	13.546	0.298033	1.16027	1.13181	2.40968
LR-01_Td-Figch - 32	rim		ok	16.85		<2.9494	238.111	12.2258	817.295	42.5691	800.959	837.269	0.227839		467743	1098.57	1.23534	<0.12922	<0.039115	3.96274	0.154275	2.76601	5.50691	1.4815	30.3168	9.53796	109.336	39.316	180.753	37.0339	320.553	57.75	7306.75	0.33657	72.0908	113.485	0.635246	2.93183	64.0151	0.350534	26.4688	25.4688	0.321722	43.9185	42.9185	0.435779	1.40601	1.63264	2.86664
LR-01_Td-Figch - 33	core/inner part of 32		ok	16.54		<3.0243	318.725	13.4363	827.548	43.2886	810.905	847.903	0.311207		476700	1348.56	2.09938	0.149496	0.330843	5.98224	0.366202	3.92063	5.70788	1.55886	29.8686	9.54006	121.012	46.3271	216.277	45.1271	399.129	75.4592	7277.81	0.539482	86.7998	166.185	0.522309	3.29825	65.5005	0.364994	35.0616	34.0616	0.292497	79.0438	78.0438	0.414981	1.53227	1.89234	2.65687
Td-Sgch- - 1	rim			17.14		<4.3301	260.092	13.1734	825.386	43.1364	808.809	845.66	0.280653		457817	877.423	1.95833	<0.16081	0.044473	5.94671	0.050699	1.18561	2.63368	0.667921	16.1735	5.63493	74.3143	29.3704	145.485	31.4164	283.243	58.8093	7944.15	0.650789	67.9948	150.11	0.452965	3.81142	57.6294	0.31287	166.355	165.355	0.263424	57.888	56.888	0.184957	2.21842	1.75502	3.47141
Td-Sgch- - 5	core/inner part of 6		heterogeneous	16.29		<4.2706	330.939	8.15715	775.431	39.6995	760.317	793.889	0.745757		460359	3034.39	2.88877	<0.14225	0.0446867	15.6138	0.500681	8.67238	17.6593	3.3485	88.6171	26.7024	306.014	106.715	466.165	89.3827	746.34	138.323	8104.39	0.832033	356.442	430.247	0.828458	2.43891	56.8037	0.258779	26.0653	25.0653	0.248093	127.869	126.869	0.510338	1.39907	2.10336	2.93416
Td-Sgch- - 6	rim			16.29		<4.2713	345.249	6.36677	751.346	38.098	736.913	768.957	0.305359		459582	1290.01	4.01	<0.15948	<0.035434	12.6921	0.0974937	1.83276	4.17906	0.695962	25.1759	8.66267	114.795	44.2644	214.841	44.167	394.064	75.6933	9202.82	1.12822	198.244	357.104	0.555145	3.43276	49.9393	0.207433	199.432	198.432	0.178692	146.892	145.892	0.175876	2.29761	2.16403	3.56382
Td-Sgch- - 13	rim			16.44		<4.3074	246.864	9.04161	785.773	40.3983	770.362	804.6	0.194493		451174	737.583	1.66738	<0.13015	<0.032895	5.58329	0.0649418	0.910271	2.366	0.496725	14.2767	4.86446	64.5297	24.6676	123.601	25.6491	239.775	49.143	8736.83	0.523359	72.2689	162.996	0.443378	3.71574	51.6405	0.261288	190.861	189.861	0.233069	162.738	161.738	0.232864	2.27843	2.20881	3.39965
Td-Sgch- - 15	rim			16.55		<4.2996	324.188	12.8117	822.354	42.9233	805.867	842.516	0.493503		455117	2020.71	3.68102	<0.15463	<0.036	10.9393	0.200922	3.4416	6.98933	1.7426	42.7467	14.3715	183.473	70.3034	328.1	65.4326	571.02	109.938	7552.49	0.910852	215.215	328.718	0.654711	3.11229	60.2604	0.308213	80.1135	79.1135	0.264445	118.027	117.027	0.340025	1.89825	2.06829	3.2138
Td-Sgch- - 16	core/inner part		Heterogeneous	16.97		<4.8407	209.99	8.15678	775.427	39.6992	760.313	793.884	0.161953		469267	984.318	1.84094	<0.19788	0.0734264	5.24311	0.0880461	1.40036	3.37158	0.887677	20.5531	6.85495	89.2572	34.205	165.509	34.3894	305.468	59.9834	8140.74	0.460363	78.5655	161.388	0.48681	3.42234	57.6443	0.326004	104.32	103.32	0.290175	70.9955	69.9955	0.275091	2.01418	1.84507	3.26316
Td-Sgch- - 19	core/inner part			16.12		<4.177	384.027	4.15669	712.395	35.5844	699.031	728.682	0.400875		447663	1996.74	8.97635	<0.17079	<0.036028	28.1426	0.14454	2.66852	7.07809	1.10707	46.1439	15.3766	192.875	70.7012	327.201	65.0763	561.337	102.635	9470.57	2.7823	945.825	1168.43	0.809486	2.91037	47.2689	0.187276	246.313	245.313	0.175947	123.948	122.948	0.160644	2.38972	2.08972	3.90761
Td-Sgch- - 22	core/inner part of 22			16.66		<4.2867	316.48	6.52158	753.632	38.2485	739.136	771.323	0.311775		450962	1175.55	4.9738	<0.13024	<0.033137	7.78524	0.0534671	1.02255	2.95941	0.541602	19.718	7.40503	102.245	40.2679	199.991	41.9516	383.502	73.5456	9422.26	1.53119	154.687	394.675	0.391935	3.7508	47.8613	0.216755	280.704	279.704	0.188151	40.7522	39.7522	0.103213	2.4467	1.59936	3.86815
Td-Fi_CA - 1	core/inner part			17.098	0.478407	<5.4678	387.415							0.398153		1272.87	3.6441	0.115233	<0.048791	16.8285	0.118244	2.3914	5.66662	1.00265	30.9753	9.94029	124.231	44.8019	207.18	42.3421	370.862	64.0581	8539.56	1.38368	384.399	481.295	0.798676	2.98527	0	0.231367	143.172	142.172	0.215533	64.4733	63.4733	0.185023	2.15281	1.80259	3.60963
Td-Fi_CA - 3	rim			16.67	0.361856	<5.2906	384.74							0.554213		1493.69	5.64049	0.0776868	<0.029338	16.0024	0.124254	1.94146	5.17537	0.966323	35.2357	11.3936	143.46	53.0502	239.841	49.5712	444.493	74.7239	8192.05	1.78323	793.963	863.696	0.919262	3.09837	0	0.218768	195.801	194.801	0.207374	439.503	438.503	0.341339	2.28959	2.64197	3.84205
Td-Fi_CA - 5	core/inner part			17.326	0.595409	<6.056	378.999							0.888552		2400.97	2.02392	<0.089234	0.100992	9.67548	0.474239	7.99541	14.8591	3.60029	76.3538	22.8143	261.441	88.1108	380.542	74.5689	646.521	106.33	7347.84	0.584748	228.331	287.302	0.794742	2.47291	0	0.326776	16.8341	15.8341	0.308226	26.7853	25.7853	0.428751	1.19959	1.41137	2.78234
Td-Fi_CA - 6	rim			16.242	0.439454	<5.2018	414.216							0.871798		3872.24	4.33803	0.146749	0.0536635	22.0755	0.651438	11.5021	21.9923	3.25209	115.314	34.8896	408.814	139.175	612.677	120.254	1039.38	171.571	8690.89	1.21988	631.742	767.197	0.823442	2.54244	0	0.197429	28.7622	27.7622	0.18468	73.5747	72.5747	0.308547	1.44345	1.86078	3.07103
Td-Fi_CA - 10	core/inner part			16.562	0.349005	<5.2039	441.73							0.514779		3411.48	5.32738	<0.10617	<0.048659	24.1173	0.48593	9.45048	18.6739	2.43515	97.1373	30.2026	359.298	124.319	547.83	110.186	929.18	154.592	9239.36	1.53801	683.754	925.007	0.739187	2.5861	0	0.174799	40.5839	39.5839	0.161893	100.991	99.9908	0.268734	1.59752	1.99996	3.27957
Td-Fi_CA - 12	rim			17.754	0.615254	<5.2989	238.676							0.324571		901.222	1.7059	<0.09389	<0.037074	5.84088	0.0519747	1.19619	2.97344	0.774134	19.4	6.42069	82.3753	30.9798	152.221	32.5907	296.432	53.706	8031.94	0.52271	68.5391	145.207	0.472009	3.59856	0	0.311608	139.44	138.44	0.281172	100.634	99.6342	0.281489	2.14126	1.99841	3.4462
Td-Fi_CA - 13	core/inner part of 14			16.323	0.381729	<5.2877	310.541							0.628114		2414.75	2.39011	0.160453	0.0616384	12.56	0.377514	7.49965	14.0777	2.4513	72.0189	22.2215	258.316	88.722	394.484	77.7127	667.813	113.134	8321.78	0.68867	340.384	430.722	0.790263	2.58525	0	0.235359	25.6841	24.6841	0.217311	30.3897	29.3897	0.266927	1.39242	1.4682	3.05726
Td-Fi_CA - 14	rim		shorter avoid melt	16.609	0.497525	<5.9845	445.958							0.521869		2343.66	7.20309	0.103299	<0.040486	25.2808	0.285627	4.1792	8.75799	1.69259	55.8307	19.1082	237.494	85.9253	390.226	77.6738	686.329	117.46	8671.77	1.79991	769.086	763.535	1.00727	2.88988	0	0.234011	136.172	135.172	0.205459	206.673	205.673	0.285375	2.13089	2.31318	3.42703
Td-Fi_CA - 16	core/inner part			17.091	0.43998	<6.0513	374.231							0.477517		1628.92	2.64506	0.0983553	<0.042328	10.7984	0.238561	3.39811	7.23779	1.15356	41.8826	13.3452	163.747	58.744	269.536	56.0185	490.333	83.7536	9068	0.874721	224.521	408.212	0.55001	2.99446	0	0.202555	65.0176	64.0176	0.18455	109.844	108.844	0.260697	1.8063	2.0368	3.23329
Td-Fi_CA - 17	core/inner part			16.464	0.517829	<5.2922	437.267							0.361025		1363.22	2.02782	<0.10317	<0.046844	8.19754	0.105242	2.13481	4.72302	0.882973	30.3605	10.127	126.967	47.5123	225.325	47.0098	422.472	75.0734	8762.95	0.729066	148.652	286.807	0.5183	3.32742	0	0.225427	99.0303	98.0303	0.199239	74.5459	73.5459	0.204728	1.99136	1.86656	3.4354
Td-Fi_CA - 18	core/inner part of 19		shorter avoid high La (apatite?)	17.845	0.491032	<5.6903	424.533							0.757072		2824.24	2.72648	<0.10236	0.086847	17.1976	0.478647	8.87825	15.8542	2.63001	83.4346	25.5004	303.437	105.453	460.849	93.4817	800.544	131.486	9023.16	0.977798	396.972	557.625	0.711898	2.63825	0	0.221073	30.8846	29.8846	0.200224	53.6371	52.6371	0.287123	1.47545	1.72129	3.06633
Td-Fi_CA - 19	rim			17.815	0.38837	<10.487	590.708							<0.32919		1859.61	3.67628	<0.16421	<0.091697	14.7298	0.172704	2.72938	6.95196	1.05002	38.8666	13.6857	173.603	63.6689	299.229	59.7712	516.759	102.296	9247.29	1.05279	307.01	486.855	0.630598	2.97668	0	0.195289	128.834	127.834	0.17726	67.549	66.549	0.155031	2.10665	1.82314	3.4501
Td-Fi_CA - 20	rim			17.541	0.34928	<5.4151	350.428							0.351439		1385.05	4.66538	0.124657	<0.037879	14.6845	0.121362	1.91583	4.31136	0.788397	30.2278	10.4387	131.036	49.1913	229.581	46.9724	423.223	74.2253	8657.33	1.55361	298.497	478.397	0.623953	3.22983	0	0.211134	207.018	206.018	0.184883	263.991	262.991	0.238232	2.31391	2.41994	3.59571
Td-Fi_CA - 23	rim of 22	few common-Pb		16.151	0.459565	<7.3491	262.879							0.355026		2140.45	2.43101	<0.11857	0.0841053	11.27	0.188204	3.83904	9.8627	1.4351	50.8612	16.4755	204.589	74.6889	341.19	67.7724	576	107.548	10155	0.859513	266.008	460.514	0.577634	2.8154	0	0.195891	56.9288	55.9288	0.186828	97.1995	96.1995	0.260823	1.74764	1.98317	3.38861
Td-Fi_CA - 24	core/inner part			16.591	0.342612	<5.1712	432.539							0.617017		2922.08	6.63729	<0.08826	<0.045533	24.2374	0.340775	6.23189	12.8311	2.06234	73.0841	23.7994	292.305	105.091	477.848	96.077	824.154	141.987	8809.12	1.73217	622.529	807.425	0.771005	2.8195	0	0.205892	76.8343	75.8343	0.184934	442.579	441.579	0.418825	1.87987	2.64501	3.37463
Td-Fi_CA - 27	core/inner part	high common-Pb		17.619	0.647204	<8.3278	276.006							0.778866		2274.83	1.53227	<0.12981	0.0733647	10.4836	0.390531	6.67071	13.1766	2.328	64.857	19.3897	229.047	79.7283	356.863	68.3372	580.396	105.795	8929.6	0.528531	244.907	320.533	0.764062	2.53396	0	0.24346	23.676	22.676	0.229663	94.6052	93.6052	0.434835	1.35557	1.9713	2.91422
Td-Hk1_CA - 7	rim			17.199	0.479076	<5.8369	372.538							0.341896		1322.94	2.4086	<0.088473	<0.068479	7.63293	0.0894869	1.75968	3.31704	0.928125	21.8213	7.91769	106.135	43.9494	222.828	46.9751	427.439	84.4308	8338.71	0.636389	96.2158	192.106	0.500848	4.0273	0	0.333514	163.941	162.941	0.25972	49.8361	48.8361	0.176478	2.21203	1.68874	3.33178
Td-Hk1_CA - 8	rim	high common-Pb		16.089	0.712529	<5.7441	287.351							0.287011		1213.16	1.60291	0.0839597	0.0525506	5.98081	0.139451	2.12411	4.41672	1.02856	26.6167	8.39448	109.352	41.8712	200.179	40.2936	363.371	71.3923	8540.81	0.576983	87.2103	144.897	0.601876	3.32295	0	0.290019	72.2773	71.2773	0.254339	39.5643	38.5643	0.218153	1.85295	1.58619	3.01664
Td-Hk1_CA - 9	rim			17.194	0.906838	<5.682	281.599							0.305987		829.732	1.49202	<0.073359	<0.046096	4.84204	0.0469106	0.960076	2.56848	0.576394	16.8598	5.22434	69.8772	27.595	138.005	29.5877	273.265	56.158	8682.36	0.524947	46.543	108.596	0.428589	3.91065	0	0.267781	161.575	160.575	0.246788	65.4254	64.4254	0.185946	2.20568	1.80906	3.36454
Td-Hk1_CA - 10	core/inner part of 9			16.87	0.906868	<5.5861	287.668							0.348106		860.648	1.51781	<0.086892	0.0472216	4.96864	0.0843885	1.11282	2.80833	0.62771	16.6433	5.66958	73.0093	28.5137	146.478	31.0591	292.088	60.4307	8528.71	0.574386	48.4016	112.84	0.428939	4.00069	0	0.280697	143.753	142.753	0.248391	148.486	147.486	0.261228	2.15458	2.16875	3.12618
Td-Hk1_CA - 11	rim			16.715	0.537366	<5.7229	266.16							0.532705		1859.83	1.25981	<0.10394	<0.041255	6.92655	0.332285	5.16736	8.73771	1.9922	50.4643	15.7765	186.999	66.3045	292.66	56.2611	477.324	88.262	8758.84	0.443416	149.728	171.982	0.870602	2.55254	0	0.290045	23.368	22.368	0.255485	98.5453	97.5453	0.494748	1.34963	1.98921	2.71397
Td-Hk1_CA - 12	rim			16.737	0.777214	<5.5183	176.713							0.312688		1400.65	0.978848	<0.084973	<0.050101	5.68406	0.243463	4.26209	7.72848	1.64699	38.3321	11.8998	143.52	50.1336	223.192	43.1774	361.717	67.2477	8680.33	0.287181	100.731	120.073	0.838917	2.52033	0	0.29254	21.4006	20.4006	0.263807	30.9162	29.9162	0.336677	1.30964	1.47591	2.69301
Td-Hk1_CA - 15	core/inner part			16.9	0.582548	<5.6638	334.9							0.335495		1545.01	2.17326	<0.10414	<0.045772	7.91514	0.146695	2.33059	4.4997	1.12846	28.6096	10.1767	132.457	53.4576	255.89	52.303	466.249	89.8757	8400.06	0.596089	118.694	199.039	0.596338	3.52	0	0.304063	105.102	104.102	0.24612	55.9916	54.9916	0.212748	2.01746	1.7403	3.13252
Td-Hk1_CA - 17	rim of 18	few common-Pb		16.294	0.777772	<5.4399	208.047							0.265865		661.606	0.972881	<0.07159	0.0453283	4.44959	0.0471955	0.766397	2.54151	0.452785	14.5208	4.78531	60.3417	22.947	107.064	21.793	196.611	38.3451	9330.28	0.33926	42.3598	80.1571	0.528459	3.25829	0	0.227864	141.005	140.005	0.226627	45.7448	44.7448	0.166988	2.14614	1.65074	3.23004
Td-Hk1_CA - 18	rim			17.72	0.777636	<5.5471	211.323							0.255074		722.736	0.881097	<0.08577	<0.045765	3.77951	0.0553533	1.07176	2.60189	0.513102	15.2829	5.11103	66.9078	24.5584	116.48	23.2067	208.196	39.6982	9327.78	0.282746	43.8326	73.7882	0.594033	3.11169	0	0.24876	87.1765	86.1765	0.224619	23.6188	22.6188	0.153411	1.93539	1.35447	3.12484
Td-Hk1_CA - 19	core/inner part			16.606	0.971388	<5.8082	245.641							0.348891		1258.58	0.934732	<0.080705	<0.025943	2.80586	0.186891	3.41899	6.79057	1.39193	34.6177	10.7335	125.713	44.3358	198.199	38.2015	328.689	61.9141	8727.38	0.282514	70.9777	122.599	0.578941	2.6146	0	0.277548	13.3988	12.3988	0.257922	14.8882	13.8882	0.296746	1.09338	1.14264	2.8169
Td-Hk1_CA - 22	rim	few common-Pb		17.448	0.712339	<7.6561	250.833							0.398205		1654.18	1.07478	<0.10435	<0.099173	6.38919	0.255853	4.22981	7.64379	1.741	40.8037	12.9475	159.742	58.2645	268.221	51.3804	444.162	84.6996	8887.49	0.36019	132.951	156.418	0.849968	2.78049	0	0.301383	29.1057	28.1057	0.263453	27.9732	26.9732	0.284038	1.44879	1.43093	2.7863
Td-Hk1_CA - 27	core/inner part of 26			17.257	0.628075	<5.6841	196.732							0.408987		1379.17	1.17151	<0.077854	0.0498344	4.98432	0.21877	3.46785	6.9346	1.77141	38.1428	11.7657	141.413	48.915	217.072	42.0045	357.939	66.8785	8092.81	0.335074	94.1628	136.136	0.691684	2.53116	0	0.332986	24.1946	23.1946	0.309134	19.4478	18.4478	0.32045	1.36539	1.26594	2.79398
Td-Hk1_CA - 30	rim	few common-Pb		16.632	0.56978	<5.7116	270.955							0.320197		1844.73	1.27338	<0.089496	0.0583767	6.44644	0.351923	4.4113	8.82056	1.98619	49.5583	15.5211	187.69	66.7465	301.184	57.1691	490.128	89.2647	8450.32	0.403506	151.397	173.532	0.872448	2.61137	0	0.290429	25.9831	24.9831	0.265768	24.8057	23.8057	0.298689	1.39765	1.37668	2.69293
Td-Hk1_CA - 31	core/inner part			16.974	0.530669	<5.6177	318.374							0.477864		1675.19	1.36641	<0.10141	0.0812411	4.62009	0.211313	4.32948	8.36433	1.2575	44.8301	14.2041	170.314	59.7746	268.604	51.5668	444.142	81.95	8944.02	0.429295	140.227	228.941	0.612502	2.60778	0	0.198532	18.5005	17.5005	0.180187	60.191	59.191	0.316324	1.24305	1.77226	3.0348
Td-Hk1_CA - 32	core/inner part	high common-Pb		16.713	0.550453	<5.5903	296.945							0.436329		1561.41	1.32907	<0.078174	<0.051204	6.26564	0.275235	4.4194	8.72057	1.62583	42.283	13.1674	156.618	55.1046	249.278	48.3519	421.027	78.3103	8615.91	0.42075	115.878	146.488	0.791041	2.68824	0	0.258847	23.3616	22.3616	0.238618	40.9324	39.9324	0.324022	1.3495	1.60133	2.7261
Td-Hk1_CA - 37	core/inner part			16.851	0.511477	<5.6704	254.313							0.494828		1657.5	1.28617	<0.11366	0.0875629	6.42962	0.336624	5.60529	9.72331	3.00729	50.3867	14.9025	172.836	60.2001	263.596	51.3629	438.159	81.0573	7786.27	0.428615	116.26	159.926	0.72696	2.53512	0	0.415369	17.3662	16.3662	0.38145	21.2137	20.2137	0.453053	1.21395	1.30565	2.67677
Td-H2N_CA - 1	core/inner part			16.773	0.472479	<5.7533	310.102							0.591325		2159.25	1.55916	0.0984354	0.0383861	7.99714	0.34402	5.7728	11.4271	2.95342	62.4427	18.9005	221.321	79.0431	342.274	66.1188	566.749	104.114	8639.67	0.500341	176.258	235.705	0.747789	2.56075	0	0.338019	22.3961	21.3961	0.316686	48.357	47.357	0.478872	1.33033	1.67538	2.83578
Td-H2N_CA - 4	rim			17.458	0.563349	<6.6126	318.332							0.350674		984.142	2.14635	<0.1088	<0.095573	5.64311	0.0665488	0.910544	2.88926	0.688503	18.6797	6.39434	85.0478	33.3925	163.505	33.7442	298.66	58.3615	7919.14	0.657103	83.533	172.253	0.484944	3.51168	0	0.286517	190.938	189.938	0.268805	42.2125	41.2125	0.173399	2.27861	1.61503	3.41303
Td-H2N_CA - 5	core/inner part			16.92	0.634586	<5.6579	306.775							0.520027		1353.53	1.34352	<0.091849	0.0367683	6.16724	0.147331	3.01775	5.8574	1.4086	34.0098	10.8787	132.516	48.3643	219.006	43.6259	381.831	70.2836	8543.85	0.43715	91.5047	145.635	0.628315	2.88139	0	0.305111	41.5586	40.5586	0.271219	91.409	90.409	0.409326	1.60808	1.95621	2.99497
Td-H2N_CA - 10	core/inner part			16.729	0.712127	<5.7213	309.771							0.503471		1886.41	1.36901	<0.13904	<0.04758	6.45811	0.308085	5.94937	11.3967	2.76802	57.1853	17.2684	197.833	68.0983	299.836	57.6266	488.244	88.9284	8076.06	0.366342	135.7	171.307	0.792144	2.46796	0	0.331483	15.7423	14.7423	0.312586	21.5054	20.5054	0.395035	1.16856	1.31187	2.7451
Td-H2N_CA - 13	rim	few common-Pb		15.961	0.647839	<5.6527	177.494							0.50979		1092.08	1.28848	<0.07486	<0.056597	5.66905	0.16026	2.65058	5.05085	1.27973	27.2369	8.54329	103.678	38.2087	178.423	36.0854	326.349	60.235	8396.71	0.407907	80.9147	132.778	0.609398	3.1477	0	0.333565	44.1634	43.1634	0.296005	46.1821	45.1821	0.326391	1.63512	1.65497	2.9183
Td-H2N_CA - 16	rim			16.976	0.530325	<5.7166	285.155							0.451058		2467.72	2.16014	<0.086333	<0.062361	10.8602	0.382193	6.63097	13.1137	2.50176	68.859	21.1132	253.633	87.985	392.892	76.9441	656.151	118.049	9103.03	0.722096	251.619	356.509	0.705785	2.58701	0	0.254523	26.8885	25.8885	0.236062	78.8802	77.8802	0.402098	1.41311	1.89143	2.96979
Td-H2N_CA - 21	rim		shorter avoid melt	17.391	0.537395	<7.6	383.678							0.62539		1315.21	2.12622	<0.14339	0.0496639	7.37105	0.0701653	1.60148	4.05483	0.949953	23.8668	8.02962	110.685	43.3852	215.551	44.8273	396.338	77.0992	7682.38	0.717078	103.594	192.416	0.538385	3.58077	0	0.295218	140.151	139.151	0.259637	34.8472	33.8472	0.169153	2.14349	1.52952	3.43812
Td-H2N_CA - 22	core/inner part of 21			17.024	0.589062	<5.8424	355.683							0.575513		1937.67	1.36548	<0.085559	<0.061887	7.24685	0.309108	5.08265	9.97657	2.17298	55.3317	17.0788	196.654	68.9826	306.22	58.8873	498.112	91.1117	8651.39	0.434536	154.356	178.43	0.865081	2.53293	0	0.282749	23.0495	22.0495	0.263705	39.2604	38.2604	0.367216	1.3434	1.58275	2.76136
Td-H2N_CA - 23	rim			17.645	0.777189	<5.9832	177.219							0.432134		1206.36	0.876474	<0.11522	<0.048965	4.40766	0.146712	3.48702	7.54562	1.74984	35.7761	10.7124	126.213	43.5105	189.671	36.8201	314.384	57.1518	8245.31	0.270195	76.3239	114.478	0.666713	2.4909	0	0.325595	18.1901	17.1901	0.316631	36.1912	35.1912	0.462491	1.23528	1.54643	2.89226
Td-H2N_CA - 24	rim	few common-Pb		16.926	0.776947	<5.9516	224.355							0.426097		1171.77	1.22983	<0.10176	<0.059758	5.36546	0.122863	2.72935	5.85165	1.37601	31.2998	9.8512	117.225	41.166	187.48	37.6596	322.546	60.2843	9005.23	0.403204	91.6776	145.708	0.629188	2.75152	0	0.310839	35.4372	34.4372	0.290368	33.4986	32.4986	0.317187	1.53703	1.51186	3.07406
Td-H2N_CA - 27	rim			16.101	0.465897	<5.8933	394.235							0.550658		3249.82	3.25278	0.133517	0.0549692	13.0993	0.506265	6.82634	15.479	3.46398	84.7261	27.2855	326.748	115.225	515.421	99.2787	852.661	153.422	8585.96	0.906661	350.469	431.458	0.81229	2.60954	0	0.292428	33.7616	32.7616	0.275466	72.4993	71.4993	0.426816	1.51537	1.8543	2.93056
Td-H2N_CA - 29	rim			16.981	0.498552	<5.9576	258.601							0.419733		1406.05	1.27461	<0.11118	<0.050477	6.83892	0.194999	3.18552	6.0738	1.44765	33.3667	10.8772	131.587	48.7605	225.919	45.7141	400.856	74.0405	8774.77	0.475753	114.906	182.231	0.630554	3.04631	0	0.310885	45.1382	44.1382	0.272066	75.5636	74.5636	0.364441	1.64481	1.87253	2.97059
Td-H2N_CA - 33	rim			17.627	0.568589	<6.7726	445.273							0.398028		1852.15	5.72182	0.140558	<0.056237	15.7796	0.114826	2.10619	4.56428	1.06277	37.3008	12.6663	164.996	63.7962	304.602	60.3433	542.363	101.035	8696.1	1.54437	391.393	566.774	0.690563	3.28713	0	0.249011	236.437	235.437	0.212547	70.8723	69.8723	0.156889	2.37187	1.8443	3.69337
Td-H2N_CA - 35	core/inner part			16.435	0.56345	<5.9377	200.733							0.580662		1537.41	1.143	<0.12011	<0.05374	5.02539	0.204505	4.14479	8.63444	2.13675	41.4287	13.5167	153.526	54.6543	244.994	47.5724	411.355	76.492	8163.31	0.328425	103.655	147.53	0.702601	2.67939	0	0.345389	19.7002	18.7002	0.321252	15.8407	14.8407	0.328004	1.27185	1.17145	2.85818
Td-H2N_CA - 36	core/inner part of 35		shorter avoid melt	16.986	0.970883	<6.1456	169.644							0.403348		1561.18	1.20232	<0.099734	<0.048456	5.80775	0.19871	3.35143	8.01783	2.14536	43.8552	13.1923	154.139	54.787	249.442	49.0474	427.492	79.2764	8687.49	0.370793	109.881	159.618	0.688397	2.77342	0	0.349772	29.9334	28.9334	0.343932	80.8635	79.8635	0.564935	1.4614	1.90235	2.90486
Td-H2N_CA - 40	rim		shorter avoid melt	17.617	0.56304	<5.9301	368.255							0.755991		1677.35	3.06299	<0.095813	<0.038436	8.43309	0.0987868	1.87749	3.77416	1.06605	29.2995	10.8376	142.542	56.8648	275.76	56.0129	500.429	93.5198	8480.09	0.823838	139.85	236.82	0.590532	3.51074	0	0.309928	160.024	159.024	0.247869	61.7472	60.7472	0.198647	2.20146	1.78353	3.37972
Td-H2N_CA - 42	rim		shorter avoid high La (apatite?)	16.403	0.342746	<5.8786	465.397							0.526153		3573.51	3.80351	<0.095699	0.0906904	18.8825	0.578201	8.7536	19.0288	3.24694	99.1394	30.4302	356.34	126.724	560.804	110.823	950.157	169.803	9094.64	1.21068	507.636	653.225	0.777122	2.66644	0	0.228543	35.2687	34.2687	0.218145	35.2997	34.2997	0.249143	1.5349	1.53529	3.05298
Td-H2N_CA - 43	core/inner part of 42		shorter avoid melt	16.941	0.562344	<5.8417	457.505							0.770785		3048.3	4.83672	<0.091298	<0.036418	16.332	0.395227	6.38001	13.5082	2.44422	74.8479	23.8228	293.011	106.364	485.532	96.4258	836.988	152.977	8834.12	1.28008	390.096	523.523	0.745136	2.85651	0	0.235004	50.515	49.515	0.214233	55.4518	54.4518	0.250796	1.69474	1.73601	3.12209
Td-H2N_CA - 44	core/inner part			16.69	0.524271	<5.9637	329.612							0.447934		1456.55	3.13412	0.119695	<0.035634	7.53127	0.069386	1.71152	3.92503	1.02515	24.8693	9.07804	123.247	49.6747	248.758	51.4136	470.68	91.7193	8337.2	0.854084	113.681	234.716	0.484332	3.819	0	0.317218	155.89	154.89	0.261581	165.266	164.266	0.292853	2.19002	2.21555	3.52927
Td-H2N_CA - 46	rim of 45			16.952	0.478497	<5.9649	415.121							0.567118		2496.54	2.34305	<0.11686	0.042195	11.1304	0.32922	5.81338	12.6303	2.29339	65.9974	20.7685	245.468	88.1805	400.179	78.4184	677.563	124.254	9193.35	0.84762	286.861	400.354	0.716519	2.76029	0	0.242846	33.7422	32.7422	0.227758	160.239	159.239	0.462511	1.51511	2.20205	3.08496
Td-H2N_CA - 47	core/inner part			16.507	0.484822	<5.9698	443.874							0.759224		3191.44	3.6842	<0.13002	0.109534	16.6507	0.677894	12.3574	21.703	4.01618	100.513	29.5251	335.337	116.637	503.727	98.651	823.986	147.778	8992.55	0.946679	465.662	590.341	0.788802	2.45719	0	0.262885	17.9834	16.9834	0.245787	175.178	174.178	0.64583	1.23002	2.24099	2.93994
Td-H2N_CA - 49	rim of 48	few common-Pb		17.047	0.58224	<6.0399	343.235							0.469618		2387.6	2.04681	<0.11663	0.0520119	9.17517	0.384083	6.27934	13.2906	2.97216	70.8743	21.5496	248.402	86.5984	380.933	73.3676	612.554	110.726	8416.37	0.582824	240.228	286.063	0.839775	2.46598	0	0.29606	22.2077	21.2077	0.284615	39.5663	38.5663	0.40814	1.32649	1.58621	2.87204
Td-H2N_CA - 50	rim			17.532	0.588688	<5.9564	331.135							0.416028		1225.54	3.17841	<0.082523	<0.049121	8.11163	0.0736172	1.73743	3.53635	0.788659	21.8757	7.77346	104.291	41.4058	203.395	43.862	396.544	76.9411	8759.65	1.02071	148.021	303.906	0.487061	3.80228	0	0.274128	156.609	155.609	0.222583		-1		2.19203	#NUM!	3.61576
Csv-2
Csv2chage - 3				20.235	0.473869	<5.885	270.575							0.412887		800.531	2.62967	0.133168	0.0598263	10.0692	0.0557212	0.801608	1.99494	0.452607	14.3239	5.14748	66.8197	26.7455	134.526	29.3044	276.864	52.8209	10751	1.02981	105.676	246.421	0.428843	4.14345	0	0.25885	475.956	474.956	0.22085	154.671	153.671	0.159219	2.67665	2.18659	3.64566
Csv2chage - 4				18.668	0.546112	<5.8579	422.672							0.384965		837.043	2.71835	0.265792	0.0546211	9.6925	0.0501639	0.703599	2.088	0.540658	13.5435	5.09147	67.3894	26.828	137.879	31.3271	305.014	58.8169	10107.9	0.935112	108.216	281.01	0.385096	4.52615	0	0.310825	562.383	561.383	0.271339	111.437	110.437	0.159431	2.74926	2.04312	3.74833
Csv2chage - 7				19.319	0.445766	<6.0537	308.946							0.18496		1740.63	4.62581	0.237128	<0.062729	20.2264	0.245153	4.21037	7.93271	1.8487	45.1132	13.9425	167.286	60.6498	279.768	57.7603	503.593	91.3031	9488.73	1.30515	271.844	426.213	0.637813	3.01037	0	0.298764	95.6968	94.6968	0.267475	251.313	250.313	0.427092	1.97634	2.39848	3.24019
Csv2chage - 14				18.476	0.347991	<6.0305	382.45							0.396562		1332.92	5.50598	0.0899698	<0.039523	15.6036	<0.039394	1.41402	3.89069	0.714423	25.5517	9.1133	118.348	45.1552	222.225	47.5323	442.672	84.301	10307.6	1.80644	179.86	426.176	0.422033	3.74044	0	0.219057	357.852	356.852	0.195858	200.127	199.127	0.175537	2.55249	2.29913	#VALUE!
Csv2chage - 15				18.665	0.399552	<6.2519	412.171							0.500304		1523.41	5.54782	<0.10302	0.044697	28.1458	0.141417	2.91828	5.64434	1.24555	32.136	10.6367	138.412	52.5725	250.751	51.7531	472.182	86.4602	8850.69	1.60353	485.994	568.535	0.854818	3.41142	0	0.282738	247.953	246.953	0.239032	99.6022	98.6022	0.185106	2.39261	1.99389	3.60426
Csv2chage - 20				18.981	0.400553	<6.2739	261.679							0.303167		1338.59	4.95685	<0.093434	<0.042139	17.6483	0.160265	2.08717	5.29316	1.0342	27.65	9.46349	119.306	45.6543	224.423	47.795	445.352	83.8632	10039.7	1.64073	201.224	410.514	0.490176	3.73285	0	0.26135	225.008	224.008	0.235792	155.326	154.326	0.221088	2.35026	2.18844	3.40849
Csv2chage - 22				18.466	0.407078	<5.979	304.095							0.480524		1625.56	3.0054	<0.084418	<0.050404	19.6614	0.253022	4.01593	8.37498	1.59291	41.6759	13.3184	159.215	57.642	263.768	53.4856	472.916	85.491	10465.7	1.0486	263.555	402.511	0.654777	2.9703	0	0.260664	91.0376	90.0376	0.238543	30.1555	29.1555	0.173759	1.95442	1.46472	3.20162
Csv2gch - 2	rim	n.d.	*	n.d.	n.d.	Below LOD		4.81925	725.566	36.4238	711.845	742.295			504600	1132		0.068	Below LOD	18.52	0.076	1.41	3.24	0.805	20.85	7.54	95.3	38.4	179.7	41.09	401.3	76.5	9760		169.3	340.3	0.497502	4.21091	51.7008	0.299429	457.585	456.585	0.252816	188.478	187.478	0.1925	2.65952	2.27295	3.65105
Csv2gch - 3	core/inner part	n.d.	*	n.d.	n.d.	Below LOD		5.7117	741.138	37.4301	726.989	758.397			503500	1159		0.057	0.018	14.5	0.16	2.96	5.91	1.36	29.1	9.74	111.3	41.1	178.6	38.5	339.5	62.9	9830		174.1	272.3	0.639368	3.05031	51.2208	0.317046	92.7104	91.7104	0.284681	30.6226	29.6226	0.20263	1.96242	1.47162	3.23093
Csv2gch - 11	core/inner part	n.d.	*	n.d.	n.d.	Below LOD		8.03208	773.897	39.5964	758.826	792.299			511100	1937		0.096	0.048	23.6	0.504	7.8	12.88	3	59.4	17.7	193.4	69.4	294	62.4	558	100.7	9084		336	405	0.82963	2.88521	56.2638	0.331584	44.7276	43.7276	0.303015	260.653	259.653	0.623704	1.64076	2.41439	2.90502
Csv2gch - 14	rim	n.d.	*	n.d.	n.d.	Below LOD		6.20517	748.91	37.9381	734.545	766.437			506900	2080		0.197	0.0187	38.72	0.179	3.29	7.06	1.461	44.2	15.79	192.8	73.9	324.2	70	623.2	111.7	10358		707	869	0.813579	3.23237	48.938	0.252848	300.644	299.644	0.21807	501.676	500.676	0.302511	2.47661	2.69956	3.68617
Csv2gch - 17	core/inner part	n.d.		n.d.	n.d.	Below LOD		7.66459	769.272	39.2865	754.333	787.511			504800	3760		0.195	0.155	45.1	1.11	19.2	28.8	6.41	125.1	36.4	389	133.8	553	111.8	983	175.3	8830		810	720	1.125	2.52699	57.1687	0.32648	28.3706	27.3706	0.300159	97.9239	96.9239	0.510289	1.43728	1.98643	2.81201
Td-Fgch - 6			Ap incl begin and end , very short	17.25		<9.7899	370.988						<0.30689		460907	929.873	2.66677	<0.56477	0.549766	12.5183	0.196025	1.71909	2.75114	0.451693	17.7378	6.04608	80.4119	30.3241	145.082	30.8302	280.948	57.8628	9649.56	0.866855	127.643	275.266	0.463709	3.49386	47.7645	0.19768	224.492	223.492	0.154935	266.882	265.882	0.169961	2.34926	2.42469	3.14744
Tibolddaróc unit
TdEchage - 4			shorter avoid La	15.64	0.387313	<5.9987	261.823							0.381874		1279.72	7.25654	0.145987	<0.045555	9.02933	0.0493184	0.883934	3.12473	0.440676	23.1513	8.61527	117.484	45.0265	215.613	45.1247	397.083	68.0465	9873.76	2.26802	196.267	491.009	0.399721	3.37989	0	0.158398	342.132	341.132	0.147618	73.948	72.948	0.104396	2.53292	1.86301	3.99808
TdEchage - 6			shorter avoid apatite	15.899	0.543641	<9.915	690.797							<0.33957		3670.88	6.88241	<0.17282	0.290527	25.1657	0.630683	12.8736	22.7852	1.99454	110.154	33.6539	392.606	136.976	592.818	114.643	962.787	167.532	7863.47	1.57549	609.322	785.357	0.775854	2.4523	0	0.121713	28.0074	27.0074	0.111304	198.772	197.772	0.26618	1.43148	2.29617	3.09526
TdEchage - 7			shorter avoid apatite	15.449	0.235865	<8.0238	403.281							0.548642		2498.69	16.1518	<0.12446	<0.041664	10.0654	0.0471384	1.31962	4.39038	0.523688	40.7245	16.7914	227.486	88.0451	418.187	84.1085	737.284	131.45	12282.3	5.33065	397.789	1075.62	0.369822	3.24101	0	0.119734	307.741	306.741	0.105028	235.106	234.106	0.122465	2.48677	2.36941	4.35829
TdEchage - 8			shorter avoid apatite	16.042	0.558533	<7.5392	295.369							0.447123		1856.25	2.65604	<0.11515	<0.077223	13.7233	0.217175	3.88333	6.96121	1.58214	43.2689	14.3158	179.833	64.8538	297.377	63.061	573.558	100.345	9263.32	0.876186	224.964	364.652	0.616927	3.18939	0	0.2787	84.3169	83.3169	0.235598	192.682	191.682	0.360977	1.92073	2.28258	3.22507
TdEchage - 9				14.805	0.222485	<6.2121	486.487							0.85545		4265.73	8.57887	<0.09455	<0.041871	11.1846	0.192527	4.70427	14.4442	1.31769	95.8161	33.0563	427.616	156.242	696.996	137.586	1158.43	195.842	10740.6	2.2992	583.979	1152.05	0.506906	2.70905	0	0.108286	54.2608	53.2608	0.104251	56.8978	55.8978	0.135118	1.72641	1.7474	3.77698
TdEchage - 10			shorter avoid melt	26.095	3.14822	<8.2593	406.224							0.348521		1193.19	3.49091	0.124875	<0.058869	10.7566	0.0470514	1.36559	2.8041	0.661822	20.6095	7.40976	98.1547	39.491	196.336	42.9926	396.742	76.6089	9894.91	1.43431	109.017	259.605	0.419934	4.04201	0	0.266155	305.48	304.48	0.214076	209.18	208.18	0.202007	2.48356	2.31844	3.74174
TdEchage - 11			shorter avoid melt	15.564	0.274648	<6.2669	569.46							0.9631		4943.76	10.3937	<0.089782	<0.057619	22.993	0.472275	8.87517	22.4111	2.1399	126.819	41.5146	503.393	178.647	785.822	151.794	1298.43	216.986	9344.59	2.23329	772.046	1074.71	0.718373	2.57936	0	0.122713	45.8791	44.8791	0.117938	77.7784	76.7784	0.176433	1.65204	1.88524	3.3571
TdEchage - 12			zoned (U, Th,Yb, Lu, Y	15.095	0.248814	<6.2148	335.604							0.699016		3396.24	7.45021	<0.079146	<0.031107	7.48191	0.0805089	2.29644	9.48579	0.832149	71.1484	25.8873	336.872	124.829	569.511	113.626	969.545	161.53	11425.6	2.23002	429.5	999.261	0.429817	2.87808	0	0.0979276	87.8303	86.8303	0.0990136	204.664	203.664	0.181738	1.93867	2.30891	4.09383
TdEchage - 13			shorter avoid apatite	14.838	0.275402	<7.1778	336.685							0.597171		3029.78	8.89796	<0.10223	<0.070851	13.3766	0.131656	2.7358	8.65992	0.842824	62.9343	22.9412	295.654	108.847	501.32	101.399	859.336	148.398	11049.4	2.37786	399.919	794.044	0.503648	2.90656	0	0.110372	131.858	130.858	0.103907	91.9606	90.9606	0.115083	2.1168	1.95885	3.7804
TdEchage - 15				15.04	0.222097	<6.5633	450.465							0.695221		3741.91	18.5224	<0.093778	0.0464007	11.8757	0.0773503	2.16976	8.9989	0.817579	69.6998	26.553	355.391	134.072	617.304	123.963	1057.17	184.506	11595.5	5.18117	662.453	1492.71	0.443792	2.97468	0	0.0998028	168.896	167.896	0.0977978	365.51	364.51	0.171883	2.22504	2.56171	4.28551
TdEchage - 16				15.092	0.209261	<6.4841	460.448							0.790244		5424.49	10.4696	<0.090932	<0.058026	15.9389	0.398203	7.60524	21.1174	1.82795	133.59	44.4637	553.27	194.521	866.137	166.911	1392.22	234.461	10127.4	2.54895	839.5	1298.45	0.646538	2.51635	0	0.105216	40.5325	39.5325	0.102153	230.467	229.467	0.248812	1.59695	2.36072	3.51332
TdEchage - 19				15.319	0.222441	<6.5044	530.531							0.82061		3159.58	9.96942	0.108672	<0.043848	7.59349	0.0958321	2.46934	8.94407	0.779752	64.9559	24.0746	313.748	117.46	536.198	107.11	928.779	155.548	10205.8	2.66287	441.555	1095.97	0.402892	2.96027	0	0.0989016	85.0235	84.0235	0.095536		-1		1.9244	#NUM!	4.05829
TdEchage - 21				15.366	0.393578	<6.2538	304.017							0.526741		2966.22	7.55346	0.146348	0.0480326	14.282	0.404614	6.08365	13.7567	1.34042	79.6288	25.6981	311.705	111.29	495.935	97.3988	829.849	139.601	10834	2.1225	432.019	703.741	0.61389	2.66229	0	0.123815	43.0996	42.0996	0.115548	332.013	331.013	0.301408	1.62428	2.51984	3.24037
TdEchage - 24			shorter avoid melt	16.451	0.432048	<8.1715	269.313							0.697091		2542.7	8.06723	<0.11932	<0.081856	8.14113	0.0750909	1.56345	6.63641	0.703327	52.3879	18.6636	237.816	93.454	433.039	87.2477	767.71	126.987	11610.7	2.64956	307.242	756.259	0.406265	3.22817	0	0.115318	154.082	153.082	0.117241		-1		2.18492	#NUM!	4.00308
TdEchage - 25				15.199	0.255449	<6.4118	346.741							0.703418		3850.49	7.09234	<0.079281	0.0528378	12.5925	0.359953	7.44106	16.6134	1.47617	95.5811	31.6148	393.322	141.677	629.461	123.693	1055.69	178.151	10062.6	1.90193	510.546	924.161	0.552443	2.68403	0	0.113252	32.7238	31.7238	0.103424		-1		1.50139	#NUM!	3.4095
Szomolya
SZOM - 5	rim			17.614	0.419184	<6.2442	224.197							0.276509		790.306	1.23628	<0.088322	<0.067685	7.36169	0.0701655	1.1201	2.43474	0.664476	12.861	4.72002	61.5738	24.7793	132.523	32.1358	326.054	68.8752	10533.5	0.558463	211.648	342.476	0.617994	5.29534	0	0.363027	274.214	273.214	0.292704	110.212	109.212	0.196278	2.4365	2.03827	3.68851
SZOM - 6	core/inner part of 7			18.316	0.398812	<6.2112	236.291							0.566171		1048.21	2.16714	<0.11845	<0.051923	11.1256	0.0758661	1.43817	3.27163	0.596024	16.9132	6.15556	80.5349	33.1578	175.401	41.4102	420.47	87.5991	9871.34	0.841449	279.068	410.912	0.679143	5.22096	0	0.244959	312.707	311.707	0.200396	390.456	389.456	0.209255	2.49375	2.59046	3.7337
SZOM - 7	rim			17.834	0.439045	<6.0412	200.684							0.288179		694.969	1.55252	<0.11486	<0.067465	7.17955	<0.036461	0.73362	1.46878	0.342674	9.8388	3.69523	50.6682	21.5274	116.505	28.0289	295.187	61.5049	10385.4	0.73197	192.652	352.886	0.545933	5.82588	0	0.275585	543.223	542.223	0.20812	174.462	173.462	0.130437	2.73418	2.2392	#VALUE!
SZOM - 8	rim			16.877	0.273963	<6.0858	246.833							0.602408		1011.3	3.67872	<0.12347	<0.05508	11.9419	0.0359875	0.728103	1.91653	0.353099	13.0974	5.12286	76.3649	32.1605	171.552	40.3635	414.707	86.0269	10672.9	1.87604	444.158	831.948	0.533877	5.43059	0	0.215462	971.401	970.401	0.169524	253.144	252.144	0.103604	2.98695	2.40165	4.36394
SZOM - 9	rim		shorter avoid apatite	16.856	0.333293	<6.0302	210.962							0.6202		520.154	1.44872	<0.095965	<0.038836	6.31492	<0.03668	0.412592	0.992449	0.302211	6.32983	2.53887	37.1222	15.808	90.5929	23.0702	257.815	55.3562	10853.6	0.77126	131.37	297.738	0.441226	6.94504	0	0.368624	1090.22	1089.22	0.276908	139.06	138.06	0.118329	3.03712	2.14007	#VALUE!
SZOM - 10	rim		shorter avoid apatite	17.532	0.360091	<6.9441	197.092							0.403895		453.896	1.57377	<0.13968	<0.058648	6.58051	<0.030682	0.329098	0.827481	0.122041	5.52757	2.1665	31.2663	13.8189	78.7616	19.5293	212.045	46.7231	10152.5	0.817695	174.146	386.575	0.450484	6.78191	0	0.174455	1415.61	1414.61	0.133646	323.264	322.264	0.0719247	3.15064	2.50821	#VALUE!
SZOM - 11	rim of 10			17.259	0.419318	<5.9168	198.754							0.196962		632.202	2.19105	0.112452	<0.042614	7.10308	<0.028222	0.337313	1.08281	0.238906	7.71863	2.95819	42.0422	18.6452	109.101	27.6276	303.85	65.658	10225.1	1.10786	149.919	353.7	0.42386	7.22727	0	0.252641	1566.05	1565.05	0.208222	388.135	387.135	0.118637	3.19453	2.58786	#VALUE!
SZOM - 12	core/inner part of 10		shorter avoid apatite	17.804	0.481758	<8.8492	361.584							0.539559		1709.97	2.04601	<0.15814	0.0427965	15.7756	0.107499	3.24086	5.64042	0.870598	30.6784	9.99893	135.34	54.3849	274.538	66.78	643.666	127.835	10433	1.01739	510.665	745.587	0.684916	4.75591	0	0.202334	173.581	172.581	0.160446		-1		2.23699	#NUM!	3.84109
SZOM - 13	rim of 10			18.27	0.563921	<6.2622	217.202							0.50656		458.693	1.47043	<0.10525	0.0129814	5.04919	0.0336722	0.35592	0.585166	0.180056	4.63858	2.02005	30.1317	13.7227	79.1354	19.7576	214.685	47.5624	10515.1	0.747214	95.691	268.933	0.355817	7.12489	0	0.334118	1321.92	1320.92	0.21357	140.066	139.066	0.0845464	3.12088	2.14322	3.90237
SZOM - 14	rim		shorter avoid apatite	17.517	0.253779	<5.9477	271.825							0.498987		1215.82	4.8319	<0.1067	0.129449	18.702	0.0831529	0.998402	1.86658	0.477276	16.7214	6.54605	93.6095	38.3324	204.263	48.0187	489.365	99.041	11201.1	2.68242	844.622	1333.5	0.633387	5.22773	0	0.261176	1189.51	1188.51	0.188721	726.451	725.451	0.161325	3.075	2.86061	4.20512
SZOM - 15	rim		shorter avoid apatite	17.792	0.338191	<9.3128	294.844							0.604959		1216.84	5.33389	<0.16269	0.365227	18.6834	0.125288	1.47018	2.53547	0.530282	16.9377	6.44318	90.1584	38.0218	200.376	47.1959	463.588	98.0338	9586.28	2.38329	646.278	1115.79	0.579212	5.14193	0	0.247386	662.921	661.921	0.178825	621.002	620.002	0.170059	2.82081	2.79239	3.94967
SZOM - 17	rim		shorter avoid apatite	18.036	0.312835	<6.1023	232.01							0.456607		1023.88	3.96676	0.127659	0.192106	15.1064	0.128432	0.906768	1.58442	0.399478	12.5025	5.08847	71.9775	31.1738	173.946	42.0625	434.843	92.5195	10853.6	1.82791	455.705	800.115	0.569549	6.04137	0	0.274399	1179.54	1178.54	0.189317		-1		3.07134	#NUM!	3.79448
SZOM - 20	core/inner part		shorter avoid apatite	17.197	0.391119	<8.0904	366.329							0.53955		1114.4	3.76335	0.166933	<0.11121	16.2384	0.0502101	1.22964	2.84202	0.651367	15.5598	6.17473	83.9088	34.7436	187.358	43.0396	436.641	93.5708	9286.13	1.53433	742.236	764.104	0.971381	5.20376	0	0.299456	622.732	621.732	0.234432	282.232	281.232	0.168265	2.7936	2.44907	4.18236
SZOM - 21	core/inner part			17.261	0.254912	<5.8244	209.1							0.512315		925.672	2.65657	<0.08302	<0.049414	10.1617	0.0504868	0.756836	2.15568	0.382729	12.613	4.89773	67.9021	29.0563	157.801	37.7103	392.788	84.3981	10823.3	1.23666	257.258	524.725	0.490271	5.78462	0	0.224396	721.875	720.875	0.184279	375.003	374.003	0.140155	2.85786	2.57288	4.01675
SZOM - 26	rim		shorter avoid melt	17.133	0.398423	<8.0445	229.295							0.505493		691.644	1.93308	<0.16511	<0.063728	8.61297	<0.033511	0.710971	1.19579	0.275424	8.98184	3.6761	50.2806	21.1306	118.734	26.8081	277.886	60.7936	9632.71	1.10488	317.581	583.279	0.544475	5.5267	0	0.25693	754.028	753.028	0.178609	163.85	162.85	0.096261	2.87681	2.21179	#VALUE!
SZOM - 27	rim			16.817	0.353144	<5.7626	204.635							0.543198		1286.9	1.31825	<0.11353	0.0658152	11.7272	0.111875	2.17594	3.74456	0.909225	22.5258	7.5062	100.476	39.9484	209.19	49.0966	498.768	104.842	10309.2	0.814718	363.512	496.947	0.731491	4.96407	0	0.30266	215.369	214.369	0.23671	81.9515	80.9515	0.155043	2.33116	1.90823	3.64758
SZOM - 29	core/inner part			17.257	0.293173	<5.7824	278.521							0.577171		1130.08	4.19413	<0.1032	<0.056946	14.3628	0.0537736	0.630081	1.95202	0.37064	14.8378	5.70851	84.6403	35.8848	193.072	46.1979	463.438	96.0216	11308.7	2.31788	419.153	899.965	0.465744	5.47538	0	0.210547	1423.5	1422.5	0.173637	790.374	789.374	0.145702	3.15305	2.89728	4.22366
SZOM - 33	rim		shorter avoid apatite	17.916	0.268053	<5.8508	304.151							0.351023		854.998	2.3114	0.138346	0.0811368	8.98592	0.0430306	0.670752	1.48272	0.331934	9.47576	4.08695	59.0821	26.8121	148.428	37.0537	398.976	85.0444	10406.4	1.0735	274.095	556.072	0.492914	6.75291	0	0.270732	992.853	991.853	0.192621	258.533	257.533	0.110107	2.99645	2.41083	4.11135
SZOM - 35	rim		shorter avoid apatite	18.174	0.326569	<6.2108	141.908							0.338828		741.188	2.88651	<0.081355	0.0646301	10.2819	<0.039973	0.489417	1.29718	0.366976	10.1835	3.66035	55.4055	22.995	126.088	31.0454	329.447	67.4719	11262.9	1.49857	395.552	722.916	0.547162	5.94611	0	0.308682	1362.24	1361.24	0.248331	689.505	688.505	0.193602	3.13393	2.83791	#VALUE!
SZOM - 36	core/inner part		shorter avoid apatite	16.929	0.267764	<6.2299	260.346							0.489064		1108.03	2.13928	<0.12311	<0.044004	10.3708	0.100951	1.03743	2.32929	0.569755	15.8225	6.1004	82.686	34.3653	188.583	45.8583	483.866	98.7808	10261.6	1.00541	378.183	659.55	0.573395	5.85185	0	0.286921	561.015	560.015	0.222405	315.385	314.385	0.175843	2.7482	2.49746	3.81514
SZOM - 38	core/inner part	young outlier	shorter avoid high La	16.15	0.280211	<6.0717	307.298							0.467023		1554.8	5.67244	<0.11247	<0.065976	19.6501	0.0514119	1.10552	2.241	0.689158	18.5309	8.27379	116.04	49.1907	257.489	61.3523	639.661	128.236	10050.2	1.86077	739.42	1019.36	0.725376	5.51242	0	0.326944	1231.33	1230.33	0.229794	1000.71	999.712	0.219779	3.09002	2.99987	4.29726
SZOM - 40	rim			17.521	0.406069	<5.8641	196.373							0.511715		1104.96	1.33929	0.119018	<0.041907	9.97156	0.121538	1.91999	3.5895	0.913255	18.6304	6.70017	87.3499	34.7752	183.22	42.3401	430.46	90.3791	9937.65	0.587124	258.65	361.046	0.716389	4.92799	0	0.341419	197.016	196.016	0.26829	126.217	125.217	0.213817	2.29229	2.09766	3.47285
SZOM - 41	rim	few common-Pb		16.61	0.431752	<6.5223	175.685							0.277643		1479.1	2.18284	<0.10941	0.0513891	6.32178	0.21943	3.51864	5.84703	1.04858	28.9646	8.95822	116.209	45.668	237.739	55.0409	536.732	106.323	9200.76	0.860623	260.46	403.937	0.644804	4.61868	0	0.246334	54.1826	53.1826	0.200552	136.713	135.713	0.271751	1.72577	2.13262	3.26502
SZOM - 44	rim			17.763	0.482945	<6.2763	193.797							0.278968		1007.45	3.6336	<0.091441	<0.051684	10.7156	0.0442406	0.767759	2.10934	0.473273	15.0348	5.99312	83.329	33.9315	174.442	38.8972	370.461	74.205	8780.69	1.14574	268.011	429.298	0.624302	4.44577	0	0.25693	668.416	667.416	0.210398		-1		2.8244	#NUM!	3.98694
SZOM - 51	rim		shorter avoid apatite	18.211	0.474977	<6.6014	232.294							0.523933		1170.86	4.45697	<0.1072	0.161575	16.2002	0.0834714	1.16852	2.32944	0.487335	14.489	5.45046	82.0475	35.0144	197.098	48.4838	508.058	109.77	9859.04	1.73078	451.344	771.951	0.584679	6.19225	0	0.256452	873.519	872.519	0.187333	639.493	638.493	0.155465	2.94077	2.80516	3.96605
SZOM - 52	rim			18.039	0.398348	<6.0502	197.736							0.390552		600.458	1.87411	<0.087312	0.0418233	8.98247	0.0335777	0.407886	1.15264	0.297924	8.5832	3.03779	43.1034	18.202	98.3991	24.733	251.919	53.3778	10283.9	0.929003	288.805	469.101	0.615657	5.84453	0	0.289573	1291.06	1290.06	0.242861	81.488	80.488	0.0853173	3.11061	1.90573	4.14522
SZOM - 53	rim of 52			17.262	0.260545	<6.0096	230.485							0.283902		1264.94	5.42356	0.0966116	0.0389643	19.0308	0.0608491	0.635449	1.78069	0.515765	14.1422	5.80498	86.3618	38.3272	218.446	53.9663	564.849	121.48	9752.92	2.05177	441.516	807.251	0.546938	6.5405	0	0.314212	2423.45	2422.45	0.240379	627.586	626.586	0.144326	3.38426	2.79698	4.12275
SZOM - 54	rim			17.083	0.279782	<6.1047	239.43							0.421461		1245.35	5.12111	<0.10819	0.0496405	15.5679	0.0399929	0.721778	2.12088	0.384845	16.348	6.43222	92.9851	39.5027	210.504	50.0761	506.727	105.595	10700.6	2.6555	569.307	1187.85	0.479274	5.44955	0	0.199811	1343.07	1342.07	0.162192	195.758	194.758	0.0815898	3.12778	2.2895	4.47278
SZOM - 56	rim of 55			18.534	0.318581	<6.6739	318.784							0.515882		1565.27	6.27192	<0.13617	0.0593435	19.6812	0.102103	1.35891	3.93389	0.816004	26.815	10.0146	132.487	52.275	259.832	56.2609	538.006	106.703	8786.56	2.04704	934.086	1054.94	0.885436	4.06082	0	0.242893	554.357	553.357	0.212833	830.679	829.679	0.271735	2.74301	2.91891	4.01419
SZOM - 57	core/inner part			17.423	0.918945	<6.0409	190.462							0.299401		491.772	1.46295	<0.10951	0.0332803	6.10769	0.0358691	0.219479	0.925876	0.226157	5.43883	2.28898	33.5939	14.9088	84.478	20.8838	225.92	50.5152	10504.3	0.69629	99.0227	226.284	0.437603	6.72502	0	0.308109	1964.67	1963.67	0.264517	208.358	207.358	0.110614	3.29307	2.31672	3.79993
SZOM - 58	core/inner part of 57		shorter avoid melt	18.318	0.431068	<7.355	135.411							<0.25308		553.032	1.93389	<0.09252	<0.069901	7.42332	<0.02818	0.414238	0.943848	0.138777	6.5601	2.55274	38.1149	16.6186	92.3002	22.8462	243.364	53.2048	10307.6	1.13241	196.521	442.324	0.444292	6.38501	0	0.170504	1261.35	1260.35	0.126931	236.066	235.066	0.0639989	3.10049	2.37119	#VALUE!
SZOM - 60	rim			16.798	0.286308	<5.9198	241.715							0.411459		1148.77	5.11278	<0.10981	<0.042526	14.8977	0.0391079	0.592856	1.67177	0.413828	14.5336	5.73602	83.3564	35.8866	195.692	47.6869	487.861	103.489	10726.2	2.57723	608.811	1028.93	0.591693	5.85271	0	0.256666	1814.01	1813.01	0.203162		-1		3.2584	#NUM!	4.42012
Td-J
LR-01_Td-Jgch - 5	core/inner part		short,endCaPincl	16.21		<4.2275	273.265						0.247935		492061	1097.79	3.88432	<0.19489	0.960145	12.6037	0.459646	2.34192	3.79727	0.217632	20.6238	7.25586	100.45	39.0169	189.026	40.466	362.201	64.655	10220	1.41842	161.933	350.274	0.462304	3.6058	48.1469	0.0751842	158.881	157.881	0.0577021	121.403	120.403	0.0565909	2.19833	2.08064	2.88198
LR-01_Td-Jgch - 7	rim		ok	16.36		<3.0885	231.679	2.96224	683.496	33.7804	670.9	698.835	0.323583		478486	1143.42	5.88165	<0.094482	<0.034024	15.886	0.0545704	0.952915	2.38527	0.469285	16.6863	6.25728	86.9467	36.3072	192.294	45.2167	452.218	91.3533	8958.18	2.02247	419.675	772.743	0.543097	5.2011	53.4133	0.227411	861.769	860.769	0.18355	455.372	454.372	0.148686	2.93489	2.65741	4.15108
LR-01_Td-Jgch - 15	rim		shorter,1stpartP,Caincl	16.24		<3.7322	114.776						0.125345		463066	589.356	2.42946	<0.18018	<0.046353	6.25732	0.0228969	0.346549	0.901968	0.130404	7.09781	2.81727	41.2191	18.3169	99.842	24.2938	259.57	50.8912	9912.9	1.10883	117.478	364.965	0.321889	6.29731	46.7135	0.157564	1287.89	1286.89	0.121048	275.834	274.834	0.0699515	3.10954	2.43907	4.20247
LR-01_Td-Jgch - 18	core/inner part		ok	15.92		<3.0482	149.681						0.129068		477607	729.662	3.55444	<0.10045	<0.036183	8.78471	0.0232448	0.438917	1.2741	0.199784	9.21987	3.66232	53.7571	23.1219	123.435	29.0318	290.666	58.6456	10118.3	1.77569	250.698	619.613	0.404604	5.40703	47.2023	0.178206	1214.49	1213.49	0.143106	205.215	204.215	0.0771719	3.08403	2.31009	4.42579
LR-01_Td-Jgch - 21	core/inner part		shorter,1stpartCaPincl	15.88		<4.4172	301.36						0.173959		471947	811.716	3.88645	<0.18119	0.150037	11.2091	0.0798363	0.584896	1.73511	0.257066	11.18	4.59582	60.9671	25.6641	134.402	32.0986	319.516	63.8481	9563.92	1.71466	372.641	829.757	0.449097	5.2408	49.3466	0.178436	977.24	976.24	0.147699	217.521	216.521	0.0878057	2.98956	2.3355	4.01675
LR-01_Td-Jgch - 23	rim		ok	16.55		<3.0671	247.776	5.38851	735.745	37.0799	721.745	752.82	0.549072		469243	2878.21	2.22446	<0.14725	0.0619939	6.59875	0.564487	8.9487	13.8599	2.3464	62.9656	19.7424	236.946	89.69	443.645	99.5632	972.473	182.475	7377.95	0.811947	566.727	905.743	0.625704	4.10419	63.6007	0.242825	17.3037	16.3037	0.200831	14.0105	13.0105	0.180656	1.21229	1.11429	3.20535
LR-01_Td-Jgch - 24	rim		ok	16.59		<2.9594	203.417						0.247646		470868	893.392	6.30944	<0.087329	0.773099	12.9057	0.211721	1.2743	1.45927	0.202983	10.9553	4.44956	64.7691	28.3288	151.857	36.7767	378.476	76.1064	9994.21	2.6116	279.088	769.76	0.362565	5.84347	47.114	0.155204	683.203	682.203	0.0950774	353.934	352.934	0.0708486	2.83391	2.54769	3.56059
Td-L
TdLchage - 4				17.405	0.500761	<6.4129	258.774							0.439896		1825.3	1.71135	<0.073757	<0.038679	9.66069	0.329111	5.24959	10.0225	2.05587	54.3798	16.3872	191.731	66.1298	294.181	57.3941	492.533	86.3046	8887.05	0.565454	205.787	256.35	0.802761	2.56888	0	0.269223	29.0039	28.0039	0.251061	38.2666	37.2666	0.319196	1.44722	1.57132	2.89149
TdLchage - 5				17.2	0.481538	<7.3345	317.712							0.491842		1171.54	2.56873	<0.1116	<0.051088	8.95605	0.0662136	1.50406	3.55649	0.776975	22.1487	7.68175	100.2	39.5448	197.918	41.3364	373.423	73.5207	8968.23	0.828142	131.373	253.597	0.518038	3.72678	0	0.267637	188.643	187.643	0.230671	267.988	266.988	0.286373	2.27333	2.42649	3.5832
TdLchage - 7				17.452	0.421603	<6.0604	422.305							0.601737		1770.4	2.77509	<0.07948	<0.04729	9.46853	0.152663	2.23597	5.91536	1.22771	33.3026	11.3156	152.715	61.3752	298.923	60.9218	544.014	100.461	8366.86	0.738494	162.833	250.186	0.650845	3.56228	0	0.267417	121.18	120.18	0.238656	231.705	230.705	0.345366	2.07983	2.36306	3.21453
TdLchage - 11				17.309	0.662204	<6.5445	319.793							0.317863		679.708	1.14696	<0.097882	<0.04631	5.40827	0.0726288	1.15118	2.56903	0.537373	14.6988	4.98867	60.9246	23.2194	111.567	23.2542	213.381	40.6737	8857.64	0.424031	57.6586	117.985	0.488696	3.50239	0	0.267346	120.369	119.369	0.236344	75.1125	74.1125	0.214073	2.07689	1.86989	3.21072
TdLchage - 12				17.914	0.794897	<6.3352	229.508							0.476967		985.454	1.02477	<0.10102	<0.044634	5.03349	0.0723456	1.75279	3.86141	0.955839	23.7921	7.7465	94.5586	34.7174	157.279	32.3125	281.117	52.0272	8995.06	0.340542	66.8795	106.769	0.626393	2.97294	0	0.304873	63.3006	62.3006	0.277146	108.162	107.162	0.385384	1.79449	2.03004	3.16903
TdLchage - 14				16.922	0.479857	<5.9183	306.174							0.421944		1457.09	2.89135	<0.098248	<0.06755	8.23155	0.146088	2.04728	4.72321	1.27314	30.1459	10.2167	134.121	51.5171	243.454	51.4209	459.579	84.2216	8561.44	0.861417	128.241	256.767	0.499445	3.42661	0	0.326188	114.277	113.277	0.284561	223.254	222.254	0.415496	2.05414	2.34685	3.24493
TdLchage - 21				17.469	0.353081	<6.0344	454.376							0.519522		2312.35	8.21743	0.170112	0.0357386	22.8487	0.147888	2.552	6.3336	1.26909	41.1951	15.1739	199.668	78.8821	387.927	83.1621	768.154	142.094	9112.68	2.25062	446.201	721.509	0.618427	3.84717	0	0.240197	307.7	306.7	0.204103	636.13	635.13	0.302169	2.48671	2.80286	3.68831
TdLchage - 22				16.833	0.43396	<6.0487	575.725							0.501019		3410.81	2.6261	0.177144	0.0560822	10.6368	0.471271	8.34767	15.8388	3.39461	95.3244	30.1999	359.406	124.42	551.186	104.309	881.316	153.852	8898.45	0.755012	330.95	321.808	1.02841	2.45214	0	0.267085	21.7356	20.7356	0.242423	124.555	123.555	0.55438	1.31672	2.09186	2.83433
Nemti, Arany hill
LR_11_NEMTI - 1	rim			17.1514	0.282811	Below LOD	295	3.67629	701.718	34.9119	688.641	717.652		0.47	477900	1369	3.33	Below LOD	Below LOD	15.3	0.103	2.1	4.39	0.842	26.5	8.94	115.5	47.1	223	52.1	520	98.7	10160		300	598	0.501672	4.50216	47.0374	0.23866	249.882	248.882	0.19975	269.464	268.464	0.211467	2.39599	2.42889	3.76386
LR_11_NEMTI - 3	rim			17.3443	0.292662	Below LOD	321	8.137	775.186	39.683	760.078	793.634		0.56	454200	1644	4.59	0.141	Below LOD	21.7	0.149	2.54	5.17	1.267	32.9	11.71	144.4	57.3	266	58.6	540	103.1	8270		513	649	0.790447	3.73961	54.9214	0.297	259.476	258.476	0.24786	55.8233	54.8233	0.149595	2.41242	1.73896	3.63906
LR_11_NEMTI - 5	rim			16.979	0.229111	Below LOD	277	1.59228	634.715	30.8523	623.363	648.518		0.496	449000	1268	5.22	Below LOD	0.21	14.93	0.115	1.21	3.02	0.494	21.03	8.04	103.4	42.9	202.8	46.7	455	86.3	10930		627	1253	0.500399	4.40039	41.0796	0.189508	500.099	499.099	0.157835	767.513	766.513	0.202245	2.69819	2.88452	4.03725
LR_11_NEMTI - 6	rim			17.5177	0.492109	Below LOD	256	7.14183	762.372	38.8267	747.63	780.369		0.73	489000	1262	5.28	Below LOD	Below LOD	23.16	0.095	1.77	4.16	0.808	24.62	8.63	110.1	43.3	205.4	47.8	478	87.4	10530		353.9	630	0.561746	4.34151	46.4387	0.244087	429.112	428.112	0.210225	502.082	501.082	0.236756	2.63156	2.69991	3.82162
LR_11_NEMTI - 8	rim			17.4218	0.241234	Below LOD	200	2.99723	684.469	33.8403	671.848	699.839		0.671	460000	1085	4.19	Below LOD	0.117	12.99	0.069	0.88	2.32	0.448	16.54	6.49	84.9	35.9	177.8	43.37	437.2	87.8	10730		362	906	0.399558	5.14959	42.8705	0.221101	739.376	738.376	0.181329	536.01	535.01	0.166981	2.86828	2.72836	4.11828
LR_11_NEMTI - 9	rim			17.1023	0.262823	Below LOD	177.3	1.96693	650.751	31.7987	638.997	665.05		0.477	462100	888	2.67	Below LOD	Below LOD	10.39	0.0275	0.68	2.02	0.395	13.07	5.03	67.7	28.55	145.3	35.72	372.2	75.6	10700		267	687	0.388646	5.49778	43.1869	0.235021	775.689	774.689	0.198823	339.071	338.071	0.147857	2.88913	2.52901	4.39762
LR_11_NEMTI - 11	rim of 12			17.3152	0.232963	Below LOD	240	4.21485	713.617	35.6619	700.221	729.945		0.525	462000	1075	3.07	Below LOD	Below LOD	17.8	0.065	1.46	3.08	0.61	20.2	7.24	90.8	36.6	169.4	38.9	382	72.7	10150		429	696	0.616379	4.20705	45.5172	0.23643	421.496	420.496	0.196138	186.088	185.088	0.152103	2.62376	2.26738	4.0297
LR_11_NEMTI - 14	rim			17.1245	0.363138	Below LOD	283	6.62668	755.16	38.3492	740.62	772.904		0.67	464500	1880	3.75	0.083	Below LOD	19.7	0.162	3.03	6.22	1.18	36.6	13.6	166	65.5	301	65.2	620	116.6	8760		375	560	0.669643	3.73494	53.0251	0.239095	190.885	189.885	0.198192	193.201	192.201	0.214108	2.27849	2.28376	3.53867
LR_11_NEMTI - 15	inner part			17.3154	0.241442	Below LOD	422	3.95728	708.093	35.3126	694.845	724.237		0.67	460400	1870	3.62	0.095	0.062	19	0.182	2.96	6.54	1.25	36	12.9	159	62.7	292	68.8	674	128.3	9710		508	874	0.581236	4.23899	47.415	0.249054	198.294	197.294	0.211812	192.006	191.006	0.216154	2.29511	2.28105	3.68144
LR_11_NEMTI - 16	rim			17.5246	0.434381	Below LOD	416	3.71141	702.537	34.9632	689.438	718.497		0.53	496000	1075	1.91	Below LOD	Below LOD	9.3	0.038	1.28	2.94	0.55	17.9	6.8	90.7	36.2	171.7	41.5	407	76.4	10130		190.2	452	0.420796	4.48732	48.9635	0.231785	283.476	282.476	0.188654	175.369	174.369	0.166213	2.45098	2.24147	4.07535
LR_11_NEMTI - 19	rim			16.9997	0.272296	Below LOD	225	3.48896	697.242	34.6321	684.284	713.028		0.48	454400	919	2.82	0.109	Below LOD	16.39	0.053	1.19	2.49	0.555	15.72	5.73	74.8	30.52	146.7	35.4	354.8	70.2	9830		417.1	722	0.577701	4.74332	46.2258	0.271201	555.77	554.77	0.218262	226.413	225.413	0.157155	2.74411	2.35298	4.13426
LR_11_NEMTI - 22	rim	disc.		16.941	0.220942	Below LOD	346	5.11636	730.994	36.7729	717.125	747.907		0.7	457000	1716	6.26	0.461	0.155	25.5	0.182	2.47	4.9	1.126	29.7	10.94	140.8	56.7	266.9	61.3	597	113.8	9680		609	895	0.680447	4.24006	47.2107	0.285355	362.896	361.896	0.228738	707.359	706.359	0.307365	2.55858	2.84903	3.69175
LR_11_NEMTI - 24	rim			17.2963	0.190436	Below LOD	276.3	3.93386	707.576	35.28	694.342	723.703		0.61	453000	1296	4.39	Below LOD	Below LOD	20.99	0.076	1.51	3.49	0.709	22.44	8.28	106.6	43.25	203.4	47.81	472.5	90.9	9960		704	1104	0.637681	4.43246	45.4819	0.244932	525.781	524.781	0.203567	735.413	734.413	0.243105	2.71998	2.86594	4.16216
LR_11_NEMTI - 25	rim of 26			17.9732	0.23081	Below LOD	700	4.49584	719.336	36.0255	705.785	735.856		1.36	478600	1379	4.7	0.073	3.1	22.2	0.89	4.5	3.11	0.527	18.52	7	101	44.25	228.7	57.8	624.2	123.1	9870		497	866	0.573903	6.1802	48.4904	0.212292	281.595	280.595	0.117491	348.117	347.117	0.110411	2.44808	2.54048	2.98813
LR_11_NEMTI - 27	rim			17.5977	0.26361	Below LOD	205.2	2.84502	680.164	33.5757	667.655	695.396		0.536	465900	955	3.55	Below LOD	Below LOD	11.28	0.0303	0.724	1.92	0.422	13.93	5.3	72.1	30.9	157.8	39	404	84.1	10250		229.8	650	0.353538	5.60333	45.4537	0.249465	871.443	870.443	0.203338	421.977	420.977	0.155675	2.93974	2.62426	4.33147
LR_11_NEMTI - 30	rim			17.4297	0.318915	Below LOD	186.3	5.37394	735.495	37.0638	721.503	752.562		0.48	460300	747	1.84	Below LOD	0.086	12.89	0.065	1.1	2.02	0.419	12.65	4.65	59.5	24.3	117.5	28.36	283	55.47	9550		151.4	291.5	0.519383	4.7563	48.199	0.253406	465.778	464.778	0.197094	139.635	138.635	0.125287	2.66725	2.14187	3.65173
LR_11_NEMTI - 31	rim			18.2895	0.66166	Below LOD	206	8.18384	775.757	39.7214	760.633	794.225		0.49	480800	1024	2.01	Below LOD	Below LOD	10.86	0.047	1.14	2.57	0.702	18.4	6.74	81.4	32.9	158	35.4	338	63.8	8830		121	219	0.552511	4.15233	54.4507	0.312094	338.106	337.106	0.262911	106.417	105.417	0.185256	2.52777	2.02291	3.66835
LR_11_NEMTI - 32	rim			17.1302	0.347922	Below LOD	167.6	5.19832	732.446	36.8666	718.537	749.409		0.327	465400	660	1.35	Below LOD	Below LOD	8.59	0.067	1	2.04	0.634	11.09	3.94	50.2	21.11	106.1	26.12	273.8	58.19	8690		145	325	0.446154	5.45418	53.5558	0.407504	353.557	352.557	0.327945	123.652	122.652	0.204907	2.54723	2.08867	3.68581
LR_11_NEMTI - 33	rim			17.0406	0.220284	Below LOD	355	4.24998	714.349	35.7083	700.933	730.702		0.746	460300	1490	5.21	0.1	0.5	23.5	0.18	2.06	3.63	0.799	23.7	9.05	119.2	49.4	237	56.2	562	107.2	9860		578	1028	0.562257	4.71477	46.6836	0.263356	485.613	484.613	0.197518	177.912	176.912	0.138508	2.6854	2.24776	3.75672
LR_11_NEMTI - 36	rim			17.4895	0.252557	Below LOD	215	3.47725	696.956	34.6142	684.005	712.733		0.65	452100	1490	2.45	Below LOD	Below LOD	14.23	0.144	2.73	5.66	1.067	31.7	10.66	127.7	50.6	234.4	53.9	529	102.7	9760		392	700	0.56	4.14252	46.3217	0.243529	147.943	146.943	0.210497	228.985	227.985	0.25266	2.16715	2.35791	3.68674
LR_11_NEMTI - 39	core			17.7083	0.591096	Below LOD	198	5.30369	734.285	36.9855	720.326	751.311		0.57	452800	1001	0.74	Below LOD	Below LOD	8.29	0.133	2.47	4.36	1.02	22.9	7.56	91.5	34.3	156	34.2	331	62.8	8640		165	254	0.649606	3.61749	52.4074	0.312078	79.9258	78.9258	0.264061	522.822	521.822	0.549747	1.89722	2.71752	3.28098
LR_11_NEMTI - 40	rimof 42			17.2954	0.316157	Below LOD	244	7.72723	770.073	39.3401	755.111	788.34		0.42	452900	1019	2.1	0.052	Below LOD	13.35	0.096	1.67	3.51	0.756	19.65	7.22	88.9	35.72	161.7	35.05	331.5	63.8	8410		336	438	0.767123	3.72891	53.8526	0.278298	230.144	229.144	0.232597	253.541	252.541	0.256249	2.36011	2.40233	3.6592
LR_11_NEMTI - 42	core of 40	disc.		17.7414	0.53683	Below LOD	318	7.14183	762.372	38.8267	747.63	780.369		0.6	498500	1318	2.06	0.3	Below LOD	16.98	0.134	3	5.54	1.1	28.9	9.67	121.6	46.6	211.2	47.6	443.8	79.7	9840		210.9	345.7	0.610067	3.64967	50.6606	0.265774	140.941	139.941	0.223186	187.748	186.748	0.264598	2.14595	2.27126	3.41159
LR_11_NEMTI - 43	inner part			16.6155	0.291491	Below LOD	227	2.45866	668.312	32.8532	656.11	683.164		0.5	452900	1174	4.68	0.082	Below LOD	14.95	0.042	0.87	2.84	0.56	17.27	7.08	93	39.1	194.1	45.8	463	92	10210		363	797	0.455458	4.97849	44.3585	0.244459	790.154	789.154	0.210425	1079.25	1078.25	0.250521	2.89716	3.03272	4.27821
LR_11_NEMTI - 44	rim of 49			17.1432	0.306016	Below LOD	197	2.37671	665.601	32.6892	653.469	680.367		0.53	467200	865	2.69	Below LOD	Below LOD	10.23	0.04	0.593	1.86	0.351	12.12	4.82	65.4	28.03	142.6	35.13	369.9	74.7	10300		151.7	430	0.352791	5.65596	45.3592	0.226008	932.105	931.105	0.190447	464.58	463.58	0.149993	2.969	2.66613	4.03141
LR_11_NEMTI - 45	inner part			16.9959	0.281537	Below LOD	250	3.02064	685.115	33.8801	672.477	700.506		0.61	454800	1235	5.75	Below LOD	0.048	12.24	0.054	0.54	1.9	0.447	15.52	6.45	90.6	39.66	208.4	52.3	551	114.7	10360		255.1	863	0.295597	6.08168	43.8996	0.251657	1620.22	1619.22	0.209567	1040.71	1039.71	0.18548	3.20931	3.01691	4.20362
LR_11_NEMTI - 46	rim of 41			17.221	0.413572	Below LOD	208	3.24309	691.056	34.2473	678.261	706.64		0.717	484000	872	2.57	0.131	Below LOD	14.71	0.057	1.24	2.58	0.495	15.53	5.52	72.8	29.9	142.3	32.74	331.1	61.3	10500		259.1	518	0.500193	4.54808	46.0952	0.239074	432.895	431.895	0.194414		-1		2.63538	#NUM!	3.95845
LR_11_NEMTI - 47	inner part			17.1897	0.389186	Below LOD	263.9	7.02475	760.771	38.7204	746.074	778.711		0.432	463000	1393	1.01	Below LOD	Below LOD	7.25	0.177	2.92	5.8	1.39	32.6	10.77	127.8	49.5	214	47	436	80.3	8770		153	291	0.525773	3.41158	52.7936	0.309041	57.0321	56.0321	0.271377	185.523	184.523	0.457116	1.74844	2.26605	3.21592
LR_11_NEMTI - 50	inner part			17.7029	0.322649	Below LOD	351	3.8402	705.484	35.1483	692.306	721.542		0.61	473000	1820	2.5	Below LOD	0.032	15.3	0.236	4.39	7.6	1.37	41.5	13.9	166	63.2	283	62.8	591	107.8	9570		374	593	0.630691	3.56024	49.4253	0.235838	82.9503	81.9503	0.197725	624.571	623.571	0.44764	1.91355	2.79489	3.40014
LR_11_NEMTI - 51	rim of 52			16.9806	0.274059	Below LOD	271.9	7.62186	768.722	39.2498	753.799	786.942		0.533	460900	1257	3.32	Below LOD	Below LOD	18.62	0.11	1.86	3.93	0.836	23.5	8.49	108	43.19	201	44.15	419.9	79.5	8730		415.1	535.4	0.775308	3.88796	52.795	0.26595	314.576	313.576	0.220841	33.3836	32.3836	0.101211	2.49634	1.51033	3.68729
LR_11_NEMTI - 54	inner part			16.7347	0.423581	Below LOD	294	3.44213	696.092	34.5604	683.164	711.841		0.56	465000	1830	1.87	0.056	0.086	15	0.257	4.68	8.5	1.68	45.3	14.4	167	63.7	283	61.9	582	106.4	9190		341	524	0.650763	3.48503	50.5985	0.261743	68.6168	67.6168	0.229424	281.759	280.759	0.412608	1.83005	2.44833	3.3094
LR_11_NEMTI - 55	rim			17.5937	0.225273	Below LOD	257	1.74448	641.574	31.2552	630.051	655.588		0.526	455900	1103	1.93	Below LOD	0.072	9.96	0.067	1.38	3.23	0.574	19.4	7.03	88.6	36.6	179.3	42.4	422	83.1	10610		259	629	0.411765	4.76298	42.9689	0.221684	273.922	272.922	0.185996	17.9308	16.9308	0.0677096	2.43604	1.22868	3.97258
LR_11_NEMTI - 56	inner part			17.3023	0.304932	Below LOD	158							0.44	468600	760	1.48	Below LOD	Below LOD	6.04	0.0101	0.26	1.31	0.278	10.72	4.51	59.9	25.1	125.2	30.38	308	60.4	11450		140	477	0.293501	5.1419	40.9258	0.226796	1327.88	1326.88	0.214809	134.248	133.248	0.103468	3.12283	2.12466	4.6742
LR_11_NEMTI - 58	rim			16.9511	0.334968	Below LOD	216	7.76235	770.519	39.37	755.545	788.802		0.49	474500	1088	2.37	Below LOD	Below LOD	10.62	0.07	1.17	2.65	0.806	15.1	5.71	78.2	34.6	174	43.5	453	93.7	8290		208	465	0.447312	5.79284	57.2376	0.389536	457.901	456.901	0.304801	41.8932	40.8932	0.118718	2.65982	1.61165	3.82235
LR_11_NEMTI - 59	core of 57			19.3106	0.294686	Below LOD	306	4.81196	725.429	36.4151	711.713	742.154		0.556	468300	1149	2.96	0.11	0.09	17	0.103	1.84	3.75	0.761	20.37	7.51	95.4	39	186.4	44	434	84	9810		329	544	0.604779	4.54927	47.737	0.266193	323.038	322.038	0.214873	351.13	350.13	0.224408	2.50791	2.54423	3.72276
LR_11_NEMTI - 60	rim of 61			17.3873	0.254919	Below LOD	180	2.79819	678.802	33.4922	666.328	693.989		0.52	463000	917	3.14	Below LOD	Below LOD	10.76	0.0231	0.73	2.1	0.409	13.34	5.11	68.3	29.67	150.3	38.13	396	80.8	10300		197.7	564.3	0.350346	5.79795	44.9515	0.236243	773.082	772.082	0.19753	621.693	620.693	0.182325	2.88766	2.79288	4.3879
LR_11_NEMTI - 62	rim of 63			17.2188	0.304521	Below LOD	207.1	3.82849	705.219	35.1317	692.048	721.268		0.544	465400	901	2.69	Below LOD	Below LOD	13.81	0.049	1.09	2.69	0.504	16.05	5.81	73.6	30.47	143.2	33.56	325.6	63.8	9990		294.6	515.1	0.571928	4.42391	46.5866	0.234499	450.158	449.158	0.200688	96.8522	95.8522	0.117198	2.6524	1.9816	4.0217
LR_11_NEMTI - 63	core of 62			16.9584	0.293177	Below LOD	172.7	2.52891	670.577	32.9906	658.316	685.501		0.515	478400	774	2.32	0.097	0.0143	11.24	0.03	0.71	1.68	0.433	11.89	4.36	57.6	24.68	123.2	30.9	322.6	64.6	10540		234.8	586	0.400683	5.60069	45.389	0.296187	807.385	806.385	0.239985	126.884	125.884	0.119621	2.90654	2.09997	4.29078
LR_11_NEMTI - 64	rim of 65			16.9943	0.359278	Below LOD	202.2	7.34087	765.046	39.0045	750.228	783.136		Below LOD	459700	668	1.23	Below LOD	Below LOD	8.54	Below LOD	1.03	2.03	Below LOD	12.87	4.45	56.6	23.01	108	25.05	235.8	47.2	8720		125.1	257	0.48677	4.16608	52.7179		283.213	282.213	#VALUE!	189.347	188.347		2.45058	2.27496	#VALUE!
Mátraszele, bentonite quarry
LR_11_MSZ-1 - 26	inner part	disc.		17.2993	0.719469	Below LOD	193	4.46072	718.637	35.981	705.106	735.134		0.53	506000	869	3.17	Below LOD	Below LOD	11.47	0.035	1.04	1.96	0.162	13.67	5.54	72.6	29.6	143.2	34.6	340	60.4	10080		147.9	318	0.465094	4.6832	50.1984	0.0956811	494.368	493.368	0.0715091	301.804	300.804	0.0642688	2.69317	2.47828	3.95836
LR_11_MSZ-1 - 27	inner part			17.8803	0.276647	Below LOD	197	2.03718	653.469	31.9607	641.646	667.853		0.55	487000	1591	7.58	Below LOD	Below LOD	19.7	0.016	0.77	3.01	0.5	22.4	9.44	126.6	54.9	269	67.4	681	130.7	10880		778	1431	0.543676	5.37915	44.761	0.18616	1457.64	1456.64	0.16327	77.0407	76.0407	0.0596849	3.16335	1.88105	4.95152
LR_11_MSZ-1 - 28	inner part			16.9437	0.385627	Below LOD	810	3.81678	704.954	35.115	691.79	720.994		1.28	466500	1800	2.71	0.129	5.4	27.4	1.57	9.3	6.2	0.607	36	12.6	156	62.3	289	64.8	601	116	9600		297	438	0.678082	3.85256	48.5938	0.124212	87.7828	86.7828	0.0766143	112.369	111.369	0.0794527	1.93843	2.04677	2.44557
LR_11_MSZ-1 - 30	rim			17.0726	0.512253	Below LOD	246	5.64322	740.016	37.3572	725.899	757.237		0.67	445000	794	1.42	2.7	0.053	5.59	0.04	0.76	1.42	0.383	11.39	4.43	61.4	26.3	130.3	31.63	328	66.8	8210		91.3	203.2	0.449311	5.34202	54.2022	0.29115	429.771	428.771	0.21292	41.2929	40.2929	0.0882691	2.63223	1.60523	3.70586
LR_11_MSZ-1 - 31	rim			16.9578	0.418786	Below LOD	770	2.90356	681.842	33.6787	669.289	697.127		1.87	449500	791	2.91	0.188	7	26.5	1.79	9.8	3.03	0.331	13	4.83	61.4	26.46	128.2	31.12	310.5	62.3	9460		151.3	311.1	0.486339	5.057	47.5159	0.161235	95.5544	94.5544	0.0765451	4.47538	3.47538	0.0190812	1.97568	0.541002	2.24005
LR_11_MSZ-1 - 32	inner part			17.1784	0.323396	Below LOD	274	3.13772	688.285	34.0758	675.563	703.779		0.94	494300	1819	2.46	0.068	0.68	16.9	0.24	2.99	5.78	0.763	34	12.34	158	62.8	294	67.8	676	123.8	9800		307	493	0.622718	4.27848	50.4388	0.166397	189.173	188.173	0.133861	248.472	247.472	0.155457	2.27456	2.39353	3.31264
LR_11_MSZ-1 - 33	inner part	?young		16.7839	0.227915	Below LOD	667	3.48896	697.242	34.6321	684.284	713.028		0.92	466500	2372	13.7	0.157	1.98	38.2	0.72	5.5	7.3	1.33	45.7	16.53	210.6	82	366.5	81.7	763	139.5	10230		765	1396	0.547994	3.62298	45.6012	0.222616	208.261	207.261	0.163842	708.075	707.075	0.274637	2.31652	2.84947	3.28755
LR_11_MSZ-1 - 34	rim	?young		16.415	0.398448	Below LOD	208	5.78371	742.305	37.5062	728.124	759.605		0.47	457500	762	2.05	Below LOD	0.049	9.72	0.062	0.76	1.94	0.288	12.31	4.67	60.5	25.63	123	29.31	292.7	58.8	8860		159.6	275.2	0.579942	4.83802	51.6366	0.180172	546.182	545.182	0.150149	317.905	316.905	0.126142	2.73654	2.50093	3.64726
LR_11_MSZ-1 - 38	rim			16.963	0.286369	Below LOD	188.5	2.71624	676.37	33.3435	663.96	691.48		0.445	458800	831	3.83	0.069	Below LOD	12.54	0.0307	0.64	1.57	0.186	11.17	4.48	61.3	27.3	141.7	34.62	359.5	72.9	9820		190.2	403	0.47196	5.8646	46.721	0.135788	1185.97	1184.97	0.105092	226.029	225.029	0.0568935	3.07371	2.35224	4.11817
LR_11_MSZ-1 - 43	inner part			17.5474	0.410633	Below LOD	235	11.9655	814.984	42.4079	798.717	834.873		0.52	463200	1391	1.13	Below LOD	Below LOD	15.06	0.335	5.95	9.38	3.54	41.3	12.33	134.8	49.7	213.2	45.5	434	80.5	7740		180	206	0.873786	3.21958	59.845	0.549858	40.3243	39.3243	0.491738	75.3079	74.3079	0.626824	1.59466	1.87103	2.78882
LR_11_MSZ-1 - 45	rim			17.1898	0.207812	Below LOD	371	5.05782	729.945	36.7054	716.105	746.823		0.68	468000	1929	6.98	0.151	0.207	37.5	0.244	3.29	7.29	1.272	43.8	14.79	176.2	67.3	294	63.1	578	106.5	9270		1506	1351	1.11473	3.28036	50.4854	0.217626	268.764	267.764	0.195309	1054.58	1053.58	0.363709	2.42775	3.02267	3.74327
LR_11_MSZ-1 - 47	rim			16.8104	0.290024	Below LOD	256	3.78166	704.154	35.0648	691.012	720.168		0.74	467000	2048	6.59	0.124	0.075	17.72	0.069	1.36	3.52	0.544	26.15	10.42	149.2	66.8	336.6	82.8	835	162.7	9280		398.9	859	0.464377	5.59651	50.3233	0.173347	797.915	796.915	0.135043	139.622	138.622	0.0738644	2.90141	2.14183	4.09514
LR_11_MSZ-1 - 49	inner part			17.9804	0.341206	Below LOD	207.6	7.2472	763.795	38.9213	749.012	781.842		0.529	452800	975	1.5	0.064	0.058	6.43	0.094	1.52	3.1	0.723	20.1	6.63	84.3	34.2	160	36.8	354	69.1	8870		107	262	0.408397	4.19929	51.0485	0.280016	139.459	138.459	0.236439	225.597	224.597	0.29414	2.14132	2.3514	3.44517
LR_11_MSZ-1 - 52	rim	?young		16.7904	0.232787	Below LOD	262	2.59916	672.79	33.1252	660.472	687.785		0.78	464900	1698	12.3	0.079	0.27	23.9	0.075	1.14	2.7	0.215	21.55	8.92	124.1	55.6	283	69.4	717	142.2	9820		314.6	721	0.436338	5.7776	47.3422	0.0861701	1383.9	1382.9	0.0647839	1318.91	1317.91	0.0662805	3.14079	3.11989	3.98287
LR_11_MSZ-1 - 56	inner part			17.1303	0.326245	Below LOD	606	4.06265	710.388	35.4575	697.078	726.608		1.51	464100	1850	2.39	0.141	4.9	21.2	1.44	8.4	7.4	1.06	41	13.2	163	64	293	64.5	602	111	8900		216	367	0.588556	3.69325	52.1461	0.186047	63.9383	62.9383	0.129169	99.5328	98.5328	0.150086	1.79891	1.99358	2.4063
LR_11_MSZ-1 - 57	rim			17.0886	0.295012	Below LOD	342	7.05988	761.254	38.7524	746.543	779.211		0.691	467000	1720	2.26	0.071	Below LOD	13.47	0.188	3.04	6.52	1.47	36.6	12.5	154	59.8	267	58.7	553	101.6	8970		251	457	0.549234	3.59091	52.0624	0.290922	113.523	112.523	0.253572	27.7681	26.7681	0.161078	2.05124	1.42762	3.38576
LR_11_MSZ-1 - 58	rim	?young		16.417	0.341821	Below LOD	302	2.38842	665.993	32.7129	653.851	680.772		0.67	442400	866	2.83	Below LOD	1.24	17.02	0.442	2.88	2.87	0.377	14.86	5.53	71	28.64	137.5	31.92	319.6	63.49	10610		421.6	776	0.543299	4.50141	41.6965	0.176488	205.601	204.601	0.116617	479.503	478.503	0.148791	2.31091	2.67988	3.24444
LR_11_MSZ-1 - 61	rim	disc.		17.1573	0.345289	Below LOD	2020	3.50067	697.527	34.6499	684.562	713.323		4.02	461000	899	3.87	0.39	29.3	74	7.2	30.5	7.6	0.494	17.4	5.7	72.7	30.32	147	35.56	353.6	69.46	9810		226.9	444.9	0.510002	4.86382	46.9929	0.131332	51.9954	50.9954	0.0632885	313.369	312.369	0.0900312	1.70753	2.49467	1.79093
LR_11_MSZ-1 - 62	rim	?young		16.5662	0.20788	Below LOD	473	2.98552	684.144	33.8203	671.531	699.504		0.74	458400	1917	12.01	0.082	Below LOD	23.43	0.087	1.93	4.74	0.786	34	13	165.7	66.9	298.1	65.9	608	109.5	10370		690	1453	0.47488	3.66928	44.2044	0.189286	414.961	413.961	0.159942	103.002	102.002	0.109478	2.61696	2.00861	4.22275
LR_11_MSZ-1 - 63	rim	?young		16.6096	0.271292	Below LOD	209.1	3.88703	706.535	35.2145	693.329	722.628		0.54	457200	841	2.57	Below LOD	Below LOD	12.4	0.047	0.94	2.35	0.446	14.61	5.27	67.9	28.01	132.9	31.82	319	62.3	10320		449	784	0.572704	4.69809	44.3023	0.232702	508.613	507.613	0.198362	30.1867	29.1867	0.0705396	2.70553	1.46518	4.22222
LR_11_MSZ-1 - 64	rim of 65			17.4936	0.197678	Below LOD	598	1.96693	650.751	31.7987	638.997	665.05		0.752	454800	2491	18.68	0.089	Below LOD	32.04	0.057	1.32	4.96	0.87	37.32	15.44	205.4	84.57	391	89.69	855	158.7	11580		417.1	1741	0.239575	4.16261	39.2746	0.195493	1069.14	1068.14	0.175518	889.16	888.16	0.193154	3.02863	2.94849	4.48492
LR_11_MSZ-1 - 65	rim of 64			17.3933	0.34465	Below LOD	455	5.88908	743.992	37.6163	729.765	761.35		0.72	464500	1670	2.88	Below LOD	Below LOD	12.34	0.16	3.22	6	1.69	35.1	12	146	56.5	251	57.5	548	102.4	8750		223	494	0.451417	3.75342	53.0857	0.356026	103.644	102.644	0.298468	278.275	277.275	0.455496	2.01133	2.44291	3.48961
LR_11_MSZ-1 - 3	inner part			17.6159	0.354099	Below LOD	569	2.50659	669.863	32.9473	657.621	684.764		0.73	467000	2273	4.54	Below LOD	Below LOD	17.9	0.144	3.05	7.19	1.157	44	16.21	201.8	78.7	357	77.6	732	129.4	10550		334	835	0.4	3.62735	44.2654	0.198869	169.386	168.386	0.171427	72.2148	71.2148	0.140618	2.22631	1.85257	3.76332
LR_11_MSZ-1 - 5	inner part			17.4066	0.44956	Below LOD	176	5.5061	737.737	37.2091	723.682	754.88		0.285	440900	621	1.66	Below LOD	Below LOD	8.13	0.0336	0.522	1.62	0.284	9.27	3.72	48.8	21.01	100.4	23.36	232.6	46.1	8800		101.8	195.7	0.520184	4.76639	50.1023	0.22405	654.925	653.925	0.192508	525.885	524.885	0.187291	2.81553	2.72006	3.76525
LR_11_MSZ-1 - 7	inner part			17.2597	0.32857	Below LOD	255	3.81756	704.972	35.1161	691.808	721.013		0.67	415100	2350	2.1	Below LOD	0.034	18.5	0.421	7.2	12.8	2.32	59.8	19.6	220	82.9	355	75	668	121.3	8730		455	547	0.83181	3.03636	47.5487	0.256363	45.09	44.09	0.226089	98.7414	97.7414	0.326308	1.64434	1.99008	3.11371
LR_11_MSZ-1 - 8	rim			17.6915	0.475216	Below LOD	115	3.18829	689.624	34.1586	676.867	705.162		0.46	461000	744	3.01	Below LOD	Below LOD	12.27	0.034	0.66	2.07	0.5	11.21	4.3	59.7	25.43	124.7	31.2	317.8	60	8630		123.1	259	0.47529	5.32328	53.4183	0.317326	832.636	831.636	0.272664	476.649	475.649	0.230806	2.91993	2.67729	3.88182
LR_11_MSZ-1 - 10	inner part			18.1528	0.56962	Below LOD	278	4.55171	720.438	36.0958	706.857	736.994		0.48	473000	810	1.58	Below LOD	Below LOD	6.96	0.036	0.69	2.01	0.309	12.11	4.87	64.4	27.64	132.1	31.3	322	60.6	8940		87.8	197	0.445685	5	52.9083	0.191475	448.077	447.077	0.160721	85.2984	84.2984	0.0916297	2.65038	1.92582	3.73816
LR_11_MSZ-1 - 11	inner part	disc.		20.7408	1.15058	Below LOD	470	9.33415	789.014	40.6186	773.508	807.957		0.59	417000	1530	0.68	Below LOD	Below LOD	3.67	0.167	2.6	6.5	0.778	34.3	12.4	148	55.2	246	51.3	450	84.9	8630		113	192	0.588542	3.04054	48.3198	0.159294	31.1912	30.1912	0.145121	29.443	28.443	0.15937	1.47988	1.45398	3.06058
LR_11_MSZ-1 - 14	inner part			17.7759	0.445664	Below LOD	264	2.61146	673.172	33.1485	660.845	688.179		0.68	468200	974	2.53	Below LOD	3.3	18.5	1	5.2	2.94	0.277	15.8	6.19	81.1	33.6	161.4	38.1	374	69.1	10320		111.5	257	0.433852	4.61159	45.3682	0.124251	136.112	135.112	0.067985	373.763	372.763	0.0914598	2.13069	2.57143	2.40993
LR_11_MSZ-1 - 15	inner part			17.9492	0.48999	Below LOD	132.9	2.78976	678.554	33.4771	666.087	693.733		0.412	438800	685	1.87	Below LOD	Below LOD	8.16	0.0253	0.49	1.37	0.197	9.52	3.65	51.9	22.37	113	26.8	275	54.8	9750		84.9	189.5	0.448021	5.29865	45.0051	0.166767	897.528	896.528	0.13648	312.701	311.701	0.0957161	2.95256	2.49374	3.87449
LR_11_MSZ-1 - 18	rim			18.0126	1.13919	Below LOD	162	4.04829	710.078	35.4379	696.777	726.288		0.44	476000	751	2.85	Below LOD	Below LOD	10.7	0.04	0.53	1.41	0.32	10.9	4.36	59.37	24.8	126.8	31.1	317.5	58.2	9950		144.6	300	0.482	5.34782	47.8392	0.249546	1118.61	1117.61	0.200526	284.844	283.844	0.130487	3.04829	2.45308	3.87506
LR_11_MSZ-1 - 19	inner part			17.6744	0.521569	Below LOD	381	8.91463	784.341	40.301	768.97	803.115		1	454400	1900	1.84	0.128	0.73	20.6	0.65	8.1	10.1	2.74	47.1	15.7	183	67	283	60.6	549	97	8420		242	381	0.635171	3	53.9667	0.384064	45.7078	44.7078	0.303689	342.844	341.844	0.680886	1.65038	2.53383	2.76801
LR_11_MSZ-1 - 20	rim			18.0762	0.336207	Below LOD	502	3.54488	698.598	34.7167	685.604	714.429		1.17	435600	906	3.03	Below LOD	5.4	22.3	1.44	6.9	2.65	0.35	12.73	5.02	68.9	29.76	149	35.8	371	75.4	9000		129.9	293	0.443345	5.38462	48.4	0.184228	145.764	144.764	0.0880065	19.285	18.285	0.0332367	2.16066	1.26209	2.30851
LR_11_MSZ-1 - 21	inner part			17.2832	0.403539	Below LOD	237	3.34561	693.68	34.4103	680.817	709.35		0.622	436300	1337	1.89	Below LOD	0.055	11.64	0.092	1.59	3.67	0.516	24.2	8.64	110.5	46.4	217.4	49.7	484	92.3	9340		182.9	312	0.586218	4.38009	46.7131	0.167391	270.11	269.11	0.140519	71.7053	70.7053	0.0908071	2.42993	1.84945	3.53037
LR_11_MSZ-1 - 22	inner part			17.6487	0.423332	Below LOD	274	7.61415	768.623	39.2431	753.703	786.839		0.365	436600	1082	2.1	0.073	Below LOD	7.6	0.042	1.08	3.33	0.666	20.01	7.54	94.8	38.2	177.3	38.11	354.8	65.3	8600		163	339	0.480826	3.74262	50.7674	0.249432	217.676	216.676	0.227097	167.979	166.979	0.235644	2.33581	2.22266	3.90695
LR_11_MSZ-1 - 24	rim			18.0003	0.226644	Below LOD	368	3.41902	695.52	34.5247	682.607	711.25		0.8	434200	942	3.07	0.13	2.41	19	0.52	2.76	2.08	0.469	12.97	4.84	68.2	30.4	154.8	39	426	90	9780		457	747	0.61178	6.24633	44.3967	0.276054	402.218	401.218	0.157751	202.575	201.575	0.103174	2.60338	2.30444	3.15732
Szilvásvárad
LR_16_SZIV - 3	rim			14.4937	0.21098	Below LOD	353	0.761015	582.807	27.8974	572.709	595.066		0.81	459800	1910	8.75	0.078	Below LOD	12.44	0.0285	0.95	3.39	0.306	28.8	12.1	162	68.5	319	70.6	651	118.5	11490		273	814	0.335381	4.01852	40.0174	0.094678	614.553	613.553	0.0826404	261.066	260.066	0.0732954	2.78785	2.41508	4.45578
LR_16_SZIV - 4	rim			14.8744	0.222572	Below LOD	444							0.79	453400	1985	7.17	Below LOD	0.36	10.73	0.16	1.43	3.49	0.317	30.2	12.31	170.6	70.8	330	72.9	693	129	11850		211	676	0.31213	4.06213	38.2616	0.0943989	363.417	362.417	0.0745034	155.719	154.719	0.0626468	2.55921	2.18954	3.62583
LR_16_SZIV - 6	rim			14.5347	0.210261	Below LOD	446	1.7679	642.584	31.3147	631.036	656.63		0.92	452900	2290	16	0.082	0.052	13.16	0.052	0.74	3.12	0.277	28.6	12.99	182.8	80.3	381	87.1	847	157.1	11570		286	926	0.308855	4.63348	39.1443	0.0896485	1110.1	1109.1	0.0771067	2113.11	2112.11	0.120219	3.04497	3.32472	4.25061
LR_16_SZIV - 7	rim	?young		13.7499	0.240497	Below LOD	415	2.6577	674.596	33.2352	662.232	689.649		0.68	445400	1884	10.35	0.079	0.47	24	0.238	2.24	4.57	0.579	31.4	12.43	164.6	68.7	313.2	70.2	665	123	10320		412	805	0.511801	4.0401	43.1589	0.147768	422.283	421.283	0.114627	771.434	770.434	0.159223	2.62457	2.88674	3.52922
LR_16_SZIV - 8	inner part			14.7654	0.233371	Below LOD	368	3.88703	706.535	35.2145	693.329	722.628		0.73	449400	2023	10.43	Below LOD	0.23	21.8	0.182	2.05	4.59	0.77	33.7	12.92	175	72.8	337.4	75.7	719	133.1	9400		272	557.9	0.487543	4.10857	47.8085	0.189275	439.689	438.689	0.151052	485.243	484.243	0.175447	2.64216	2.68506	3.48648
LR_16_SZIV - 11	rim			14.5769	0.229375	Below LOD	377	1.75619	642.081	31.285	630.545	656.11		0.73	446000	1704	8.48	0.087	0.0079	12.52	0.0303	0.83	3.31	0.316	26	10.95	147.6	62.4	281.9	62.3	589	105.4	11320		422	1029	0.410107	3.99051	39.3993	0.104138	667.776	666.776	0.093982	104.953	103.953	0.0575343	2.82398	2.01684	4.53097
LR_16_SZIV - 13	rim			14.7087	0.280347	Below LOD	395	2.72795	676.721	33.365	664.302	691.842		0.69	467600	1840	8.23	Below LOD	Below LOD	19.09	0.066	1.18	3.86	0.52	32.1	12.38	163.3	66.8	303.2	65.6	622	111.8	10450		331.7	703.8	0.471299	3.80894	44.7464	0.142817	643.909	642.909	0.127806	169.494	168.494	0.0932751	2.80815	2.22658	4.02791
LR_16_SZIV - 14	inner part			14.5035	0.253255	Below LOD	280	2.34158	664.416	32.6176	652.314	679.144		0.63	465000	2174	2.57	0.063	Below LOD	12.45	0.116	3.07	7.84	1.09	48.9	17.41	209	81.1	350	75	677	117.7	9850		238.5	483	0.493789	3.23923	47.2081	0.170191	99.9161	98.9161	0.154963	11.004	10.004	0.0791238	1.99527	1.00017	3.61949
LR_16_SZIV - 15	rim	old		355.062	13.9857	Below LOD	323.7	3.87532	706.273	35.198	693.074	722.357		0.581	450900	1300	4.33	Below LOD	Below LOD	10.9	0.0315	1.05	3.22	0.237	22.7	8.49	114.9	46	211.8	47.6	453	82.4	10740		164	569	0.288225	3.94256	41.9832	0.0847483	388.859	387.859	0.0752101	269.972	268.972	0.0757582	2.58867	2.42971	4.2568
LR_16_SZIV - 17	rim			14.6338	0.231378	Below LOD	770	3.75824	703.618	35.0311	690.49	719.614		1.33	455500	2037	11.54	0.105	3.2	26.1	1.28	7.5	5.37	0.592	31.96	12.63	171.5	72.4	340.7	77.6	754	139.3	10140		308.8	726	0.425344	4.3965	44.9211	0.138151	141.219	140.219	0.079479	357.713	356.713	0.109149	2.14681	2.55232	2.75373
LR_16_SZIV - 18	inner part			15.0497	0.261592	Below LOD	723	18.9668	866.679	46.0951	848.843	888.522		0.92	453800	2070	5.07	0.067	0.53	13.7	0.38	3.17	5.81	0.7	39.4	14.69	188	76.3	351	77	726	134	9750		271	690	0.392754	3.8617	46.5436	0.141444	149.013	148.013	0.110828	267.06	266.06	0.151057	2.1703	2.42498	3.25907
LR_16_SZIV - 19	rim			14.5303	0.375038	Below LOD	211	1.86156	646.518	31.5473	634.871	660.685		0.52	461400	1592	2.08	0.061	Below LOD	13.08	0.089	1.73	5.28	0.902	34.7	12.36	153.1	59.02	259	57.87	527	95.6	10390		163.9	333.6	0.491307	3.44219	44.4081	0.203727	211.438	210.438	0.191976	374.636	373.636	0.277739	2.32312	2.57245	3.57384
LR_16_SZIV - 20	rim			14.4108	0.457148	Below LOD	229	6.11153	747.475	37.844	733.15	764.953		0.55	439100	1321	3.03	Below LOD	0.0088	10.07	0.102	2.21	4.36	1.05	30	10.76	128.1	49.3	212	45.2	410	75.5	7615		228	301	0.757475	3.20062	57.6625	0.280678	119.62	118.62	0.237572	229.982	228.982	0.343684	2.07416	2.3598	3.46997
LR_16_SZIV - 22	rim			14.1626	0.250339	Below LOD	505	2.09572	655.675	32.0925	643.797	670.128		0.8	431300	2000	10.03	Below LOD	0.21	16.24	0.163	1.76	4.02	0.464	32.3	12.93	177.8	73.1	332.2	74.2	693	125.8	10260		349	870	0.401149	3.89764	42.037	0.124488	400.185	399.185	0.0980728	666.493	665.493	0.138009	2.60117	2.82314	3.72733
LR_16_SZIV - 25	inner part			14.389	0.325111	Below LOD	290	2.5172	670.203	32.9679	657.952	685.115		0.67	457300	1960	2.93	Below LOD	0.025	8.92	0.166	3.2	6.9	1.31	44	15	182	71.2	312	68.5	643	115	9150		164	341	0.480938	3.53297	49.9781	0.22985	73.626	72.626	0.201129	85.3203	84.3203	0.237491	1.86109	1.92593	3.31265
LR_16_SZIV - 26	inner part			14.4946	0.365675	Below LOD	298	6.18178	748.553	37.9147	734.199	766.068		0.79	446700	1460	4.46	0.069	0.41	10.99	0.197	2.07	3.94	0.848	25.94	9.93	128.5	52.6	244.8	53.9	512	94.2	8070		173	316	0.547468	3.98444	55.3532	0.25644	191.269	190.269	0.199784	229.496	228.496	0.233833	2.27937	2.35888	3.20522
LR_16_SZIV - 27	rim of 28			14.8672	0.284382	Below LOD	354							0.67	451800	1110	5.49	Below LOD	Below LOD	6.1	0.0163	0.361	1.38	0.137	13.43	6.16	89.6	38.8	187.9	44.3	432	82.5	11230		114	448	0.254464	4.82143	40.2315	0.0972897	1190.44	1189.44	0.0800591	444.712	443.712	0.0658294	3.07534	2.6471	4.43909
LR_16_SZIV - 28	rim of 27			14.174	0.199638	Below LOD	386	2.77478	678.113	33.4501	665.657	693.278		0.834	455100	1847	10.48	Below LOD	Below LOD	16.66	0.045	1.14	3.97	0.566	32.49	12.78	163.9	67	301.1	64.8	606	109.2	10800		544	989	0.550051	3.69738	42.1389	0.15236	556.191	555.191	0.139103	73.8211	72.8211	0.0792065	2.74444	1.86226	4.34198
LR_16_SZIV - 31	rim			14.2512	0.239117	Below LOD	413	2.10743	656.11	32.1185	644.221	670.577		0.64	469000	1873	9.04	Below LOD	Below LOD	21.51	0.081	1.67	4.48	0.569	35.5	13.03	170.4	67	299	66.5	623	113.4	10490		557	950	0.586316	3.6561	44.7092	0.137938	457.816	456.816	0.120604	1056.91	1055.91	0.19324	2.65974	3.02363	4.06924
LR_16_SZIV - 32	rim			14.2636	0.259344	Below LOD	523	3.11431	687.659	34.0371	674.954	703.133		1.02	466300	2580	13.32	0.118	1.21	24	0.56	4	5.69	0.763	42.4	16.43	222.1	91	422.1	94.2	897	157.8	10470		371.7	902	0.412084	4.03872	44.5368	0.150179	244.128	243.128	0.105691	852.222	851.222	0.186611	2.38584	2.93004	3.20702
LR_16_SZIV - 33	rim			14.4169	0.20217	Below LOD	450	2.70453	676.018	33.322	663.617	691.116		0.77	454700	1683	7.53	0.089	0.63	14.2	0.4	2.99	3.89	0.534	28.57	11.28	150	60.8	275.3	60.5	575	103.3	10420		296	701	0.422254	3.83333	43.6372	0.154858	183.722	182.722	0.106719	171.652	170.652	0.11307	2.26179	2.23211	3.24366
LR_16_SZIV - 34	rim	disc.		14.7941	0.28164	Below LOD	1472	1.58057	634.164	30.8201	622.826	647.951		2.13	460000	1285	7.17	0.219	10.2	35.9	3.68	19.1	6.77	0.429	25	8.59	112.3	46.5	216.1	48.7	458	82.3	11650		224.4	629	0.356757	4.07836	39.485	0.100813	46.7419	45.7419	0.0521422	261.489	260.489	0.08638	1.66031	2.41579	2.2328
LR_16_SZIV - 35	rim			14.5262	0.264749	Below LOD	289	5.26856	733.676	36.9461	719.733	750.68		0.57	459700	1146	3.9	Below LOD	0.095	17.06	0.092	1.51	3.39	0.593	22.84	8.18	103.2	41.5	186.7	40.2	378	69.6	9010		255	394	0.647208	3.66279	51.0211	0.20603	350.629	349.629	0.17522	13.9861	12.9861	0.058002	2.54361	1.11348	3.63171
LR_16_SZIV - 36	rim			14.3432	0.218631	Below LOD	454	1.4752	629.055	30.5221	617.843	642.685		0.776	450300	2019	11.74	0.102	Below LOD	17.04	0.056	0.98	3.63	0.341	31.77	13.07	177.2	73.1	334.9	73.5	689	123.4	11220		526	1171	0.449189	3.88826	40.1337	0.0970769	788.993	787.993	0.0865393	778.28	777.28	0.106885	2.89652	2.89058	4.32037
LR_16_SZIV - 37	rim			14.8127	0.281587	Below LOD	357	2.38842	665.993	32.7129	653.851	680.772		0.78	448100	1527	10.2	0.107	0.07	14.11	0.067	1.1	3.18	0.311	26.1	10.42	138.1	56.6	261	58.7	552	98.9	10640		279	685	0.407299	3.9971	42.1147	0.104364	549.242	548.242	0.0885442	284.758	283.758	0.0821322	2.73897	2.45295	4.00962
LR_16_SZIV - 39	rim			14.1279	0.223252	Below LOD	354	48.0025	987.391	55.3572	965.613	1014.16		0.78	442200	1944	12.16	0.09	Below LOD	18.1	0.054	1.18	3.52	0.582	27.4	11.28	161.3	69	328	75.7	728	139.2	9710		201.1	584.8	0.343878	4.51333	45.5407	0.181176	808.897	807.897	0.147942	1545.12	1544.12	0.214434	2.90736	3.18868	4.03461
LR_16_SZIV - 40	rim of 42			14.2843	0.230904	Below LOD	330	3.09089	687.029	33.9982	674.34	702.482		0.611	467000	1580	9.27	0.063	Below LOD	14.44	0.055	1.09	3.2	0.33	24.62	10.16	139.2	57.8	262.1	59.6	560	98.4	10610		305.4	707	0.431966	4.02299	44.0151	0.113663	580.695	579.695	0.0947806	889.531	888.531	0.133338	2.7632	2.94867	4.10906
LR_16_SZIV - 41	rim			14.4564	0.188103	Below LOD	519	1.29958	619.815	29.9872	608.831	633.166		1.02	458000	2654	15.79	Below LOD	0.026	17.45	0.0437	0.91	4.17	0.306	39.3	16.43	226.6	94.5	429.3	94.3	891	161.1	11780		510.5	1442	0.354022	3.93204	38.8795	0.073077	944.644	943.644	0.0680638	1189.48	1188.48	0.0945528	2.97481	3.07499	4.51848
LR_16_SZIV - 44	rim			14.7709	0.213284	Below LOD	349	2.2128	659.938	32.348	647.951	674.525		0.81	454400	1967	11.65	Below LOD	0.25	12.53	0.15	1.01	3.37	0.475	28.1	11.81	164.5	70.1	334	76.8	734	137.9	10900		194.7	634	0.307098	4.46201	41.6881	0.149228	662.85	661.85	0.125457	433.23	432.23	0.125063	2.82076	2.63571	3.626
LR_16_SZIV - 45	rim			14.2925	0.230173	Below LOD	397	1.83814	645.55	31.49	633.928	659.688		0.55	454700	1540	8	Below LOD	0.077	10.61	0.072	0.95	2.71	0.292	23.9	9.61	133.7	55.77	258.9	57	539	97.7	11430		327.9	887	0.369673	4.03141	39.7813	0.110923	533.679	532.679	0.0917469	589.878	588.878	0.113999	2.72647	2.77003	4.09059
LR_16_SZIV - 46	rim of 47			13.9693	0.215888	Below LOD	506	2.34158	664.416	32.6176	652.314	679.144		1.13	477000	2960	20.72	0.09	0.03	22.9	0.057	1.59	5.28	0.45	48.1	18.73	257.6	104.7	471	104.4	984	168.1	11610		826	1708	0.483607	3.81988	41.0853	0.086327	623.471	622.471	0.0762599	435.914	434.914	0.0835855	2.79412	2.6384	4.47661
LR_16_SZIV - 47	rim of 46			14.0392	0.205894	Below LOD	740	2.24792	661.18	32.4227	649.161	675.806		1.15	468000	2728	19.34	0.112	2.2	29.9	1	5.4	6.5	0.59	47.1	19.36	246.2	98.2	430.9	94.8	869	153.4	11150		1110	1823	0.608886	3.52965	41.9731	0.103088	194.755	193.755	0.0698999	766.93	765.93	0.129859	2.28725	2.88419	3.26079
LR_16_SZIV - 48	rim			14.3672	0.22635	Below LOD	515	1.26446	617.843	29.8737	606.907	631.134		0.81	468500	2560	14.98	0.095	Below LOD	16.8	0.032	1.06	4.41	0.32	39.2	16.19	220.4	91.3	414.7	90.7	851	147.8	12080		683	1599	0.427142	3.86116	38.7831	0.0744066	716.956	715.956	0.0683216	1821.49	1820.49	0.124339	2.85489	3.26019	4.6987
LR_16_SZIV - 49	rim of 50			14.7376	0.209598	Below LOD	402	2.15426	657.831	32.2215	645.897	672.351		0.765	454100	1956	11.87	0.061	Below LOD	13.89	0.0313	0.81	3.41	0.281	29.8	12.4	169.9	69.3	322.9	71.2	669	122	11090		403	1028	0.392023	3.93761	40.9468	0.0852206	805.931	804.931	0.0780856	847.15	846.15	0.0989592	2.90576	2.92745	4.51645
LR_16_SZIV - 51	core of 53			14.1963	0.243629	Below LOD	430	2.71624	676.37	33.3435	663.96	691.48		0.77	456500	2085	3.47	Below LOD	Below LOD	10.35	0.127	2.77	6.39	1.02	41.6	15.58	192.2	78.8	339.6	74.2	683	122.6	9690		223	491	0.454175	3.55359	47.1104	0.191261	111.665	110.665	0.162431	609.689	608.689	0.353442	2.04401	2.7844	3.58728
LR_16_SZIV - 53	rim of 51			14.2429	0.261254	Below LOD	297	2.98552	684.144	33.8203	671.531	699.504		0.6	456600	1636	7.24	0.066	Below LOD	14.72	0.043	1.35	3.63	0.551	30.71	11.36	149.7	59.33	270.3	57.7	544	98	10560		350	704	0.497159	3.63393	43.2386	0.159545	405.305	404.305	0.138394	289.179	288.179	0.144861	2.60671	2.45966	4.2141
LR_16_SZIV - 55	inner part			14.767	0.263459	Below LOD	3460	6.2052	748.91	37.9381	734.546	766.438		3.73	439000	1713	7.09	0.54	13	52.6	5.17	27.5	11.3	1.09	40.3	13.24	160.8	63.3	275.6	59.7	566	103.7	9070		349	590	0.591525	3.5199	48.4013	0.156156	36.1709	35.1709	0.0892871	154.309	153.309	0.134766	1.54618	2.18557	2.05736
LR_16_SZIV - 56	rim			14.0898	0.247964	Below LOD	473	2.54062	670.949	33.0132	658.679	685.885		0.69	446000	2217	12.28	0.093	Below LOD	23.64	0.061	1.32	5.21	0.673	40.6	15.64	204.4	81.4	361	77.7	713	130.3	10120		855	1286	0.664852	3.48826	44.0711	0.141468	631.868	630.868	0.135243	781.103	780.103	0.180428	2.79994	2.89215	4.32391
LR_16_SZIV - 60	core of 59	old		498.229	6.54196	Below LOD	292	11.5908	811.587	42.1714	795.42	831.351		0.3	446800	1562	2.74	0.11	0.028	9.17	0.139	2.68	5.1	1.57	28.8	10.1	131.4	55.1	257.4	55.1	523	102	6710		81.3	254.3	0.319701	3.98021	66.5872	0.396043	108.301	107.301	0.319216	223.223	222.223	0.436633	2.0306	2.34679	3.26233
Ipolytarnóc
IT-BOR1 - 1	rim			18.0401	0.414887	Below LOD	131	3.10439	687.393	34.0206	674.695	702.858		0.32	456400	645	1.68	Below LOD	0.034	7.56	0.022	0.424	1.11	0.27	7.51	3.26	45	20.47	108.1	27.95	302.1	66.8	9680		168.9	391	0.431969	6.71333	47.1488	0.285895	1309.18	1308.18	0.215543	567.201	566.201	0.149547	3.11667	2.75297	4.24975
IT-BOR1 - 2	rim			17.7679	0.290219	Below LOD	165.4	3.03098	685.399	33.8976	672.753	700.799		0.342	454500	871	2.68	Below LOD	Below LOD	11.64	0.0338	0.559	1.53	0.324	10.64	4.3	59.5	27.9	145.4	38.2	417	89	9700		260	540	0.481481	7.0084	46.8557	0.2455	1503.72	1502.72	0.191422	63.4431	62.4431	0.0556846	3.17688	1.79548	4.20348
IT-BOR1 - 4	rim			17.4533	0.344032	Below LOD	231	3.87	706.154	35.1905	692.958	722.234		0.67	444600	1239	3.66	Below LOD	Below LOD	17.1	0.044	0.81	2.7	0.642	18.6	7.41	97.6	41.77	205.3	49.5	502	102.5	9480		754	1014	0.74359	5.14344	46.8987	0.276962	1060.03	1059.03	0.240443	74.582	73.582	0.0928921	3.02491	1.86677	4.36259
IT-BOR1 - 8	rim			17.5322	0.396887	Below LOD	328	5.11805	731.024	36.7749	717.155	747.939		0.43	453000	1229	2.43	Below LOD	0.047	13.65	0.083	1.32	3.6	0.678	25	8.87	111.3	43.6	200.7	44	419	79.4	9870		142.9	287.3	0.497389	3.7646	45.8967	0.21849	331.164	330.164	0.196995	355.563	354.563	0.226051	2.51873	2.54969	3.53926
IT-BOR1 - 9	rim			17.5108	0.304602	Below LOD	181	1.74098	641.422	31.2462	629.903	655.431		0.69	464900	1207	4.42	Below LOD	Below LOD	13.47	0.043	0.65	1.59	0.374	14.57	5.97	86	39.2	207	53.7	572	118.6	10490		347	858	0.404429	6.65116	44.3184	0.237556	1745.96	1744.96	0.176111	813.269	812.269	0.133534	3.24179	2.9097	4.30002
IT-BOR1 - 10	rim			17.3706	0.209668	Below LOD	232	5.05512	729.897	36.7022	716.058	746.773		0.67	462100	1600	2.75	Below LOD	0.029	15	0.159	2.4	4.4	1.48	26.5	9.93	127.4	53.5	262	63.8	658	131.5	8450		444	588	0.755102	5.16484	54.6864	0.419021	267.89	266.89	0.320642	424.553	423.553	0.37209	2.42633	2.62691	3.56798
IT-BOR1 - 12	rim			17.6146	0.252251	Below LOD	226.1	2.54854	671.2	33.0285	658.924	686.144		0.746	464400	1330	5.33	Below LOD	Below LOD	17.47	0.0385	0.627	2.28	0.451	16.65	7.03	97.7	44.1	223	56.9	593	120.5	10600		654	1173	0.557545	6.0696	43.8113	0.223782	1859.77	1858.77	0.187741	766.157	765.157	0.141283	3.26922	2.88375	4.48384
IT-BOR1 - 13	rim			17.8317	0.297333	Below LOD	260.4	2.12902	656.908	32.1662	644.998	671.399		0.545	457600	1182	6.26	Below LOD	Below LOD	11.27	0.0213	0.502	2.43	0.427	19.45	8.02	105.2	42.65	199.2	44.4	406	74.5	11150		263.7	707	0.372984	3.85932	41.0404	0.189884	942.886	941.886	0.184381	726.511	725.511	0.20867	2.974	2.86064	4.52104
IT-BOR1 - 14	rim			17.4498	0.290999	Below LOD	228.3	3.66024	701.342	34.8884	688.275	717.264		0.69	466000	1169	4.19	Below LOD	Below LOD	22.16	0.047	1.06	2.57	0.607	17.79	6.86	89.4	38.57	189.3	47.5	495.5	103.4	9710		1154	1290	0.894574	5.54251	47.9918	0.274447	1088.76	1087.76	0.22055	382.383	381.383	0.14696	3.03653	2.58136	4.43849
IT-BOR1 - 19	rim			17.2019	0.258116	Below LOD	157.5	2.67439	675.106	33.2663	662.728	690.174		0.491	453900	994	3.62	Below LOD	Below LOD	12.08	0.0175	0.58	1.57	0.315	11.6	4.76	69.8	31.7	166.9	43.6	469	100.4	9960		306	666	0.459459	6.7192	45.5723	0.22566	1610.31	1609.31	0.172193	611.465	610.465	0.116696	3.20664	2.78566	4.58044
IT-BOR1 - 20	rim			17.7181	0.447756	Below LOD	121.6	3.58683	699.605	34.7796	686.584	715.469		0.441	470000	930	0.66	Below LOD	0.0169	3	0.121	2.17	3.99	0.73	20.5	6.57	82	31.8	151	35.6	346	66.4	8880		126	226	0.557522	4.21951	52.9279	0.246765	37.9606	36.9606	0.208381	109.917	108.917	0.309472	1.56774	2.0371	3.27132
IT-BOR1 - 22	rim			17.4145	0.256898	Below LOD	273	2.89463	681.588	33.6631	669.042	696.865		0.68	467400	1529	1.94	Below LOD	Below LOD	10.83	0.109	2.07	4.54	0.927	27.1	10.08	126.2	52.3	251	59.4	595	118.3	9804		360	677	0.531758	4.71474	47.6744	0.2555	199.293	198.293	0.209153	370.903	369.903	0.267513	2.29731	2.56809	3.79316
IT-BOR1 - 24	rim			16.9857	0.250881	Below LOD	238	4.62512	721.869	36.1872	708.249	738.474		0.59	476000	1219	3.64	Below LOD	Below LOD	19.83	0.07	1.24	2.25	0.676	18.41	7.17	95.2	39.8	196.5	49.2	511	103.5	9600		1117	1176	0.94983	5.36765	49.5833	0.321109	903.765	902.765	0.236225	1459.56	1458.56	0.283128	2.95557	3.16392	4.22531
IT-BOR1 - 25	rim of 26			17.4723	0.283503	Below LOD	145.3	3.47146	696.814	34.6053	683.867	712.586		0.42	473000	691	1.61	0.085	0.087	9.28	0.044	0.567	1.3	0.333	8.45	3.511	48	22.1	117	30.59	341.2	73.1	10070		189	401.3	0.470969	7.10833	46.9712	0.307162	1162.27	1161.27	0.227112	138.021	137.021	0.0945545	3.06493	2.13679	3.96002
IT-BOR1 - 26	rim of 25			17.6282	0.375947	Below LOD	133	2.47512	668.848	32.8857	656.632	683.717		0.49	457900	459	1.03	0.125	Below LOD	6.91	Below LOD	0.367	0.83	0.217	6.25	2.26	31.65	14.41	76.7	20.11	219	48.3	10090		141.4	315	0.448889	6.91943	45.3816	0.291276	1311.79	1310.79	0.224514	523.335	522.335	0.147564	3.11753	2.71795	#VALUE!
IT-BOR1 - 27	rim			18.0551	0.410056	Below LOD	150	4.01683	709.396	35.3948	696.113	725.584		0.51	479000	758	2.06	Below LOD	Below LOD	10.7	0.0288	0.59	1.6	0.321	10.1	4.15	55.7	24.9	128.5	33.6	363	76.3	10070		235	465	0.505376	6.51706	47.567	0.244123	1130	1129	0.192957	614.96	613.96	0.14799	3.05269	2.78814	4.20806
IT-BOR1 - 28	rim			17.2689	0.248519	Below LOD	440	3.46098	696.556	34.5893	683.616	712.32		1.13	480700	1420	4.92	0.251	3.6	33.4	0.81	4.2	4.11	0.865	24.09	8.74	114.9	47.1	228.9	57	592	119.1	9930		1481	1594	0.929109	5.15231	48.4089	0.265767	334.973	333.973	0.172822	456.513	455.513	0.175618	2.52371	2.6585	3.294
IT-BOR1 - 30	rim			16.8592	0.284815	Below LOD	773	3.75463	703.535	35.0259	690.409	719.529		1.47	463000	1128	3.47	0.112	3.68	22.6	0.96	3.93	2.64	0.529	16.2	6.45	86.4	37.4	186.8	46.8	478	98.2	9780		554	814	0.68059	5.53241	47.3415	0.247298	300.04	299.04	0.136889	587.625	586.625	0.154437	2.47573	2.76836	2.92835
IT-BOR1 - 31	rim of 32			17.9314	0.368759	Below LOD	211	1.61512	635.778	30.9146	624.4	649.614		0.52	448400	1085	2.19	Below LOD	Below LOD	9.94	0.065	1.01	2.65	0.557	16.4	6.43	84.2	35.9	180.8	44.8	461	99	9690		338	655	0.516031	5.47506	46.2745	0.258306	491.931	490.931	0.211229	399.472	398.472	0.190761	2.69102	2.6004	4.00333
IT-BOR1 - 35	rim			17.811	0.381025	Below LOD	221	3.15683	688.793	34.1072	676.058	704.304		0.5	499000	1161	3.73	Below LOD	Below LOD	16.65	0.043	0.84	2.63	0.611	18.19	7.23	93	39.29	189.5	45.6	468	92.5	10390		853	1250	0.6824	5.03226	48.0269	0.270066	936.348	935.348	0.233294	505.245	504.245	0.196274	2.97097	2.70264	4.46344
IT-BOR1 - 36	rim			17.5565	0.203066	Below LOD	238	2.27585	662.157	32.4814	650.113	676.814		0.66	467900	1507	5.72	Below LOD	Below LOD	18.89	0.04	0.967	2.66	0.551	20.1	8.44	116.6	51	251	60.9	612	125.2	10180		714	1181	0.604572	5.24871	45.9627	0.230376	1163.51	1162.51	0.181952		-1		3.0654	#NUM!	4.47019
IT-BOR1 - 37	rim			17.0581	0.212403	Below LOD	293	4.52024	719.819	36.0563	706.255	736.354		0.56	472900	1448	4.93	Below LOD	Below LOD	21.36	0.065	1.56	3.47	0.713	26.61	10.17	130.7	52.01	236	52.08	494.8	93.5	9380		1162	1127	1.03106	3.78577	50.4158	0.226843	509.429	508.429	0.185622	85.1921	84.1921	0.105598	2.70623	1.92527	4.23901
IT-BOR1 - 38	rim			17.8392	0.276841	Below LOD	193.3	2.86317	680.687	33.6078	668.165	695.936		0.45	466000	794	2.56	Below LOD	Below LOD	12.17	0.048	0.8	1.45	0.417	11.34	4.4	59	26.17	129.5	32.58	342	72.7	9930		555	730	0.760274	5.79661	46.9285	0.31439	926.321	925.321	0.228301	482.329	481.329	0.172131	2.96629	2.68244	4.18208
IT-BOR1 - 39	rim of 40			17.7751	0.38847	Below LOD	317.6	1.92976	649.28	31.7112	637.563	663.533		0.442	484000	1728	3.29	Below LOD	Below LOD	15.52	0.124	2.72	6.76	1.321	38.7	13.76	165.5	62.3	276.3	60.6	554	98.1	10470		295	563	0.523979	3.34743	46.2273	0.249688	138.303	137.303	0.226325	428.021	427.021	0.394593	2.13768	2.63045	3.65709
IT-BOR1 - 40	rim of 39			17.9024	0.258639	Below LOD	308	2.48561	669.187	32.9063	656.963	684.067		0.57	468100	1425	7.72	0.097	Below LOD	16.72	0.0487	1	3.51	0.768	25.27	9.63	125.7	51.01	234.6	53.36	496	94.7	10390		276	667	0.413793	3.9459	45.0529	0.249304	636.129	635.129	0.229467	70.1175	69.1175	0.115008	2.80286	1.83959	4.1366
IT-BOR1 - 43	rim of 42			17.236	0.262024	Below LOD	153.3	2.86317	680.687	33.6078	668.165	695.936		0.33	459200	578	1.58	Below LOD	Below LOD	8.17	0.022	0.49	1.18	0.29	6.59	2.83	39	17.92	94.8	25.43	285	63.6	10080		249.9	477.8	0.523022	7.30769	45.5556	0.317935	1169.09	1168.09	0.235339	198.761	197.761	0.108159	3.06748	2.29614	4.33682
IT-BOR1 - 45	rim of 43			17.5859	0.266549	Below LOD	154.9	2.39122	666.087	32.7186	653.942	680.868		0.51	472900	991	3.59	0.081	Below LOD	11.79	0.0339	0.6	1.52	0.404	12.12	4.97	71.8	31.9	167	42.7	458	95.4	10350		311	723	0.430152	6.37883	45.6908	0.287761	1472.49	1471.49	0.217523	555.711	554.711	0.150386	3.16776	2.74407	4.32894
IT-BOR1 - 46	rim			17.4534	0.403611	Below LOD	111.7	2.10805	656.133	32.1199	644.243	670.601		0.41	458000	509	1.22	Below LOD	Below LOD	6.96	0.0187	0.38	0.9	0.243	7.21	2.75	37.1	16.03	82.2	20.58	224.4	48.6	9880		188	390	0.482051	6.04852	46.3563	0.291636	1158.25	1157.25	0.228926	351.986	350.986	0.141292	3.06343	2.54529	4.31922
IT-BOR1 - 48	rim			17.2344	0.308322	Below LOD	352	3.37707	694.473	34.4595	681.588	710.169		0.72	465600	932	2.67	Below LOD	0.74	15.5	0.193	1.4	1.89	0.479	12.26	5.04	67.5	30	155	39.6	421	91	9630		392	594	0.659933	6.23704	48.3489	0.304217	687.139	686.139	0.198836	557.401	556.401	0.165755	2.83641	2.74539	3.48823
IT-BOR1 - 49	rim			17.2782	0.343611	Below LOD	158.7	4.01683	709.396	35.3948	696.113	725.584		0.473	460700	694	1.8	0.079	Below LOD	10.01	0.0264	0.48	1.38	0.322	8.8	3.68	49.9	22.1	115.5	29.9	321	69.5	9760		170	344	0.494186	6.43287	47.2029	0.282487	1340.13	1339.13	0.224818	543.29	542.29	0.153951	3.12682	2.73423	4.11495
IT-BOR1 - 50	rim			17.1768	0.279044	Below LOD	181.2	4.23707	714.081	35.6913	700.672	730.424		0.51	473000	796	1.96	Below LOD	Below LOD	12.94	0.0338	0.75	1.65	0.422	10.94	4.23	58.9	25.37	127.4	32.98	349	71.6	9740		363	542	0.669742	5.9253	48.5626	0.303659	990.319	989.319	0.232078	332.441	331.441	0.149259	2.99534	2.52041	4.20508
IT-BOR1 - 51	rim			17.3824	0.500276	Below LOD	182	2.62195	673.497	33.1682	661.161	688.515		Below LOD	439000	561	1.52	Below LOD	Below LOD	10.04	0.063	0.37	1.28	0.41	7.7	3.1	41.9	17.83	92.7	23.72	247	56.1	9970		480	672	0.714286	5.89499	44.0321	0.399261	1530.84	1529.84	0.34366	1521.47	1520.47	0.330234	3.18465	3.18198	4.02803
IT-BOR1 - 52	rim			17.0258	0.424685	Below LOD	162	3.46098	696.556	34.5893	683.616	712.32		0.503	452000	711	1.67	Below LOD	Below LOD	9.27	0.028	0.61	1.28	0.308	8.33	3.36	48.1	22.05	117.2	30.45	334.1	72	9630		176.5	364.5	0.484225	6.94595	46.9367	0.288368	1087.97	1086.97	0.208041		-1		3.03622	#NUM!	4.11454
IT-BOR1 - 53	rim	old		20.1	0.431132	Below LOD	194.2	4.32098	715.813	35.8013	702.357	732.214		0.51	454300	696	1.55	Below LOD	Below LOD	10.55	0.04	0.46	1.36	0.363	8.91	3.58	49.9	21.93	113.5	29.44	312.2	70.5	9580		338	521	0.648752	6.25651	47.4217	0.318803	1473.52	1472.52	0.258184	731.985	730.985	0.188763	3.16806	2.86391	4.11478
IT-BOR1 - 54	rim			17.6814	0.250917	Below LOD	213	3.47146	696.814	34.6053	683.867	712.586		0.476	466700	977	1.84	Below LOD	Below LOD	11.59	0.074	1.24	2.56	0.587	14.92	5.74	75.4	32.2	161.4	40.4	424	88.1	9630		309	492	0.628049	5.62334	48.4631	0.290374	450.193	449.193	0.223963	72.9275	71.9275	0.107193	2.65243	1.85689	3.82273
IT-MU2 - 1	rim			17.9236	0.246594	Below LOD	202.2	3.03098	685.399	33.8976	672.753	700.799		0.6	473000	1080	3.71	Below LOD	Below LOD	14.73	Below LOD	0.78	1.86	0.436	13.28	5.78	78.2	34.56	180	45.5	484	102.8	10230		448	785	0.570701	6.18926	46.2366	0.268197	1285.58	1284.58	0.199558	972.272	971.272	0.175978	3.10876	2.98734	#VALUE!
IT-MU2 - 2	rim			17.4511	0.296684	Below LOD	357	2.43317	667.477	32.8027	655.297	682.303		1.1	460600	967	3.29	0.12	2.9	18.4	0.76	3.2	1.99	0.399	11.46	4.78	68.3	30.7	164	42.5	455	97.9	10130		326	695	0.469065	6.66179	45.4689	0.255433	386.556	385.556	0.131107	561.866	560.866	0.124024	2.58609	2.74886	2.96117
IT-MU2 - 3	core			18.2078	0.373134	Below LOD	174.2	4.71951	723.682	36.3031	710.013	740.348		0.56	482000	745	1.4	Below LOD	Below LOD	9.81	0.046	0.74	1.64	0.367	10.6	4.27	55.4	23.7	121.6	31.1	331	67	10010		181	341	0.530792	5.97473	48.1518	0.269101	725.338	724.338	0.206921	168.559	167.559	0.116183	2.85994	2.22417	3.87
IT-MU2 - 5	rim			16.9172	0.365581	Below LOD	223	4.5622	720.643	36.1089	707.057	737.207		0.68	446000	877	2.3	Below LOD	Below LOD	14.79	0.04	0.92	2.27	0.39	12.19	5.22	67.6	28	137.9	33.23	343.9	72.6	9650		787	843	0.933571	5.08728	46.2176	0.226659	730.229	729.229	0.179122	780.552	779.552	0.179559	2.86286	2.89184	4.32377
IT-MU2 - 6	rim			18.1625	0.226689	Below LOD	535	3.47146	696.814	34.6053	683.867	712.586		1.12	471300	1146	4.16	0.149	4.34	24.1	0.97	4.93	2.63	0.549	14.75	5.95	82.7	36.54	188.3	47.65	509	106.3	10010		445	805	0.552795	6.15478	47.0829	0.269477	281.09	280.09	0.136818	224.757	223.757	0.103522	2.4473	2.34978	2.91902
IT-MU2 - 7	rim			17.2491	0.241193	Below LOD	238	3.44	696.039	34.5571	683.113	711.786		0.53	444300	1176	5.39	Below LOD	Below LOD	24.6	0.097	1.56	3.28	0.76	20.6	7.44	94.4	38.5	184.2	44.4	447	91.7	9840		1502	1355	1.10849	4.73517	45.1524	0.282662	617.977	616.977	0.230567	59.0443	58.0443	0.0940168	2.79027	1.76376	4.14517
IT-MU2 - 8	rim of 9			17.355	0.231753	Below LOD	200.3	3.10439	687.393	34.0206	674.695	702.858		0.532	466400	980	3.23	Below LOD	Below LOD	17.44	0.054	0.84	2.22	0.556	15.1	5.72	77.4	31.8	158.7	38.24	395.2	82.2	10270		1054	1204	0.875415	5.10594	45.4138	0.293585	1012.72	1011.72	0.243395	772.071	771.071	0.221725	3.00506	2.88709	4.34823
IT-MU2 - 11	rim			17.6247	0.227384	Below LOD	190.2	2.48561	669.187	32.9063	656.963	684.067		0.412	464000	959	2.44	0.128	Below LOD	17.05	0.046	0.81	1.92	0.433	12.73	5.24	70.2	30.65	156.5	40.4	424	90	10010		452.8	723	0.626279	6.03989	46.3536	0.267761	1268.53	1267.53	0.20512	51.5792	50.5792	0.0591493	3.10296	1.70397	4.19638
IT-MU2 - 12	rim			17.9509	0.296739	Below LOD	213.9	2.15	657.676	32.2122	645.746	672.191		0.528	462100	1190	4.14	Below LOD	Below LOD	13.4	0.0355	0.67	1.77	0.43	14.36	5.76	83.3	38.2	201	51.8	546	115.1	9970		334	729	0.458162	6.55462	46.349	0.260752	1544.3	1543.3	0.199615	1690.31	1689.31	0.206688	3.18845	3.22771	4.3125
IT-MU2 - 14	rim			18.0517	0.286311	Below LOD	197.3	2.77927	678.245	33.4582	665.786	693.415		0.53	483900	1270	4.09	Below LOD	Below LOD	12.99	0.04	0.82	2.03	0.495	16.38	6.64	93.9	41.18	211.4	51.9	543	114	10040		350	707	0.49505	5.78275	48.1972	0.262436	1067.25	1066.25	0.200815	908.505	907.505	0.191496	3.02786	2.95785	4.24736
IT-MU2 - 17	rim			17.2868	0.357569	Below LOD	187	110.122	1119.25	66.5225	1092.73	1151.99		0.42	443300	970	3.38	Below LOD	0.044	13.85	0.082	0.85	1.68	0.505	12.34	4.92	69.7	30.57	160.2	40	429	93.6	9290		442	718	0.615599	6.15495	47.718	0.33908	1101.45	1100.45	0.244845	388.229	387.229	0.156275	3.04157	2.58797	3.94231
IT-MU2 - 22	inner part of 23			17.4958	0.418823	Below LOD	134	2.46463	668.507	32.865	656.3	683.365		0.33	494600	423	1.09	Below LOD	Below LOD	4.09	0.0108	0.107	0.54	0.152	5.18	2.03	30.4	13.56	71.3	18.15	196.9	39.9	10830		59.8	201.6	0.296627	6.47697	45.6694	0.277847	3152.84	3151.84	0.254278	464.433	463.433	0.135671	3.49856	2.66599	4.27107
IT-MU2 - 23	inner part of 22			18.3676	0.483803	Below LOD	117	2.19195	659.193	32.3032	647.225	673.756		0.424	478300	346	1.05	Below LOD	Below LOD	3.41	Below LOD	0.152	0.56	0.138	3.7	1.69	24.2	10.82	57.5	14.64	155.4	32.6	10690		49.2	161.9	0.303891	6.42149	44.7428	0.293095	1657.29	1656.29	0.236784	179.764	178.764	0.10448	3.21914	2.25228	#VALUE!
IT-MU2 - 24	rim			17.4973	0.280878	Below LOD	155.7	2.10805	656.133	32.1199	644.243	670.601		0.51	453000	770	3.05	0.125	Below LOD	9.26	0.029	0.471	1.17	0.27	9.05	3.68	54.7	24.47	128.5	32.74	350.8	75.9	10000		212.4	517.7	0.410276	6.41316	45.3	0.253671	1510.46	1509.46	0.189661	1583.89	1582.89	0.188656	3.17882	3.19945	4.25168
IT-MU2 - 27	rim			17.9505	0.235342	Below LOD	232	2.80024	678.862	33.4959	666.386	694.051		0.77	469600	885	3.36	Below LOD	1.64	17.9	0.36	1.89	2.04	0.431	13.4	5.01	68.7	28.8	144	35.1	364	75.2	10510		550	822	0.6691	5.2984	44.6813	0.252019	474.137	473.137	0.162791	250.182	249.182	0.117451	2.67499	2.39652	3.35857
IT-MU2 - 28	rim of 29			17.9435	0.256064	Below LOD	170.9	1.95073	650.113	31.7607	638.375	664.392		0.386	468800	832	2.63	Below LOD	Below LOD	10.58	0.0283	0.439	1.32	0.35	10.5	4.39	61.5	26.6	135	33.9	362	74.6	10380		394	752	0.523936	5.88618	45.1638	0.287415	1634.33	1633.33	0.230417	335.813	334.813	0.130721	3.21307	2.5248	4.42443
IT-MU2 - 29	rim of 28			17.7648	0.312617	Below LOD	151.3	4.23707	714.081	35.6913	700.672	730.424		0.43	456700	509	1.15	Below LOD	Below LOD	8.4	0.0245	0.385	0.96	0.269	6.69	2.71	36.76	16.31	81.8	20.77	227.4	48.2	9720		241.4	414	0.583092	6.18607	46.9856	0.324509	1365.84	1364.84	0.252147	339.054	338.054	0.144362	3.13508	2.52899	4.22783
IT-MU2 - 30	rim	disc.		17.7363	0.590786	Below LOD	132	3.25122	691.266	34.2604	678.466	706.857		0.514	508000	919	1.35	Below LOD	0.084	10.59	0.135	1.75	2.71	0.66	15.61	5.72	74.3	30.2	146.9	36.8	387	75.6	10600		341	494	0.690283	5.20861	47.9245	0.310228	248.839	247.839	0.229196	154.941	153.941	0.182392	2.39417	2.18736	3.56339
IT-MU2 - 32	rim			17.8013	0.318804	Below LOD	134.9	3.64976	701.096	34.8729	688.035	717.009		0.39	477500	591	1.47	Below LOD	Below LOD	9.38	0.0264	0.478	1.22	0.316	7.55	3.09	44	18.6	95.3	24.4	260	55.2	10010		330	507	0.650888	5.90909	47.7023	0.318315	1169.58	1168.58	0.247136	471.475	470.475	0.169358	3.06766	2.67254	4.2834
IT-MU2 - 33	rim	old		20.4142	0.405471	Below LOD	229	3.04146	685.686	33.9153	673.033	701.096		0.54	443200	1016	4.09	Below LOD	0.21	16.1	0.087	1.09	2.16	0.55	13.7	5.62	74.2	32	162.2	38.9	413	87.4	9860		741	1015	0.730049	5.56604	44.9493	0.3091	790.723	789.723	0.22872	333.155	332.155	0.158346	2.89747	2.52134	4.06695
IT-MU2 - 34	rim			17.2783	0.233143	Below LOD	712	2.48561	669.187	32.9063	656.963	684.067		1.41	464800	980	3.42	0.117	4.7	27.4	1.12	5.45	2.98	0.598	15.77	5.9	77.2	31.93	156.7	38.72	406	83.2	9800		774	1005	0.770149	5.25907	47.4286	0.266686	210.901	209.901	0.146144	186.434	185.434	0.116555	2.32201	2.26819	2.95295
IT-MU2 - 37	rim			17.4131	0.204094	Below LOD	247.2	2.59049	672.519	33.1087	660.209	687.505		0.528	466500	1234	4.25	Below LOD	Below LOD	14.98	0.0398	1.01	2.51	0.582	17.27	6.86	94.3	40.45	199.3	48.67	503	101.1	9480		681	994	0.685111	5.33404	49.2089	0.270249	795.291	794.291	0.213574	425.033	424.033	0.172465	2.89998	2.6274	4.3975
IT-MU2 - 38	rim of 39			18.0288	0.20766	Below LOD	756	1.85634	646.303	31.5346	634.662	660.464		1.44	477900	1392	7.17	0.198	5.57	31.2	1.34	6.16	3.79	0.586	21.54	8.14	109.3	45.8	220.3	53.9	547.5	105	11160		1502	2058	0.729835	5.00915	42.8226	0.19828	215.273	214.273	0.11099	631.044	630.044	0.149228	2.33097	2.79937	3.18634
IT-MU2 - 39	rim of 38			17.5469	0.255187	Below LOD	167.6	1.99268	651.757	31.8586	639.977	666.087		0.362	464000	771	2.14	0.104	Below LOD	11.3	0.0151	0.594	1.38	0.287	10.75	4.22	58.7	24.64	124.6	30.72	323.4	65.8	10490		480	862	0.556845	5.50937	44.2326	0.227804	1128.15	1127.15	0.17623	586.684	585.684	0.139602	3.05198	2.76766	4.75653
IT-MU2 - 41	rim of 42			18.1148	0.301099	Below LOD	142.9	2.62195	673.497	33.1682	661.161	688.515		0.316	465900	597	1.5	Below LOD	0.018	7.98	0.0282	0.418	0.99	0.275	7.63	3.09	42.1	18.72	95.4	24.13	266	56.4	10240		220	464	0.474138	6.31829	45.498	0.305898	1296.01	1295.01	0.232815	266.867	265.867	0.124654	3.11227	2.42466	4.21627
IT-MU2 - 42	inner part of 41			18.0318	0.37725	Below LOD	125	1.85634	646.303	31.5346	634.662	660.464		0.35	472600	345	0.92	0.096	0.42	5.98	0.074	0.56	0.58	0.124	4.35	1.7	24.2	10.7	55.4	15.2	164	36.5	10650		96	239	0.401674	6.77686	44.3756	0.238664	795.286	794.286	0.144056	123.146	122.146	0.0613267	2.89998	2.08688	3.50917
IT-MU2 - 44	rim			17.3661	0.255573	Below LOD	211.8	2.63244	673.821	33.188	661.477	688.849		0.46	458000	1189	4.14	Below LOD	Below LOD	13.65	0.0452	1.01	2.31	0.534	16.31	6.57	92.4	38.98	194.9	47.19	484.4	95.7	9440		415	779	0.532734	5.24242	48.5169	0.26597	746.179	745.179	0.203303	775.765	774.765	0.212939	2.87226	2.88917	4.2364
IT-MU2 - 45	rim			17.1658	0.263691	Below LOD	174	1.81439	644.558	31.4313	632.96	658.665		0.507	470000	900	3.17	0.073	0.202	14.6	0.078	0.88	1.9	0.367	13.38	5.12	69.1	29.26	146.9	35.52	374.4	76.3	10460		585	885	0.661017	5.41823	44.9331	0.222528	871.527	870.527	0.17248	350.018	349.018	0.121552	2.93978	2.54285	4.05485
IT-MU2 - 46	rim of 47			18.1292	0.435673	Below LOD	130.1	3.04146	685.686	33.9153	673.033	701.096		0.384	458000	415.9	0.85	Below LOD	Below LOD	6.99	0.0105	0.382	0.9	0.213	5.72	2.301	30.3	13.08	66.5	16.84	184.2	38.85	9870		165	300.5	0.549085	6.07921	46.4032	0.287001	1029.66	1028.66	0.223484	201.032	200.032	0.114982	3.01227	2.3011	4.45666
IT-MU2 - 47	core of 46			17.5341	0.372792	Below LOD	298	6.63878	755.334	38.3607	740.79	773.084		0.89	488400	1743	4.21	0.117	0.038	27.1	0.094	1.47	3.1	0.879	23.9	9.46	132	56.3	280.8	68.8	713	138.9	9380		831	873	0.95189	5.40152	52.0682	0.3122	1068.2	1067.2	0.234222	1048.54	1047.54	0.240409	3.02825	3.02017	3.96789
IT-MU2 - 48	rim			17.5692	0.26559	Below LOD	209.1	2.51707	670.199	32.9677	657.948	685.111		0.6	466900	1059	4.1	Below LOD	0.298	14.25	0.103	0.96	1.81	0.399	12.94	5.26	75.4	33.21	173.3	43.98	478.6	101	9980		413.1	793	0.520933	6.34748	46.7836	0.252052	1029.04	1028.04	0.177556	375.359	374.359	0.11503	3.01201	2.57329	3.88644
IT-MU2 - 49	rim of 50			17.2298	0.255554	Below LOD	179	2.65341	674.465	33.2273	662.104	689.514		0.59	474100	910	2.83	0.101	0.118	14.16	0.061	0.8	1.73	0.368	12.22	4.76	66.6	28.68	145.8	37.59	401.4	83.4	10040		473.4	795	0.595472	6.02703	47.2211	0.244688	1085.21	1084.21	0.184687	1085.39	1084.39	0.179	3.03511	3.03519	4.11504
IT-MU2 - 50	rim of 49			17.6894	0.249739	Below LOD	246	4.01683	709.396	35.3948	696.113	725.584		0.59	461700	1063	2.62	Below LOD	0.17	14.15	0.091	1.01	2.21	0.512	14.24	5.45	76.2	33.25	170.1	42.6	447	94.4	9300		352.3	562.8	0.625977	5.86614	49.6452	0.279025	794.512	793.512	0.213199	409.86	408.86	0.159572	2.89955	2.61158	3.79131
IT-MU2 - 51	rim			17.9077	0.298729	Below LOD	171.4	3.10439	687.393	34.0206	674.695	702.858		0.521	471300	838	2.26	0.085	Below LOD	11.74	0.041	0.589	1.42	0.325	9.4	4.02	57.1	25.5	137	35.6	393	83.7	9690		306	561	0.545455	6.88266	48.6378	0.271956	1474.18	1473.18	0.200274	1287.73	1286.73	0.180629	3.16826	3.10949	4.13618
IT-PUB - 1	rim			17.6955	0.319065	Below LOD	197	2.46463	668.507	32.865	656.3	683.365		0.51	469500	875	2.96	0.106	0.18	10.03	0.088	0.57	1.36	0.338	10.36	4.12	59.6	26.76	144.5	38.14	419.2	91.4	9930		222.5	559.8	0.397463	7.03356	47.281	0.27529	1390.55	1389.55	0.20551	307.852	306.852	0.10986	3.14287	2.48693	3.80355
IT-PUB - 5	rim	disc.		18.3045	0.671529	Below LOD	146.1	4.3	715.382	35.7739	701.939	731.77		0.56	524000	1122	1.59	Below LOD	Below LOD	13.5	0.105	2.02	3.79	1.07	20	7.22	90.5	36.7	175	42	456	84	10620		486	504	0.964286	5.03867	49.3409	0.375727	234.184	233.184	0.299766	580.512	579.512	0.416386	2.3677	2.76306	3.68124
IT-PUB - 6	rim			17.3725	0.24187	Below LOD	231	3.80707	704.734	35.1011	691.576	720.767		0.526	471400	1219	3.69	Below LOD	0.059	21.69	0.073	1.18	2.79	0.654	18.69	7.32	95.5	39.24	194.8	47.45	503.9	104	9850		916	1174	0.780239	5.27644	47.8579	0.276882	899.743	898.743	0.221881	1638.56	1637.56	0.275796	2.95364	3.2142	4.20635
IT-PUB - 8	inner part			18.0017	0.435451	Below LOD	270	3.05195	685.973	33.933	673.312	701.392		0.53	467900	759	1.09	Below LOD	Below LOD	7.44	0.03	0.64	1.55	0.306	10.17	4.01	55.8	23.7	122.4	30.8	333	73.2	9470		174	335	0.519403	5.96774	49.4087	0.235624	692.211	691.211	0.183586	208.513	207.513	0.110324	2.83961	2.31704	4.04792
IT-PUB - 9	rim			18.5099	0.318188	Below LOD	145	3.39805	694.998	34.4922	682.099	710.711		0.49	485200	787	2.23	Below LOD	Below LOD	10.1	0.041	0.64	1.43	0.363	9.69	3.79	53.6	24	131.4	34.2	389	83.1	9880		253	516	0.49031	7.25746	49.1093	0.298126	1142.21	1141.21	0.221961	398.816	397.816	0.137696	3.05737	2.59968	4.09987
IT-PUB - 10	rim			17.7637	0.332101	Below LOD	341	2.93659	682.776	33.7361	670.199	698.092		0.77	484000	1659	4.23	Below LOD	Below LOD	17.54	0.081	1.45	3.84	0.782	25.4	9.9	130.1	54.8	267.2	64.4	663	130.1	9580		741	1038	0.713873	5.09608	50.5219	0.242074	565.989	564.989	0.200098	292.327	291.327	0.161989	2.75204	2.46438	4.10771
IT-PUB - 11	rim			17.9253	0.287591	Below LOD	250	2.56951	671.862	33.0687	659.568	686.827		0.59	474000	1416	2.09	Below LOD	Below LOD	12.46	0.094	1.7	3.96	0.769	22.8	8.83	114.3	46.7	226.1	54.3	555	107.7	9950		332.2	589	0.564007	4.85564	47.6382	0.24742	295.721	294.721	0.201044	323.426	322.426	0.21184	2.46941	2.50843	3.79699
IT-PUB - 13	rim			18.3186	0.300887	Below LOD	207	5.91512	744.405	37.6432	730.166	761.777		0.52	467700	1069	1.76	0.074	Below LOD	10.14	0.0304	0.81	2.12	0.49	13.57	5.39	75.4	33.44	175.9	44.6	479	98.1	9350		267	494	0.540486	6.35279	50.0214	0.279294	773.689	772.689	0.219249	157.636	156.636	0.117835	2.888	2.19489	4.21085
IT-PUB - 14	inner part			17.7273	0.343666	Below LOD	190	3.28268	692.077	34.3107	679.256	707.695		0.435	463100	912	0.76	Below LOD	Below LOD	9.11	0.085	1.27	2.71	0.634	16.17	5.87	72.8	29.5	145.7	35.3	367	73.5	9750		226	332	0.680723	5.04121	47.4974	0.292801	279.579	278.579	0.240349	217.52	216.52	0.214593	2.44495	2.3355	3.59172
IT-PUB - 15	inner part			18.8038	0.268204	Below LOD	263	1.89829	648.016	31.6361	636.331	662.23		0.6	465300	1345	1.91	Below LOD	Below LOD	11.8	0.083	1.78	3.28	0.711	22.3	8.36	109.4	44.2	218	52.4	546	109.5	10210		418	662	0.63142	4.99086	45.573	0.254158	299.138	298.138	0.194306	501.931	500.931	0.233675	2.47442	2.69978	3.90178
IT-PUB - 16	rim			17.7552	0.265141	Below LOD	205	2.9261	682.48	33.7179	669.911	697.786		0.69	462900	1379	4.92	0.086	Below LOD	15.86	0.046	0.71	2.15	0.489	17.07	7.23	101.1	44.8	226.5	55.4	581	120.7	10050		547	906	0.603753	5.74679	46.0597	0.246772	1511.39	1510.39	0.196943	124.137	123.137	0.0797407	3.17909	2.09039	4.29437
IT-PUB - 17	rim			18.2771	0.379235	Below LOD	214	4.5622	720.643	36.1089	707.057	737.207		0.58	476900	704	1.59	0.079	0.12	12.98	0.078	0.98	1.72	0.329	10.31	4.01	53.34	22.08	112.8	28.24	301.6	62.4	9870		360.8	506.5	0.71234	5.65429	48.3181	0.23885	661.212	660.212	0.175181	350.538	349.538	0.129169	2.81968	2.54349	3.81248
IT-PUB - 18	rim of 19			19.1175	0.336877	Below LOD	159	1.5522	632.817	30.7414	621.512	646.562		0.52	468200	779	3.34	Below LOD	Below LOD	9.58	0.0204	0.457	1.61	0.41	12.08	4.68	62.7	26.4	128.8	30.4	303	59.4	10770		103.1	323	0.319195	4.83254	43.4726	0.284224	1023.08	1022.08	0.253056	783.879	782.879	0.252435	3.00948	2.89369	4.19957
IT-PUB - 19	rim of 18			18.3783	0.340986	Below LOD	228	3.33512	693.415	34.3938	680.558	709.076		0.399	487100	869	3.39	Below LOD	Below LOD	15.24	0.062	1.1	2.61	0.581	15.36	5.92	73.4	29.36	138	31.22	306.2	55.8	10750		206.3	441.1	0.467694	4.17166	45.3116	0.280533	462.626	461.626	0.235371	583.34	582.34	0.279011	2.66429	2.76518	3.85215
IT-PUB - 20	rim			17.788	0.373702	Below LOD	123.3	3.28268	692.077	34.3107	679.256	707.695		0.359	463200	631	1.67	Below LOD	Below LOD	8.1	0.0156	0.36	0.89	0.265	7.91	3.02	42.1	19.17	102.5	27.71	309	67.3	9790		156.3	353	0.442776	7.33967	47.3136	0.305342	1868.72	1867.72	0.234448	684.194	683.194	0.152799	3.27131	2.83454	4.35465
IT-PUB - 21	inner part			17.9926	0.302401	Below LOD	383	3.57634	699.354	34.764	686.34	715.21		0.436	467500	1386	2.69	Below LOD	Below LOD	13.45	0.086	1.63	4.57	0.874	30.2	10.37	129.1	49.6	222	47.4	438.7	79.1	10000		204	422.2	0.483183	3.39814	46.75	0.227443	222.459	221.459	0.212265	316.193	315.193	0.280968	2.34529	2.49858	3.69102
IT-PUB - 22	rim of 23	disc.		18.5257	0.525172	Below LOD	110.4	5.39073	735.783	37.0824	721.782	752.859		0.317	481200	551	0.59	Below LOD	Below LOD	4.4	0.0215	0.406	1.25	0.21	8.72	3.3	44.5	18.8	90.3	21.3	219	40.3	9480		59	130	0.453846	4.92135	50.7595	0.19446	494.171	493.171	0.168573	221.028	220.028	0.136833	2.693	2.34248	3.7815
IT-PUB - 23	rim of 22			18.6131	0.466206	Below LOD	117.6	5.2439	733.246	36.9183	719.315	750.235		0.397	472500	532	0.459	Below LOD	Below LOD	5.03	0.0169	0.304	1.06	0.264	8.07	3.05	40.3	17.2	84.9	20.4	215	42.9	9740		59.7	126.6	0.471564	5.33499	48.5113	0.275955	855.919	854.919	0.246508	638.662	637.662	0.234974	2.93192	2.80459	3.87455
IT-PUB - 24	rim of 25			17.5529	0.248785	Below LOD	230.6	3.89098	706.623	35.22	693.415	722.719		0.83	466900	1461	5.47	Below LOD	Below LOD	31.4	0.076	1.37	3.12	0.812	21.6	8.05	109.2	46.1	232	58.7	634	128.6	9850		1353	1635	0.827523	5.80586	47.401	0.302396	1235.35	1234.35	0.239291	946.087	945.087	0.211952	3.09144	2.97547	4.3327
IT-PUB - 26	rim			17.4084	0.26421	Below LOD	258	2.4961	669.526	32.9268	657.292	684.416		0.66	466100	1427	5.33	0.072	0.024	15.5	0.052	0.91	2.63	0.541	19.3	8.03	109.3	48.1	233	57	590	116.2	9640		496	885	0.560452	5.39799	48.3506	0.232148	978.225	977.225	0.18742	177.118	176.118	0.104229	2.98999	2.2458	4.23094
IT-PUB - 27	rim			17.5704	0.24343	Below LOD	343	4.00634	709.168	35.3804	695.891	725.348		0.67	457500	1482	4.96	Below LOD	0.22	20.5	0.124	1.29	2.86	0.732	21.2	8.19	110	48.1	239.9	59.2	622	127.6	9340		784	1083	0.723915	5.65455	48.9829	0.287398	901.555	900.555	0.222014	355.52	354.52	0.155798	2.95451	2.54964	3.94121
IT-PUB - 28	rim	old		37.4249	0.533633	Below LOD	273	5.02366	729.329	36.6656	715.506	746.186		0.57	480000	1074	4.16	Below LOD	0.055	17.81	0.055	1.02	3	0.669	18.92	7.03	90.9	36.3	169.3	39.6	396	75	10350		329.2	569	0.578559	4.35644	46.3768	0.271474	640.432	639.432	0.241328	252.512	251.512	0.183601	2.80579	2.40056	4.01475
IT-PUB - 30	core of 29			18.2647	0.412363	Below LOD	205	3.39805	694.998	34.4922	682.099	710.711		0.66	470300	1549	1.96	0.083	Below LOD	17.28	0.171	3.36	7.8	1.57	39.9	13.2	153	56	239	50.4	454	80.3	9740		251	379	0.662269	2.96732	48.2854	0.272076	94.8908	93.8908	0.255835	234.888	233.888	0.406433	1.97262	2.36901	3.34564
IT-PUB - 31	rim of 32			17.6267	0.30457	Below LOD	217	3.08341	686.827	33.9857	674.144	702.274		0.56	480900	1358	5.21	0.113	Below LOD	14.79	0.059	0.71	2.17	0.542	15.88	6.78	97.2	43.5	225.4	57.3	631	127.6	9650		378	807	0.468401	6.49177	49.8342	0.282272	1521.92	1520.92	0.22215	71.4358	70.4358	0.0711309	3.18211	1.84779	4.13602
IT-PUB - 32	core of 31			17.3459	0.467902	Below LOD	308	2.30732	663.245	32.547	651.173	677.936		0.551	496000	907	1.67	Below LOD	Below LOD	7.17	0.028	0.58	1.41	0.401	11.59	4.71	68.4	28.98	149.9	39.3	445	88.1	10080		224	560	0.4	6.50585	49.2063	0.303261	918.995	917.995	0.228657	535.418	534.418	0.186661	2.96284	2.72788	4.30103
IT-PUB - 33	rim			18.2927	0.364408	Below LOD	360	4.4678	718.779	35.99	705.243	735.28		1.17	487000	646	1.3	Below LOD	2.6	13.7	0.56	3	1.8	0.424	9.7	3.5	46.5	20.3	106.4	26.6	297	57.1	10230		146	284	0.514085	6.3871	47.6051	0.310218	221.515	220.515	0.172478	431.232	430.232	0.186407	2.34344	2.6337	2.70513
IT-PUB - 35	rim of 37			17.6403	0.307066	Below LOD	243	4.92927	727.607	36.5549	713.831	744.405		0.53	461300	1405	4.71	Below LOD	Below LOD	14.89	0.056	0.86	2.58	0.586	17.9	7.37	105.1	47.1	234	57	597	118.2	8990		311	597	0.520938	5.6803	51.3126	0.263624	1052.02	1051.02	0.212038	1359.13	1358.13	0.245147	3.02161	3.13294	4.02779
IT-PUB - 37	rim of 35			18.2288	0.353712	Below LOD	159.2	3.37707	694.473	34.4595	681.588	710.169		0.492	463400	636	1.5	Below LOD	Below LOD	8.25	0.0282	0.565	1.25	0.294	8.69	3.44	47.7	20.4	103.3	25.6	267	55.5	9510		202	353	0.572238	5.59748	48.7277	0.272713	838.376	837.376	0.207527	430.73	429.73	0.15931	2.92292	2.6332	4.09753
IT-PUB - 38	inner part			18.1218	0.386713	Below LOD	133.3	3.80707	704.734	35.1011	691.576	720.767		0.5	472600	579	1.08	0.074	Below LOD	7.81	0.0384	0.582	1.38	0.291	8.48	3.18	43.1	18.43	94.8	24.38	269	56.9	10100		139	273.1	0.508971	6.2413	46.7921	0.260063	734.784	733.784	0.206888	375.029	374.029	0.150424	2.86557	2.57291	3.85199
IT-PUB - 39	inner part			17.6579	0.256373	Below LOD	285	2.94707	683.071	33.7542	670.486	698.396		0.514	481000	944	3.21	0.058	Below LOD	8.52	0.0286	0.57	2.03	0.319	13.79	5.63	76.4	31.49	153.7	37.02	382.5	73.5	11600		212.9	737	0.288874	5.00654	41.4655	0.184325	739.002	738.002	0.161414	393.719	392.719	0.138608	2.86806	2.59408	4.4111
IT-PUB - 40	rim			17.2171	0.333228	Below LOD	205.6	2.6639	674.786	33.2468	662.417	689.845		0.619	465600	1461	4.04	Below LOD	Below LOD	22.8	0.067	1.35	3.04	0.751	21.8	8.48	111.6	47.7	237.4	57.7	612	125.8	9980		666	989	0.673407	5.48387	46.6533	0.282032	897.08	896.08	0.220876	747.23	746.23	0.205153	2.95235	2.87287	4.16912
IT-PUB - 42	inner part			17.7053	0.34148	Below LOD	201.1	4.92927	727.607	36.5549	713.831	744.405		0.53	463400	1002	2.85	0.076	Below LOD	12.58	0.05	0.82	1.81	0.43	12.41	5.04	70.5	31.61	166.2	42.7	458.8	96.5	9470		227.1	436.3	0.520513	6.5078	48.9335	0.277375	1039.3	1038.3	0.204854	946.295	945.295	0.189665	3.01632	2.97557	3.94082
IT-PUB - 43	inner part			18.442	0.294921	Below LOD	154.2	2.75829	677.625	33.4202	665.182	692.775		0.342	466300	621	1.81	Below LOD	Below LOD	7.13	0.0173	0.448	1.18	0.276	8.27	3.08	43.4	19.9	104	26.6	293	63.4	10130		144.1	353	0.408215	6.75115	46.0316	0.270109	1061.97	1060.97	0.215225	571.72	570.72	0.16194	3.0257	2.75642	4.30973
IT-PUB - 45	rim			18.8532	0.322455	Below LOD	283.7	2.75829	677.625	33.4202	665.182	692.775		0.62	480200	1166	5.66	Below LOD	Below LOD	15.15	0.055	1.15	3.28	0.613	20.52	8.11	101.3	41.2	193.3	43.84	418.4	78.8	10300		168.7	423	0.398818	4.13031	46.6214	0.228433	473.1	472.1	0.198352	400.022	399.022	0.206401	2.67403	2.601	3.88598
IT-PUB - 46	rim of 47			17.5162	0.340649	Below LOD	283	3.99585	708.939	35.366	695.668	725.111		0.67	469200	780	2	0.099	1.06	13.2	0.29	1.5	1.65	0.329	10.76	3.96	56.3	25.1	130.1	32.88	353.7	74.1	9680		268	447	0.599553	6.28242	48.4711	0.23871	527.588	526.588	0.151373	263.469	262.469	0.103536	2.72147	2.41908	3.18791
IT-PUB - 49	rim			19.0253	0.390067	Below LOD	422.5	6.06195	746.708	37.7938	732.405	764.159		0.61	486800	1509	4.19	0.083	Below LOD	22.1	0.124	2.78	5.46	1.176	32.5	11.38	138.9	54.3	245.9	54.02	520.4	93.5	9170		244.8	440	0.556364	3.74658	53.0862	0.269894	219.062	218.062	0.226762	991.852	990.852	0.435126	2.33858	2.99601	3.55003
IT-PUB - 50	inner part			18.1765	0.404435	Below LOD	366	6.35561	751.179	38.0871	736.751	768.785		0.54	501000	1583	1.9	0.104	Below LOD	17.4	0.159	3.11	6.28	0.92	37.3	12.34	149	56.1	245	53.6	506	88	9560		188	284	0.661972	3.39597	52.4059	0.183771	130.728	129.728	0.16167	380.606	379.606	0.269341	2.11304	2.57933	3.25192
IT-PUB - 51	inner part			17.6705	0.29664	Below LOD	339		#VALUE!	#VALUE!	#VALUE!	#VALUE!		0.57	468500	954	2.04	0.065	0.12	7.69	0.074	0.58	1.4	0.288	11.56	4.89	69	30.6	159.6	40.48	435.7	90.4	10460		275.9	721	0.382663	6.31449	44.7897	0.218863	1004.47	1003.47	0.162374	29.8584	28.8584	0.0431177	3.00151	1.46027	3.9887
IT-PUB - 52	rim			18.2137	0.215765	Below LOD	690	1.69902	639.579	31.1377	628.106	653.532		1.35	460600	779	2.53	0.117	4.4	20	1.04	4.3	1.98	0.392	10.29	4.161	55.5	24.41	127.2	32.25	356.8	75.19	11250		498.2	877	0.568073	6.42883	40.9422	0.265503	255.423	254.423	0.1309	15.6206	14.6206	0.03588	2.40556	1.16497	2.92597
IT-PUB - 53	rim			18.0445	0.234796	Below LOD	180.3	2.08707	655.353	32.0732	643.482	669.795		0.497	467700	926	2.76	Below LOD	Below LOD	15.84	0.0298	0.74	1.82	0.349	13.5	5.18	71.3	29.8	150	36.91	392.3	79.3	10480		616	887	0.694476	5.5021	44.6279	0.215252	1189.61	1188.61	0.171671	154.787	153.787	0.0803675	3.07504	2.18692	4.47371
IT-KKB1 - 3	rim			17.3122	0.291724	Below LOD	129.2	2.10805	656.133	32.1199	644.243	670.601		0.345	455700	518	1.34	Below LOD	Below LOD	7.91	0.0196	0.406	1.08	0.254	7.16	2.78	38.1	16.73	86.7	21.88	243	50.23	9900		200.6	430.6	0.465862	6.37795	46.0303	0.279247	1175.09	1174.09	0.223894	342.075	341.075	0.136372	3.0697	2.53285	4.34182
IT-KKB1 - 4	rim			17.8403	0.217855	Below LOD	209	1.22707	615.693	29.7502	604.809	628.919		0.539	460400	1101	4.58	Below LOD	Below LOD	10.37	0.0203	0.403	1.29	0.272	12.31	5.31	77.1	36.1	188.3	49.1	534	111.7	10250		270	750	0.36	6.92607	44.9171	0.208674	2415.44	2414.44	0.161937	798.297	797.297	0.110506	3.38282	2.90162	4.56757
IT-KKB1 - 5	rim			17.218	0.310441	Below LOD	160.6	3.89098	706.623	35.22	693.415	722.719		0.496	458200	913	2.04	0.097	Below LOD	10.69	0.0372	0.81	1.81	0.413	12.53	4.76	66.5	29.06	149.7	38.6	427	87	9530		242.2	450	0.538222	6.42105	48.0797	0.26513	817.784	816.784	0.203062	395.441	394.441	0.148545	2.91211	2.59598	4.08267
IT-KKB1 - 8	rim			17.49	0.288273	Below LOD	190	3.97488	708.48	35.337	695.222	724.637		0.525	450100	1010	2.24	Below LOD	Below LOD	13.3	0.0354	0.81	2.09	0.52	13.5	5.42	73.3	32.1	165	41.4	447	90.3	9550		341	530	0.643396	6.09823	47.1309	0.299286	949.287	948.287	0.236599	972.854	971.854	0.236514	2.97694	2.9876	4.17527
IT-KKB1 - 9	rim			17.7648	0.277411	Below LOD	197	2.38073	665.736	32.6974	653.6	680.506		0.52	469700	1054	2.36	Below LOD	Below LOD	9.95	0.054	1.1	2.48	0.531	16.59	6.06	80.7	34.7	175.4	43.1	469	95.5	10130		299.4	626	0.478275	5.81165	46.3672	0.253087	463.757	462.757	0.202095	230.367	229.367	0.150958	2.66535	2.36053	4.06418
IT-KKB1 - 11	core of 10			17.7629	0.264858	Below LOD	227.9	3.34561	693.68	34.4103	680.817	709.35		0.612	451700	1323	4.39	0.145	Below LOD	19.15	0.051	1.17	2.46	0.595	17.68	6.95	98.4	43.6	221.5	54.2	578	117	9310		532	861	0.617886	5.87398	48.5177	0.275824	1006.59	1005.59	0.204712	1122.06	1121.06	0.211827	3.00242	3.04963	4.22743
IT-KKB1 - 12	rim			17.4995	0.497495	Below LOD	146	2.65341	674.465	33.2273	662.104	689.514		0.48	488300	829	3.01	Below LOD	0.014	11.32	0.0218	0.58	1.6	0.341	11.29	4.67	63.1	27.3	137.8	33.78	360.3	70.7	10560		321	614	0.522801	5.70998	46.2405	0.245285	1132.01	1131.01	0.196051	473.757	472.757	0.146204	3.05347	2.67464	4.44971
IT-KKB1 - 13	rim of 14			17.5811	0.280031	Below LOD	151.5	1.99268	651.757	31.8586	639.977	666.087		0.441	458400	730	2.17	Below LOD	Below LOD	9.46	0.0242	0.538	1.39	0.317	10.03	4.16	54.2	23.86	123.6	30.16	328.8	67.5	9890		244	481	0.507277	6.06642	46.3498	0.259552	1072.43	1071.43	0.20401	787.096	786.096	0.181406	3.02996	2.89548	4.29833
IT-KKB1 - 16	inner part			18.766	0.300134	Below LOD	123	2.52756	670.534	32.988	658.275	685.457		0.402	449800	940	0.84	0.115	Below LOD	8.81	0.071	1.35	2.79	0.657	16.7	5.82	73.3	30.4	150.2	37	393	80.1	9910		311	496	0.627016	5.36153	45.3885	0.294258	265.5	264.5	0.240673	23.4075	22.4075	0.0918695	2.42243	1.35039	3.84422
IT-KKB1 - 20	rim of 21			17.0166	0.250822	Below LOD	255	3.45049	696.298	34.5732	683.365	712.054		0.646	457700	1257	3.73	Below LOD	0.02	20.92	0.067	1.22	2.62	0.608	19.12	7.61	96.7	40.4	205	49.7	520	103.6	9810		1063	1214	0.875618	5.37746	46.6565	0.262623	881.787	880.787	0.203658	726.656	725.656	0.191566	2.94487	2.86073	4.25814
IT-KKB1 - 21	rim of 20			18.1599	0.310964	Below LOD	143.7	3.1778	689.348	34.1415	676.598	704.876		0.436	459300	622	1.81	Below LOD	Below LOD	9.2	0.0198	0.521	1.15	0.284	8.51	3.15	42.74	19.71	102.4	26.76	297.3	64.4	10010		248.8	468.6	0.530943	6.95601	45.8841	0.277542	1195.43	1194.43	0.212602	251.523	250.523	0.109845	3.07716	2.39885	4.37414
IT-KKB1 - 22	core			17.3668	0.392647	Below LOD	184	2.07659	654.96	32.0497	643.099	669.39		0.54	445000	759	1.21	Below LOD	Below LOD	7.54	0.046	0.89	1.81	0.4	10.9	4.17	56.6	23.9	123	31.2	335	71.9	9790		212	382	0.554974	5.91873	45.4545	0.275316	450.809	449.809	0.209168	153.416	152.416	0.129196	2.65303	2.18303	3.91931
IT-KKB1 - 23	rim of 24			17.7128	0.28442	Below LOD	1000	1.62561	636.262	30.9429	624.872	650.113		2.08	453800	1079	4.12	0.205	5.9	23.6	1.4	5.9	2.89	0.516	14.8	5.82	80.1	35.2	182	45.5	492	100	10080		474	866	0.547344	6.14232	45.0198	0.241209	208.904	207.904	0.121655	277.79	276.79	0.11037	2.31786	2.44215	2.79139
IT-KKB1 - 24	rim of 23			17.3467	0.226568	Below LOD	800	1.87732	647.164	31.5856	635.5	661.351		1.68	449600	727	1.91	0.142	8.1	28	1.9	8.3	2.75	0.367	11.6	4.18	56	23.44	117.6	29.38	307.3	61.9	10380		389.8	743	0.52463	5.4875	43.3141	0.198653	128.923	127.923	0.0957119	127.085	126.085	0.0737626	2.10695	2.10066	2.59224
IT-KKB1 - 25	inner part			17.7925	0.348229	Below LOD	265	3.21976	690.448	34.2097	677.67	706.013		0.9	450800	976	2.44	Below LOD	1.05	15.4	0.32	1.65	2.17	0.49	12.59	4.91	69	30.77	159.9	40.54	432.6	92.8	9630		334	576.3	0.579559	6.26957	46.812	0.286601	547.567	546.567	0.187784	757.539	756.539	0.188581	2.73764	2.87883	3.2555
IT-KKB1 - 28	rim			17.4302	0.262004	Below LOD	193.9	3.58683	699.605	34.7796	686.584	715.469		0.49	464000	1011	3.03	Below LOD	Below LOD	17.27	0.054	0.99	2.15	0.51	16.26	5.92	77.8	33.18	161.5	38.5	404	79.3	10130		864	989	0.87361	5.1928	45.8045	0.263703	844.986	843.986	0.210706	1580.87	1579.87	0.273744	2.92634	3.19862	4.2628
IT-KKB1 - 30	rim			17.7116	0.242023	Below LOD	178.9	3.01	684.822	33.862	672.191	700.204		0.484	470700	874	2.45	Below LOD	Below LOD	15.44	0.044	0.8	1.86	0.491	13.36	4.97	65.7	28.14	140.3	34.18	367.3	76.5	10490		896	1027	0.872444	5.59056	44.8713	0.301124	1011.7	1010.7	0.241518	92.7031	91.7031	0.0961681	3.00462	1.96238	4.36812
IT-KKB1 - 31	rim of 32			17.1469	0.219296	Below LOD	277.1	2.56951	671.862	33.0687	659.568	686.827		0.75	457700	1810	6.88	Below LOD	Below LOD	21.4	0.052	0.866	2.91	0.437	23.8	9.97	134.7	58.4	291	69.5	714	142.2	11130		981	1629	0.60221	5.30067	41.1231	0.160535	1489.62	1488.62	0.134751	1444.17	1443.17	0.145373	3.17279	3.15932	4.49592
IT-KKB1 - 32	rim of 31			17.5982	0.236679	Below LOD	185.8	2.91561	682.184	33.6997	669.622	697.48		0.41	451600	799	1.85	Below LOD	Below LOD	11.87	0.0224	0.729	1.8	0.38	11.66	4.51	60.5	25.89	129.5	31.37	333.4	68.3	10290		464	727	0.638239	5.51074	43.8873	0.253584	830.663	829.663	0.203557	87.9117	86.9117	0.0864621	2.9189	1.93908	4.51129
IT-KKB1 - 34	rim of 33			17.7119	0.438288	Below LOD	149.8	4.36293	716.669	35.8556	703.19	733.099		0.38	491000	627	1.77	Below LOD	0.143	8.74	0.078	0.78	1.35	0.293	8.18	3.53	45.2	19.69	103.4	25.68	280.3	59.9	10850		290.2	529	0.548582	6.20133	45.2535	0.269555	653.886	652.886	0.18844	348.878	347.878	0.136792	2.81484	2.54143	3.83136
IT-KKB1 - 35	rim of 36			18.1247	0.262611	Below LOD	182.7	4.12171	711.652	35.5375	698.309	727.915		0.409	458300	697	1.49	Below LOD	Below LOD	9.2	0.0272	0.521	1.36	0.355	8.83	3.41	47.7	21.7	115.8	29.1	323	71.5	10010		221	427	0.517564	6.77149	45.7842	0.313186	1167.67	1166.67	0.246411	194.511	193.511	0.116741	3.06695	2.2867	4.19586
IT-KKB1 - 36	core of 35, 37			17.8015	0.345523	Below LOD	129.4	3.83854	705.446	35.1459	692.269	721.503		0.48	455000	896	0.59	Below LOD	Below LOD	7.68	0.058	1.56	2.78	0.748	16.72	5.71	70.9	29.3	143.3	33.8	347	71.6	9850		190	284.6	0.667604	4.89422	46.1929	0.335417	181.846	180.846	0.268046	179.182	178.182	0.255094	2.25731	2.25086	3.69081
IT-KKB1 - 37	rim of 36			17.5986	0.341705	Below LOD	186	4.45732	718.57	35.9766	705.04	735.063		0.5	474900	875	1.9	Below LOD	Below LOD	9.05	0.023	0.78	1.67	0.512	10.76	4.077	59	27.24	146.4	38	424.3	94	10030		173.5	387.1	0.448205	7.19153	47.348	0.369257	823.749	822.749	0.272886	240.316	239.316	0.15482	2.91527	2.37897	4.2261
IT-KKB1 - 38	rim of 39			17.3418	0.232058	Below LOD	830	2.11854	656.521	32.1431	644.621	671.001		1.18	452200	1053	3.49	0.123	3.4	23.9	0.96	4.6	2.77	0.434	15.7	5.95	81.7	34.4	170.9	40.8	419	86.9	10750		776	1146	0.677138	5.12852	42.0651	0.201198	238.103	237.103	0.110672	40.4767	39.4767	0.048654	2.37494	1.59634	3.07691
IT-KKB1 - 42	core of 41, 43			17.9158	0.270935	Below LOD	305	2.13951	657.292	32.1893	645.373	671.796		0.549	449800	1054	2.52	Below LOD	Below LOD	8.56	0.049	0.89	2.28	0.382	17.6	6.67	86.7	36.7	181	41.1	412	87.2	10010		293	508	0.576772	4.75202	44.9351	0.184359	462.497	461.497	0.152732	672.842	671.842	0.18246	2.66417	2.82727	4.01567
IT-KKB1 - 43	rim of 42			17.0635	0.263756	Below LOD	323	3.15683	688.793	34.1072	676.058	704.304		0.71	474400	2057	7.23	0.057	0.14	21.5	0.087	1.65	3.46	0.793	27.1	11.27	156	69.6	341	77.9	780	155.7	9700		495	814	0.608108	5	48.9072	0.250365	752.896	751.896	0.184082	265.993	264.993	0.13125	2.87616	2.42323	3.97111
IT-KKB1 - 44	rim of 45			17.1277	0.217379	Below LOD	270	3.6078	700.104	34.8109	687.07	715.985		0.69	466200	1800	8.07	0.122	Below LOD	32.5	0.088	1.87	4.46	0.951	29.7	11.39	147	59	286	65.3	654	131.7	10380		1963	1790	1.09665	4.44898	44.9133	0.252615	707.424	706.424	0.208128	1399.03	1398.03	0.279922	2.84907	3.14552	4.30837
IT-KKB1 - 47	rim			17.9853	0.302129	Below LOD	230	2.71634	676.374	33.3437	663.963	691.483		0.49	430000	1354	4.51	0.108	Below LOD	26.68	0.054	1.2	3.08	0.9	20.1	7.7	101	43.7	221.5	52.3	550	119.6	9750		1189	1193	0.996647	5.44554	44.1026	0.349698	1123.5	1122.5	0.285937	116.096	115.096	0.118207	3.05019	2.06106	4.34425
IT-KKB1 - 49	inner part			17.867	0.321185	Below LOD	229.5	4.37341	716.881	35.8692	703.397	733.319		0.504	457100	1085	1.41	Below LOD	0.052	10.97	0.108	1.55	3.19	0.788	18.16	6.66	84	35.2	172.8	41.5	432	90.3	9900		288	418	0.688995	5.14286	46.1717	0.316517	286.342	285.342	0.253942	45.7364	44.7364	0.121278	2.45537	1.65066	3.58775
Szentkút, Vadász gödör
LR35_SZVG - 1	interior			14.15	0.165526	Below LOD	991	1.61026	635.553	30.9014	624.18	649.382			435500	1776	4.08	0.193	0.386	9.8	0.245	2	3.66	0.504	27.06	10.46	151.2	59.88	295.9	63.65	569.1	112.1	9360	1.74	168.6	505	0.333861	3.76389	46.5278	0.154828	210.293	209.293	0.115019	419.326	418.326	0.163609	2.32076	2.62152	3.31413
LR35_SZVG - 2	rim			14.257	0.199541	Below LOD	628	2.51945	670.275	32.9723	658.022	685.189			456000	2400	15.33	0.244	0.227	17.21	0.159	1.69	4.25	0.467	33.13	13.73	203.6	82.6	407	88.5	787	154	9460	5.6	387	1039	0.372474	3.86542	48.203	0.120319	500.836	499.836	0.0936465	548.643	547.643	0.111326	2.69883	2.7385	3.81522
LR35_SZVG - 4	rim			14.641	0.230026	Below LOD	337	3.64773	701.048	34.87	687.989	716.96			463000	1316	4.91	0.238	0.0197	13.24	0.0676	1.311	3.56	0.542	23.81	8.57	118.8	45.4	217.5	46.2	407.9	79.5	8160	1.577	180.9	360	0.5025	3.4335	56.7402	0.179978	335.937	334.937	0.157512	312.168	311.168	0.173886	2.52496	2.493	3.72636
LR35_SZVG - 8	rim	high uncertainty	high uncertainty	14.541	7.8388	Below LOD	525	1.33641	621.836	30.1037	610.802	635.247			513000	1796	13.13	0.232	0.0224	9.13	0.0238	0.557	2.37	0.239	19.84	8.71	137.6	59.4	310	71.8	673	133.6	10970	4.8	153.4	636	0.241195	4.89099	46.7639	0.106556	1160.04	1159.04	0.0896032	874.82	873.82	0.0943694	3.0641	2.94142	4.42688
LR35_SZVG - 10	rim			14.529	0.18178	Below LOD	538	2.54136	670.973	33.0147	658.702	685.909			447700	1788	10.58	0.23	0.0227	17.13	0.0558	1.09	3.43	0.451	27.4	10.68	152.7	61.4	298.8	64.7	574	112	9280	3.56	391	774	0.505168	3.759	48.2435	0.142226	695.773	694.773	0.122246	934.49	933.49	0.160582	2.84184	2.97011	4.14211
LR35_SZVG - 13	rim			14.476	0.169785	Below LOD	451.4	3.25338	691.322	34.2638	678.52	706.915			476000	1604	8.84	0.222	0.022	16.3	0.0498	1.037	3.27	0.412	24.48	9.32	133.9	53.7	260.7	57.7	515	98.4	8990	2.903	303	648	0.467593	3.84615	52.9477	0.14078	667.785	666.785	0.12219	377.563	376.563	0.11499	2.82399	2.57584	4.11435
LR35_SZVG - 14	rim			14.383	0.148138	Below LOD	694.6	1.21591	615.04	29.7128	604.172	628.247			453000	2415	17.56	0.234	0.0193	16.75	0.0488	1.023	3.83	0.309	32.7	13.62	203.5	81.2	400	86.9	771	148.5	9990	6.1	495.3	1242	0.398792	3.7887	45.3453	0.0844129	831.938	830.938	0.0730772	600.5	599.5	0.0787674	2.91957	2.77779	4.4057
LR35_SZVG - 16	rim			14.476	0.262809	Below LOD	1027	1.21591	615.04	29.7128	604.172	628.247			482000	2832	12.42	0.266	0.0207	12.11	0.0458	0.956	4.21	0.328	37.77	15.98	237	95.3	477.7	104.9	901	178	10630	4.94	411	1206	0.340796	3.80169	45.3434	0.0795212	679.833	678.833	0.0713417	823.242	822.242	0.0951579	2.83176	2.915	4.42048
LR35_SZVG - 17	interior			14.189	0.149388	Below LOD	511.3	1.40213	625.329	30.3057	614.209	638.846			460000	1640	9.36	0.243	0.0213	10.79	0.0387	0.739	2.64	0.243	21.73	9.11	134.7	55.4	272.9	59.7	532	101.9	10100	4.131	334.2	923	0.36208	3.94952	45.5446	0.098084	752.143	751.143	0.0834117	105.607	104.607	0.0479087	2.87572	2.01956	4.37749
LR35_SZVG - 18	rim			14.536	0.248712	Below LOD	347.1	3.34101	693.564	34.4031	680.703	709.23			463000	1824	4.84	0.242	0.0202	13.55	0.127	2.61	5.88	0.958	34.6	12.2	163.4	62.9	297.4	63.8	556	107.9	8350	1.487	189.9	364	0.521703	3.40269	55.4491	0.205335	151.84	150.84	0.174421	192.426	191.426	0.209831	2.17852	2.282	3.4573
LR35_SZVG - 21	rim			14.214	0.176537	Below LOD	495.2	1.10637	608.352	29.3309	597.646	621.359			456000	1691	13.77	0.248	0.0215	8.21	0.0206	0.446	1.95	0.195	18.45	8.27	128	55.4	294.3	68.2	633	128.3	10110	5.32	145	635	0.228346	4.94531	45.1039	0.09939	1422.19	1421.19	0.083479	492.846	491.846	0.0661581	3.15265	2.69183	4.48891
LR35_SZVG - 24	rim			14.481	0.207946	Below LOD	520.9	5.70711	741.063	37.4253	726.916	758.32			454000	2178	8.58	0.224	0.0271	18.89	0.1477	2.57	6.43	0.947	42.84	15.23	204.4	77.12	353.7	73.3	620	114.4	7610	2.185	436	620.5	0.702659	3.03327	59.6583	0.174439	206.087	205.087	0.153086	425.685	424.685	0.238183	2.31194	2.62807	3.62336
LR35_SZVG - 30	rim			14.975	0.182693	Below LOD	329.7	5.73997	741.597	37.4601	727.436	758.873			432800	1586	4.31	0.17	0.0267	7.86	0.1	1.89	4.59	0.822	28.3	10.34	139.6	55.1	261.8	55.3	489	94.8	6675	1.094	106	244.9	0.43283	3.50287	64.839	0.220494	133.127	132.127	0.186962	214.796	213.796	0.249952	2.12099	2.33	3.38899
LR35_SZVG - 32	rimof33	disc, inclusion; high uncertainity	disc, inclusion; high uncertainity	14.484	1.0472	Below LOD	422	4.04208	709.944	35.4294	696.646	726.149			506000	2200	8.59	0.242	0.0315	12.06	0.102	1.977	5.15	0.814	33.8	13.41	183.2	75.8	373	82.4	723	137.4	9660	2.77	183	512	0.357422	3.94651	52.381	0.188619	245.091	244.091	0.154531	295.728	294.728	0.188624	2.38755	2.46942	3.70067
LR35_SZVG - 33	rimof32			14.21	0.135019	Below LOD	619.3	3.54914	698.701	34.7232	685.704	714.536			449100	2608	16.33	0.236	0.0242	23.54	0.1019	2.06	6.58	1.007	49.9	18.24	242.7	91.8	432	90.3	764	143.3	8660	4.5	913	1254	0.72807	3.14792	51.8591	0.169899	363.768	362.768	0.156841	793.725	792.725	0.256429	2.55963	2.89912	4.09012
LR35_SZVG - 36	rim			14.317	0.140911	Below LOD	749	1.56644	633.496	30.781	622.175	647.262			485000	2795	18.34	0.269	0.0306	18.02	0.053	1.065	4.19	0.362	39.5	16.25	238.4	95.1	471	103.8	884	171.4	10810	7.62	491	1488	0.329973	3.70805	44.8659	0.0860254	876.762	875.762	0.0760053	358.323	357.323	0.0675379	2.94239	2.55306	4.44833
LR35_SZVG - 39	rim			14.925	0.189248	Below LOD	171.5	2.84808	680.253	33.5811	667.741	695.487			452600	716	1.98	0.207	0.0182	8.26	0.0408	0.486	1.208	0.324	7.16	2.85	43.8	20.1	117.7	31.4	337	77.3	8116	1.217	236.4	628	0.376433	7.69406	55.7664	0.336805	1393.03	1392.03	0.24817	175.511	174.511	0.101695	3.14365	2.24182	4.1873
LR35_SZVG - 40	rim	high uncertainity	high uncertainity	14.928	0.619543	Below LOD	319.3	7.61313	768.61	39.2423	753.69	786.825			512000	1558	5.75	0.287	0.0207	7.41	0.0659	1.28	3.33	0.675	23.88	9.1	127.4	52.4	262.8	58.4	523	102.2	7690	1.529	100.3	294.8	0.340231	4.10518	66.58	0.231413	252.459	251.459	0.190259	289.936	288.936	0.224365	2.40047	2.4608	3.65064
LR35_SZVG - 41	rim					Below LOD	202	1.76362	642.401	31.3039	630.857	656.44			475000	768	2.48	0.243	0.0242	5.19	0.0207	0.39	1.22	0.179	9.63	3.99	60.9	25.3	129.6	30.1	277	55.2	9650	1.17	55.6	208	0.267308	4.54844	49.2228	0.159655	786.586	785.586	0.128923	366.847	365.847	0.109138	2.89519	2.5633	4.00209
LR35_SZVG - 43	rim			15.14	0.239541	Below LOD	223	7.65695	769.174	39.2799	754.238	787.409			459800	656	1.208	0.22	0.02	6.87	0.0287	0.55	1.425	0.232	9.46	3.57	51	20.35	104.4	23.75	218.5	44.4	8590	0.73	98.3	223.6	0.439624	4.28431	53.5274	0.193178	551.228	550.228	0.158773	296.533	295.533	0.134394	2.74054	2.47061	3.89159
LR35_SZVG - 48	interior			14.861	0.225633	Below LOD	252.4	6.67107	755.799	38.3914	741.241	773.565			494000	756	1.744	0.226	0.022	8.02	0.0329	0.544	1.54	0.263	10.02	4.04	58	23.43	121	28.2	263.4	52.9	9160	1.145	112.5	257	0.437743	4.54138	53.9301	0.204685	715.246	714.246	0.166948	214.743	213.743	0.114054	2.85385	2.32989	3.89274
LR35_SZVG - 50	rim			14.822	0.194906	Below LOD	501	2.32228	663.758	32.5779	651.673	678.465			460000	1864	13.16	0.242	0.036	13.22	0.0669	1.17	3.69	0.353	28.6	11.11	162.4	64	310	65.3	577	109.8	9420	4.14	289	735	0.393197	3.55296	48.8323	0.105051	471.407	470.407	0.0905887	644.093	643.093	0.121921	2.67247	2.80827	4.04086
LR35_SZVG - 51	rim			14.01	0.181593	Below LOD	620	3.54914	698.701	34.7232	685.704	714.536			464000	2055	12.09	0.24	0.0221	23.58	0.0786	1.49	4.22	0.549	32.1	12.39	179.1	71.4	343	74.7	684	131.1	8660	3.4	369.5	763	0.484273	3.8191	53.5797	0.144207	682.389	681.389	0.120913	774.213	773.213	0.146275	2.8334	2.8883	3.9871
LR35_SZVG - 52	rim			14.615	0.183291	Below LOD	419.3	1.81839	644.726	31.4413	633.124	658.838			456000	1556	9.63	0.228	0.0195	11.54	0.0341	0.735	2.63	0.293	20.8	8.62	128.4	52.7	263	58.6	532	103.3	9600	3.475	212.1	606.6	0.349654	4.1433	47.5	0.12111	824.543	823.543	0.103098	468.496	467.496	0.0981038	2.91569	2.66978	4.25015
LR35_SZVG - 55	rimof54			14.746	0.24456	Below LOD	912	1.04064	604.067	29.0877	593.464	616.947			499000	2710	9.63	0.241	0.0285	10.59	0.039	0.923	4.03	0.305	36.2	15.2	230	93.1	459	100.1	872	171.4	10980	3.65	295	975	0.302564	3.7913	45.4463	0.0771999	619.572	618.572	0.0689642	766.259	765.259	0.0927518	2.79139	2.88381	4.39794
Tar, Gömör-hill
LR_15_TAR-Gh-1 - 1	rim	disc.		15.58	0.24615	Below LOD	210	7.37599	765.512	39.0356	750.68	783.618		0.67	452300	828	1.66	Below LOD	Below LOD	11.03	0.038	0.52	1.81	0.351	13.5	4.79	64.4	26.56	128.4	29.23	289	57.2	10400		227.4	442	0.51448	4.48758	43.4904	0.217082	901.732	900.732	0.200817	391.476	390.476	0.161307	2.9546	2.59159	4.06564
LR_15_TAR-Gh-1 - 2	inner part	?young		14.3451	0.281466	Below LOD	192	5.12807	731.203	36.7864	717.328	748.123		0.428	464200	815	1.91	Below LOD	Below LOD	11.4	0.05	0.81	1.82	0.351	12	4.44	59	25.1	127	30.7	312	62.2	10090		409	623	0.656501	5.28814	46.0059	0.229617	668.473	667.473	0.18342	684.032	683.032	0.186759	2.82443	2.83444	4.09552
LR_15_TAR-Gh-1 - 3	rim			15.411	0.343655	Below LOD	212	6.41594	752.077	38.1461	737.624	769.714		0.48	482700	878	2.06	Below LOD	Below LOD	11.34	0.035	0.714	1.92	0.308	13.3	5.28	68.8	28.6	137.3	31.74	309	59.4	10580		268	467	0.573876	4.49128	45.6238	0.186336	687.868	686.868	0.155125	1192.47	1191.47	0.208511	2.83687	3.07608	4.12525
LR_15_TAR-Gh-1 - 4	rim of 5			14.7794	0.271585	Below LOD	137	4.46072	718.637	35.981	705.106	735.134		0.387	466900	637	1.76	Below LOD	Below LOD	10.06	0.033	0.65	1.31	0.339	8.75	3.32	45.1	19.2	100.2	24.8	262	55.7	9840		508	687	0.739447	5.80931	47.4492	0.306114	856.641	855.641	0.231724	256.318	255.318	0.139724	2.93229	2.40708	4.31844
LR_15_TAR-Gh-1 - 5	rim of 4			15.3197	0.290354	Below LOD	182.7	7.5399	767.662	39.1789	752.769	785.844		0.448	468600	678	1.15	Below LOD	Below LOD	6.72	0.026	0.525	1.52	0.297	10.56	4.01	53.8	22.01	106.9	24.75	241.6	47.27	9810		97.5	218.1	0.447043	4.49071	47.7676	0.226635	552.709	551.709	0.194595	266.839	265.839	0.160335	2.74171	2.42462	3.92368
LR_15_TAR-Gh-1 - 6	rim			15.3738	0.356829	Below LOD	141	7.17696	762.849	38.8583	748.092	780.862		0.37	486000	600	1.26	Below LOD	0.018	7.94	0.0173	0.49	1.42	0.268	9.3	3.63	48	20.25	95.6	22.09	219.2	41.3	10450		120.8	283.1	0.426704	4.56667	46.5072	0.225462	682.113	681.113	0.192193	193.785	192.785	0.130891	2.83322	2.28507	4.21389
LR_15_TAR-Gh-1 - 8	rim			15.2531	0.317694	Below LOD	95.2	5.28027	733.879	36.9592	719.931	750.891		0.42	471000	461.3	0.85	Below LOD	Below LOD	4.73	0.0229	0.397	0.81	0.215	5.57	2.195	30.69	13.69	75.5	19.88	221	49.71	9250		109.2	288.8	0.378116	7.20104	50.9189	0.309451	880.97	879.97	0.224498	241.315	240.315	0.123677	2.94447	2.38078	4.10076
LR_15_TAR-Gh-1 - 10	rim of 13			15.1582	0.335403	Below LOD	174	6.52131	753.628	38.2482	739.132	771.319		0.463	489000	763	1.72	0.1	Below LOD	9.99	0.027	0.76	1.98	0.277	12.01	4.42	59.5	24.81	120.9	27.87	270.6	52.4	10770		165	356.2	0.463223	4.5479	45.4039	0.17366	520.945	519.945	0.146577	454.37	453.37	0.14765	2.71596	2.65645	4.12033
LR_15_TAR-Gh-1 - 12	rim			14.7826	0.183132	Below LOD	201	5.57297	738.854	37.2816	724.769	756.035		0.682	465100	1700	2.75	Below LOD	Below LOD	12.4	0.102	2.3	4.71	0.81	28.2	10.5	131	54.8	260	61.5	603	118	9560		381	666	0.572072	4.60305	48.6506	0.214869	200.891	199.891	0.172749	144.951	143.951	0.155904	2.30079	2.15821	3.81487
LR_15_TAR-Gh-1 - 13	core of 10			15.1753	0.403279	Below LOD	188	7.37599	765.512	39.0356	750.68	783.618		0.8	515000	1669	1.23	Below LOD	0.025	12.95	0.128	2.43	6.49	0.742	36.6	12.02	151.1	57.5	256.3	56.4	515	93.2	11310		290.2	450	0.644889	3.40834	45.5349	0.147185	128.478	127.478	0.138316	484.995	483.995	0.256894	2.10543	2.68484	3.546
LR_15_TAR-Gh-1 - 15	rim			14.9885	0.440576	Below LOD	166.1	10.6893	803.035	41.5794	787.12	822.485		0.394	469700	546	0.84	Below LOD	Below LOD	6.77	0.0216	0.403	1.31	0.227	9.07	3.31	43.8	17.89	83.9	19.3	188	36.4	9800		87.5	172.8	0.506366	4.29224	47.9286	0.201331	657.465	656.465	0.182969	126.923	125.923	0.108536	2.81721	2.10011	3.90309
LR_15_TAR-Gh-1 - 16	rim of 18			15.6652	0.297793	Below LOD	200.7	7.08329	761.574	38.7737	746.854	779.543		0.54	464000	788	1.47	Below LOD	Below LOD	8.5	0.0318	0.64	1.83	0.266	12.12	4.59	60.4	25.84	122.3	28.29	277.1	55.49	10070		140.8	302	0.466225	4.58775	46.0775	0.172675	563.553	562.553	0.148092	444.982	443.982	0.144301	2.75016	2.64737	3.97758
LR_15_TAR-Gh-1 - 18	core of 16, 19	?young		14.511	0.312454	Below LOD	274	7.03646	760.932	38.7311	746.23	778.878		0.54	465500	1632	2.54	Below LOD	0.054	14.07	0.116	2.1	4.69	0.604	28	10.3	130.6	52.8	253	54.4	525	99	10320		330	546	0.604396	4.01991	45.1066	0.161137	219.307	218.307	0.134414	155.646	154.646	0.126985	2.33907	2.18934	3.67273
LR_15_TAR-Gh-1 - 19	rim of 18			14.813	0.263068	Below LOD	246	5.98275	745.472	37.7129	731.203	762.88		0.56	463000	1189	3.32	0.069	0.0121	13.24	0.048	0.84	2.38	0.34	16.69	6.72	89	38.92	190.8	44.79	440.1	87	10250		278.6	563.4	0.494498	4.94494	45.1707	0.164925	784.078	783.078	0.135936	916.602	915.602	0.155004	2.8938	2.96171	4.06958
LR_15_TAR-Gh-1 - 20	rim			16.7228	0.321582	Below LOD	144.9	4.2851	715.076	35.7544	701.64	731.453		0.355	474800	604.2	1.55	Below LOD	Below LOD	9.43	0.047	0.76	1.19	0.325	8.19	3.329	41.97	18.15	93.5	23.89	258.1	53.6	9860		470	657	0.715373	6.14963	48.1542	0.318267	715.064	714.064	0.222243	166.85	165.85	0.119517	2.85374	2.21972	4.14547
LR_15_TAR-Gh-1 - 21	rim			14.817	0.243653	Below LOD	245	5.84225	743.246	37.5675	729.039	760.578		0.431	467900	1168	3.67	0.065	Below LOD	12.02	0.0322	0.8	2.34	0.338	16.31	6.41	88	37.76	187.4	44.47	450.4	90.3	10060		236.5	552.3	0.428209	5.11818	46.5109	0.167265	776.853	775.853	0.139074	932.352	931.352	0.157184	2.88978	2.96911	4.23432
LR_15_TAR-Gh-1 - 22	rim of 27			15.0175	0.21194	Below LOD	149.4	4.77683	724.769	36.3727	711.07	741.471		0.501	465000	883	2.92	Below LOD	Below LOD	9.75	0.0357	0.72	1.3	0.403	8.83	3.53	52.6	25.76	144.1	40.1	459	102.5	9260		282.9	748	0.378209	8.72624	50.216	0.363644	1282.74	1281.74	0.243209	623.477	622.477	0.161012	3.1078	2.79412	4.32123
LR_15_TAR-Gh-1 - 23	rim			15.7219	0.30339	Below LOD	155.2	5.38564	735.696	37.0768	721.697	752.769		0.52	466000	795	1.5	Below LOD	0.028	8.8	0.052	0.91	2.15	0.373	12.58	4.68	60.1	25.36	126.9	30.73	319.7	64.9	9700		289	531	0.544256	5.31947	48.0412	0.219267	418.233	417.233	0.179931	150.121	149.121	0.120117	2.62038	2.17354	4.00909
LR_15_TAR-Gh-1 - 24	rim			15.1258	0.243553	Below LOD	205.1	6.00616	745.838	37.7369	731.559	763.26		0.69	458300	1836	1.5	Below LOD	Below LOD	13.16	0.124	2.6	6.43	0.846	36.8	12.72	158.4	62.6	279	60.7	560	101.7	10460		355	526	0.674905	3.53535	43.8145	0.168138	132.265	131.265	0.150898	632.214	631.214	0.304829	2.11815	2.80018	3.62756
LR_15_TAR-Gh-1 - 25	rim			16.2396	0.380361	Below LOD	174	9.79953	794.004	40.9591	778.353	813.126		0.384	462300	585.9	1.07	0.074	0.082	8.55	0.039	0.61	1.37	0.259	9.91	3.639	47.4	19.3	89.6	20.53	199.7	37.96	9940		105.2	207.2	0.507722	4.21308	46.5091	0.214895	545.157	544.157	0.176883	243.411	242.411	0.141299	2.73572	2.38455	3.72533
LR_15_TAR-Gh-1 - 26	rim			15.0922	0.221997	Below LOD	123.2	3.33676	693.456	34.3964	680.598	709.119		0.49	465100	555	1.34	Below LOD	Below LOD	9.26	0.0216	0.64	1.2	0.331	7.17	2.84	38.1	16.61	86.1	22.5	251	54.1	9640		425	698	0.608883	6.58793	48.2469	0.344986	857.291	856.291	0.251109	420.232	419.232	0.172821	2.93262	2.62245	4.5094
LR_15_TAR-Gh-1 - 27	core of 22			15.0222	0.333237	Below LOD	194	6.54473	753.97	38.2708	739.464	771.673		0.79	482600	1600	1.1	Below LOD	Below LOD	11.1	0.126	2.55	5.6	0.919	31.5	11	135	54.4	242	53.3	498	92.4	10090		292	447	0.653244	3.68889	47.8295	0.211539	117.335	116.335	0.182938	319.088	318.088	0.289427	2.06571	2.50255	3.54994
LR_15_TAR-Gh-1 - 28	core of 30			15.1848	0.38545	Below LOD	181	7.14183	762.372	38.8267	747.63	780.369		0.48	498700	1108	1.52	Below LOD	Below LOD	9.29	0.072	1.32	3.25	0.505	20.8	7.21	91.4	36.3	169	38.5	358	67.3	10790		189	335	0.564179	3.91685	46.2187	0.187777	222.419	221.419	0.165076	743.892	742.892	0.285358	2.34521	2.87093	3.66771
LR_15_TAR-Gh-1 - 29	rim			14.7124	0.335481	Below LOD	195	7.21208	763.323	38.8899	748.553	781.353		0.43	473700	780	1.52	0.07	Below LOD	9.5	0.0255	0.67	1.92	0.303	11.97	4.54	60.3	24.94	123.3	28.21	278.6	54.66	10550		170.1	360	0.4725	4.62023	44.9005	0.193227	585.776	584.776	0.1659	821.988	820.988	0.200651	2.76699	2.91434	4.14976
LR_15_TAR-Gh-1 - 34	rim			15.1888	0.389858	Below LOD	171.5	9.38975	789.621	40.6599	774.097	808.585		0.397	472600	584	1.13	Below LOD	Below LOD	8.2	0.015	0.5	1.24	0.233	9.74	3.55	47	19.15	88.9	20.36	196.6	37.93	10280		99	202.9	0.487925	4.18298	45.9728	0.204969	674.642	673.642	0.172675	663.911	662.911	0.188845	2.82843	2.82146	4.13119
LR_15_TAR-Gh-1 - 35	rim	?young		14.2063	0.383029	Below LOD	288	7.32916	764.89	38.9942	750.076	782.975		0.41	453000	1178	2.8	Below LOD	Below LOD	14.14	0.079	1.34	2.95	0.5	20.14	7.34	94.9	39.4	181.4	40.21	382.5	75	9480		403.1	573	0.70349	4.03056	47.7848	0.198314	384.133	383.133	0.163439	478.76	477.76	0.190729	2.58335	2.67921	3.86053
LR_15_TAR-Gh-1 - 38	rim			14.7268	0.221271	Below LOD	219	6.57985	754.481	38.3045	739.961	772.202		0.67	462600	1330	3.92	Below LOD	Below LOD	14.54	0.058	0.88	2.63	0.452	16.98	6.79	92.6	41.58	215	53.5	551	111.8	9560		352	762	0.461942	5.95032	48.3891	0.206783	954.093	953.093	0.169496	717.769	716.769	0.155141	2.97914	2.85538	4.11853
LR_15_TAR-Gh-1 - 39	core of 46			15.21	0.46194	Below LOD	240	15.2203	841.385	44.2701	824.325	862.26		0.88	499000	1669	3.43	0.127	Below LOD	15	0.111	2.25	4.97	0.591	29.8	11.14	138	55.7	262.4	58.5	565	105	10780		331	610	0.542623	4.0942	46.2894	0.148465	218.372	217.372	0.123484	292.48	291.48	0.148432	2.3372	2.46461	3.74001
LR_15_TAR-Gh-1 - 44	rim			14.7976	0.213832	Below LOD	218.3	6.52131	753.628	38.2482	739.132	771.319		0.5	471600	972	2.47	Below LOD	Below LOD	11.48	0.0404	0.88	2.35	0.395	15.34	5.8	75.9	31.6	152.8	35.78	358.9	70	9910		323.6	561	0.576827	4.72859	47.5883	0.201129	550.969	549.969	0.169942	284.108	283.108	0.139696	2.74034	2.45195	4.14258
LR_15_TAR-Gh-1 - 46	rim of 39			14.9394	0.286844	Below LOD	201.9	7.32916	764.89	38.9942	750.076	782.975		0.42	466400	721	1.48	0.07	Below LOD	8.79	0.0375	0.622	1.6	0.211	11.55	4.51	56.1	23.66	111.8	25.46	250.5	47.73	10350		147	322	0.456522	4.46524	45.0628	0.150057	584.048	583.048	0.125685	471.943	470.943	0.126911	2.7657	2.67297	3.93382
LR_15_TAR-Gh-1 - 47	rim of 37			14.7233	0.279683	Below LOD	242	8.97998	785.08	40.3512	769.688	803.881		0.63	499000	1636	3.39	0.064	Below LOD	13.08	0.131	1.83	3.81	1.05	25.07	9.44	125.7	54.9	256.8	60.09	605	116.9	8300		559	802	0.697007	4.81305	60.1205	0.328453	313.167	312.167	0.256854	613.651	612.651	0.343851	2.49439	2.78721	3.7869
LR_15_TAR-Gh-1 - 49	rim			15.0874	0.307027	Below LOD	347	6.09983	747.294	37.8322	732.975	764.766		0.638	476300	927	1.43	Below LOD	Below LOD	7.68	0.0273	0.65	1.77	0.311	13.58	5.34	71.6	30.22	145.6	33.97	333.1	64.69	10680		136.6	313.5	0.435726	4.65223	44.5974	0.193931	573.518	572.518	0.160122	788.596	787.596	0.197875	2.75779	2.8963	4.06007
LR_15_TAR-Gh-1 - 51	rim			15.4467	0.313106	Below LOD	227.9	8.82777	783.351	40.234	768.009	802.09		0.65	498000	1889	1.79	0.115	Below LOD	10.93	0.165	3.21	6.93	0.927	39.9	14.06	164.3	65.4	283.9	61.53	577	103.1	10010		305.3	475.7	0.641791	3.51187	49.7502	0.170432	83.7957	82.7957	0.149094	121.206	120.206	0.190213	1.91801	2.07992	3.45985
LR_15_TAR-Gh-1 - 52	rim			15.2788	0.315322	Below LOD	195	6.53302	753.799	38.2595	739.298	771.496		0.391	468500	803	1.96	0.1	Below LOD	10.11	0.036	0.69	1.74	0.241	12.5	4.79	63.2	26.7	128	29.52	292	56.58	10440		195.1	385.4	0.506227	4.62025	44.8755	0.157983	654.445	653.445	0.129986	247.582	246.582	0.0969047	2.81521	2.39196	4.02961
LR_15_TAR-Gh-1 - 53	rim			15.2781	0.341439	Below LOD	121	5.24515	733.267	36.9197	719.336	750.258		0.61	479800	1063	1.17	Below LOD	0.057	8.23	0.151	1.86	3.21	0.85	16.44	6.09	76.2	32.9	167	43.3	460	97.2	9520		362	640	0.565625	6.03675	50.3992	0.357717	196.313	195.313	0.269526	208.61	207.61	0.24734	2.29073	2.31725	3.6272
Tar, Fehérkő quarry
LR_15_TAR-3 - 4	core/inner part			15.171	0.361825	Below LOD	323	6.90767	759.148	38.6129	744.496	777.032		0.478	462500	1049	1.35	Below LOD	Below LOD	6.19	0.0265	0.66	2.31	0.3	15.1	6.12	81.9	34.8	171	40.7	408	78.9	10130		122.1	381	0.320472	4.98168	45.6565	0.155292	449.714	448.714	0.135745	526.5	525.5	0.157107	2.65197	2.72057	4.15768
LR_15_TAR-3 - 6	rim			14.768	0.229855	Below LOD	205	6.09983	747.294	37.8322	732.975	764.766		0.55	462500	1657	1.72	Below LOD	0.023	11.89	0.113	2.66	5.34	0.857	31.4	11.37	138.1	56.2	255.9	57.6	556	104.7	9950		370	580	0.637931	4.02607	46.4824	0.202334	136.619	135.619	0.16731	784.717	783.717	0.341969	2.13232	2.89416	3.71035
LR_15_TAR-3 - 7	rim			15.096	0.303329	Below LOD	194	6.91938	759.311	38.6237	744.655	777.201		0.406	463100	741	1.49	0.071	Below LOD	8.06	0.023	0.509	1.67	0.254	11.4	4.41	58.9	24.55	118.5	27.79	277.5	54.65	10030		123.6	283.3	0.436287	4.71138	46.1715	0.17797	712.8	711.8	0.156606	557.888	556.888	0.154603	2.85236	2.74577	4.09052
LR_15_TAR-3 - 8	rim			15.299	0.203677	Below LOD	112.9	3.78166	704.154	35.0648	691.012	720.168		0.36	465800	477	0.98	Below LOD	Below LOD	7.3	0.0271	0.317	1.07	0.265	6.1	2.265	30.58	14.53	77.4	20.61	233.3	49.8	9660		258.6	573.7	0.450758	7.62917	48.2195	0.317112	1447.81	1446.81	0.272449	699.589	698.589	0.193274	3.16041	2.84422	4.32572
LR_15_TAR-3 - 9	core/inner part			14.919	0.243057	Below LOD	380	6.63839	755.328	38.3603	740.784	773.079		0.607	466300	1562	2.11	Below LOD	0.06	11.81	0.111	2.01	4.39	0.68	27.3	10.11	128.3	51.9	244	54.8	530	101.2	9990		309	540	0.572222	4.13094	46.6767	0.189897	203.209	202.209	0.15664	209.886	208.886	0.168721	2.3058	2.31991	3.68707
LR_15_TAR-3 - 11	rim			14.812	0.32334	Below LOD	158.1	6.52131	753.628	38.2482	739.132	771.319		0.375	460700	598.7	1.22	Below LOD	Below LOD	8.32	0.02	0.369	1.22	0.207	9.75	3.62	47.21	19.63	92.9	21.99	214.6	41.23	10270		112.9	258.3	0.437089	4.54565	44.8588	0.18349	1006.64	1005.64	0.165292	236.704	235.704	0.107248	3.00244	2.37237	4.11109
LR_15_TAR-3 - 13	rim			15.515	0.289482	Below LOD	202.2	7.45795	766.592	39.1075	751.729	784.736		0.428	465500	1022	1.48	Below LOD	Below LOD	9.94	0.075	1.35	2.74	0.404	18.9	6.91	84.6	34.9	158.9	35.4	335.5	63.3	10110		202.4	372.1	0.54394	3.96572	46.0435	0.171632	248.627	247.627	0.140619	45.5078	44.5078	0.0803409	2.3938	1.64844	3.6956
LR_15_TAR-3 - 15	core/inner part			14.835	0.269047	Below LOD	141.6	5.45589	736.89	37.1542	722.859	754.004		0.456	466500	821	1.4	Below LOD	Below LOD	8.21	0.034	0.96	1.6	0.499	10.83	4.07	57.1	25	131.7	33.6	356	75.8	8960		321	586	0.547782	6.23468	52.0647	0.36648	524.066	523.066	0.259477	270.171	269.171	0.187069	2.71856	2.43003	4.23642
LR_15_TAR-3 - 16	rim			14.986	0.210241	Below LOD	129	4.17973	712.881	35.6152	699.504	729.184		0.428	464900	577	1.24	Below LOD	Below LOD	8.39	0.0363	0.584	1.28	0.314	7.46	2.74	38.7	17.31	91.2	24.6	273	58.5	9580		310	589	0.526316	7.05426	48.5282	0.310655	883.901	882.901	0.237762	227.81	226.81	0.12859	2.94591	2.35566	4.21021
LR_15_TAR-3 - 17	rim			15.22	0.38344	Below LOD	81	5.13978	731.411	36.7998	717.531	748.338		0.329	463400	441	0.58	Below LOD	Below LOD	4.77	0.0139	0.276	0.8	0.17	6.1	2.39	32.5	15	66	16.5	174	34.8	10080		77	191	0.403141	5.35385	45.9722	0.235268	953.627	952.627	0.194545	296.44	295.44	0.131523	2.97892	2.47047	4.13802
LR_15_TAR-3 - 18	rim			15.203	0.269859	Below LOD	156	6.5096	753.457	38.2369	738.965	771.142		0.52	447700	602	1.18	Below LOD	Below LOD	8.75	0.018	0.52	1.25	0.279	8.3	3.4	45.2	19.46	95.6	22.53	231.7	47.9	9860		234	436	0.536697	5.12611	45.4057	0.26481	858.001	857.001	0.20744	574.147	573.147	0.180639	2.93298	2.75827	4.38421
LR_15_TAR-3 - 19	rim			15.076	0.276147	Below LOD	206	6.19349	748.732	37.9264	734.372	766.253		0.56	485100	823	1.87	Below LOD	Below LOD	11.26	0.0228	0.71	1.84	0.271	13.48	5.15	66.6	27.97	132	30.22	293.3	54.9	10490		220.9	420.3	0.525577	4.4039	46.244	0.166356	663.526	662.526	0.139392	394.217	393.217	0.127102	2.8212	2.59463	4.26562
LR_15_TAR-3 - 22	core/inner part			15.077	0.300965	Below LOD	211.8	5.73688	741.547	37.4568	727.387	758.821		0.284	483100	936	2.64	Below LOD	Below LOD	13.33	0.044	0.93	2.12	0.389	14.43	5.61	70.8	30.81	147	35.7	358	68.7	10840		478	801	0.596754	5.0565	44.5664	0.215017	650.128	649.128	0.171973	196.869	195.869	0.114498	2.81233	2.29197	4.26018
LR_15_TAR-3 - 23	rim			15.589	0.276495	Below LOD	208.5	7.75064	770.371	39.36	755.401	788.648		0.376	464000	924	2.14	Below LOD	Below LOD	9.2	0.04	0.81	2.03	0.33	14.56	5.56	71.8	30.72	149.1	35.1	345	69.4	9860		148	352	0.420455	4.80501	47.0588	0.18557	521.633	520.633	0.152736	392.245	391.245	0.144138	2.71653	2.59245	3.94448
LR_15_TAR-3 - 24	core/inner part of 26			15.07	0.296609	Below LOD	244	6.42765	752.25	38.1575	737.792	769.893		0.296	460600	1088	1.06	Below LOD	Below LOD	8.3	0.071	1.4	3.3	0.387	20.4	7.22	91.4	37.2	167.8	37.16	357.5	65.3	10020		174.3	304.4	0.572602	3.91138	45.9681	0.144199	183.331	182.331	0.124437	685.477	684.477	0.22544	2.26086	2.83536	3.63219
LR_15_TAR-3 - 25	rim			15.218	0.296032	Below LOD	220	6.45106	752.596	38.1803	738.129	770.251		0.55	458000	1273	1.37	Below LOD	Below LOD	10.03	0.083	1.74	4.05	0.514	23.1	8.45	105.7	43.8	199	44.2	423	77.9	10110		227	384	0.591146	4.00189	45.3017	0.162463	178.075	177.075	0.138091	370.348	369.348	0.197881	2.24816	2.56744	3.66525
LR_15_TAR-3 - 26	rim			14.808	0.26938	Below LOD	204	5.21002	732.652	36.8799	718.738	749.622		0.425	464000	978	2.71	Below LOD	Below LOD	13.39	0.0361	0.81	2.31	0.335	14.85	5.76	76.3	31.89	153.6	35.45	344.6	66.1	10490		262.2	508.3	0.515837	4.51638	44.2326	0.174864	687.931	686.931	0.14877	496.485	495.485	0.143063	2.83691	2.69503	4.14861
LR_15_TAR-3 - 28	rim2 of 27			14.95	0.301182	Below LOD	130.3	4.61292	721.633	36.1721	708.019	738.229		0.43	468000	640	1.58	Below LOD	Below LOD	10.07	0.0273	0.62	1.29	0.325	9.33	3.46	47.6	20.28	103.2	25.52	275.4	54.4	10350		440.4	724	0.608287	5.78571	45.2174	0.286399	898.691	897.691	0.220025	242.112	241.112	0.132985	2.95313	2.38222	4.42358
LR_15_TAR-3 - 29	rim			15.341	0.309915	Below LOD	160.6	6.75547	757.004	38.471	742.413	774.813		0.436	468900	606.8	1.15	Below LOD	Below LOD	8.44	0.0176	0.393	1.39	0.208	9.58	3.67	48.62	19.99	95.6	22	219.3	42.48	10580		119	272.6	0.436537	4.51049	44.3195	0.17426	911.179	910.179	0.158298	514.403	513.403	0.141114	2.95913	2.71046	4.19001
LR_15_TAR-3 - 30	rim	few common-Pb		14.944	0.394064	Below LOD	239	6.9428	759.637	38.6453	744.972	777.538		0.47	485000	898	2.19	Below LOD	0.18	10.86	0.115	1.18	2.14	0.348	13.96	5.27	71.9	29.84	138.9	32.42	319.7	60.3	10280		213.3	432.4	0.493293	4.44645	47.179	0.194649	379.751	378.751	0.147089	601.71	600.71	0.183163	2.57835	2.77867	3.57519
LR_15_TAR-3 - 31	rim			15.127	0.255333	Below LOD	124	2.6577	674.596	33.2352	662.232	689.649		0.57	484000	870	2	Below LOD	0.137	9.9	0.098	1.09	1.73	0.475	11.5	4.5	60.6	26.8	142	37.6	413	87	10300		443	793	0.558638	6.81518	46.9903	0.325571	586.258	585.258	0.225164	235.923	234.923	0.144667	2.76735	2.37093	3.90805
LR_15_TAR-3 - 32	rim			14.872	0.373402	Below LOD	168	4.46072	718.637	35.981	705.106	735.134		0.44	490000	850	2.46	0.099	Below LOD	12.84	0.041	0.69	1.57	0.366	11.53	4.61	61.7	27.21	140.9	35.61	385.3	77.6	11320		280.4	624	0.449359	6.24473	43.2862	0.262991	1166.76	1165.76	0.200398	1192.38	1191.38	0.200202	3.06661	3.07605	4.1824
LR_15_TAR-3 - 33	rim			15.2	0.290132	Below LOD	105.5	3.60604	700.062	34.8082	687.029	715.941		0.335	464700	704	0.69	Below LOD	Below LOD	6.15	0.048	0.69	1.86	0.411	11.41	4.23	55.2	23.48	111.6	26.92	275.8	55	10020		144	282	0.510638	4.99638	46.3772	0.272751	375.933	374.933	0.232343	322.039	321.039	0.224215	2.57395	2.50656	3.76901
LR_15_TAR-3 - 34	rim			14.974	0.27037	Below LOD	187	8.39458	778.294	39.8922	763.097	796.852		0.445	461400	682	1.47	Below LOD	Below LOD	9.47	0.0228	0.514	1.75	0.237	11.28	4.23	55.7	22.16	105.4	24.15	234.7	45.22	10330		136.2	293.2	0.464529	4.21364	44.666	0.163079	690.706	689.706	0.149595	334.651	333.651	0.125846	2.83866	2.52329	4.10923
LR_15_TAR-3 - 35	rim			15.389	0.512973	Below LOD	71.6	4.61292	721.633	36.1721	708.019	738.229		0.47	501000	346.2	0.64	Below LOD	Below LOD	5.21	0.0124	0.27	0.67	0.202	3.91	1.598	22.85	10.59	56.5	15.47	176.7	37	10160		127.6	342.9	0.37212	7.73304	49.311	0.381548	1414.53	1413.53	0.28581	397.068	396.068	0.162506	3.1503	2.59777	4.44175
LR_15_TAR-3 - 36	core/inner part of 35			14.875	0.4281	Below LOD	144	6.72035	756.504	38.438	741.927	774.295		0.5	482800	922	0.99	Below LOD	Below LOD	8.32	0.03	0.91	2.56	0.454	17.2	6.3	80.5	31.4	143	33.2	314	57.7	10790		155	275	0.563636	3.90062	44.7451	0.209168	306.305	305.305	0.186817	187.905	186.905	0.174902	2.48473	2.27162	3.96221
LR_15_TAR-3 - 40	rim			15.452	0.263496	Below LOD	177.6	5.04611	729.735	36.6918	715.9	746.605		0.348	457700	757	2.51	0.092	Below LOD	8.88	0.0202	0.566	1.44	0.285	11.04	4.28	57.52	24.67	120.3	29.01	296.5	57.8	9880		140.4	341.5	0.411127	5.15473	46.3259	0.218526	822.582	821.582	0.176525	691.196	690.196	0.175137	2.91465	2.83897	4.22804
LR_15_TAR-3 - 42	core/inner part			14.871	0.242917	Below LOD	117.6	3.5475	698.662	34.7207	685.666	714.495		0.48	455100	879	1.1	Below LOD	0.0062	7.35	0.084	1.35	2.5	0.599	13.48	4.76	63.6	27.3	140.8	36.8	403	85.8	9320		285	583	0.488851	6.33648	48.8305	0.315454	265.112	264.112	0.241485	93.5849	92.5849	0.145173	2.42179	1.96654	3.84139
LR_15_TAR-3 - 43	core/inner part of 41			14.818	0.216547	Below LOD	150.9	2.40012	666.384	32.7365	654.231	681.174		0.66	461000	980	0.87	Below LOD	Below LOD	7.73	0.114	1.88	2.9	0.752	15.19	5.66	70.8	30.39	155.3	40.2	439	91.9	9570		373	676	0.551775	6.20056	48.1714	0.346389	188.438	187.438	0.252208	220.415	219.415	0.236904	2.27286	2.34127	3.77304
LR_15_TAR-3 - 47	core/inner part of 46			15.273	0.315216	Below LOD	453	5.88908	743.992	37.6163	729.765	761.35		1.05	474000	1320	1.47	Below LOD	2.13	13.3	0.56	3.68	4.29	0.71	24.9	8.76	108.4	44.8	206	46.9	449	83.9	10060		277	451	0.614191	4.14207	47.1173	0.210017	112.83	111.83	0.14976	243.911	242.911	0.20031	2.04856	2.38545	2.90599
LR_15_TAR-3 - 49	rim			15.076	0.269827	Below LOD	206.5	7.93797	772.729	39.518	757.692	791.09		0.541	461300	926	1.69	Below LOD	Below LOD	10.43	0.049	0.89	2.59	0.299	16.01	5.96	76.2	31.17	144.3	32.75	317.7	59.98	10150		194.7	383.2	0.50809	4.16929	45.4483	0.141955	408.72	407.72	0.126115	220.586	219.586	0.109687	2.61036	2.3416	3.89323
LR_15_TAR-3 - 52	core/inner part			15.356	0.289587	Below LOD	240	5.84225	743.246	37.5675	729.039	760.578		0.463	457000	868	1.4	Below LOD	0.093	7.34	0.072	0.89	2.19	0.358	14.1	5.15	68	28.4	136.5	33	334	66	9820		166.5	365.9	0.455042	4.91176	46.5377	0.196959	351.378	350.378	0.164192	61.5243	60.5243	0.0871982	2.54454	1.78193	3.70603
LR_15_TAR-3 - 53	core/inner part			15.272	0.275536	Below LOD	274	3.6997	702.265	34.9462	689.173	718.216		0.55	476100	898	1.66	Below LOD	Below LOD	9.52	0.044	0.87	1.9	0.407	12.7	4.72	64.1	27.7	145	36.5	389	79.3	9870		244	559	0.436494	6.06864	48.2371	0.253302	609.204	608.204	0.196811	489.379	488.379	0.175623	2.78405	2.68876	4.10396
[truncated: 1 more columns]

## Sheet: Zircon_data_by_sessions
Samples				Al	Rb	Sr	Ba	Zr	P	Ti	Y	Nb	La	Ce	Pr	Nd	Sm	Eu	Gd	Tb	Dy	Ho	Er	Tm	Yb	Lu	Hf	Ta	Th	U
Session20141111
LR-01_Td-Hgch - 1	core/inner part of 2		ok,inhom inU,Th,REE	<2.9754	0.302078		<0.097192	476617	225.959	5.64362	1539.54	1.89531	<0.039463	11.2264	0.0844356	1.98677	4.91157	0.668237	28.6143	10.2933	129.297	50.5787	248.983	52.0843	474.279	89.9998	10241.2	0.906935	273.215	431.974
LR-01_Td-Hgch - 2	rim		ok	<3.005	0.133033		<0.12113	470423	241.608	3.8602	704.096	1.87034	<0.041819	6.16779	0.036179	0.616133	1.44563	0.271807	10.2155	3.88943	53.4086	21.7735	115.963	27.5976	274.351	55.7597	9698.43	0.880814	125.734	299.576
LR-01_Td-Hgch - 4	rim		ok	<3.0305	0.144714		<0.092566	472397	233.642	3.15053	950.242	3.464	<0.039377	11.7754	0.0422841	0.683407	1.79256	0.31846	12.4043	4.87826	67.1739	29.2265	161.705	39.1673	387.332	81.7522	10090.4	1.5529	275.638	586.251
LR-01_Td-Hgch - 5	core/inner part		shorter,inhom.inU,REE,Th,endAlincl	<3.5256	0.248414		<0.11633	488123	117.113		1150.12	1.76256	<0.044061	11.1515	0.0751366	1.36068	2.97587	0.549674	17.2482	6.37404	84.3075	34.8472	187.88	45.0976	443.601	91.6929	11035	0.997357	405.429	774.786
LR-01_Td-Hgch - 6	core/inner part		ok	<3.0257	0.0933906		<0.14009	464076	181.693	5.88436	585.21	2.13028	<0.04247	7.26201	0.033138	0.388118	1.16053	0.21985	7.76035	3.05245	44.8675	18.4999	96.6829	23.2308	229.589	44.1666	9727.09	0.969202	117.783	287.678
LR-01_Td-Hgch - 8	rim		ok	<2.9505	0.260194		<0.10445	479429	139.682	2.7884	1147.43	2.06399	<0.039346	10.2985	0.10798	1.76346	3.19648	0.764602	18.0689	6.59335	84.3063	35.0575	190.952	46.2855	469.091	102.591	9898.96	0.948303	419.532	773.537
LR-01_Td-Hgch - 9	core/inner part of 10		ok,inhom,1stparthigherinU,HREE,Th,Y	<2.9704	0.200204		<0.14721	474300	177.079	4.52776	1135.35	1.85475	<0.035301	10.1917	0.0616576	1.31878	2.71013	0.527173	18.7511	6.78576	87.7858	35.6192	182.381	41.1922	396.341	78.4097	10109.2	0.864835	260.876	442.366
LR-01_Td-Hgch - 10	rim		ok	<3.005	0.150523		<0.1261	470572	190.853	4.38253	859.778	2.48765	<0.035482	9.44425	0.0700441	0.936181	1.66547	0.444301	10.8423	3.97968	57.7603	25.2457	141.971	36.9101	377.48	83.0408	9806.12	1.00192	315.876	596.52
LR-01_Td-Hgch - 11	core/inner part		ok	<3.0685	0.101153		<0.1707	473663	142.527	4.18315	522.489	1.44876	<0.040925	5.58775	0.0203161	0.429816	1.01283	0.192933	6.74472	2.79891	40.1272	16.5404	87.1828	20.4052	194.322	39.0104	9989.45	0.519935	81.0684	196.338
LR-01_Td-Hgch - 12	rim		ok	<3.0134	0.15284		0.0936955	470383	195.796	6.91729	627.687	1.77779	<0.038973	6.43688	0.0329633	0.481371	1.26702	0.198195	9.21708	3.65911	49.432	19.959	101.945	23.4097	221.129	43.6957	9830.06	0.838943	90.5426	205.244
LR-01_Td-Hgch - 13	rim		ok	<2.9677	0.137722		<0.11296	472442	183.42	5.33356	702.065	1.98067	<0.039363	7.36571	0.0396785	0.601947	1.62439	0.255585	9.97234	4.05962	53.8102	22.1216	117.123	27.41	273.157	53.8063	9712.54	0.879562	130.62	304.456
LR-01_Td-Hgch - 16	rim		ok	<3.0084	0.0844902		<0.13297	471888	147.325	3.7405	389.968	1.05103	<0.038124	3.41318	<0.017905	0.281097	0.786415	0.200249	5.32033	1.96352	26.893	11.7779	65.0024	16.9294	181.881	38.2853	8974.8	0.452232	66.1671	193.17
LR-01_Td-Hgch - 17	core/inner part		ok	<2.9452	0.24906		<0.1107	472947	222.437	6.04727	1523.27	1.80312	<0.035657	10.6435	0.107586	1.99613	4.77552	0.760618	29.5754	9.98293	130.134	50.6225	242.295	53.1046	471.226	86.7651	9862.65	0.809994	275.782	417.659
LR-01_Td-Hgch - 18	core/inner part		ok, inhom.inU,Th,REE(1stishigher)	<3.0336	0.258448		<0.077902	480566	274.732	6.15087	1203.08	1.81261	<0.040515	9.17922	0.107258	1.74557	3.67306	0.506783	22.3865	7.73528	100.664	39.7791	194.048	42.1761	387.185	74.1975	9916.44	0.838459	202.846	340.5
LR-01_Td-Hgch - 20	rim		ok	<3.4945	0.433855		0.173055	491430	205.511		1687.64	6.71512	<0.045874	31.1843	0.0734322	1.24747	3.1825	0.680336	22.6898	8.56664	122.868	51.893	282.288	67.3953	683.94	142.576	9981.46	2.79972	1101.68	1925.63
LR-01_Td-Hgch - 21	rim		ok	<2.9943	0.144173		<0.11241	479045	164.461	4.18743	628.142	2.16891	0.110475	7.24322	0.0474654	0.58218	1.0262	0.308297	6.78534	2.64693	41.0926	18.2565	107.666	28.0218	312.437	70.0201	9189.42	1.01091	206.298	501.205
LR-01_Td-Hgch - 22	rim		ok	<3.0603	0.284053		<0.1148	475866	213.61	4.49797	1152.26	2.8852	<0.042027	10.4258	0.095036	1.35994	2.8354	0.580632	15.9691	5.73111	81.2856	34.9814	192.826	46.8311	482.079	101.57	9378.8	1.2176	323.248	654.719
LR-01_Td-Hgch - 24	rim		ok	<3.4511	<0.10571		<0.1481	488100	161.407	4.73804	501.831	1.76094	<0.042057	7.53126	0.0285097	0.434258	1.09778	0.179251	6.5096	2.52978	35.2189	15.1146	82.3612	19.8411	209.703	45.4792	10139.1	0.748687	285.114	468.354
LR-01_Td-Hgch - 25	rim		shorter,endCa,LREErichincl.	<3.5914	0.171141		<0.14465	509040	199.627	5.70825	1356.7	1.58526	<0.04388	10.3522	0.0741559	1.7008	4.19334	0.633691	26.3383	9.24213	117.494	45.6063	215.406	46.568	417.867	74.3337	10365.1	0.620215	212.679	324.815
LR-01_Td-Hgch - 26	core/inner part of 27		ok	<2.9881	0.292963		<0.15559	477911	145.757	2.89884	1074.4	1.38718	<0.038883	7.49146	0.131686	2.32479	3.45906	0.840395	16.5844	6.04901	78.4478	31.636	174.027	42.8659	460.033	95.2382	9523.51	0.622086	353.691	590.118
LR-01_Td-Hgch - 28	rim		ok	<2.9836	0.181604		<0.12515	479339	221.935	6.55493	740.486	2.09958	<0.040282	7.26555	0.0240872	0.582705	1.62601	0.198362	11.2562	4.26116	58.3084	23.7679	122.89	27.5231	264.28	52.5662	10007.7	1.06878	112.226	271.315
LR-01_Td-Hgch - 29	rim of 28		ok	<3.0924	0.125249		<0.14436	487229	92.4632		439.045	1.22025	<0.040911	5.23372	<0.018186	0.326421	0.692532	0.192336	5.16075	2.07106	28.3877	12.8006	73.5224	19.0338	209.165	46.0355	10705.8	0.515302	117.506	315.721
LR-01_Td-Agch - 4	rim		ok	<3.2089	0.368539		<0.098815	476406	305.474		1400.2	9.58085	<0.028208	8.36422	0.0169059	0.537018	1.99734	0.230578	17.5797	7.5779	111.202	47.2364	247.156	55.6006	519.885	102.105	10959.1	3.68962	126.052	461.199
LR-01_Td-Agch - 7	rim		ok	<3.1318	0.586173		<0.11343	469204	501.875	2.88681	1967.52	11.5206	<0.031768	15.2425	0.0573309	0.913093	3.30992	0.347375	28.4201	11.509	163.909	66.3857	330.383	72.4602	665.236	120.979	10627.2	4.45522	346.396	979.178
LR-01_Td-Agch - 9	rim		ok	<3.2171	0.387959		<0.11213	483318	354.846		1608.71	6.42085	<0.033107	12.7778	0.027771	0.922687	3.41998	0.387951	26.8568	10.1626	140.961	56.2706	272.478	60.1924	546.283	101.184	10696.5	2.07292	181.786	452.996
LR-01_Td-Agch - 13	core/inner part of 14		shorter,endCa,Pincl.	<3.8513	0.417936		<0.1475	489301	231.622		1269.39	3.68315	<0.03946	7.32271	0.0356554	0.760367	2.64024	0.336718	21.2729	7.99969	112.298	45.206	215.902	46.7021	436.383	76.4627	10970.2	1.45045	108.997	319.788
LR-01_Td-Agch - 16	rim		shorter,endCa,Pincl	<3.445	0.599032		<0.14297	474704	353.207	4.48211	2566.72	5.72212	<0.033006	10.8276	0.0752747	2.21556	6.81647	0.718407	48.4896	17.7975	235.612	91.6942	421.615	87.9708	781.168	138.142	9900.15	1.8043	257.694	595.901
LR-01_Td-Agch - 18	core/inner part of 17		shorter,1stpartCa,Pincl.	<4.2062	0.743655		<0.17551	457282	508.279		2533.6	17.3544	<0.046251	15.372	0.0340914	0.91567	3.45708	0.292926	33.6014	14.5845	207.661	84.0705	414.126	87.8841	780.208	148.007	11438.2	7.58914	593.597	1604.23
LR-01_Td-Agch - 22	rim of 21		ok	<3.1286	0.314987		<0.086635	474414	328.499		1455.13	7.37326	<0.031279	12.5402	0.0583883	1.12957	3.27935	0.491747	25.4761	9.75413	133.381	51.3982	244.208	52.2169	463.98	85.5127	10282.6	2.51993	193.936	489.705
LR-01_Td-Agch - 23	core/inner part		heterogeneous	<3.2454	0.157671		<0.07291	473819	152.289	2.48244	453.959	2.68633	<0.033697	4.567	<0.015778	0.289389	0.916213	0.142691	6.15672	2.43804	35.4553	15.0395	78.4387	18.1843	176.003	36.2419	9687.94	0.714659	38.6306	134.381
LR-01_Td-Agch - 24	core/inner part		1stpartPincl,shorter	<3.8276	0.402214		<0.11093	455808	412.547		1803.89	13.9144	<0.037242	9.36026	<0.019977	0.593148	2.34311	0.253842	22.0896	9.31515	143.334	60.4579	313.607	72.6004	662.122	133.74	11080.5	4.69405	157.236	614.632
LR-01_Td-Agch - 27	rim		twoparts,inclbetween	<4.2543	0.284891		<0.18987	477027	235.697	4.7025	934.139	4.76132	<0.046207	13.0176	0.0333969	0.826337	2.31329	0.376917	14.97	5.78677	78.4265	31.1294	156.361	35.6598	319.885	63.1006	9883.19	1.42401	135.61	290.046
LR-01_Td-Agch - 30	core/inner part of 31		inhomogeneous,endisdiffinREE	<3.8048	0.748776		<0.17528	486916	371.341	4.70098	3321.81	6.5215	<0.040809	15.3863	0.270531	5.0771	11.7447	1.84499	71.5129	24.4893	314.261	115.345	540.988	111.89	992.541	173.947	8995.35	1.6091	333.597	592.423
LR-01_Td-Agch - 34	rim		short,endAlincl	<4.2643	0.500077		<0.12206	486859	399.795		1738.69	8.80781	<0.040665	17.9618	0.0368504	1.46457	4.05182	0.524433	28.5587	11.311	149.969	59.2452	295.744	63.277	580.687	103.172	10600.9	2.51345	302.535	620.612
LR-01_Td-H2Ngch - 1	rim		ok	<3.1448	0.229568		<0.10869	466813	271.311	11.5031	779.002	1.51161	<0.033581	4.72306	0.0580125	1.24923	2.4597	0.68131	14.7335	5.04226	66.7598	26.1489	128.496	28.2787	257.257	49.435	7349.14	0.455677	69.725	165.703
LR-01_Td-H2Ngch - 2	rim of 1		ok,fewBa	<3.1059	0.236904		4.18633	472815	282.251	12.0433	1181.66	2.5362	0.0467239	6.06385	0.0876366	1.40978	3.14948	1.00764	19.3938	7.03407	95.4532	39.9084	200.641	43.9326	412.729	77.2247	7199.86	0.675137	81.8687	201.055
LR-01_Td-H2Ngch - 3	rim		ok	<3.1388	0.194689		<0.11024	474596	252.056	11.5728	903.533	2.10364	<0.036039	5.96031	0.0716615	1.10322	2.85905	0.745791	16.5901	5.87354	76.0136	30.8107	153.842	33.8139	306.969	59.5399	7757.21	0.680003	63.6381	157.217
LR-01_Td-H2Ngch - 6	core/inner part of 7		ok	<3.1018	0.407807		<0.10971	470284	317.369	9.74665	2082.04	3.02807	<0.033704	10.035	0.283579	4.58406	8.79343	2.15284	48.1054	15.5964	194.996	70.4793	332.139	69.1342	607.791	112.137	7768.21	0.900964	206.159	342.073
LR-01_Td-H2Ngch - 10	core/inner part		ok	<3.1448	0.302329		<0.087898	474871	295.529	12.3567	1110.62	2.16321	<0.032796	5.52217	0.0712508	1.38161	3.34199	0.864294	19.6979	6.86801	93.3095	37.6369	186.435	40.2194	370.194	69.1055	7393.88	0.669815	74.5509	172.039
LR-01_Td-H2Ngch - 11	rim		ok	<3.1216	0.250054		<0.11987	478489	289.292	10.9651	952.439	2.026	<0.035678	6.50659	0.0855171	1.50993	3.47074	0.802092	19.3142	6.70046	85.5779	33.2817	158.545	32.9296	287.411	53.6832	7945.14	0.616371	126.632	211.233
LR-01_Td-H2Ngch - 13	rim		ok,endAlincl	<3.3637	0.352949		0.091391	475343	281.985	7.6885	1320.89	3.3729	<0.03997	8.27272	0.068924	1.41293	3.5857	0.800532	23.7897	8.42484	113.016	45.0612	219.098	47.1107	427.939	78.4144	8315.42	0.894859	127.627	259.61
LR-01_Td-H2Ngch - 14	core/inner part		ok	<3.1094	0.278705		<0.091733	464451	223.228	5.44397	1630.35	1.36099	<0.033497	7.03924	0.194148	3.94746	8.18682	1.62268	44.9857	14.0758	165.009	58.4568	263.405	51.7358	453.401	79.449	8793.39	0.513824	141.64	232.979
LR-01_Td-H2Ngch - 16	rim		ok	<3.1525	0.271143		<0.098607	470719	251.042	8.7734	1116.78	1.85553	<0.033492	6.42101	0.0973506	1.89655	4.49434	0.982314	24.9504	8.39345	104.865	39.4686	185.312	39.0921	348.808	64.1252	8194.8	0.573995	82.0162	165.46
LR-01_Td-H2Ngch - 17	core/inner part		ok	<3.0736	0.289181		<0.091027	478734	341.486	12.657	1649.73	3.67628	<0.034327	9.59428	0.0984194	1.72329	4.32569	1.16746	26.4818	9.66186	133.564	54.0119	273.635	59.131	528.223	98.751	7411.75	1.09279	150.431	311.238
LR-01_Td-H2Ngch - 20	core/inner part		ok	<3.1667	0.538915		<0.12987	473469	324.115	10.1631	2635.95	1.89663	<0.033552	11.9857	0.430755	7.15466	13.3931	3.15161	76.2672	23.2433	270.313	93.9235	406.791	78.7884	672.662	113.082	8023.54	0.677234	242.243	293.687
LR-01_Td-H2Ngch - 26	rim		ok, smallinhom.inU,Y	<3.1957	0.228455		<0.1006	470677	154.135	8.4908	936.462	1.10691	<0.03561	4.88387	0.108996	1.92857	4.67815	1.02252	24.8634	7.65139	94.2498	33.2981	149.582	29.8539	270.327	47.6412	8285.99	0.319867	60.6348	102.485
LR-01_Td-H2Ngch - 30	rim		ok	<3.1021	0.545295		<0.1191	473445	315.841	9.90289	2191.18	3.99162	<0.033305	12.4794	0.220321	3.71344	8.26582	1.72115	47.0862	16.0073	200.475	74.7506	345.99	71.2594	613.542	114.204	7847.78	0.995105	248.789	378.765
LR-01_Td-H2Ngch - 33	rim		ok	<3.0952	0.232857		<0.10889	469654	250.313	9.76606	845.843	1.95149	<0.032593	5.83622	0.0618993	0.972936	2.67477	0.640671	15.9355	5.49404	72.2204	28.5954	142.974	31.7661	290.821	58.2699	7823.45	0.638256	60.8713	160.788
LR-01_Td-H2Ngch - 41	core/inner part		ok	<3.0442	0.173352		<0.10472	471039	270.546	10.4057	782.45	1.54659	<0.03595	6.44163	0.0736851	1.22723	2.98531	0.673949	16.5256	5.61881	69.7157	26.9025	132.1	27.741	252.781	47.126	8052.89	0.580712	88.9113	181.437
LR-01_Td-H2Ngch - 42	rim		ok	<3.1445	0.251912		<0.14776	477821	302.544	12.1572	1419.25	2.89355	<0.034339	8.94719	0.103434	2.09733	4.40988	1.14326	26.4194	9.02518	120.914	48.5837	237.6	51.1551	463.294	88.3972	7641.38	0.790039	120.931	234.151
LR-01_Td-Figch - 4	core/inner part		ok	<3.0218	0.336809		<0.10773	470520	309.03	12.2201	1764.32	2.24696	<0.035908	8.02168	0.243507	4.11013	8.48158	2.18906	44.4634	14.1743	171.54	62.647	283.771	57.5047	494.028	89.2879	7245.35	0.679566	145.052	219.231
LR-01_Td-Figch - 5	core/inner part		ok,inhominUThY	<3.0368	0.243021		<0.12372	470426	203.243	8.83851	1192.94	1.02725	<0.036477	4.97338	0.165718	2.86769	6.03633	1.3521	29.941	9.74755	115.629	42.5822	192.941	39.3044	348.389	61.7633	8183.35	0.293757	89.8703	134.722
LR-01_Td-Figch - 6	core/inner part of 7		ok	<3.0638	0.25705		0.0974931	475080	306.78	11.8663	1235.49	2.57462	<0.038531	7.45157	0.0839992	1.47539	3.38639	0.903025	20.8143	7.56579	103.582	41.5657	206.365	45.3048	404.89	76.9508	7708.48	0.76234	98.8908	202.593
LR-01_Td-Figch - 7	rim		ok	<2.969	0.558131		<0.080423	476657	434.829	11.4276	2421.5	5.76906	0.0606461	19.5788	0.157654	2.93969	6.71773	1.54032	45.3068	16.2201	216.657	82.4785	394.481	80.1118	691.121	123.341	8018.58	1.37092	389.546	500.714
LR-01_Td-Figch - 12	rim		ok	<2.9746	0.316353		<0.123	476957	300.544	7.72479	1234.1	3.54238	<0.035419	11.1301	0.0984467	1.8202	4.10476	0.75676	26.3334	8.96155	112.545	43.5743	205.754	43.0091	378.067	69.8121	8641.72	1.0671	319.276	416.764
LR-01_Td-Figch - 15	core/inner part		ok,inhominU,Th,REE,,endAlincl	<3.1257	0.47368		<0.15719	468805	326.355	8.96717	2497.58	2.23379	<0.039317	10.8108	0.378084	6.22854	12.9221	2.70515	70.0187	21.4488	250.613	87.5347	382.63	76.1211	646.119	114.355	8122.92	0.66191	259.847	313.067
LR-01_Td-Figch - 16	rim		ok	<2.9796	0.212022		<0.12768	463150	248.419	8.57146	908.383	2.20971	<0.039071	6.23189	0.0479841	1.07141	2.76172	0.627031	17.2939	5.88532	79.5884	30.2037	155.654	33.3872	307.514	58.666	8122.28	0.647148	70.3941	166.666
LR-01_Td-Figch - 20	rim		ok	<2.9444	0.233842		0.0852613	460329	337.266	5.57791	1275.8	4.36045	<0.036677	12.1455	0.0893046	1.63144	4.11904	0.556952	25.2141	8.65829	112.699	44.2705	214.778	45.9317	402.018	75.814	8617.94	1.60607	162.318	360.589
LR-01_Td-Figch - 22	rim of 21		ok,1stpartY,REEricher	<3.0701	0.479306		<0.16017	462302	298.282	6.63797	2001.92	1.91285	<0.041201	10.0245	0.261503	5.13949	10.2206	1.8331	53.0043	16.7757	200.297	71.6439	316.4	62.975	539.174	95.0861	8420.54	0.653833	228.787	315.497
LR-01_Td-Figch - 28	core/inner part		ok	<2.982	0.316049		<0.13558	468127	236.245	11.2961	1727.39	1.33116	0.0370144	5.22557	0.292805	4.60512	8.55506	2.57744	49.1694	14.983	175.851	62.4342	276.425	55.3311	467.291	86.2799	7403.48	0.414955	124.283	180.643
LR-01_Td-Figch - 29	core/inner part		ok	<2.9894	0.305984		<0.097	471547	196.89	9.82478	1242.33	1.126	<0.041008	5.2049	0.162999	3.22187	6.71941	1.63225	34.0727	10.6242	126.378	44.3059	197.569	40.3366	346.004	61.6974	7823.34	0.323823	83.6436	124.603
LR-01_Td-Figch - 30	rim		ok,inhominLa	<2.9368	0.324322		0.168331	468211	290.265	12.2105	1667.36	1.23187	0.446068	6.77093	0.578495	6.44835	9.68812	2.21107	48.4336	14.5468	172.197	58.802	259.623	49.8613	427.667	74.6679	7732.57	0.367644	119.306	148.585
LR-01_Td-Figch - 32	rim		ok	<2.9494	0.227839		<0.12922	467743	238.111	12.2258	1098.57	1.23534	<0.039115	3.96274	0.154275	2.76601	5.50691	1.4815	30.3168	9.53796	109.336	39.316	180.753	37.0339	320.553	57.75	7306.75	0.33657	72.0908	113.485
LR-01_Td-Figch - 33	core/inner part of 32		ok	<3.0243	0.311207		0.149496	476700	318.725	13.4363	1348.56	2.09938	0.330843	5.98224	0.366202	3.92063	5.70788	1.55886	29.8686	9.54006	121.012	46.3271	216.277	45.1271	399.129	75.4592	7277.81	0.539482	86.7998	166.185
LR-01_Td-Jgch - 5	core/inner part		short,endCaPincl	<4.2275	0.247935		<0.19489	492061	273.265		1097.79	3.88432	0.960145	12.6037	0.459646	2.34192	3.79727	0.217632	20.6238	7.25586	100.45	39.0169	189.026	40.466	362.201	64.655	10220	1.41842	161.933	350.274
LR-01_Td-Jgch - 7	rim		ok	<3.0885	0.323583		<0.094482	478486	231.679	2.96224	1143.42	5.88165	<0.034024	15.886	0.0545704	0.952915	2.38527	0.469285	16.6863	6.25728	86.9467	36.3072	192.294	45.2167	452.218	91.3533	8958.18	2.02247	419.675	772.743
LR-01_Td-Jgch - 15	rim		shorter,1stpartP,Caincl	<3.7322	0.125345		<0.18018	463066	114.776		589.356	2.42946	<0.046353	6.25732	0.0228969	0.346549	0.901968	0.130404	7.09781	2.81727	41.2191	18.3169	99.842	24.2938	259.57	50.8912	9912.9	1.10883	117.478	364.965
LR-01_Td-Jgch - 18	core/inner part		ok	<3.0482	0.129068		<0.10045	477607	149.681		729.662	3.55444	<0.036183	8.78471	0.0232448	0.438917	1.2741	0.199784	9.21987	3.66232	53.7571	23.1219	123.435	29.0318	290.666	58.6456	10118.3	1.77569	250.698	619.613
LR-01_Td-Jgch - 21	core/inner part		shorter,1stpartCaPincl	<4.4172	0.173959		<0.18119	471947	301.36		811.716	3.88645	0.150037	11.2091	0.0798363	0.584896	1.73511	0.257066	11.18	4.59582	60.9671	25.6641	134.402	32.0986	319.516	63.8481	9563.92	1.71466	372.641	829.757
LR-01_Td-Jgch - 23	rim		ok	<3.0671	0.549072		<0.14725	469243	247.776	5.38851	2878.21	2.22446	0.0619939	6.59875	0.564487	8.9487	13.8599	2.3464	62.9656	19.7424	236.946	89.69	443.645	99.5632	972.473	182.475	7377.95	0.811947	566.727	905.743
LR-01_Td-Jgch - 24	rim		ok	<2.9594	0.247646		<0.087329	470868	203.417		893.392	6.30944	0.773099	12.9057	0.211721	1.2743	1.45927	0.202983	10.9553	4.44956	64.7691	28.3288	151.857	36.7767	378.476	76.1064	9994.21	2.6116	279.088	769.76
Session20141114
Td-Sgch- - 1	rim			<4.3301	0.280653		<0.16081	457817	260.092	13.1734	877.423	1.95833	0.044473	5.94671	0.050699	1.18561	2.63368	0.667921	16.1735	5.63493	74.3143	29.3704	145.485	31.4164	283.243	58.8093	7944.15	0.650789	67.9948	150.11
Td-Sgch- - 5	core/inner part of 6		heterogeneous	<4.2706	0.745757		<0.14225	460359	330.939	8.15715	3034.39	2.88877	0.0446867	15.6138	0.500681	8.67238	17.6593	3.3485	88.6171	26.7024	306.014	106.715	466.165	89.3827	746.34	138.323	8104.39	0.832033	356.442	430.247
Td-Sgch- - 6	rim			<4.2713	0.305359		<0.15948	459582	345.249	6.36677	1290.01	4.01	<0.035434	12.6921	0.0974937	1.83276	4.17906	0.695962	25.1759	8.66267	114.795	44.2644	214.841	44.167	394.064	75.6933	9202.82	1.12822	198.244	357.104
Td-Sgch- - 13	rim			<4.3074	0.194493		<0.13015	451174	246.864	9.04161	737.583	1.66738	<0.032895	5.58329	0.0649418	0.910271	2.366	0.496725	14.2767	4.86446	64.5297	24.6676	123.601	25.6491	239.775	49.143	8736.83	0.523359	72.2689	162.996
Td-Sgch- - 15	rim			<4.2996	0.493503		<0.15463	455117	324.188	12.8117	2020.71	3.68102	<0.036	10.9393	0.200922	3.4416	6.98933	1.7426	42.7467	14.3715	183.473	70.3034	328.1	65.4326	571.02	109.938	7552.49	0.910852	215.215	328.718
Td-Sgch- - 16	core/inner part		Heterogeneous	<4.8407	0.161953		<0.19788	469267	209.99	8.15678	984.318	1.84094	0.0734264	5.24311	0.0880461	1.40036	3.37158	0.887677	20.5531	6.85495	89.2572	34.205	165.509	34.3894	305.468	59.9834	8140.74	0.460363	78.5655	161.388
Td-Sgch- - 19	core/inner part			<4.177	0.400875		<0.17079	447663	384.027	4.15669	1996.74	8.97635	<0.036028	28.1426	0.14454	2.66852	7.07809	1.10707	46.1439	15.3766	192.875	70.7012	327.201	65.0763	561.337	102.635	9470.57	2.7823	945.825	1168.43
Td-Sgch- - 22	core/inner part of 22			<4.2867	0.311775		<0.13024	450962	316.48	6.52158	1175.55	4.9738	<0.033137	7.78524	0.0534671	1.02255	2.95941	0.541602	19.718	7.40503	102.245	40.2679	199.991	41.9516	383.502	73.5456	9422.26	1.53119	154.687	394.675
Td-A_CAgch - 1	rim			<4.7134	0.632321		<0.17422	450712	555.766		2600.36	15.3543	<0.032758	16.2206	0.0567324	1.02797	4.15986	0.357074	37.0604	15.2686	217.318	88.5432	438.311	91.5393	823.997	158.32	11719.4	5.99425	488.212	1309.71
Td-A_CAgch - 2	rim		Apatite at beginning	<6.2819	0.535106		<0.25008	437674	398.78		1987.55	13.0699	<0.048651	9.83409	<0.027798	0.556851	2.43724	0.231946	26.6571	10.7307	162.513	68.0601	344.778	74.8436	682.755	137.286	11382.5	4.13823	201.821	694.953
Td-A_CAgch - 3	core/inner part		heterogeneous	<4.4733	0.815696		<0.12086	455771	561.443	4.04314	3806.41	5.73231	0.155659	17.3193	0.448634	7.32364	15.2092	2.30079	93.2209	30.2822	369.213	134.4	613.075	117.644	1007.11	187.472	8675.97	1.37206	406.637	623.606
Td-A_CAgch - 4	core/inner part		heterogeneous	<4.3791	0.498592		<0.14078	457098	384.255	3.47122	2470.35	4.69362	0.0357034	12.6497	0.256325	4.27724	9.62387	1.57364	57.2098	18.5669	236.765	87.1711	411.35	80.4463	700.739	135.371	9443.7	1.22609	225.391	408.713
Td-A_CAgch - 5	core/inner part		heterogeneous	<4.592	0.49049		<0.14884	457398	374.767		2247.47	6.6802	<0.03229	14.147	0.115524	2.04314	5.33526	0.656848	37.8358	14.4222	196.774	76.9322	379.34	78.7088	693.131	134.047	11145.5	2.3054	251.407	629.635
Td-A_CAgch - 6	rim		heterogeneous	<4.6198	0.591568		<0.16199	452822	539.825	4.60799	1766.18	10.1156	<0.031887	10.984	0.031668	0.670766	2.64819	0.342577	23.1495	9.72541	142.512	60.6899	316.614	69.5308	649.298	134.692	10328.8	3.21823	201.721	677.296
Td-A_CAgch - 7	rim			<4.4263	0.297945		<0.1511	459131	314.671		1337.83	7.0271	<0.032565	11.8505	0.0244705	0.784541	2.65959	0.304591	20.1703	8.15961	115.066	46.6366	235.225	49.7112	457.582	91.6464	10922.9	2.33332	178.25	490.262
Td-A_CAgch - 11	rim of 10			<4.3369	0.377963		<0.15699	462931	334.921		1347.63	8.08569	<0.034884	13.5164	0.0381481	0.918831	2.47632	0.352099	19.2081	7.44023	107.074	45.3473	235.865	51.7923	487.955	102.447	10376.9	2.5182	133.93	382.179
Td-A_CAgch - 12	rim			<4.7962	0.863504		<0.16601	478771	367.069	3.55427	3676.07	4.39986	<0.034502	14.7299	0.406376	7.75282	16.5673	3.05455	92.9783	29.1443	360.858	129.215	599.607	114.645	978.292	193.462	9289.9	1.17528	324.016	493.741
Td-A_CAgch - 13	rim			<4.2825	0.364996		<0.14297	457079	325.019		1862.5	8.62936	<0.030146	13.0522	0.0594923	1.07654	3.71959	0.474531	29.029	11.197	156.102	64.032	318.791	66.8225	608.27	120.72	11036.2	2.68388	204.591	547.488
Td-A_CAgch - 14	rim		Apatite at beginning	<5.9801	0.410024		<0.19483	452110	520.874		1656.64	4.95026	<0.047456	10.6704	0.0630668	1.22679	3.4712	0.406287	26.6513	10.3211	140.442	56.9934	284.932	59.2883	539.591	109.128	10807.9	1.52953	210.369	481.66
Td-A_CAgch - 15	core/inner part of 14			<4.4048	0.33812		<0.14721	466591	546.778		1669.45	5.30472	0.0339	9.2918	0.0632707	1.04126	3.22985	0.50366	26.4139	9.87669	139.841	57.3321	287.64	59.9634	556.04	110.153	10293.9	1.47351	192.626	454.201
Td-A_CAgch - 16	rim			<4.2725	0.256997		<0.14285	450031	420.905		1077.31	5.60924	<0.031666	8.74656	0.016796	0.555344	2.00392	0.306107	15.0658	6.13332	87.4296	37.0005	195.015	41.5704	390.195	81.8383	10139.2	1.5877	94.2205	299.323
Td-A_CAgch - 19	rim			<4.2355	0.504339		<0.15725	448688	420.691		1913.98	15.181	<0.035621	10.3059	0.0165131	0.445925	2.28355	0.216102	22.9144	9.83047	147.468	64.3873	343.294	76.1812	718.69	148.495	11589.9	5.2287	194.728	749.635
Td-A_CAgch - 20	rim		heterogeneous	<4.4067	0.280538		<0.13485	464325	359.274	3.30625	1338.24	6.3738	<0.033706	21.2184	0.107098	1.71633	4.37537	0.398353	27.3872	9.61657	123.034	46.2841	223.754	44.8736	402.399	78.522	10009.7	1.78335	384.005	448.971
Td-A_CAgch - 23	rim		Apatite at beginning	<7.4693	0.69304		<0.29083	440160	619.287		2155.14	13.017	<0.071223	16.2467	0.0458596	1.06179	3.64437	0.371299	31.2786	12.4807	175.211	72.6246	364.617	75.7159	669.392	131.424	10867.3	5.42211	405.943	986.318
Td-A_CAgch - 24	core/inner part of 23		heterogeneous	<4.3402	0.294173		<0.14478	464270	344.19	3.30301	1485.59	4.57123	<0.036607	7.92189	0.0362399	0.794168	2.93963	0.422268	23.4135	9.19517	126.674	50.8721	255.762	53.6817	490.096	97.1884	10272	1.67758	141.838	401.059
Session20150323
DEMSPA-Grain1 - 2	rim	Analysis 2		<4.9143		0.485103	<0.067979		149.257		585.663	1.80525	0.0923819	8.86992	0.0475506	0.659437	1.16606	0.311399	7.49844	2.70313	39.9647	17.0496	98.0871	25.2002	268.353	57.2561	10062.8	0.924924	384.684	735.107
DEMSPA-Grain2 - 3	rim			<4.927		0.331193	<0.07023		185.315		527.729	1.64457	<0.037966	5.95284	0.0261426	0.473701	1.18511	0.267731	7.0495	2.55663	36.911	15.9106	87.7022	22.1737	236.287	50.6084	9246.56	0.722376	147.07	348.703
DEMSPA-Grain3 - 4	rim			<5.1603		0.270322	<0.075194		220.104		578.702	1.65849	<0.025849	6.12872	0.0273163	0.396924	1.28437	0.161445	8.759	3.25699	44.6461	18.828	96.2493	21.4393	204.015	39.2464	10426.2	0.812803	82.1736	192.668
DEMSPA-Grain4 - 5	rim		melt inclusion avoided	<6.1192		0.611414	<0.091746		189.399		807.668	3.00189	0.871949	12.2901	0.202758	1.38427	1.39052	0.375801	8.68419	3.39014	52.367	23.8834	139.801	35.7601	394.944	87.5432	9880.15	1.4333	301.494	729.412
DEMSPA-Grain5 - 6	rim			<4.9254		0.554255	0.17212		168.105		901.152	3.25878	0.0451001	14.42	0.0418057	0.609137	1.51128	0.35677	10.9408	4.18406	61.5514	27.1631	157.892	40.0543	428.454	92.3952	9815.15	1.47923	499.938	925.686
DEMSPA-Grain6 - 7	core/inner part	Analysis 1		<5.018		0.450074	<0.084231		243.979		1141.11	1.8775	<0.053377	8.85212	0.0727121	1.57278	3.36583	0.454972	21.5049	7.39209	95.6014	37.4474	183.923	39.2339	365.82	68.7405	10228.8	0.73251	174.892	295.266
DEMSPA-Grain6 - 8	rim	Analysis 2		<4.8144		0.400986	<0.07953		245.621		690.735	1.98774	<0.028931	8.25364	0.0394547	0.473358	1.62155	0.269316	10.7051	4.11723	54.3746	22.1325	112.221	24.5556	231.039	44.9189	10234.8	0.862623	133.493	289.565
DEMSPA-Grain7 - 9	rim			<5.0194		0.395832	0.0749355		224.153		638.516	2.08584	<0.039643	8.07773	<0.028332	0.670943	1.45481	0.208567	9.84751	3.69779	48.459	20.2144	106.66	23.8753	234.504	45.1007	10853.3	0.996824	146.049	333.23
DEMSPA-Grain9 - 11	rim		melt inclusion avoided	<6.063		0.508651	<0.086754		153.303		352.761	1.20365	0.0450232	5.24928	0.0236279	0.497911	0.699078	0.17103	3.92374	1.63466	23.8793	10.2598	59.0568	15.1552	165.599	38.1018	9689.61	0.574767	151.991	387.056
DEMSPA-Grain10 - 12	rim			<5.1271		0.477519	<0.067364		150.597		559.85	1.93025	<0.031443	7.24184	<0.024941	0.376794	1.12709	0.253476	6.71014	2.51848	35.8897	16.2464	94.535	25.2054	275.679	60.3677	9902.79	0.875467	232.585	552.654
DEMSPA-Grain11 - 13	rim			<5.1088		0.355142	0.105687		250.986		918.981	2.75862	<0.038286	12.2458	0.0513064	0.934611	2.07125	0.383186	12.5441	4.77444	64.9451	27.8358	151.946	35.8126	357.542	72.652	10291.8	1.25989	344.662	644.875
DEMSPA-Grain12 - 14	rim			<5.0557		0.385184	0.0712976		380.295		1223.12	2.07222	0.0363568	8.99434	0.0605977	1.3742	3.02427	0.513978	20.1913	7.36157	98.6318	40.1825	201.397	42.7687	411.257	78.0465	10456.7	0.928381	205.306	377.898
DEMSPA-Grain14 - 16	rim			<5.1809		0.511805	<0.087951		144.474		586.124	1.70513	<0.03186	6.07007	0.031154	0.497683	1.41201	0.276064	7.79329	3.01108	41.9936	17.9375	97.2888	23.7654	249.266	51.7929	9975.13	0.774589	163.43	380.481
DEMSPA-Grain17 - 19	core/inner part			<5.1022		0.920413	0.177918		511.876		1523.22	5.15462	2.74172	30.0727	0.808351	4.68398	4.08537	0.496283	24.8447	9.33539	122.815	49.398	251.787	54.9846	520.96	97.8518	10702.2	2.59554	851.771	1177.88
DEMSPA-Grain18 - 20	core/inner part	Analysis 1		<4.9242		0.527663	<0.066872		189.466		1786.24	2.22724	<0.0377	10.9724	0.205628	3.32007	5.97227	1.07934	32.4699	11.1795	145.936	58.0404	293.916	65.3486	637.177	121.178	9530.92	0.982458	461.923	732.386
DEMSPA-Grain18 - 21	rim	Analysis 2		<4.9505		0.430008	0.0847828		282.325		1122.03	3.59983	<0.049814	10.8171	0.0543166	1.19136	2.36186	0.55716	13.9875	5.37424	78.5176	34.2639	192.425	47.4204	491.181	102.379	9058.89	1.50909	372.691	752.988
DEMSPA-Grain21 - 24	rim			<5.0228		0.467915	<0.071453		217.589		687.694	2.03534	<0.030587	8.20311	0.0320965	0.456312	1.64963	0.199267	10.7863	3.93876	54.3429	21.9954	115.914	26.1333	251.924	50.0523	10523.4	0.954087	151.751	346.048
DEMSPA-Grain22 - 25	rim		melt avoided late	<4.9927		0.858277	0.128695		376.73		2985.01	5.02537	<0.046183	25.5877	0.397509	5.72289	9.94225	2.14457	53.4561	18.4128	240.6	94.6096	493.075	115.826	1155.67	229.45	7995.95	1.67831	918.884	1292.04
DEMSPA-Grain23 - 26	rim			<5.0128		0.508229	0.161195		239.502		662.213	2.11255	0.0424943	8.49302	0.0436829	0.515161	1.52043	0.277527	10.0496	3.62787	52.2504	21.1704	110.521	25.0764	246.249	48.0239	10555.1	0.980018	148.406	328.995
DEMSPA-Grain28 - 32	rim	Analysis 1		<5.2881		0.465707	<0.083808		320.647		1169.49	4.74849	0.194628	13.8567	0.0662819	0.889343	2.24141	0.309847	15.9149	6.1786	88.2866	37.1181	197.842	46.0163	445.071	89.2289	10655	2.15066	246.93	570.156
DEMSPA-Grain28 - 33	rim	Analysis 2		<4.9129		0.286513	<0.070522		258.528		882.563	3.00744	<0.043095	10.3453	0.04092	0.608327	1.96453	0.256798	13.6241	5.07998	68.8373	27.9306	149.234	33.719	330.491	64.7455	10872.4	1.53098	240.741	571.988
DEMSPA-Grain30 - 35	rim			<5.6143		0.296861	<0.070965		319.172		901.304	2.7241	<0.060562	11.7897	0.0804132	0.972844	1.99248	0.319907	14.4218	5.2897	72.0414	28.9217	148.626	32.4597	309.325	59.5521	10579.5	1.22966	232.046	440.046
DEMSPA-Grain31 - 36	rim	Analysis 1		<5.1548		0.394358	<0.076925		241.588		752.106	2.11407	<0.031541	9.95045	0.0354954	0.671576	1.71155	0.306133	11.7428	4.51257	61.7016	24.2601	124.471	27.6693	261.691	49.9333	10526	0.962891	167.774	345.561
DEMSPA-Grain31 - 37	core/inner part	Analysis 2		<4.9775		0.495382	<0.082613		332.98		1219.42	3.77525	0.0331694	10.8914	0.0386177	1.20671	2.78302	0.527951	18.0475	6.68454	93.7282	39.2802	208.518	46.9214	457.108	90.7185	9217.65	1.46894	210.872	460.525
DEMSPA-Grain32 - 38	rim	Analysis 1		<4.8573		0.60843	<0.078231		261.153		1021.81	3.79463	0.285385	20.6737	0.146927	1.14956	2.26396	0.49547	14.7832	5.71753	75.8378	31.5739	168.102	41.11	424.578	87.0043	10146.2	1.78676	1140.48	1526.78
DEMSPA-Grain32 - 39	rim	Analysis 2		<4.8454		0.366527	0.108607		208.03		809.348	2.82843	<0.034117	14.2532	0.0369522	0.877903	1.55128	0.449422	10.9543	4.13906	58.309	24.7236	134.33	33.4203	353.711	74.1996	10225	1.37062	787.805	1169.72
DEMSPA-Grain33 - 40	rim	Analysis 1		<4.9189		0.361495	<0.073187		247.353		776.944	2.02281	<0.037961	7.48615	<0.030422	0.612641	1.84585	0.309862	12.0712	4.48301	61.7634	24.9383	129.162	29.1438	290.096	56.1459	9776.87	0.982452	137.183	307.295
DEMSPA-Grain33 - 41	core/inner part	Analysis 2		<5.087		0.789151	0.112081		422.817		2490.51	5.33264	0.200783	21.275	0.24722	3.69333	7.37342	1.17518	45.9693	16.1847	211.727	82.4803	407.044	88.1051	815.387	153.186	9625.47	1.87676	620.882	930.097
DEMSPA-Grain34 - 42	core/inner part			<4.8644		0.366218	<0.068098		156.14		379.414	1.56428	0.0213161	5.52992	<0.020314	0.181518	0.524741	0.116793	4.99819	1.9596	28.6898	12.1211	63.3764	14.7648	144.533	28.7731	10886	0.712774	68.7927	181.044
DEMSPA-Grain35 - 44	core/inner part	Analysis 2		<4.956		0.37114	<0.084016		240.33		793.248	2.19666	<0.034588	8.57903	<0.022463	0.685965	1.87357	0.244469	12.1186	4.5332	62.8673	25.6761	130.81	29.1507	284.553	54.8984	10188.1	1.096	139.164	301.511
DEMSPA-Grain38 - 47	rim	Analysis 1		<4.9263		0.338746	0.118135		161.089		621.843	1.98684	<0.030413	7.72181	0.0300709	0.473124	1.20193	0.29077	7.35152	2.78906	40.4837	18.3038	106	27.4899	310.7	68.7255	10110.7	1.03732	239.602	594.896
DEMSPA-Grain39 - 50	rim	Analysis 2		<5.8034		0.309134	<0.076998		180.554		524.093	1.67963	0.270963	9.08652	0.0846504	0.731792	1.01339	0.275508	6.43461	2.49544	35.9353	15.8613	90.229	22.1824	243.707	52.4602	10581.1	0.855539	342.368	702.677
DEMSPA-Grain40 - 51	rim	Analysis 1, few common-Pb		<5.0725		0.317728	<0.083322		191.292		693.065	2.15881	<0.042547	9.14302	0.0236694	0.61999	1.30781	0.19517	10.815	4.19937	55.6289	22.2429	114.516	25.9083	246.978	47.3088	10577	1.02032	156.124	340.647
DEMSPA-Grain40 - 52	core/inner part	Analysis 2		<5.006		0.543303	0.122686		352.058		1301.46	3.68863	0.236695	15.4044	0.130106	1.58253	3.341	0.483373	21.3613	7.8693	105.128	42.5149	213.004	46.8953	445.031	85.0471	10145.2	1.52542	335.535	563.929
DEMSPA-Grain41 - 53	rim	few common-Pb		<5.0949		0.472561	<0.073695		169.064		675.549	1.60539	<0.039653	6.59704	<0.028671	0.69849	1.44659	0.281802	11.3885	3.95284	54.1178	21.8412	111.619	25.077	242.442	47.9281	10379	0.675455	113.932	227.942
DEMSPA-Grain42 - 54	rim	Analysis 1		<5.0534		0.478095	<0.060369		203.536		814.598	1.96104	<0.035498	8.29997	0.0316649	0.763706	1.90508	0.287726	12.1853	4.80946	65.8649	26.4103	131.459	29.6238	280.575	54.6122	10447.3	0.89623	138.372	287.447
DEMSPA-Grain42 - 55	rim	Analysis 2		<5.0783		0.421477	<0.071697		231.645		702.802	1.931	<0.052883	8.45499	0.0339801	0.560069	1.61366	0.225129	10.4378	4.12331	56.1523	22.5326	114.471	25.7371	241.465	47.0799	10353.2	0.940242	138.777	287.035
DEMSPA-Grain43 - 56	rim	Analysis 1		<4.9917		0.580558	<0.070567		180.616		1024.92	2.2689	<0.031302	11.1443	0.0632287	1.12733	2.56641	0.438621	15.4025	5.78151	79.6016	32.612	170.134	40.0112	396.572	78.9462	10914.3	1.02972	290.88	556.005
DEMSPA-Grain44 - 58	rim	Analysis 1	apatite avoided	<5.8559		0.454506	<0.079055		181.244		516.265	1.59792	<0.046685	7.53863	0.0288952	0.485291	1.02973	0.265381	7.14292	2.39101	34.8771	15.2541	85.9272	21.5363	238.682	52.0888	9475.79	0.718547	335.068	619.604
DEMSPA-Grain45 - 60	rim		apatite avoided--short signal	<5.8944		0.694653	<0.089753		195.687		645.376	2.04156	0.584472	12.0577	0.1483	0.95206	1.29645	0.363282	9.37349	3.48112	46.5588	19.6271	110.475	26.9342	287.822	61.0954	10420.7	1.11873	434.29	787.915
DEMSPA-Grain47 - 63	core/inner part	Analysis 1		<5.0076		0.429743	0.108691		308.698		1213.4	3.58862	0.533789	16.834	0.199359	1.60382	3.04587	0.419076	20.2645	7.1862	97.978	39.246	198.395	44.3489	424.946	81.0523	10615.6	1.64567	406.777	653.967
DEMSPA-Grain47 - 64	rim	Analysis 2		<5.557		0.493263	<0.080068		237.615		781.978	2.37431	<0.049042	10.8913	0.0321379	0.706712	1.75093	0.311174	10.9961	4.099	57.7104	23.889	130.182	30.678	305.997	61.9275	10359.4	1.15379	415.21	650.279
DEMSPA-Grain48 - 65	core/inner part	Analysis 1		<5.1431		0.469268	0.240672		236.424		1113.15	1.95562	<0.053668	9.54751	0.109837	1.67073	3.08875	0.494956	19.848	6.75557	89.5551	36.0871	182.937	41.1427	399.984	77.0336	10559.1	0.896499	232.701	427.457
DEMSPA-Grain48 - 66	core/inner part	Analysis 2		<4.9918		0.425734	<0.0766		211.758		716.848	2.1294	<0.030441	9.07752	<0.02608	0.652587	1.50709	0.301736	10.3528	3.88257	54.3246	22.3428	118.74	27.2524	267.012	53.1267	10210.1	0.991623	196.991	420.141
DEMSPA-Grain49 - 67	rim	Analysis 1, few common-Pb		<5.0116		0.505443	<0.081296		167.489		733.174	1.96785	<0.039425	7.73844	0.0368922	0.791799	1.48949	0.250599	10.8265	4.04441	56.637	23.0652	120.211	27.4297	265.196	51.9604	10437.7	0.946307	115.66	262.364
FN1-Grain2 - 2	rim			<5.1914		0.540575	<0.069841		346.452		1328.17	3.20368	0.0506127	13.1498	0.085249	1.27837	3.38998	0.479578	21.6734	7.92508	107.349	43.241	215.917	47.7665	452.886	86.178	10402.8	1.43302	344.874	570.587
FN1-Grain6 - 8	rim		shorter avoid melt	<6.7588		0.43391	0.0937101		239.42		1068.82	4.50315	<0.036052	22.3841	0.0869824	1.08619	1.99777	0.44565	14.8854	5.6809	78.6818	32.708	178.673	42.7678	436.101	89.5246	10361.7	2.03785	825.587	1301.85
FN1-Grain11 - 13	rim		very short avoid apatite and melt	<7.4213		0.667811	<0.12054		206.742		718.319	2.33972	0.37759	10.3508	0.137087	1.06884	1.54159	0.264847	9.73712	3.74854	54.2596	22.5806	117.117	26.9452	271.065	54.1311	10037.8	1.05059	240.731	478.606
FN1-Grain12 - 14	rim			<5.0917		0.571738	<0.086206		223.041		1284.21	2.80947	0.0787653	12.0226	0.145561	1.76213	3.21784	0.616596	20.7035	7.29124	100.078	40.555	211.091	48.1335	482.684	96.6559	10126.3	1.16947	345.465	606.784
FN1-Grain13 - 15	rim		shorter avoid apatite	<5.5539		0.642108	<0.078205		142.16		698.124	1.58707	0.116734	6.77733	0.0687437	0.815865	1.35198	0.418088	10.1713	3.39406	50.0745	20.8075	116.549	30.7841	331.854	72.3293	10560.1	0.840711	220.002	491.995
FN1-Grain14 - 16	rim		very short	<8.6803		0.336058	<0.15351		280.242		685.209	1.96083	<0.089504	8.77933	0.0600852	0.693201	1.3113	0.18527	11.4877	4.1148	52.7585	21.6113	108.411	23.8985	233.268	45.2668	11163.3	0.920532	141.94	290.562
FN1-Grain15 - 17	rim			<5.2571		0.34908	<0.06439		266.044		728.562	2.12557	<0.031457	9.21735	<0.015563	0.516633	1.84625	0.18695	11.5651	4.31671	58.6923	23.3474	118.687	26.1033	251.127	48.0744	10567.9	0.942826	152.782	322.619
FN1-Grain17 - 19	rim	Analysis 1	shorter avoid melt	<7.8033		<0.28455	<0.11343		207.693		404.532	1.29657	<0.053478	4.62614	0.0436488	0.235197	0.899218	0.170596	5.33297	2.18781	29.0633	12.7036	68.3035	16.0166	163.549	33.4798	9838.14	0.668982	65.0777	176.569
FN1-Grain17 - 20	rim	Analysis 2		<5.1931		0.256563	<0.067225		175.15		485.811	1.78724	<0.044162	6.78598	<0.021996	0.30587	0.878813	0.142881	7.05923	2.72837	37.8915	15.7627	81.1922	18.0267	174.355	33.4922	10790.2	0.71658	91.2753	215.637
FN1-Grain18 - 21	rim	Analysis 1		<5.0107		0.561639	<0.088648		276.068		879.843	2.65588	0.0387742	10.4802	<0.02692	0.84563	1.86861	0.326169	13.3273	4.95544	69.461	28.1721	145.736	33.5144	319.076	61.2481	10444.6	1.31517	213.036	451.341
FN1-Grain18 - 22	core/inner part	Analysis 2		<5.1092		0.425539	<0.064438		339.349		1412.1	2.04027	<0.0412	10.081	0.102782	1.77465	4.13936	0.509857	25.4962	9.00363	116.932	46.5018	228.057	49.3948	453.643	85.768	10563.5	0.898784	242.006	405.702
FN1-Grain19 - 24	rim	Analysis 1		<5.0942		0.439161	<0.069791		216.929		705.559	2.10508	<0.043968	8.49874	0.0411647	0.686122	1.7474	0.246023	10.6122	4.04104	53.707	22.404	115.835	27.0619	264.954	52.6376	10238.6	0.84502	148.571	330.082
FN1-Grain19 - 25	rim	Analysis 2		<5.0863		0.422435	0.0894886		235.616		735.157	2.61838	<0.040793	11.584	0.0404586	0.673054	1.33479	0.359656	9.03325	3.43697	50.6919	21.9492	125.005	31.6844	337.164	71.4244	10143.9	1.21241	425.085	833.125
FN1-Grain20 - 26	core/inner part		shorter avoid melt	<6.025		0.373868	0.0910232		307.476		1010.72	2.41444	<0.030429	10.8005	0.0348	1.05238	2.67101	0.344085	16.0436	5.88394	80.2593	32.5874	166.301	36.5939	345.427	69.128	10224.3	1.25096	207.84	416.863
FN1-Grain21 - 27	rim	Analysis 1	shorter avoid apatite	<8.7387		0.416099	<0.15188		238.354		598.191	1.79021	<0.062313	7.45605	0.0613138	0.418027	0.98617	0.270169	7.77083	2.97529	43.7446	17.3417	97.8179	23.3204	240.292	51.6715	9335.3	0.829289	247.605	496.364
FN1-Grain21 - 28	core/inner part	Analysis 2		<4.9368		0.417081	<0.084021		249.552		803.209	2.211	<0.040571	7.17113	0.0523909	0.625036	2.01677	0.332277	11.9824	4.37137	63.532	25.6369	134.711	30.5822	298.311	58.9188	9705.04	1.00525	123.193	296.463
FN1-Grain23 - 30	core/inner part	Analysis 1		<5.0061		0.32846	0.0500343		106.942		340.488	1.22597	<0.028964	5.29509	<0.017072	0.279167	0.569899	0.177065	4.31145	1.61761	23.4937	10.324	58.8325	14.9566	160.387	34.7136	9968.35	0.591716	137.225	350.212
FN1-Grain23 - 31	rim	Analysis 2, > U	shorter avoid apatite	<6.6275		0.600328	<0.12493		223.123		1219.36	4.75484	0.0563454	24.9368	0.0962273	1.07142	2.58481	0.627806	17.936	6.61299	94.2327	37.7045	205.053	48.2506	499.847	104.638	10326.1	2.09552	1322.8	1709.7
FN1-Grain25 - 33	rim	Analysis 1	shorter avoid apatite	<6.8758		0.606548	<0.10637		205.32		1046.75	3.7966	<0.052301	17.8042	0.0623434	0.963365	1.98491	0.482436	13.5827	5.27511	74.1612	31.7649	178.284	44.6098	468.433	98.4082	9854.21	1.77415	771.62	1226.87
FN1-Grain27 - 36	rim	few common-Pb	shorter avoid melt	<5.2342		0.543491	0.0819616		246.756		735.367	2.33026	<0.031156	9.61348	0.0280913	0.597527	1.93898	0.274408	11.6129	4.46853	58.0344	23.4247	123.069	28.7501	269.768	52.4033	10330.3	1.18586	180.548	386.993
FN1-Grain28 - 37	rim			<5.1471		0.462364	0.109487		283.382		739.755	2.03313	<0.042987	9.48315	0.0593769	0.626634	1.76231	0.360366	11.075	4.23639	56.4808	23.4098	124.812	28.8271	281.088	55.8019	9857.23	0.914706	258.978	488.946
FN1-Grain29 - 38	rim			<5.1271		0.403832	<0.069876		150.532		470.165	1.65131	<0.040881	6.28582	<0.026968	0.523507	1.07618	0.23879	5.53646	2.07442	30.5935	13.7066	81.476	21.3697	237.32	52.9679	9817.92	0.809013	175.133	467.293
FN1-Grain31 - 40	rim			<5.1368		0.270091	<0.060367		192.046		847.546	3.78705	<0.039298	11.3239	0.0234294	0.607041	1.45388	0.123718	11.4402	4.67163	64.7935	27.0935	146.26	34.1071	336.054	67.2109	10343.8	1.98633	237.744	573.097
FN1-Grain32 - 41	rim	few common-Pb		<5.0702		0.367379	<0.087274		217.79		811.835	2.17128	<0.030642	9.51652	0.0336589	0.831674	2.29238	0.303815	13.3442	4.7799	65.7325	26.0022	131.045	29.2076	268.144	51.0732	10398.5	0.915671	184.036	355.206
FN1-Grain33 - 42	core/inner part			<5.149		0.376656	<0.076218		251.99		1432.88	4.79137	<0.035583	14.8551	0.0550103	1.2379	2.58871	0.6016	16.4877	6.70382	96.6511	43.7474	243.66	58.6245	601.957	121.959	8782.81	1.54044	447.82	860.476
FN1-Grain35 - 44	rim	Analysis 1		<5.2035		0.392954	<0.08479		200.451		734.212	2.25278	<0.042083	9.99666	0.0507266	0.737817	1.91289	0.285488	11.1196	4.13138	56.8982	23.2524	122.116	27.5808	264.464	51.7254	10647.2	1.01801	207.986	416.946
FN1-Grain35 - 45	core/inner part	Analysis 2	very short signal	<8.6887		0.445897	0.171402		266.53		1229.39	2.35428	<0.078291	9.61576	0.0856796	1.56614	3.3362	0.440025	22.6473	8.01527	100.572	40.2394	199.448	42.6636	391.12	75.8115	9472.64	0.99513	188.749	360.024
FN1-Grain36 - 46	rim		La spike avoided	<5.3189		0.377665	<0.068804		191.856		658.89	1.92353	<0.029434	8.30121	<0.031355	0.642009	1.69714	0.228276	9.4028	3.38676	49.1496	20.6452	111.053	25.7342	268.023	52.1934	10250.2	0.836351	203.991	421.876
FN1-Grain38 - 48	rim	Analysis 1		<5.2262		0.343994	<0.075536		217.752		714.946	2.21892	<0.025926	9.52357	0.0235367	0.640924	1.76364	0.261363	10.0874	3.83064	54.5572	22.2617	118.259	27.5722	267.743	53.5618	10269.6	1.02165	273.97	512.178
FN1-Grain38 - 50	core/inner part	Analysis 3		<5.0089		0.219484	<0.071795		303.596		911.523	2.8156	<0.024723	10.9638	0.0243129	0.831238	1.96137	0.340483	13.8126	5.13843	71.6879	29.2105	150.594	33.8701	322.762	62.4872	10584.1	1.27108	217.452	437.162
Td-H-Grain3 - 3	rim	Analysis 1		<5.7207		0.551313	<0.064712		174.894		636.363	2.04615	<0.028865	8.9902	0.0322624	0.40216	1.3731	0.183643	9.06107	3.57022	49.3967	19.76	105.138	23.7746	230.749	44.2199	10472	1.00709	134.176	308.244
Td-H-Grain3 - 4	core/inner part	Analysis 2		<5.6673		0.335392	<0.065976		235.897		688.34	1.65736	<0.044469	8.03808	0.0287763	0.586894	1.73348	0.219066	10.9215	4.18948	55.3635	22.3136	111.995	24.7633	231.948	44.3698	10160.5	0.795603	130.286	280.479
Td-H-Grain4 - 5	rim	Analysis 1		<5.7903		0.219513	0.0591746		156.415		403.896	1.04236	<0.028376	3.955	<0.020611	0.404073	0.822684	0.229799	5.34016	2.01852	28.5717	12.2224	67.5554	16.6392	181.941	38.0379	8739.51	0.46038	77.4291	191.309
Td-H-Grain4 - 6	core/inner part	Analysis 2	shorter avoid apatite	<5.8103		0.246755	<0.08024		197.726		1071.68	1.54806	0.0809529	9.36395	0.0551335	1.18472	2.94024	0.426809	21.6179	7.25108	93.1153	35.6889	169.975	36.0146	328.391	59.8859	10435.2	0.57872	177.675	254.79
Td-H-Grain5 - 7	rim		shorter avoid La incl.	<8.3906		0.474749	0.169939		170.109		1301.15	1.26644	<0.04405	7.10857	0.191409	3.10334	4.13975	1.05698	24.3762	8.05922	103.582	39.9379	206.498	47.1873	462.066	96.3842	8667.21	0.562251	329.773	512.779
Td-H-Grain6 - 8	rim		small La incl.	<5.7028		0.608547	0.0842678		308.901		1675.13	1.6869	0.089631	11.0417	0.188476	3.36124	5.80181	0.760644	34.7885	11.5176	147.092	55.7074	268.569	56.2561	504.107	92.3247	10090.7	0.845846	287.309	422.935
Td-H-Grain7 - 9	rim		shorter avoid apatite	<5.7698		0.358506	<0.04747		205.54		549.303	1.78737	0.0457042	7.59925	0.0554229	0.43942	1.16481	0.188055	8.58608	3.091	42.7031	17.9645	92.9245	21.8689	209.271	41.607	10446.4	0.757795	140.735	292.414
Td-H-Grain8 - 10	rim		shorter avoid melt	<5.8389		0.502191	0.216251		138.259		521.31	1.5481	0.174191	8.41944	0.0537102	0.684191	1.05764	0.247253	6.83646	2.27428	35.9308	15.5829	87.5793	22.6322	249.506	52.4012	10525.8	0.893928	273.351	613.422
Td-H-Grain11 - 13	rim	Analysis 1		<5.7097		0.402761	0.0720377		173.509		497.048	1.50904	<0.037262	7.16422	0.027348	0.457405	1.145	0.29903	6.14038	2.41461	32.7387	14.5533	83.562	21.6153	235.708	50.1483	9757.66	0.724565	252.203	547.67
Td-H-Grain11 - 14	rim	Analysis 2		<5.9575		0.304491	<0.078975		278.725		782.882	2.19077	<0.041927	9.97795	0.0264208	0.761537	1.79002	0.296753	12.7659	4.5025	62.0902	25.2202	129.075	28.544	271.226	52.4615	10402.4	1.06826	198.762	393.66
Td-H-Grain12 - 15	rim			<5.5687		0.486575	<0.086802		268.86		906.698	2.84494	<0.04967	9.73853	0.0315842	0.635046	1.80406	0.301889	13.5116	5.11493	70.9548	28.9269	152.202	34.7238	339.271	66.3809	10415.4	1.39773	175.702	392.03
Td-H-Grain13 - 16	rim	few common-Pb		<5.67		0.257891	<0.069045		176.187		326.137	0.963095	<0.028454	4.18688	0.0152551	0.299769	0.824258	0.229432	4.71309	1.69231	23.2635	9.67675	54.3945	13.3213	143.217	29.8718	8890.2	0.365822	85.9419	205.486
Td-H-Grain14 - 17	core/inner part			<5.5727		0.297666	<0.05309		204.138		597.254	1.86006	<0.040255	7.85897	<0.017053	0.518169	1.18828	0.188403	8.69773	3.26397	45.4168	18.5884	98.9551	23.4601	234.776	46.6562	10530.7	0.935392	151.658	347.57
Td-H-Grain15. - 19	rim	Analysis 2		<5.4835		0.391934	<0.057755		169.812		468.159	1.61825	0.0295614	6.3467	<0.018739	0.431242	0.769543	0.21547	5.99096	2.2139	31.3482	13.8439	79.3271	20.1005	214.218	45.7852	10011.4	0.740036	158.673	364.67
Td-H-Grain16 - 21	core/inner part	Analysis 2		<5.5986		0.318454	<0.057419		258.474		1176.54	2.06012	<0.03869	11.9861	0.0654943	1.26874	3.67059	0.441665	22.4049	7.89926	100.094	38.0331	188.462	40.0797	363.882	68.1389	10458.4	0.986337	218.192	345.715
Td-H-Grain17 - 23	rim	Analysis 2		<5.4272		0.270471	<0.075353		215.597		482.761	1.58485	<0.032041	6.30484	<0.02387	0.273042	0.849248	0.211837	7.0868	2.75489	37.0981	15.4946	81.2761	18.3997	180.534	36.9299	10215.2	0.696292	102.546	253.483
Td-H-Grain18 - 24	rim			<5.5563		0.57423	<0.084929		205.056		932.803	1.4318	<0.035955	7.70531	0.0408915	1.0525	2.87986	0.415209	16.7283	5.86341	77.315	30.3253	150.066	32.5523	301.347	59.1234	10400.6	0.641161	154.938	276.581
Td-H-Grain19 - 25	rim			<5.901		0.425359	<0.069821		256.669		919.088	2.8541	0.0289234	9.72561	0.0359562	0.917429	2.11345	0.303972	14.3381	5.4155	72.2721	29.176	153.037	34.1387	330.97	65.0355	9933.36	1.29653	173.256	372.77
Td-H-Grain23 - 29	rim			<5.4621		0.356846	<0.061822		194.608		504.359	1.56207	<0.031459	7.02948	0.0293457	0.419563	1.14264	0.198695	7.44936	2.71863	37.254	15.3485	82.1831	19.2694	193.925	40.064	11022.6	0.799632	132.907	311.051
Td-H-Grain25 - 32	rim			<5.6161		0.568933	0.0630087		209.623		993.605	2.16927	<0.024618	9.18162	0.0527247	1.14847	2.37927	0.396528	16.476	5.92704	80.3585	32.4743	164.44	35.6571	336.935	66.2356	10581	0.991386	196.741	359.586
Td-H-Grain26 - 33	rim	Analysis 1		<5.529		0.491378	<0.069159		189.968		539.589	1.64635	<0.028489	7.62752	0.0379115	0.592102	1.09013	0.281769	7.20511	2.63485	36.0076	15.3831	89.4423	22.345	238.36	51.6618	10333.4	0.799976	262.363	542.936
Td-H-Grain26 - 34	rim	Analysis 2	shorter avoid apatite	<5.7036		0.367445	<0.061627		190.265		557.121	1.76808	0.0478674	8.712	0.0467424	0.60114	1.11315	0.256959	6.81361	2.64849	37.0536	15.9936	95.1977	24.2199	264.734	59.0506	10839.9	0.934787	302.141	642.397
Td-H-Grain27 - 36	rim	Analysis 2, few common-Pb	shorter avoid apatite	<6.9682		0.466275	<0.10095		343.062		755.565	2.04494	1.41065	10.5744	0.306683	2.13786	1.96547	0.462705	9.63198	3.58094	52.8621	22.1205	127.644	32.4847	348.969	79.6671	9321.49	0.974243	234.999	535.868
Td-H-Grain28 - 37	rim	Analysis 1		<5.394		0.612947	<0.067837		150.333		758.276	2.71118	<0.027948	9.06153	0.0379686	0.453685	1.17205	0.234933	8.28527	3.28342	47.9956	22.0598	129.857	33.7577	369.704	80.9281	10511.6	1.43535	245.329	669.414
Td-H-Grain28 - 38	core/inner part	Analysis 2		<5.5131		0.41148	<0.064066		305.019		1085.91	1.57664	<0.032569	9.60999	0.107551	2.03069	3.66344	0.702345	21.8536	7.39772	94.2151	34.6879	170.764	35.8601	325.251	62.0232	9703.73	0.672255	220.164	299.44
Td-H-Grain29 - 40	rim	Analysis 1		<5.535		0.321373	0.0768117		115.898		446.748	1.50764	<0.037339	6.31963	0.0398415	0.303798	0.958062	0.264618	5.54606	2.08972	29.7656	12.7146	73.8799	18.8279	205.233	45.6099	9835.93	0.705264	190.485	446.257
Td-H-Grain30 - 42	rim	Analysis 1		<5.3407		0.393196	<0.057651		149.64		953.163	1.46961	0.0662669	7.79798	0.0922837	1.49038	2.72658	0.532757	16.4291	5.74359	75.9069	30.1566	155.569	36.5161	354.74	71.0244	10170.9	0.625194	256.419	422.905
Td-H-Grain30 - 43	rim	Analysis 2		<5.4828		0.383808	0.0730195		198.343		1240.77	1.73536	<0.036372	9.7542	0.0600447	1.52973	3.60977	0.583333	23.0679	8.19803	105.456	40.7616	199.037	42.9719	394.242	73.8075	10646.5	0.772966	199.563	335.065
Td-H-Grain32 - 45	core/inner part	Analysis 1		<5.4941		0.518572	<0.06674		207.148		564.493	1.78838	<0.018326	7.18467	0.0338458	0.381696	1.23503	0.195469	8.64469	3.32834	44.726	18.1345	92.3063	20.8994	194.864	37.1603	10273.7	0.716694	101.283	215.141
Td-H-Grain32 - 46	core/inner part	Analysis 2		<5.3619		0.485016	<0.076928		287.409		1028.07	2.50094	<0.023957	9.71627	0.07204	0.905712	2.56488	0.333896	17.2687	6.26446	83.3069	32.9356	168.733	36.9433	346.301	67.7037	9872.06	1.01589	163.209	317.124
Td-H-Grain33 - 47	rim	few common-Pb	shorter avoid melt	<6.3626		0.812148	<0.073571		203.402		1277.44	1.62922	<0.034911	8.93278	0.16116	2.44451	4.05067	0.850607	20.705	7.18996	95.591	39.1062	208.118	50.6605	515.831	108.562	9418.58	0.792584	477.681	755.87
Td-H-Grain33 - 48	core/inner part	Analysis 2		<5.3136		0.541361	0.104676		288.819		1249.74	3.69121	<0.027585	13.0043	0.0655654	1.30061	3.05447	0.462945	19.3756	7.23634	99.1397	39.8216	208.15	45.7828	436.504	84.5901	10211.6	1.63437	264.232	523.903
Td-H-Grain34 - 49	core/inner part	Analysis 1		<5.4288		0.439165	<0.082302		362.515		1261.68	1.90401	<0.028294	9.46731	0.0902104	1.56267	3.69451	0.464872	22.989	7.86014	104.416	40.8697	200.9	43.3097	402.936	76.2166	10153.7	0.864999	202.128	347.577
Td-H-Grain37 - 53	rim	Analysis 1		<5.4529		0.304651	<0.071122		183.709		613.947	1.79752	<0.043224	7.64393	<0.02133	0.625962	1.51447	0.234258	8.80984	3.30454	45.5703	19.1536	101.062	24.0827	247.891	50.598	9829.59	0.832081	161.258	365.868
Td-H-Grain39 - 57	rim	Analysis 2		<5.3024		0.555921	<0.074986		227.497		730.57	2.17063	0.0433547	7.57521	0.0416778	0.446723	1.61582	0.224958	10.4689	4.05212	56.1752	23.2276	120.226	27.5195	267.652	52.873	10100.5	1.10164	124.793	294.416
Td-H-Grain41 - 59	core/inner part			<5.2859		0.244842	<0.067321		212.3		822.604	2.44312	0.0195625	8.27719	0.0356066	0.609504	1.87473	0.290576	11.6893	4.40028	63.4752	25.6709	136.82	32.1793	316.798	63.9138	10114.4	1.37745	136.104	329.721
Td-H-Grain42 - 60	rim			<5.3229		0.409334	<0.063935		238.59		1395.26	1.41432	0.0241076	9.82267	0.106244	2.38663	5.37937	0.826103	31.2706	10.0776	126.618	47.3111	223.524	45.8287	412.747	74.3955	9845.92	0.613531	205.773	280.736
EG1 - 5	core/inner part	few common-Pb		<4.9773		0.955564	0.0897886		456.003		1315.89	3.39198	2.12849	19.8663	0.642484	3.70538	3.95161	0.906366	23.0864	7.77056	102.06	42.1121	219.601	51.9058	533.918	110.207	10061.8	1.45597	565.348	827.438
EG1 - 7	rim			<5.0717		0.709122	0.123012		325.616		1712.56	7.26246	<0.03279	19.5231	0.075089	1.10155	3.07104	0.677556	25.894	9.85723	137.029	57.4153	292.911	65.9505	634.266	125.409	9796.34	2.49624	794.56	1080.7
EG1 - 9	rim			<4.9425		0.649721	0.102215		330.559		1078.95	3.90143	1.35407	17.8453	0.362414	1.88805	1.85668	0.524692	14.5712	5.41626	77.8399	33.5854	184.024	44.705	474.059	100.796	10149.6	1.69481	525.904	775.047
EG1 - 11	rim			<4.9649		0.61223	<0.082715		332.06		1588.62	6.24959	<0.049254	18.6702	0.0982858	1.39226	3.12919	0.689625	24.97	9.76494	133.283	54.1962	273.187	60.5662	583.367	109.587	9178.27	1.81523	786.76	892.347
EG1 - 15	core/inner part			<4.9335		0.9732	0.0806211		594.486		2293.62	7.75578	<0.046843	22.3606	0.108558	1.57539	4.85929	0.823078	36.0403	13.4699	183.737	76.1166	392.623	88.941	859.747	170.351	9493.41	2.511	832.532	1305.15
EG1 - 16	core/inner part of 17			<7.4328		0.524459	<0.11382		382.989		888.675	3.54967	<0.076447	10.3145	0.0810918	0.612618	1.51771	0.354733	10.3014	4.1575	59.2278	26.7519	150.867	38.9319	416.137	93.3804	9751.93	1.6731	252.258	579.424
EG1 - 17	rim			<4.9149		0.558696	0.0690801		188.58		1144.74	4.13047	<0.032229	12.0242	0.0580408	0.894823	2.47792	0.505611	15.207	5.76272	82.5038	35.4055	194.969	48.058	496.335	106.394	10376.3	1.82421	358.791	725.31
EG1 - 19	rim			<5.0533		0.566991	<0.077882		301.745		895.818	2.99762	<0.032265	8.60006	0.0360121	0.470652	1.45698	0.315624	11.0751	4.37586	62.4703	27.9484	154.142	38.323	408.196	87.256	10596.4	1.30647	249.398	595.134
EG1 - 20	rim			<5.0307		0.708411	<0.079902		362.419		806.464	2.79239	1.37708	15.4216	0.335711	1.77885	1.88602	0.413396	11.8371	4.57385	61.3205	26.2331	135.91	32.4205	333.212	70.8625	9952.79	1.27541	442.995	653.514
EG1 - 21	rim			<4.9389		0.647691	0.0980465		275.95		1400.45	5.60177	<0.054239	16.0988	0.0605426	1.20975	2.91705	0.553613	21.0459	8.18851	112.095	46.5509	238.987	53.5061	516.368	101.209	9433.16	1.7268	670.978	832.976
EG1 - 25	core/inner part			<4.8571		0.54496	<0.072349		247.422		1401.72	3.83502	0.031771	12.4587	0.0909736	0.962566	3.18087	0.536401	19.302	7.24191	101.542	44.1465	239.676	58.6521	604.618	127.694	10514.4	1.85791	375.735	792.249
EG1 - 26	core/inner part			<5.0233		0.746595	0.089671		357.346		1006.73	4.12802	1.21405	18.1882	0.325468	1.78308	1.75277	0.498246	13.1932	4.92046	72.1161	30.8547	170.521	42.1887	438.454	93.4903	10386.4	1.74984	415.478	718.705
EG1 - 35	rim			<4.9996		0.46902	<0.068855		199.755		759.13	2.86085	<0.02084	9.34232	0.0336889	0.400366	1.12834	0.329769	8.2755	3.45133	50.9614	22.451	131.963	33.9935	365.997	81.6946	10383.9	1.28204	242.052	504.866
EG1 - 37	rim			<5.1555		0.394684	<0.093527		251.52		1156.99	3.99545	<0.03229	14.142	0.058401	0.697677	2.00725	0.500035	14.3863	5.59395	81.6363	35.7667	199.476	48.5858	501.161	107.811	9923.52	1.53913	352.027	630.506
EG1 - 38	core/inner part of 37			<5.1511		0.58715	0.0836207		334.406		1581.18	6.65558	0.0524683	20.6511	0.0514023	1.04621	2.51477	0.55182	18.6626	7.40712	111.085	48.6519	269.405	65.2404	667.447	139.461	10244.7	2.39452	614.648	1042.59
EG1 - 39	core/inner part			<5.0517		0.659803	<0.073059		301.279		1468.05	6.5082	<0.054271	14.7493	0.0312402	0.614934	2.43451	0.438529	18.3828	7.36806	105.778	46.5148	252.437	60.8126	617.812	127.282	10237.4	2.78938	500.45	1082.79
EG1 - 40	rim		melt and apatite avoided	<5.4296		0.418436	0.144139		289.663		1345.43	5.95385	0.125583	14.9105	0.0640814	1.11767	2.36261	0.404662	17.8544	7.24766	100.059	42.7493	233.612	54.5902	554.331	114.717	10504.6	2.48939	474.277	923.372
EG1 - 41	rim			<4.982		0.433787	<0.078246		341.751		799.655	1.96916	<0.050802	7.53509	0.0309197	0.605345	1.25439	0.34884	9.49068	3.57562	54.0385	24.1761	137.404	34.7825	373.755	84.2803	9931.28	0.848593	236.606	520.155
EG1 - 42	rim			<5.0741		0.329662	0.129839		242.912		750.424	2.44083	0.039337	11.0925	0.0455755	0.716012	1.67636	0.313587	9.84588	3.80038	52.7961	23.5619	126.602	31.036	328.097	70.4298	10169.5	1.10881	271.281	472.727
EG1 - 43	rim			<4.9939		0.638202	<0.084051		196.156		727.472	2.61816	<0.043256	9.35789	0.0234927	0.403829	1.39646	0.299931	8.63715	3.28835	50.173	22.2317	126.654	32.0738	343.345	76.7259	10375.4	1.3421	210.382	473.728
EG1 - 45	rim			<4.9979		0.502937	0.100373		221.592		764.646	2.53745	<0.032595	10.8931	0.0518386	0.783745	1.37357	0.263381	10.0701	3.74858	54.4431	23.7192	128.435	32.1035	339.786	72.0997	10087.5	1.07076	327.657	492.14
EG1 - 48	rim			<6.8541		1.18044	0.169933		675.574		868.227	3.39076	4.68898	20.6384	1.10759	4.77234	1.97713	0.43226	10.3012	3.98799	61.768	26.1876	150.237	36.0581	385.087	85.661	9918.2	1.59904	291.812	630.519
EG1 - 49	rim	few common-Pb	apatite avoided	<6.1464		0.404553	<0.10118		145.14		386.006	1.28781	<0.053644	4.98076	<0.03202	0.273399	0.780492	0.220908	4.43512	1.85055	26.4024	11.754	65.9701	16.7161	181.431	41.4339	9935.98	0.552042	82.8118	197.629
EG1 - 50	core/inner part of 49			<4.9484		0.397361	<0.076645		323.905		794.224	2.15087	<0.037484	8.06034	<0.02995	0.560722	1.45314	0.389575	9.21494	3.6177	52.7877	24.0988	139.81	35.0775	381.345	84.4004	9531.99	0.956591	145.01	334.702
EG1 - 51	rim			<5.1665		0.584596	<0.097285		314.776		1151.5	4.3327	<0.054046	13.7999	0.0624762	0.957148	2.62044	0.487904	16.7476	6.8819	92.6668	38.2184	196.669	44.2961	431.876	85.6984	9792.03	1.64504	643.315	869.456
EG1 - 52	rim			<5.0496		0.744556	<0.073471		260.354		1062.5	3.80359	<0.041498	12.7901	<0.036082	0.818054	1.81224	0.489337	11.693	4.77384	71.4301	32.1234	186.068	46.5792	509.766	111.42	9833.46	1.273	279.954	544.871
EG1 - 54	rim			<5.0277		0.321337	<0.066752		218.488		503.188	1.83451	<0.032822	7.74278	<0.024261	0.355966	0.919434	0.249801	6.9366	2.55582	35.608	15.6023	88.0899	21.7755	236.978	50.6092	10466.3	0.834255	189.526	368.269
EG1 - 55	core/inner part		very short signal	<6.2046		0.711603	<0.098783		272.267		1245.46	4.76451	<0.066832	11.1011	0.0612201	0.783725	2.15432	0.433155	15.6395	6.51028	92.0413	39.5478	219.084	52.5181	540.732	110.101	10074.9	1.78795	288.282	658.419
EG1 - 56	rim			<5.0737		0.456153	<0.074558		196.134		1019.53	5.42564	<0.049244	17.175	0.0576754	0.888925	1.90875	0.369657	15.0795	5.69041	78.563	32.5924	170.726	40.8024	414.776	85.2579	10748.1	2.36943	838.356	1122.79
EG1 - 57	rim			<5.2284		0.479836	<0.089081		212.286		757.19	3.0573	<0.054011	9.28582	<0.029485	0.455126	1.27366	0.304	8.75051	3.43935	52.1101	23.3463	133.808	34.3728	378.136	84.1225	10296.1	1.31231	208.655	476.88
EG1 - 59	rim			<5.0053		0.807254	0.197465		372.33		1521.94	7.65438	0.382056	30.9384	0.134967	1.68706	3.63204	0.696278	23.5585	8.88021	120.918	48.7199	255.562	58.6789	593.861	120.332	10378.5	3.22988	1368.64	1556.1
EG1 - 60	rim			<4.9621		0.602061	<0.074229		262.515		671.331	1.80119	<0.037842	10.9349	0.0269374	0.622986	1.40526	0.36028	9.48916	3.50173	48.4422	20.6992	113.703	27.4689	295.41	62.9909	9853.6	0.884619	375.671	539.585
EG1 - 62	rim			<5.1446		0.582705	<0.093911		259.736		877.647	3.44894	<0.04196	9.16171	0.0250095	0.51425	1.35445	0.326034	10.3004	4.25076	60.9943	27.5532	156.003	39.035	425.48	91.339	10543.3	1.83207	216.979	570.683
CsO1 - 2	rim			<4.9139		0.513499	0.151601		391.766		1867.9	6.73807	0.405745	34.0621	0.286986	4.03906	7.47795	1.4218	45.4089	14.4006	179.164	65.0911	304.012	62.7377	561.631	102.6	9250.1	2.0591	937.765	883.286
CsO1 - 4	rim			<5.0609		0.484931	0.164742		274.235		1202.31	4.58097	0.0254941	18.6969	0.0779327	1.45179	3.15278	0.580794	20.3598	7.3731	96.2047	38.8092	199.341	44.5373	426.594	83.508	10579.5	1.80874	538.163	824.617
CsO1 - 9	rim			<4.9102		1.11883	<0.077165		550.969		1288.6	6.31926	1.34151	16.4247	0.506949	2.98257	3.04443	0.393777	18.9497	7.27426	102.981	42.3451	223.174	51.8284	515.945	99.2961	11288.4	2.94518	445.649	1091.12
CsO1 - 12	rim		very short signal	<8.4296		0.972562	<0.13166		256.032		953.607	2.97581	0.816649	14.7776	0.303094	2.58941	3.39831	0.605716	17.4425	6.23737	84.0063	32.0661	157.08	34.2504	315.181	61.891	9107.33	1.14369	305.908	470.243
CsO1 - 13	rim			<4.9164		0.391711	0.0720413		262.603		1033.88	3.82537	<0.026156	13.769	0.0544089	1.17228	2.54564	0.534212	16.5131	5.84596	81.6752	33.0286	173.451	39.8456	399.671	79.2156	9902.81	1.59607	329.929	650.139
CsO1 - 15	rim			<4.8025		0.486226	0.0910999		255.084		1066.06	4.13712	<0.058453	15.2986	0.0635726	1.11167	2.56175	0.459946	17.0672	6.41974	87.8822	35.1447	179.251	40.1727	384.932	74.0467	10789.8	1.83546	486.744	899.849
CsO1 - 16	rim of 15			<4.8603		0.502109	<0.06341		347.484		1107.87	2.58483	0.0960761	8.17395	0.0652189	1.08815	2.6503	0.545437	18.7085	6.68921	91.1528	36.532	190.827	44.0733	429.782	84.0736	10595	1.08784	186.25	520.887
CsO1 - 17	rim			<4.9762		0.686244	0.130017		336.965		1742.53	7.09135	<0.043181	34.609	0.205999	2.95033	6.70191	1.15269	41.3903	13.7871	165.309	62.1989	289.47	60.4879	544.944	96.91	9489.69	2.05378	1016.13	941.356
CsO1 - 19	rim			<5.0126		0.612324	0.21958		190.716		906.331	3.83409	<0.032708	9.15515	<0.035605	0.67183	1.66137	0.36109	12.2167	4.59439	67.9586	28.1992	155.628	38.2608	398.086	81.563	11087.4	2.12174	188.764	573.318
[truncated: 730 more rows]

## Sheet: SRM
Samples	Comments	P	Ti49	Ti_ppm_m49_Int2SE	Ti_ppm_m49_LOD	Zr	Y	Nb	La	Ce	Pr	Nd	Sm	Eu	Gd	Tb	Dy	Ho	Er	Tm	Yb	Lu	Hf	Ta	Th	U
[truncated: 156 more rows]

[truncated: 1 more sheets: SRMcomparison]
